# Supplementary material for: Meta-analysis of genome-wide association studies identifies eight new loci for type 2 diabetes in east Asians
Source: Springer Nature journal article supplement (doi:10.1038/ng.1019), 2011-12-11
Supplement: 41588_2012_BFng1019_MOESM23_ESM.pdf [file 41588_2012_BFng1019_MOESM23_ESM.pdf]

## SUPPLEMENTARY NOTE

### SUMMARY OF ABBREVIATION

#### I. Affiliation

|         |        |                                                |
|---------|--------|------------------------------------------------|
| Stage 1 | KNIH   | Korea National Institute of Health             |
|         | NUS    | National University of Singapore               |
|         | SERI   | Singapore Eye Research Institute               |
|         | VU     | Vanderbilt University                          |
|         | SCI    | Shanghai Cancer Institute                      |
|         | NCGM   | National Center for Global Health and Medicine |
|         | SINICA | Academia Sinica                                |
| Stage 2 | UNC    | University of North Carolina                   |
|         | UT     | The University of Tokyo                        |
|         | RIKEN  | RIKEN                                          |
|         | KNIH   | Korea National Institute of Health             |
| Stage 3 | SJTU   | Shanghai Jiao Tong University                  |
|         | NCGM   | National Center for Global Health and Medicine |
|         | SJTU   | Shanghai Jiao Tong University                  |
|         | CUHK   | Chinese University of Hong Kong                |
|         | NTUH   | National Taiwan University Hospital            |
| Overall | SNUH   | Seoul National University Hospital             |
|         | AGEN   | Asian Genetic Epidemiology Network             |

#### II. Study

|         |        |                                               |
|---------|--------|-----------------------------------------------|
| Stage 1 | KARE   | Korea Association Resource Study              |
|         | SDCS   | Singapore Diabetes Cohort Study               |
|         | SP2    | Singapore Prospective Study Program           |
|         | SIMES  | Singapore Malay Eye Study                     |
|         | CAGE   | Cardiometabolic Genome Epidemiology Network   |
|         | SDGS   | Shanghai Diabetes Genetic Study               |
|         | TDS    | Taiwan T2D Study                              |
|         | CLHNS  | Cebu Longitudinal Health and Nutrition Survey |
| Stage 2 | BBJ    | BioBank Japan                                 |
|         | HT2DS  | Health2 T2D Study                             |
|         | SJTUDS | Shanghai Jiao Tong University Diabetes Study  |

|         |        |                                                    |
|---------|--------|----------------------------------------------------|
| Stage 3 | CAGE   | Cardiometabolic Genome Epidemiology Network        |
|         | SDIID  | Shanghai Diabetes Institute Inpatient Database     |
|         | SDS    | Shanghai Diabetes Study                            |
|         | CUHKDS | Chinese University of Hong Kong Diabetes Study     |
|         | NTUHDS | National Taiwan University Hospital Diabetes Study |
|         | SNUHDS | Seoul National University Hospital Diabetes Study  |

## STUDY SAMPLES AND T2D DIAGNOSIS

### I. Stage 1

#### **Korea Association Resource Study (KARE)**

The Korea Association Resource (KARE) study was initiated in 2007 to undertake a large-scale GWA analysis for Type 2 Diabetes (T2D) and numerous complex quantitative traits amongst the 10,038 participants (aged between 40 and 69) of the Ansung (n=5,018) and Ansan (n=5,020) population-based cohorts. About 10,000 subjects from KARE study cohorts were genotyped with Affymetrix Genome-Wide Human SNP array 5.0. Two KARE study cohorts were established as part of the Korean Genome Epidemiology Study (KoGES) in 2001. The sampling base for both cohorts is in KyungGi-Do province, close to Seoul, the capital of the Republic of Korea. Both cohorts were designed to allow longitudinal prospective study and adopted the same investigational strategy. Participants have been examined every two years since baseline (2001). More than 260 traits have been extensively examined through epidemiological surveys, physical examinations, and laboratory tests applied to Ansung and Ansan cohort members. Among a total of 10,038 KARE study participants, 1,042 subjects were included as T2D cases according to the following criteria: (1) treatment of T2D, (2) fasting plasma glucose  $\geq 7$  mmol/L or plasma glucose 2-h after ingestion of 75gm oral glucose load  $\geq 11.1$  mmol/L and (3) age of disease onset  $\geq 40$  years. The inclusion criteria of nondiabetic control subjects (n = 2,943 ) were as follows: (1) no history of diabetes and (2) fasting plasma glucose  $< 5.6$  mmol/L and plasma glucose 2-h after ingestion of 75gm oral glucose load  $< 7.8$  mmol/L at both baseline and follow up studies.

#### **Singapore Diabetes Cohort Study (SDCS)**

The Singapore Diabetes Cohort Study (SDCS) is a research initiative led by the National University of Singapore together with the National Healthcare Group Polyclinics, National University Hospital Singapore and Tan Tock Seng Hospital. Questionnaire data as well as clinical data of consenting patients were obtained together with bio-specimens such as blood and urine archived at  $-80^{\circ}\text{C}$ . Patients with an established diagnosis of T2D who were seen at one of these institutions were approached to participate. The participation response rate is excellent at more than 90%. For the purpose of this study, 2,010 Chinese subjects were available for genome wide analysis and they constituted the cases on SDCS/SP2 and SDCS/SP2.

#### **Singapore Prospective Study Program (SP2)**

The Singapore Prospective Study Program (SP2) includes 6,968 participants from a random

sample of individuals from the Singapore population, aged 24 to 95 years, with disproportionate sampling stratified by ethnicity to increase the number of minority ethnic groups (Malays and Asian Indians). From 2003–2007, 10,747 participants were invited to participate by linking their unique national identification numbers with national registries, of which 7,742 attended the interview component. Of these 7,742 participants, 5,163 attended the clinical examination. A total of 5,499 Chinese, 1,405 Malays and 1,138 Asian-Indians were available at the time of the study and only the Chinese were used for this study. These Chinese constituted the 1,945 controls on SDCS/SP2 and SDCS/SP2, with no prior history of diabetes and had a fasting glucose level of not more than 6.0 mmol/L.

### **Singapore Malay Eye Study (SiMES)**

The Singapore Malay Eye Study (SiMES) is a population-based, cross-sectional study of Malay adults (N = 3,280), aged 40 – 80 years living in Singapore. Of the 4,168 eligible participants invited, 3,280 participated in the study (78.7% response rate). In brief, age-stratified random sampling of all Malay adults aged from 40–80 years residing in 15 residential districts in the southwestern part of Singapore was performed. Cases and controls were selected from the population based cross sectional study design where diabetic cases were defined as having either a history of diabetes or had HbA1c level more than 6.5%. Controls had no history of diabetes and HbA1c level less than 6%. This yielded 794 Malay diabetic cases with 1,240 controls.

### **National Center for Global Health and Medicine (NCGM), Japan**

T2D cases were enrolled from the clinical practice or the annual medical checkup of university hospitals, medical institutions, and general practitioners that constitute the Study Group of the CAGE (Cardiometabolic Genome Epidemiology) Network according to the 1999 WHO criteria. Exclusion criteria for cases were individuals with diabetes due to: (1) liver dysfunction; (2) monogenic disorder known to cause diabetes; and (3) positive anti-GAD antibody. The inclusion criteria for controls were as follows: (1) no past history of urinary glucose or glucose intolerance (2) HbA1c, <5.6% or a normal glucose (75g) tolerance test and (3) age at examination,  $\geq 55$  years. Blood samples were drawn after an overnight fast to measure fasting blood glucose and HbA1c when applicable. Sample size is 931 diabetic cases and 1404 non-diabetic controls for T2D case-control study.

### **Shanghai Diabetes Genetic Study (SDGS)**

The SDGS includes genome wide scan data of 1019 diabetes case and 1710 controls. Details of the study design have been described elsewhere<sup>1</sup>. Briefly, diabetes cases in the SDGS included 886 incident T2D cases identified in the Shanghai Women's Health Study (SWHS), a population-based cohort study of 75000 women<sup>2</sup> and 133 prevalent T2D cases identified from female controls of the Shanghai Breast Cancer Study (SBCS), a population-based case-control study<sup>3</sup>. The 886 diabetes cases identified from the SWHS all met the following criteria: (1) age  $\leq 65$  with a self-reported diabetes diagnosed after study enrollment; (2) used diabetes medication; (3) had fasting glucose level  $> 7$  mmol/L at least twice, and (4) donated a blood sample. The 133 diabetes cases identified from the controls of SBCS were women who were diagnosed with T2D and were on diabetes medication or had a blood glucose level  $> 7$  mmol/L (measured by study). The 1710 controls used in this GWAS were shared with a GWAS of breast cancer that was recently completed and was based primarily based on the Shanghai Breast Cancer Study (SBCS). Excluded from the control group are women who (1) had a self-reported history of diabetes; or (2) had a blood glucose level between 5.5 and 7

mmol/L and had HbA1C>6.1% or had no HbA1C data.

### **Taiwan T2D study (TDS)**

A total of 2,798 unrelated individuals with T2D, age > 20 years, were recruited from China Medical University Hospital (CMUH), Taichung, Taiwan; Chia-Yi Christian Hospital (CYCH), Chia-Yi, Taiwan; and National Taiwan University Hospital (NTUH), Taipei, Taiwan. All of the T2D cases were diagnosed according to medical records and fasting plasma glucose levels using American Diabetic Association criteria. Subjects with type 1 diabetes, gestational diabetes, and maturity-onset diabetes of the young (MODY) were excluded from this study. The controls were randomly selected from the Taiwan Han Chinese Cell and Genome Bank. The criteria for controls in the association study were (1) no past diagnostic history of T2D, (2) HbA1C ranging from 3.4 to 6, and (3) BMI ≤ 32. The two control groups were comparable with respect to BMI, gender, age at study, and level of HbA1C. All of the participating T2D cases and controls were of Han Chinese origin, which is the origin of 98% of the Taiwan population<sup>4</sup>.

### **Cebu Longitudinal Health and Nutrition Survey (CLHNS)**

The CLHNS is a community-based birth cohort study that originally enrolled 3,327 pregnant women from the Metropolitan Cebu, Philippines area in 1983-4 (3,080 singleton live births), and has since followed them and their offspring. For this study of CLHNS mothers, glucose levels were collected in the year 2005, and the study sample consists of 159 T2D cases and 1624 controls. T2D was defined as overnight fasting plasma glucose level ≥ 7.0 mmol/L or current use of anti-diabetic medication. Controls were defined as overnight fasting plasma glucose level < 7.0 mmol/L and treatment naive. Whole blood glucose levels were converted to plasma glucose level by subtracting 0.97 mmol/L<sup>5</sup>.

## II. Stage 2

### **BioBank Japan (BBJ)**

The subjects were recruited from several medical institutes in Japan, including Fukujiji Hospital, Iizuka Hospital, Iwate Medical University School of Medicine, National Hospital Organization Osaka National Hospital, Nihon University, Nippon Medical School, Osaka Medical Center for Cancer and Cardiovascular Diseases, The Cancer Institute Hospital of Japanese Foundation for Cancer Research, Tokushukai Hospitals and Tokyo Metropolitan Geriatric Hospital. We selected T2D cases from individuals registered as having T2D. Diabetes was originally diagnosed according to the World Health Organization (WHO) criteria. Type 2 diabetes is clinically defined as disease with a gradual adult onset. Subjects who tested positive for antibodies to glutamic acid decarboxylase (GAD) and those diagnosed with a mitochondrial disease or MODY were not included in the case group. Controls were individuals registered as individuals not having T2D but with diseases other than T2D, comprised of 13 distinct diseases, or healthy volunteers. Subjects who had been analyzed in the previous report<sup>6</sup> were excluded and not included in the present study. We first genotyped 4,878 individuals with T2D (case 1, age, 65.8 ± 10.0 years; BMI, 24.1 ± 3.8 kg/m<sup>2</sup>; (all values are expressed as mean ± s.d.)) and 3,345 controls (control 1, age, 52.5 ± 15.2 years; BMI, 22.5 ± 3.8 kg/m<sup>2</sup>; (all values are expressed as mean ± s.d.)). We then selected 7,541 subjects belonging to the Hondo cluster (4,470 cases and 3,071 controls).

### **Health2 T2D Study (H2T2DS)**

A total of 1,183 T2D cases were selected from population-based 'Health2 cohort'. Health2 cohort recruited a total of 8,500 participants aged 40-69 years from five regional cities in Korea based on the Korean Genome Epidemiologic Study (KoGES) project. T2D cases were included according to the following criteria: (1) using diabetes medication, (2) fasting plasma glucose  $\geq 7$  mmol/L or plasma glucose 2-h after ingestion of 75g oral glucose load  $\geq 11.1$  mmol/L and (3) age of disease onset  $\geq 40$  years. Among a total of 1,305 T2D controls, 633 subjects were selected from Health2 cohort according to the following inclusion criteria: (1) no past history of diabetes, (2) no anti-diabetic medicine, (3) fasting plasma glucose  $< 5.6$  mmol/L and plasma glucose 2-h after ingestion of 75g oral glucose load  $< 7.8$  mmol/L and (4) subjects older than 60 years of age. Remaining 672 T2D controls were selected from Health Examinee (HEXA) cohort shared control study that was initially designed in 2008 for the Korean cancer and coronary artery disease (CAD) GWA studies by randomly selecting approximately 3,700 of 1,200,000 subjects aged 40-69 from the HEXA cohort. HEXA cohort is another KoGES population-based cohort. Of 3,700 HEXA shared control study subjects, 672 were selected as T2D controls based on the following criteria: (1) (1) no history of diabetes, (2) no anti-diabetic medicine and (3) fasting plasma glucose  $< 5.6$  mmol/L.

### **Shanghai Jiao Tong University Diabetes Study (SJTUDS)**

The cases ( $n = 190$ ) were probands of type 2 diabetic pedigrees with fasting plasma glucose  $\geq 7.0$  mmol/L and/or 2-h post plasma glucose  $\geq 11.1$  mmol/L and diagnosed before 40 years old. Type 1 diabetes and mitochondrial diabetes were excluded by clinical, immunological (based on GAD and IAA test) and genetic criteria. The controls ( $n = 198$ ) were subjects with normal glucose regulation with fasting plasma glucose  $< 6.1$  mmol/L and 2-h plasma glucose  $< 7.8$  mmol/L as assessed by standard 75g OGTTs, negative diabetic family history and aged over 50 years old. All subjects were recruited from Shanghai Diabetes Institute of Shanghai Jiao Tong University.

## III. Stage 3

### **Cardiometabolic Genome Epidemiology (CAGE) Network**

In the case-control panel of the CAGE Network, T2D cases ( $n = 1,110$ ) were enrolled according to the 1999 WHO criteria, while unaffected controls ( $n = 1,014$ ) were enrolled according to the following criteria: (1) no past history of urinary glucose or glucose intolerance; (2) HbA1c,  $< 5.6\%$  or a normal glucose (75g) tolerance test; and (3) age at examination,  $\geq 55$  years. In addition, population-based subjects (740 cases and 4,889 controls from the CAGE-Fukuoka Study) and the Biobank Japan (<http://biobankjp.org/>) cases ( $n = 3,403$ , BBJ samples independent of those used for the stage-2 analysis) were included in this case-control study. In the CAGE-Fukuoka Study (12,569 participants in total), diabetes was defined as HbA1c  $\geq 7.0\%$  or under treatment of diabetes; the controls were chosen as non-diabetic subjects who met the following conditions: age,  $\geq 55$  years; HbA1c,  $\leq 5.0\%$ ; no previous and/or current treatment for diabetes; and absence of renal failure (serum creatinine,  $< 3.0$  mg/dL), as previously described<sup>7</sup>.

### **Shanghai Diabetes Institute Inpatient Database (SHDIID) and Shanghai Diabetes Study (SHDS) at SJTU**

The Shanghai Diabetes Inpatient Database (SHDIID) recruited participants from inpatients in

the Department of Endocrinology and Metabolism, Shanghai Jiao Tong University Affiliated Sixth People's Hospital beginning in 2001. Detailed phenotypes of glucose and lipid metabolism, blood pressure, liver and kidney function, and diabetic complications were collected<sup>8-10</sup>. The current study included 5,950 patients of type 1 diabetes, T2D or some genetic syndromes related to diabetes (e.g., Pader Willi, Rabson Manderhall). All participants are Chinese Han ancestry residing in Shanghai area. For stage 3 replication genotyping, 3,410 T2D patients were selected from SHDIID. Shanghai Diabetes Study (SHDS) is a community-based survey of diabetes performed in Shanghai area by SJTU. Baseline surveys were performed for 5,994 participants in 1998–2001 (SHDS I) and for another 5,372 participants in 2007–2008 (SHDS II). The controls of stage 3 analysis were 3,412 subjects from SHDS I and II with normal glucose regulation as assessed by standard 75 g OGTTs. All T2D patients from both studies were negative for glutamic acid decarboxylase (GAD) and insulin autoantibody (IAA) tests.

### **Seoul National University Hospital (SNUH) Study**

The Seoul National University Hospital (SNUH) case-control samples were consisted of 761 T2D patients of the Diabetes Clinic of SNUH and 632 nondiabetic control subjects. T2D was diagnosed using the World Health Organization criteria. Subjects positive for GAD antibodies were excluded. Nondiabetic control subjects were selected according to the following criteria:  $\geq 60$  years old, no history of diabetes, no first-degree relatives with diabetes, fasting plasma glucose  $< 6.1$  mmol/L, and HbA1c  $< 5.8\%$ .

### **National Taiwan University Hospital (NTUH)**

The studied population comprised 1520 normoglycemic control subjects and 1520 type 2 diabetic patients from a Han Chinese population in Taiwan. The glucose tolerant control subjects by 75-g oral glucose tolerance tests (OGTT) were recruited from routine health examinations, and type 2 diabetic patients were recruited from the metabolism clinics of the National Taiwan University Hospital. Type 2 diabetic patients were diagnosed based on the criteria of the American Diabetes Association with fasting plasma glucose  $\geq 7$  mmol/L or 2-hour plasma glucose  $\geq 11.1$  mmol/L during an OGTT. Patients with ages of onset under 35 years were excluded.

### **Chinese University of Hong Kong (CUHK)**

The subjects in the Hong Kong case-control study were of southern Han Chinese ancestry and resided in Hong Kong, as described previously<sup>11</sup>. The cases consisted of 1,477 subjects with T2D selected from the Prince of Wales Hospital Diabetes Registry<sup>12</sup>. A total of 726 of these individuals had early-onset diabetes (age at diagnosis of  $< 40$  years) and a positive family history; an additional 751 patients were randomly selected from the same registry. Patients with classic type 1 diabetes with acute ketotic presentation or continuous requirement of insulin within 1 year of diagnosis were excluded. The controls consisted of 1584 subjects with normal glucose tolerance (FPG of  $< 6.1$  mmol/L). A total of 608 of these subjects was recruited either from the general population participating in a community-based screening program for cardiovascular risk or from hospital staff; an additional 976 subjects were recruited from a population-based cardiovascular risk-screening program for adolescents<sup>13</sup>. Informed consent was obtained from each participating subject. This study was approved by the Clinical Research Ethics Committee of the Chinese University of Hong Kong.

## MEMBERS OF THE DIAGRAM CONSORTIUM

Benjamin F Voight<sup>1,2,3</sup>, Laura J Scott<sup>4</sup>, Valgerdur Steinthorsdottir<sup>5</sup>, Andrew P Morris<sup>6</sup>, Christian Dina<sup>7,8</sup>, Ryan P Welch<sup>9</sup>, Eleftheria Zeggini<sup>6,10</sup>, Cornelia Huth<sup>11,12</sup>, Yurii S Aulchenko<sup>13</sup>, Gudmar Thorleifsson<sup>5</sup>, Laura J McCulloch<sup>14</sup>, Teresa Ferreira<sup>6</sup>, Harald Grallert<sup>11,12</sup>, Najaf Amin<sup>13</sup>, Guanming Wu<sup>15</sup>, Cristen J Willer<sup>4</sup>, Soumya Raychaudhuri<sup>1,2,16</sup>, Steve A McCarroll<sup>1,17</sup>, Claudia Langenberg<sup>18</sup>, Oliver M Hofmann<sup>19</sup>, Josée Dupuis<sup>20,21</sup>, Lu Qi<sup>22-24</sup>, Ayellet V Segre<sup>1,2,17</sup>, Mandy van Hoek<sup>25</sup>, Pau Navarro<sup>26</sup>, Kristin Ardlie<sup>1</sup>, Beverley Balkau<sup>27,28</sup>, Rafn Benediktsson<sup>29,30</sup>, Amanda J Bennett<sup>14</sup>, Roza Blagieva<sup>31</sup>, Eric Boerwinkle<sup>32</sup>, Lori L Bonnycastle<sup>33</sup>, Kristina Bengtsson Boström<sup>34</sup>, Bert Bravenboer<sup>35</sup>, Suzannah Bumpstead<sup>10</sup>, Noël P Burt<sup>1</sup>, Guillaume Charpentier<sup>36</sup>, Peter S Chines<sup>33</sup>, Marilyn Cornelis<sup>24</sup>, David J Couper<sup>37</sup>, Gabe Crawford<sup>1</sup>, Alex SF Doney<sup>38,39</sup>, Katherine S Elliott<sup>6</sup>, Amanda L Elliott<sup>1,17,40</sup>, Michael R Erdos<sup>33</sup>, Caroline S Fox<sup>21,41</sup>, Christopher S Franklin<sup>42</sup>, Martha Ganser<sup>4</sup>, Christian Gieger<sup>11</sup>, Niels Grarup<sup>43</sup>, Todd Green<sup>1,2</sup>, Simon Griffin<sup>18</sup>, Christopher J Groves<sup>14</sup>, Candace Guiducci<sup>1</sup>, Samy Hadjadj<sup>44</sup>, Neelam Hassanali<sup>14</sup>, Christian Herder<sup>45</sup>, Bo Isomaa<sup>46,47</sup>, Anne U Jackson<sup>4</sup>, Paul RV Johnson<sup>48</sup>, Torben Jørgensen<sup>49,50</sup>, Wen HL Kao<sup>51,52</sup>, Norman Klopp<sup>11</sup>, Augustine Kong<sup>5</sup>, Peter Kraft<sup>22,23</sup>, Johanna Kuusisto<sup>53</sup>, Torsten Lauritzen<sup>54</sup>, Man Li<sup>51</sup>, Aloysius Lieveise<sup>55</sup>, Cecilia M Lindgren<sup>6</sup>, Valeriya Lyssenko<sup>56</sup>, Michel Marre<sup>57,58</sup>, Thomas Meitinger<sup>59,60</sup>, Kristian Midthjell<sup>61</sup>, Mario A Morken<sup>33</sup>, Narisu Narisu<sup>33</sup>, Peter Nilsson<sup>56</sup>, Katharine R Owen<sup>14</sup>, Felicity Payne<sup>10</sup>, John RB Perry<sup>62,63</sup>, Ann-Kristin Petersen<sup>11</sup>, Carl Platou<sup>61</sup>, Christine Proença<sup>7</sup>, Inga Prokopenko<sup>6,14</sup>, Wolfgang Rathmann<sup>64</sup>, N William Rayner<sup>6,14</sup>, Neil R Robertson<sup>6,14</sup>, Ghislain Rocheleau<sup>65-67</sup>, Michael Roden<sup>45,68</sup>, Michael J Sampson<sup>69</sup>, Richa Saxena<sup>1,2,40</sup>, Beverley M Shields<sup>62,63</sup>, Peter Shrader<sup>3,70</sup>, Gunnar Sigurdsson<sup>29,30</sup>, Thomas Sparsø<sup>43</sup>, Klaus Strassburger<sup>64</sup>, Heather M Stringham<sup>4</sup>, Qi Sun<sup>22,23</sup>, Amy J Swift<sup>33</sup>, Barbara Thorand<sup>11</sup>, Jean Tichet<sup>71</sup>, Tiinamaija Tuomi<sup>46,72</sup>, Rob M van Dam<sup>24</sup>, Timon W van Haften<sup>73</sup>, Thijs van Herpt<sup>25,55</sup>, Jana V van Vliet-Ostapchouk<sup>74</sup>, G Bragi Walters<sup>5</sup>, Michael N Weedon<sup>62,63</sup>, Cisca Wijmenga<sup>75</sup>, Jacqueline Witteman<sup>13</sup>, Richard N Bergman<sup>76</sup>, Stephane Cauchi<sup>7</sup>, Francis S Collins<sup>77</sup>, Anna L Gloyn<sup>14</sup>, Ulf Gyllensten<sup>78</sup>, Torben Hansen<sup>43,79</sup>, Winston A Hide<sup>19</sup>, Graham A Hitman<sup>80</sup>, Albert Hofman<sup>13</sup>, David J Hunter<sup>22,23</sup>, Kristian Hveem<sup>61,81</sup>, Markku Laakso<sup>53</sup>, Karen L Mohlke<sup>82</sup>, Andrew D Morris<sup>38,39</sup>, Colin NA Palmer<sup>38,39</sup>, Peter P Pramstaller<sup>83</sup>, Igor Rudan<sup>42,84,85</sup>, Eric Sijbrands<sup>25</sup>, Lincoln D Stein<sup>15</sup>, Jaakko Tuomilehto<sup>86</sup>, Andre Uitterlinden<sup>25</sup>, Mark Walker<sup>87</sup>, Nicholas J Wareham<sup>18</sup>, Richard M Watanabe<sup>76,88</sup>, Goncalo R Abecasis<sup>4</sup>, Bernhard O Boehm<sup>31</sup>, Harry Campbell<sup>42</sup>, Mark J Daly<sup>1,2</sup>, Andrew T Hattersley<sup>62,63</sup>, Frank B Hu<sup>22-24</sup>, James B Meigs<sup>3,70</sup>, James S Pankow<sup>89</sup>, Oluf Pedersen<sup>43,90,91</sup>, H.-Erich Wichmann<sup>11,12,92</sup>, Inês Barroso<sup>10</sup>, Jose C Florez<sup>1,2,3,93</sup>, Timothy M Frayling<sup>62,63</sup>, Leif Groop<sup>56,72</sup>, Rob Sladek<sup>65-67</sup>, Unnur Thorsteinsdottir<sup>5,94</sup>, James F Wilson<sup>42</sup>, Thomas Illig<sup>11</sup>, Philippe Froguel<sup>7,95</sup>, Cornelia M van Duijn<sup>13</sup>, Kari Stefansson<sup>5,94</sup>, David Altshuler<sup>1,2,3,17,40,93</sup>, Michael Boehnke<sup>4</sup>, Mark I McCarthy<sup>6,14,96</sup>.

### Affiliations

1. Broad Institute of Harvard and Massachusetts Institute of Technology (MIT), Cambridge, Massachusetts 02142, USA
2. Center for Human Genetic Research, Massachusetts General Hospital, 185 Cambridge Street, Boston, Massachusetts 02114, USA
3. Department of Medicine, Harvard Medical School, Boston, Massachusetts 02115, USA
4. Department of Biostatistics, University of Michigan, Ann Arbor, Michigan 48109-2029, USA
5. deCODE Genetics, 101 Reykjavik, Iceland
6. Wellcome Trust Centre for Human Genetics, University of Oxford, Oxford, OX3 7BN, UK
7. CNRS-UMR-8090, Institute of Biology and Lille 2 University, Pasteur Institute, F-59019 Lille, France

8. INSERM UMR915 CNRS ERL3147 F-44007 Nantes, France
9. Bioinformatics Program, University of Michigan, Ann Arbor MI USA 48109
10. Wellcome Trust Sanger Institute, Hinxton, CB10 1HH, UK
11. Institute of Epidemiology, Helmholtz Zentrum Muenchen, 85764 Neuherberg, Germany
12. Institute of Medical Informatics, Biometry and Epidemiology, Ludwig-Maximilians-Universität, 81377 Munich, Germany
13. Department of Epidemiology, Erasmus University Medical Center, P.O. Box 2040, 3000 CA Rotterdam, The Netherlands.
14. Oxford Centre for Diabetes, Endocrinology and Metabolism, University of Oxford, OX3 7LJ, UK
15. Ontario Institute for Cancer Research, 101 College Street, Suite 800, Toronto, Ontario M5G 0A3, Canada
16. Division of Rheumatology, Immunology and Allergy, Brigham and Women's Hospital, Harvard Medical School, Boston, Massachusetts 02115, USA
17. Department of Molecular Biology, Harvard Medical School, Boston, Massachusetts 02115, USA
18. MRC Epidemiology Unit, Institute of Metabolic Science, Addenbrooke's Hospital, Cambridge CB2 0QQ, UK
19. Department of Biostatistics, Harvard School of Public Health, Boston, Massachusetts 02115, USA
20. Department of Biostatistics, Boston University School of Public Health, Boston, Massachusetts 02118, USA
21. National Heart, Lung, and Blood Institute's Framingham Heart Study, Framingham, Massachusetts 01702, USA
22. Department of Nutrition, Harvard School of Public Health, 665 Huntington Ave, Boston, MA 02115, USA
23. Department of Epidemiology, Harvard School of Public Health, 665 Huntington Ave, Boston, MA 02115, USA
24. Channing Laboratory, Dept. of Medicine, Brigham and Women's Hospital and Harvard Medical School, 181 Longwood Ave, Boston, MA 02115, USA
25. Department of Internal Medicine, Erasmus University Medical Centre, PO-Box 2040, 3000 CA Rotterdam, The Netherlands
26. MRC Human Genetics Unit, Institute of Genetics and Molecular Medicine, Western General Hospital, Edinburgh, EH4 2XU, UK
27. INSERM U780, F-94807 Villejuif, France
28. University Paris-Sud, F-91405 Orsay, France
29. Landspítali University Hospital, 101 Reykjavik, Iceland
30. Icelandic Heart Association, 201 Kopavogur, Iceland
31. Division of Endocrinology, Diabetes and Metabolism, Ulm University, 89081 Ulm, Germany
32. The Human Genetics Center and Institute of Molecular Medicine, University of Texas Health Science Center, Houston, Texas 77030, USA
33. National Human Genome Research Institute, National Institute of Health, Bethesda, Maryland 20892, USA
34. R&D Centre, Skaraborg Primary Care, 541 30 Skövde, Sweden
35. Department of Internal Medicine, Catharina Hospital, PO-Box 1350, 5602 ZA Eindhoven, The Netherlands
36. Endocrinology-Diabetology Unit, Corbeil-Essonnes Hospital, F-91100 Corbeil-Essonnes, France
37. Department of Biostatistics and Collaborative Studies Coordinating Center, University of North Carolina at Chapel Hill, Chapel Hill, North Carolina, 27599, USA
38. Diabetes Research Centre, Biomedical Research Institute, University of Dundee, Ninewells Hospital, Dundee DD1 9SY, UK
39. Pharmacogenomics Centre, Biomedical Research Institute, University of Dundee, Ninewells Hospital, Dundee DD1 9SY, UK
40. Department of Genetics, Harvard Medical School, Boston, Massachusetts 02115, USA
41. Division of Endocrinology, Diabetes, and Hypertension, Brigham and Women's Hospital, Harvard Medical School, Boston, Massachusetts 02115, USA
42. Centre for Population Health Sciences, University of Edinburgh, Teviot Place, Edinburgh, EH8 9AG, UK
43. Hagedorn Research Institute, DK-2820 Gentofte, Denmark
44. Centre Hospitalier Universitaire de Poitiers, Endocrinologie Diabetologie, CIC INSERM 0801, INSERM U927, Université de Poitiers, UFR, Médecine Pharmacie, 86021 Poitiers Cedex, France
45. Institute for Clinical Diabetology, German Diabetes Center, Leibniz Center for Diabetes Research at Heinrich Heine University Düsseldorf, 40225 Düsseldorf, Germany
46. Folkhälsan Research Center, FIN-00014 Helsinki, Finland
47. Malmska Municipal Health Center and Hospital, 68601 Jakobstad, Finland
48. Diabetes Research and Wellness Foundation Human Islet Isolation Facility and Oxford Islet Transplant Programme, University of Oxford, Old Road, Headington, Oxford, OX3 7LJ, UK



49. Research Centre for Prevention and Health, Glostrup University Hospital, DK-2600 Glostrup, Denmark
50. Faculty of Health Science, University of Copenhagen, 2200 Copenhagen, Denmark
51. Department of Epidemiology, Johns Hopkins University, Baltimore, Maryland 21287, USA
52. Department of Medicine, and Welch Center for Prevention, Epidemiology, and Clinical Research, Johns Hopkins University, Baltimore, Maryland 21287, USA
53. Department of Medicine, University of Kuopio and Kuopio University Hospital, FIN-70211 Kuopio, Finland
54. Department of General Medical Practice, University of Aarhus, DK-8000 Aarhus, Denmark
55. Department of Internal Medicine, Maxima MC, PO-Box 90052, 5600 PD Eindhoven, The Netherlands
56. Department of Clinical Sciences, Diabetes and Endocrinology Research Unit, University Hospital Malmö, Lund University, 205 02 Malmö, Sweden
57. Department of Endocrinology, Diabetology and Nutrition, Bichat-Claude Bernard University Hospital, Assistance Publique des Hôpitaux de Paris, 75870 Paris Cedex 18, France
58. INSERM U695, Université Paris 7, 75018 Paris, France
59. Institute of Human Genetics, Helmholtz Zentrum Muenchen, 85764 Neuherberg, Germany
60. Institute of Human Genetics, Klinikum rechts der Isar, Technische Universität München, 81675 Muenchen, Germany
61. Nord-Trøndelag Health Study (HUNT) Research Center, Department of Community Medicine and General Practice, Norwegian University of Science and Technology, NO-7491 Trondheim, Norway
62. Genetics of Complex Traits, Institute of Biomedical and Clinical Science, Peninsula Medical School, University of Exeter, Magdalen Road, Exeter EX1 2LU, UK
63. Diabetes Genetics, Institute of Biomedical and Clinical Science, Peninsula Medical School, University of Exeter, Barrack Road, Exeter EX2 5DW, UK
64. Institute of Biometrics and Epidemiology, German Diabetes Center, Leibniz Center for Diabetes Research at Heinrich Heine University Düsseldorf, 40225 Düsseldorf, Germany
65. Department of Human Genetics, McGill University, Montreal H3H 1P3, Canada
66. Department of Medicine, Faculty of Medicine, McGill University, Montreal, H3A 1A4, Canada
67. McGill University and Genome Quebec Innovation Centre, Montreal, H3A 1A4, Canada
68. Department of Metabolic Diseases, Heinrich Heine University Düsseldorf, 40225 Düsseldorf, Germany
69. Department of Endocrinology and Diabetes, Norfolk and Norwich University Hospital NHS Trust, Norwich, NR1 7UY, UK.
70. General Medicine Division, Massachusetts General Hospital, Boston, Massachusetts, USA
71. Institut interrégional pour la Santé (IRSA), F-37521 La Riche, France
72. Department of Medicine, Helsinki University Hospital, University of Helsinki, FIN-00290 Helsinki, Finland
73. Department of Internal Medicine, University Medical Center Utrecht, 3584 CG Utrecht, The Netherlands
74. Molecular Genetics, Medical Biology Section, Department of Pathology and Medical Biology, University Medical Center Groningen and University of Groningen, 9700 RB Groningen, The Netherlands
75. Department of Genetics, University Medical Center Groningen and University of Groningen, 9713 EX Groningen, The Netherlands
76. Department of Physiology and Biophysics, University of Southern California School of Medicine, Los Angeles, California 90033, USA
77. National Institute of Health, Bethesda, Maryland 20892, USA
78. Department of Genetics and Pathology, Rudbeck Laboratory, Uppsala University, S-751 85 Uppsala, Sweden.
79. University of Southern Denmark, DK-5230 Odense, Denmark
80. Centre for Diabetes, Barts and The London School of Medicine and Dentistry, Queen Mary University of London, London E1 2AT, UK
81. Department of Medicine, The Hospital of Levanger, N-7600 Levanger, Norway
82. Department of Genetics, University of North Carolina, Chapel Hill, North Carolina 27599, USA
83. Institute of Genetic Medicine, European Academy Bozen/Bolzano (EURAC), Viale Druso 1, 39100 Bolzano, Italy
84. Croatian Centre for Global Health, Faculty of Medicine, University of Split, Soltanska 2, 21000 Split, Croatia
85. Institute for Clinical Medical Research, University Hospital "Sestre Milosrdnice", Vinogradska 29, 10000 Zagreb, Croatia
86. Department of Chronic Disease Prevention, National Institute for Health and Welfare, Helsinki FIN-00300, Finland,
87. Diabetes Research Group, Institute of Cellular Medicine, Newcastle University, Framlington Place, Newcastle upon Tyne NE2 4HH, UK

88. Department of Preventive Medicine, Keck Medical School, University of Southern California, Los Angeles, CA, 90089-9001, USA
89. Division of Epidemiology and Community Health, University of Minnesota, Minneapolis, Minnesota 55454, USA
90. Department of Biomedical Science, Panum, Faculty of Health Science, University of Copenhagen, 2200 Copenhagen, Denmark
91. Faculty of Health Science, University of Aarhus, DK-8000 Aarhus, Denmark
92. Klinikum Grosshadern, 81377 Munich, Germany
93. Diabetes Unit, Massachusetts General Hospital, Boston, Massachusetts 02144, USA
94. Faculty of Medicine, University of Iceland, 101 Reykjavik, Iceland
95. Genomic Medicine, Imperial College London, Hammersmith Hospital, W12 0NN, London, UK
96. Oxford National Institute for Health Research Biomedical Research Centre, Churchill Hospital, Old Road Headington, Oxford, OX3 7LJ, UK

## **MEMBERS OF THE MUTHER (Multiple Tissue Human Expression Resource) CONSORTIUM**

Kouros Ahmadi<sup>1</sup>, Chrysanthi Ainali<sup>2</sup>, Amy Barrett<sup>3</sup>, Veronique Bataille<sup>1</sup>, Jordana T. Bell<sup>1,3</sup>, Alfonso Buil<sup>4,§</sup>, Panos Deloukas<sup>5,¶</sup>, Emmanoil T. Dermitzakis<sup>4,¶</sup>, Antigone Dimas<sup>3,4</sup>, Richard Durbin<sup>5</sup>, Daniel Glass<sup>1</sup>, Elin Grundberg<sup>1,§</sup>, Christopher Hammond<sup>1</sup>, Neelam Hassanali<sup>3</sup>, Åsa K. Hedman<sup>3,§</sup>, Catherine Ingle<sup>5</sup>, David Knowles<sup>6</sup>, Maria Krestyaninova<sup>7</sup>, Cecilia Lindgren<sup>3</sup>, Chris Lowe<sup>8</sup>, Mark I. McCarthy<sup>3,9,10,¶</sup>, Paola di Meglio<sup>11</sup>, Stephen Montgomery<sup>4</sup>, Frank Nestle<sup>11</sup>, Alexandra C. Nica<sup>4,§</sup>, James Nisbet<sup>5</sup>, Stephen O’Rahilly<sup>8</sup>, Leopold Parts<sup>5</sup>, Simon Potter<sup>5</sup>, Magdalena Sekowska<sup>5</sup>, So-Youn Shin<sup>5</sup>, Kerrin S. Small<sup>1,5,§</sup>, Nicole Soranzo<sup>1,5</sup>, Tim D. Spector<sup>1,¶</sup>, Gabriela Surdulescu<sup>1</sup>, Mary Travers<sup>3</sup>, Sophia Tsoka<sup>2</sup>, Loukia Tsaprouni<sup>5</sup>, Alicja Wilk<sup>5</sup>, Tsun-Po Yang<sup>5</sup>, Krina T. Zondervan<sup>3</sup>

**§MuTHER Analysis Team**

**¶MuTHER Principal Investigators**

### **Affiliations**

1. Department of Twin Research and Genetic Epidemiology, King's College London, London, UK
2. Centre for Bioinformatics, School of Physical Sciences & Engineering, Kings College London, UK
3. Wellcome Trust Centre for Human Genetics, University of Oxford, Oxford, UK.
4. Department of Genetic Medicine and Development, University of Geneva Medical School, Geneva, Switzerland
5. Wellcome Trust Sanger Institute, Wellcome Trust Genome Campus, Hinxton, UK
6. University of Cambridge, Cambridge, UK
7. European Bioinformatics Institute, Hinxton, UK
8. University of Cambridge Metabolic Research Labs, Institute of Metabolic Science Addenbrooke’s Hospital Cambridge, UK
9. Oxford Centre for Diabetes, Endocrinology & Metabolism, University of Oxford, Churchill Hospital, Oxford, UK
10. Oxford NIHR Biomedical Research Centre, Churchill Hospital, Oxford, UK
11. St. John’s Institute of Dermatology, King’s College London, London, UK

## REFERENCES

1. Shu, X.O. et al. Identification of new genetic risk variants for type 2 diabetes. *PLoS Genet* **6**(2010).
2. Zheng, W. et al. The Shanghai Women's Health Study: rationale, study design, and baseline characteristics. *Am J Epidemiol* **162**, 1123-31 (2005).
3. Zheng, W. et al. Genome-wide association study identifies a new breast cancer susceptibility locus at 6q25.1. *Nat Genet* **41**, 324-8 (2009).
4. Tsai, F.J. et al. A genome-wide association study identifies susceptibility variants for type 2 diabetes in Han Chinese. *PLoS Genet* **6**, e1000847 (2010).
5. Kumar, G., Sng, B.L. & Kumar, S. Correlation of capillary and venous blood glucometry with laboratory determination. *Prehosp Emerg Care* **8**, 378-83 (2004).
6. Unoki, H. et al. SNPs in KCNQ1 are associated with susceptibility to type 2 diabetes in East Asian and European populations. *Nat Genet* **40**, 1098-102 (2008).
7. Nanri, A. et al. Dietary patterns and C-reactive protein in Japanese men and women. *Am J Clin Nutr* **87**, 1488-96 (2008).
8. Jia, W.P. et al. Epidemiological characteristics of diabetes mellitus and impaired glucose regulation in a Chinese adult population: the Shanghai Diabetes Studies, a cross-sectional 3-year follow-up study in Shanghai urban communities. *Diabetologia* **50**, 286-92 (2007).
9. Bao, Y. et al. Glycated haemoglobin A1c for diagnosing diabetes in Chinese population: cross sectional epidemiological survey. *BMJ* **340**, c2249 (2010).
10. Hu, C. et al. Association of genetic variants of NOS1AP with type 2 diabetes in a Chinese population. *Diabetologia* **53**, 290-8 (2010).
11. Steinthorsdottir, V. et al. A variant in CDKAL1 influences insulin response and risk of type 2 diabetes. *Nat Genet* **39**, 770-5 (2007).
12. Yang, X. et al. Development and validation of stroke risk equation for Hong Kong Chinese patients with type 2 diabetes: the Hong Kong Diabetes Registry. *Diabetes Care* **30**, 65-70 (2007).
13. Ozaki, R. et al. Overweight, family history of diabetes and attending schools of lower academic grading are independent predictors for metabolic syndrome in Hong Kong Chinese adolescents. *Arch Dis Child* **92**, 224-8 (2007).
14. Zeggini, E. et al. Meta-analysis of genome-wide association data and large-scale replication identifies additional susceptibility loci for type 2 diabetes. *Nat Genet* **40**, 638-45 (2008).
15. Dupuis, J. et al. New genetic loci implicated in fasting glucose homeostasis and their impact on type 2 diabetes risk. *Nat Genet* **42**, 105-16 (2010).
16. Voight, B.F. et al. Twelve type 2 diabetes susceptibility loci identified through large-scale association analysis. *Nat Genet* **42**, 579-89 (2010).
17. Qi, L. et al. Genetic variants at 2q24 are associated with susceptibility to type 2 diabetes.

- Hum Mol Genet* **19**, 2706-15 (2010).
18. Rung, J. et al. Genetic variant near IRS1 is associated with type 2 diabetes, insulin resistance and hyperinsulinemia. *Nat Genet* **41**, 1110-5 (2009).
  19. Saxena, R. et al. Genome-wide association analysis identifies loci for type 2 diabetes and triglyceride levels. *Science* **316**, 1331-6 (2007).
  20. Yamauchi, T. et al. A genome-wide association study in the Japanese population identifies susceptibility loci for type 2 diabetes at UBE2E2 and C2CD4A-C2CD4B. *Nat Genet* **42**, 864-8.
  21. Sandhu, M.S. et al. Common variants in WFS1 confer risk of type 2 diabetes. *Nat Genet* **39**, 951-3 (2007).
  22. Scott, L.J. et al. A genome-wide association study of type 2 diabetes in Finns detects multiple susceptibility variants. *Science* **316**, 1341-5 (2007).
  23. Sladek, R. et al. A genome-wide association study identifies novel risk loci for type 2 diabetes. *Nature* **445**, 881-5 (2007).
  24. Yasuda, K. et al. Variants in KCNQ1 are associated with susceptibility to type 2 diabetes mellitus. *Nat Genet* **40**, 1092-7 (2008).
  25. Kong, A. et al. Parental origin of sequence variants associated with complex diseases. *Nature* **462**, 868-74 (2009).
  26. Zeggini, E. et al. Replication of genome-wide association signals in UK samples reveals risk loci for type 2 diabetes. *Science* **316**, 1336-41 (2007).
  27. Frayling, T.M. et al. A common variant in the FTO gene is associated with body mass index and predisposes to childhood and adult obesity. *Science* **316**, 889-94 (2007).
  28. Genome-wide association study of 14,000 cases of seven common diseases and 3,000 shared controls. *Nature* **447**, 661-78 (2007).
  29. Desai, M. et al. The variable number of tandem repeats upstream of the insulin gene is a susceptibility locus for latent autoimmune diabetes in adults. *Diabetes* **55**, 1890-4 (2006).
  30. Desai, M. et al. An association analysis of the HLA gene region in latent autoimmune diabetes in adults. *Diabetologia* **50**, 68-73 (2007).
  31. Haller, K. et al. Insulin gene VNTR, CTLA-4 +49A/G and HLA-DQB1 alleles distinguish latent autoimmune diabetes in adults from type 1 diabetes and from type 2 diabetes group. *Tissue Antigens* **69**, 121-7 (2007).
  32. Cervin, C. et al. Genetic similarities between latent autoimmune diabetes in adults, type 1 diabetes, and type 2 diabetes. *Diabetes* **57**, 1433-7 (2008).
  33. Barrett, J.C. et al. Genome-wide association study and meta-analysis find that over 40 loci affect risk of type 1 diabetes. *Nat Genet* **41**, 703-7 (2009).
  34. Nejentsev, S. et al. Localization of type 1 diabetes susceptibility to the MHC class I genes HLA-B and HLA-A. *Nature* **450**, 887-92 (2007).
  35. Howson, J.M., Walker, N.M., Smyth, D.J. & Todd, J.A. Analysis of 19 genes for association

with type I diabetes in the Type I Diabetes Genetics Consortium families. *Genes Immun* **10 Suppl 1**, S74-84 (2009).

36. Cooper, J.D. et al. Meta-analysis of genome-wide association study data identifies additional type 1 diabetes risk loci. *Nat Genet* **40**, 1399-401 (2008).

**Supplementary Table 1. Study cohort information.**

| Stage   | Representative | Study       | Ethnic group | Sample size |         |       | Study design                                                   |
|---------|----------------|-------------|--------------|-------------|---------|-------|----------------------------------------------------------------|
|         |                |             |              | case        | control | total |                                                                |
| Stage 1 | KNIH           | KARE        | Korean       | 1042        | 2943    | 3985  | Population-based, prospective                                  |
|         |                | SDCS/SP2(1) | Chinese      | 1082        | 1006    | 2088  | Case-control multicenter                                       |
|         | NUS/SERI       | SDCS/SP2(2) | Chinese      | 928         | 939     | 1867  | Case-control multicenter                                       |
|         |                | SIMES       | Malay        | 794         | 1240    | 2034  | Population-based, prospective                                  |
|         | NCGM           | CAGE        | Japanese     | 931         | 1404    | 2335  | Case-control multicenter                                       |
|         | VU/SCI         | SDGS        | Chinese      | 1019        | 1710    | 2729  | Population-based                                               |
|         | SINICA         | TDS         | Chinese      | 997         | 999     | 1996  | Case-control                                                   |
|         | UNC            | CLHNS       | Filipino     | 159         | 1624    | 1783  | Population-based                                               |
| total   |                |             | 6952         | 11865       | 18817   |       |                                                                |
| Stage 2 | RIKEN/UT       | BBJ         | Japanese     | 4470        | 3071    | 7541  | Case-control multicenter                                       |
|         | KNIH           | H2T2DS      | Korean       | 1183        | 1305    | 2488  | Population-based                                               |
|         | SJTU           | SJTUDS      | Chinese      | 190         | 198     | 388   | Case-control                                                   |
|         | total          |             |              | 5843        | 4574    | 10417 |                                                                |
| Stage 3 | NCGM           | CAGE        | Japanese     | 5253        | 5903    | 11156 | Population-based, prospective, part of cases from BBJ          |
|         | SJTU           | SDIID/SDS   | Chinese      | 3410        | 3412    | 6822  | SDIID: case-control, SDS: community-based                      |
|         | CUHK           | CUHKDS      | Chinese      | 1477        | 1584    | 3061  | Case-control                                                   |
|         | NTUH           | NTUHDS      | Chinese      | 1512        | 1512    | 3024  | Case-control                                                   |
|         | SNUH           | SNUHDS      | Korean       | 632         | 761     | 1393  | Case-control                                                   |
|         | total          |             |              | 12284       | 13172   | 25456 |                                                                |
| Overall | AGEN           | AGEN-T2D    | East Asian   | 25079       | 29611   | 54690 | 3 stage design study for genome-wide association meta-analysis |

KNIH, Korea National Institute of Health; NUS, National University of Singapore; SERI, Singapore Eye Research Institute; NCGM, National Center for Global Health and Medicine; VU, Vanderbilt University; SCI, Shanghai Cancer Institute; SINICA, Academia Sinica; UNC, University of North Carolina; UT, The University of Tokyo; SJTU, Shanghai Jiao Tong University; NTUH, National Taiwan University Hospital; SNUH, Seoul National University Hospital; KARE, Korea Association Resource Study; SDCS, Singapore Diabetes Cohort Study; SP2, Singapore Prospective Study Program; SIMES, Singapore Malay Eye Study; CAGE, Cardiometabolic Genome Epidemiology Network; SDGS, Shanghai Diabetes Genetic Study; TDS, Taiwan T2D Study; CLHNS, Cebu Longitudinal Health and Nutrition Survey; BBJ, BioBank Japan; H2T2DS, Health2 T2D Study; SJTUDS, Shanghai Jiao Tong University Diabetes Study; SDIID, Shanghai Diabetes Institute Inpatient Database; SDS, Shanghai Diabetes Study; CUHKDS, Chinese University of Hong Kong Diabetes Study; NTUHDS, National Taiwan University Hospital Diabetes Study; SNUHDS, Seoul National University Hospital Diabetes Study; AGEN, Asian Genetic Epidemiology Network

**Supplementary Table 2. Information of SNP genotyping and imputation for individual studies participating in one of three stages.**

| Stage   | Representative | Study       | Genotyping                    |                  | SNP imputation |                                              |                   | No of SNPs used for Stage 1 meta-analysis | GWAS inflation factor ( $\lambda_{GC}$ ) |
|---------|----------------|-------------|-------------------------------|------------------|----------------|----------------------------------------------|-------------------|-------------------------------------------|------------------------------------------|
|         |                |             | Platform                      | QC               | Method         | Reference panel                              | QC                |                                           |                                          |
| Stage 1 | KNIH           | KARE        | Affy 5.0                      | Call rate > 0.95 | IMPUTE V1.0    | HapMap build 36 release 22 (CHB+JPT)         | proper_info > 0.5 | 1419177                                   | 1.011                                    |
|         |                | SDCS/SP2(1) | Illumina610                   | Call rate > 0.95 | IMPUTE V0.5.0  | HapMap build 36 release 22 (CHB+JPT)         | proper_info > 0.5 | 1965414                                   | 1.054                                    |
|         | NUS/SERI       | SDCS/SP2(2) | Illumina1M                    | Call rate > 0.95 | IMPUTE V0.5.0  | HapMap build 36 release 22 (CHB+JPT)         | proper_info > 0.5 | 2248003                                   | 1.062                                    |
|         |                | Malay 610   | Illumina610                   | Call rate > 0.95 | IMPUTE V0.5.0  | HapMap build 36 release 22 (CHB+JPT+CEU+YRI) | proper_info > 0.5 | 1625733                                   | 1.035                                    |
|         | NCGM           | CAGE        | Illumina Human 550 and 610    | Call rate > 0.95 | BEAGLE V3.0.4  | HapMap build 36 release 24 (CHB+JPT)         | Rsqr > 0.3        | 1988685                                   | 1.057                                    |
|         | VU             | SDGS        | Affy 6.0                      | Call rate > 0.95 | MACH           | HapMap build 36 release 23a (CHB+JPT)        | Rsqr > 0.3        | 2241970                                   | 1.041                                    |
|         | SINICA         | TDS         | Illumina Human 550            | Call rate > 0.95 | MACH           | HapMap build 36 release 22 (CHB+JPT)         | Rsqr > 0.3        | 1890143                                   | 1.043                                    |
|         | UNC            | CLHNS       | Affy 5.0                      | Call rate > 0.95 | MACH           | HapMap build 36 release 21 (CHB+JPT+CEU)     | Rsqr > 0.3        | 2049920                                   | 1.005                                    |
| Stage 2 | RIKEN/Tokyo U  | BBJ         | Illumina Human 550 and 610    | Call rate > 0.95 | MACH           | HapMap build 36 release 24 (CHB+JPT)         | Rsqr > 0.3        | na                                        | na                                       |
|         | KNIH           | H2T2DS      | Affy 6.0                      | Call rate > 0.95 | IMPUTE V1.0    | HapMap build 36 release 22 (CHB+JPT)         | proper_info > 0.5 | na                                        | na                                       |
|         | SJTU           | SJTUDS      | Illumina Human CNV370DUO      | Call rate > 0.95 | IMPUTE V1.0    | HapMap build 36 release 22 (CHB+JPT)         | proper_info > 0.5 | na                                        | na                                       |
| Stage 3 | NCGM           | CAGE        | TaqMan                        | Call rate > 0.99 | na             | na                                           | na                | na                                        | na                                       |
|         | SJTU           | SDIID/SDS   | Sequenom MassARRAY and TaqMan | Call rate > 0.99 | na             | na                                           | na                | na                                        | na                                       |
|         | CUHK           | CUHK        | Sequenom MassARRAY            | Call rate > 0.98 | na             | na                                           | na                | na                                        | na                                       |
|         | NTUH           | NTUH        | TaqMan and Beckman SNP Stream | Call rate > 0.98 | na             | na                                           | na                | na                                        | na                                       |
|         | SNUH           | SNUH        | TaqMan                        | Call rate > 0.98 | na             | na                                           | na                | na                                        | na                                       |

na, not available; KNIH, Korea National Institute of Health; NUS, National University of Singapore; SERI, Singapore Eye Research Institute; NCGM, National Center for Global Health and Medicine; VU, Vanderbilt University; SCL, Shanghai Cancer Institute; SINICA, Academia Sinica; UNC, University of North Carolina; UT, The University of Tokyo; SJTU, Shanghai Jiao Tong University; NTUH, National Taiwan University Hospital; SNUH, Seoul National University Hospital; KARE, Korea Association Resource Study; SDCS, Singapore Diabetes Cohort Study; SP2, Singapore Prospective Study Program; SIMES, Singapore Malay Eye Study; CAGE, Cardiometabolic Genome Epidemiology Network; SDGS, Shanghai Diabetes Genetic Study; TDS, Taiwan T2D Study; CLHNS, Cebu Longitudinal Health and Nutrition Survey; BBJ, BioBank Japan; H2T2DS, Health2 T2D Study; SJTUDS, Shanghai Jiao Tong University Diabetes Study; SDIID, Shanghai Diabetes Institute Inpatient Database; SDS, Shanghai Diabetes Study; CUHKDS, Chinese University of Hong Kong Diabetes Study; NTUHDS, National Taiwan University Hospital Diabetes Study; SNUHDS, Seoul National University Hospital Diabetes Study; AGEN, Asian Genetic Epidemiology Network

Supplementary Table 3. Association results of stage 1 meta-analysis for established T2D loci

| no | Chr | SNP        | nearby gene           | Risk allele | Other allele | RAF (HapMap JPT/CHB) | Stage1 (GWA meta-analysis) |                  |          |          |                    | Reported effect  |                            |
|----|-----|------------|-----------------------|-------------|--------------|----------------------|----------------------------|------------------|----------|----------|--------------------|------------------|----------------------------|
|    |     |            |                       |             |              |                      | N                          | OR (CI)          | P-value  | hetero_p | power <sup>§</sup> | OR (CI)          | Reference                  |
| 1  | 1   | rs10923931 | NOTCH2                | t           | g            | 0.02                 | 18814                      | 1.05 (0.92-1.20) | 4.52E-03 | 0.31     | 0.10               | 1.13 (1.08-1.17) | Zeggini et al., 2008 (14)  |
| 2  | 1   | rs340874   | PROX1                 | c           | t            | 0.35                 | 14831                      | 1.08 (1.03-1.14) | 2.84E-03 | 0.39     | 0.88               | 1.07 (1.05-1.09) | Dupuis et al., 2010 (15)   |
| 3  | 2   | rs780094   | GCKR                  | c           | t            | 0.42                 | 18813                      | 1.05 (1.01-1.10) | 2.04E-02 | 0.26     | 0.62               | 1.06 (1.04-1.08) | Dupuis et al., 2010 (15)   |
| 4  | 2   | rs7578597  | THADA                 | t           | c            | 1.00                 | 5989                       | 0.93 (0.62-1.40) | 7.37E-01 | 0.36     | NA                 | 1.15 (1.10-1.20) | Zeggini et al., 2008 (14)  |
| 5  | 2   | rs243021   | BCL11A                | a           | g            | 0.67                 | 18634                      | 1.05 (1.00-1.10) | 4.02E-02 | 0.79     | 0.57               | 1.08 (1.06-1.10) | Voight et al., 2010 (16)   |
| 6  | 2   | rs7593730  | RBMS1                 | c           | t            | 0.86                 | 18815                      | 1.03 (0.97-1.09) | 3.98E-01 | 0.05     | 0.16               | 1.11 (1.08-1.16) | Qi et al., 2010 (17)       |
| 7  | 2   | rs2943641  | IRS1                  | c           | t            | 0.92                 | 18817                      | 1.12 (1.03-1.22) | 1.11E-02 | 0.53     | 0.80               | 1.19 (1.13-1.25) | Rung et al., 2009 (18)     |
| 8  | 3   | rs1801282  | PPARG                 | c           | g            | 0.96                 | 16770                      | 1.13 (1.01-1.28) | 3.93E-02 | 0.86     | 0.53               | 1.14 (1.08-1.20) | Saxena et al., 2007 (19)   |
| 9  | 3   | rs6780569  | UBE2E2                | g           | a            | 0.78                 | 18765                      | 1.13 (1.07-1.20) | 2.00E-05 | 0.50     | 1.00               | 1.21 (1.14-1.30) | Yamauchi et al., 2010 (20) |
| 10 | 3   | rs4607103  | ADAMTS9               | c           | t            | 0.58                 | 18699                      | 0.99 (0.95-1.04) | 6.74E-01 | 0.74     | 0.08               | 1.09 (1.06-1.12) | Zeggini et al., 2008 (14)  |
| 11 | 3   | rs11708067 | ADCY5                 | a           | g            | 0.99                 | 5869                       | 1.18 (0.80-1.74) | 4.04E-01 | 0.74     | 0.09               | 1.12 (1.09-1.15) | Dupuis et al., 2007 (15)   |
| 12 | 3   | rs1470579  | IGF2BP2               | c           | a            | 0.30                 | 18812                      | 1.13 (1.08-1.19) | 5.67E-07 | 0.38     | 1.00               | 1.17 (1.11-1.23) | Saxena et al., 2007 (19)   |
| 13 | 4   | rs10010131 | WFS1                  | g           | a            | 0.98                 | 18806                      | 1.00 (0.91-1.10) | 9.92E-01 | 0.08     | 0.05               | 1.11 (1.05-1.16) | Sandhu et al., 2007 (21)   |
| 14 | 5   | rs4457053  | ZBED3                 | g           | a            | 0.03                 | 5887                       | 1.00 (0.85-1.18) | 9.77E-01 | 0.62     | 0.05               | 1.08 (1.06-1.11) | Voight et al., 2010 (16)   |
| 15 | 6   | rs7754840  | CDKAL1                | c           | g            | 0.39                 | 18732                      | 1.20 (1.14-1.25) | 9.63E-15 | 0.11     | 1.00               | 1.12 (1.08-1.16) | Voight et al., 2010 (22)   |
| 16 | 7   | rs2191349  | DGKB                  | t           | g            | 0.72                 | 18645                      | 1.11 (1.05-1.16) | 4.31E-05 | 0.79     | 0.99               | 1.06 (1.04-1.08) | Dupuis et al., 2010 (15)   |
| 17 | 7   | rs864745   | JAZF1                 | t           | c            | 0.80                 | 18720                      | 1.06 (1.00-1.12) | 3.50E-02 | 0.61     | 0.59               | 1.10 (1.07-1.13) | Zeggini et al., 2008 (14)  |
| 18 | 7   | rs4607517  | GCK                   | a           | g            | 0.24                 | 16395                      | 1.03 (0.97-1.09) | 3.97E-01 | 0.32     | 0.20               | 1.07 (1.05-1.10) | Dupuis et al., 2010 (15)   |
| 19 | 7   | rs972283   | KLF14                 | g           | a            | 0.69                 | 10763                      | 0.99 (0.93-1.06) | 8.52E-01 | 0.44     | 0.06               | 1.07 (1.05-1.10) | Voight et al., 2010 (16)   |
| 20 | 8   | rs896854   | TP53INP1              | t           | c            | 0.24                 | 18630                      | 1.10 (1.02-1.12) | 9.05E-03 | 0.64     | 0.78               | 1.06 (1.04-1.09) | Voight et al., 2010 (16)   |
| 21 | 8   | rs13266634 | SLC30A8               | c           | t            | 0.54                 | 18680                      | 1.11 (1.06-1.16) | 9.42E-06 | 0.61     | 1.00               | 1.15 (1.12-1.19) | Sladek et al., 2007 (23)   |
| 22 | 9   | rs17584499 | PTPRD                 | t           | c            | 0.12                 | 13042                      | 1.09 (1.01-1.18) | 3.56E-02 | 0.02     | 0.62               | 1.57 (1.13-1.83) | Tsai et al., 2010 (4)      |
| 23 | 9   | rs10811661 | CDKN2A/B              | t           | c            | 0.58                 | 12815                      | 1.21 (1.14-1.28) | 6.04E-11 | 0.01     | 1.00               | 1.20 (1.14-1.25) | Scott et al., 2007 (22)    |
| 24 | 9   | rs13292136 | CHCHD9                | c           | t            | 0.89                 | 18781                      | 0.99 (0.92-1.07) | 8.84E-01 | 0.41     | 0.06               | 1.11 (1.07-1.15) | Voight et al., 2010 (16)   |
| 25 | 10  | rs10906115 | CDC123/CAMK1D         | a           | g            | 0.65                 | 18812                      | 1.09 (1.04-1.14) | 2.98E-04 | 0.00     | 0.97               | 1.13 (1.08-1.18) | Shu et al., 2010 (1)       |
| 26 | 10  | rs12779790 | CDC123/CAMK1D         | g           | a            | 0.13                 | 8843                       | 1.12 (1.02-1.23) | 1.31E-02 | 0.47     | 0.07               | 1.11 (1.07-1.14) | Zeggini et al., 2008 (14)  |
| 27 | 10  | rs1111875  | HHEX/IDE              | c           | t            | 0.37                 | 14831                      | 1.11 (1.06-1.18) | 8.74E-05 | 0.91     | 0.99               | 1.13 (1.09-1.17) | Scott et al., 2007 (22)    |
| 28 | 10  | rs7903146  | TCF7L2                | t           | c            | 0.02                 | 18816                      | 1.16 (1.02-1.31) | 2.50E-02 | 0.77     | 0.57               | 1.37 (1.31-1.43) | Scott et al., 2007 (22)    |
| 29 | 11  | rs231362   | KCNQ1                 | g           | a            | 0.85                 | 12357                      | 1.10 (1.00-1.20) | 3.93E-02 | 0.10     | 0.72               | 1.08 (1.06-1.10) | Voight et al., 2010 (16)   |
| 30 | 11  | rs2237892  | KCNQ1                 | c           | t            | 0.62                 | 14830                      | 1.17 (1.11-1.23) | 5.41E-09 | 0.01     | 1.00               | 1.40 (1.34-1.47) | Yasuda et al., 2008 (24)   |
| 31 | 11  | rs2334499  | INS/IGF2 <sup>¶</sup> | t           | c            | 0.81                 | NC                         | NC (NC-NC)       | NC       | NC       | NC                 | 1.35 (NA-NA)     | Kong et al., 2010 (25)     |
| 32 | 11  | rs5215     | KCNJ11                | c           | t            | 0.34                 | 18750                      | 1.13 (1.08-1.18) | 1.52E-07 | 0.49     | 1.00               | 1.14 (1.10-1.19) | Zeggini et al., 2007 (26)  |
| 33 | 11  | rs1552224  | CENTD2                | a           | c            | 0.93                 | 18743                      | 1.16 (1.06-1.27) | 1.58E-03 | 0.22     | 0.94               | 1.14 (1.11-1.17) | Voight et al., 2010 (16)   |
| 34 | 11  | rs10830963 | MTNR1B                | g           | c            | 0.48                 | 8710                       | 0.99 (0.93-1.06) | 8.64E-01 | 0.32     | 0.06               | 1.09 (1.06-1.12) | Dupuis et al., 2010 (15)   |
| 35 | 12  | rs1531343  | HMG2                  | c           | g            | 0.13                 | 18752                      | 1.06 (0.99-1.14) | 1.05E-01 | 0.45     | 0.47               | 1.10 (1.07-1.14) | Voight et al., 2010 (16)   |
| 36 | 12  | rs7961581  | TSPAN8/LGR5           | c           | t            | 0.20                 | 18687                      | 1.01 (0.95-1.06) | 8.49E-01 | 0.39     | 0.07               | 1.09 (1.06-1.12) | Zeggini et al., 2008 (14)  |
| 37 | 12  | rs7957197  | HNF1A                 | t           | a            | 1.00                 | NA                         | NA (NA-NA)       | NA       | NA       | NA                 | 1.07 (1.05-1.10) | Voight et al., 2010 (16)   |
| 38 | 13  | rs1359790  | SPRY2                 | g           | a            | 0.74                 | 18719                      | 1.02 (0.97-1.08) | 3.73E-01 | 0.00     | 0.13               | 1.15 (1.10-1.20) | Shu et al., 2010 (1)       |
| 39 | 15  | rs7172432  | C2CD4A-C2CD4B         | a           | g            | 0.60                 | 18650                      | 1.09 (1.04-1.15) | 1.44E-04 | 0.53     | 0.98               | 1.14 (1.09-1.20) | Yamauchi et al., 2010 (20) |
| 40 | 15  | rs11634397 | ZFAND6                | g           | a            | 0.07                 | 12753                      | 0.99 (0.90-1.09) | 8.29E-01 | 0.35     | 0.05               | 1.06 (1.04-1.08) | Voight et al., 2010 (16)   |
| 41 | 15  | rs8042680  | PRC1                  | a           | c            | 1.00                 | 5988                       | 1.64 (1.16-2.32) | 4.92E-03 | 0.69     | NA                 | 1.07 (1.05-1.09) | Voight et al., 2010 (16)   |
| 42 | 16  | rs9939609  | FTO                   | a           | t            | 0.14                 | 18807                      | 1.15 (1.08-1.22) | 6.85E-06 | 0.02     | 1.00               | 1.15 (1.09-1.23) | Frayling et al., 2007 (27) |
| 43 | 17  | rs391300   | SRR                   | c           | a            | 0.78                 | 14830                      | 1.03 (0.97-1.09) | 3.03E-01 | 0.01     | 0.18               | 1.28 (1.18-1.39) | Tsai et al., 2010 (4)      |
| 44 | 17  | rs4430796  | HNF1B (TCF2)          | g           | a            | 0.28                 | 10317                      | 1.11 (1.05-1.18) | 5.71E-04 | 0.08     | 0.93               | 1.14 (1.08-1.20) | Voight et al., 2010 (16)   |
| 45 | X   | rs5945326  | DUSP9                 | g           | a            | 0.61                 | NA                         | NA (NA-NA)       | NA       | NA       | NA                 | 1.27 (1.18-1.37) | Voight et al., 2010 (16)   |

<sup>§</sup>The power was estimated given the stage 1 sample sizes, stage 1 ORs, T2D prevalence of 10% and the risk allele frequency (RAF) in MapMap (JPT/CHB) for  $\alpha=0.05$ . <sup>¶</sup>A signal near *INS/IGF2* was identified by parental-origin-specific analyses of disease-susceptibility variants. The *PEPD* locus was described previously with suggestive evidence of association ( $P=1.4 \times 10^{-5}$ ). NA, not available; NC, not comparable.



Supplementary Table 4. 297 SNPs and their proxies taken forward to stage 2 in silico replication in three independent GWA studies. A total of 297 SNPs with P-value < 5 × 10<sup>-4</sup> were selected from stage 1 meta-analysis for T2D association.

| Locus No   | SNP        | Chr        | BP       | Candidate Gene | Allele e1 | Allele 2 | Stage1 (GWA meta-analysis) |            |         |          | Stage2 (in silico replication (BBJ+KNIH+SJTU)) |          |          |            | Combined (Stage1 + Stage2) |          |                  |          |          |            |         |          |                  |          |          |
|------------|------------|------------|----------|----------------|-----------|----------|----------------------------|------------|---------|----------|------------------------------------------------|----------|----------|------------|----------------------------|----------|------------------|----------|----------|------------|---------|----------|------------------|----------|----------|
|            |            |            |          |                |           |          | N                          | Effect (β) | SE      | P-value  | Effect direction                               | hetero_p | N        | Effect (β) | SE                         | P-value  | Effect direction | hetero_p | N        | Effect (β) | SE      | P-value  | Effect direction | hetero_p |          |
| 1          | rs11120894 | 1          | 7263431  | CAMTA1         | a         | c        | 16678                      | -0.0099    | 0.0244  | 1.96E-04 | ---+---                                        | 9.13E-01 | 10.292   | -0.0145    | 0.0285                     | 6.12E-01 | ++               | 5.35E-01 | 26970    | -0.0586    | 0.0185  | 1.57E-03 | --               | 4.17E-02 |          |
|            | rs12409413 | 1          | 7264693  | CAMTA1         | t         | c        | 18765                      | 0.0042     | 0.0228  | 5.22E-02 | +++----                                        | 1.30E-01 | 10.302   | 0.014      | 0.0284                     | 6.22E-01 | ++               | 6.33E-01 | 29067    | 0.0324     | 0.0178  | 6.87E-02 | ++               | 4.07E-01 |          |
|            | rs17036059 | 1          | 7265108  | CAMTA1         | t         | c        | 12408                      | 0.026      | 0.0261  | 1.22E-04 | +++----                                        | 1.12E-01 | 10.288   | 0.027      | 0.0284                     | 6.30E-01 | ++               | 6.42E-01 | 2668     | 0.0302     | 0.022   | 1.31E-01 | ++               | 2.13E-01 |          |
|            | rs9660884  | 1          | 7285368  | CAMTA1         | a         | c        | 14826                      | -0.0772    | 0.0256  | 2.55E-03 | ---+---                                        | 9.75E-01 | 10.244   | -0.0241    | 0.0286                     | 3.99E-01 | ++               | 7.10E-01 | 25070    | -0.0536    | 0.0191  | 4.97E-03 | --               | 1.67E-01 |          |
| 2          | rs170139   | 1          | 10767145 | ---            | t         | c        | 14832                      | -0.1178    | 0.0329  | 3.36E-04 | ---+---                                        | 0.90E-01 | 7874     | -0.0149    | 0.0432                     | 7.29E-01 | ++               | 6.42E-01 | 22706    | -0.0802    | 0.0262  | 2.20E-03 | --               | 5.76E-02 |          |
|            | rs4373781  | 1          | 28162818 | XKR8           | c         | g        | 13038                      | 0.0936     | 0.0301  | 1.87E-03 | +++----                                        | 8.80E-01 | 7487     | 0.015      | 0.0389                     | 7.00E-01 | ??               | 1.00E+00 | 20525    | 0.0642     | 0.0238  | 7.03E-03 | ++               | 1.10E-01 |          |
|            | rs12565238 | 1          | 28171933 | EYAS           | c         | g        | 14994                      | 0.0991     | 0.0286  | 5.41E-04 | +++----                                        | 8.00E-01 | 10361    | 0.0015     | 0.0335                     | 9.64E-01 | ++               | 7.51E-01 | 25355    | 0.058      | 0.0218  | 7.71E-03 | ++               | 2.67E-02 |          |
|            | rs9661788  | 1          | 28184037 | EYAS           | c         | g        | 17029                      | -0.0907    | 0.0269  | 7.41E-04 | ---+---                                        | 8.43E-01 | 10360    | -0.0012    | 0.0335                     | 9.71E-01 | ++               | 7.43E-01 | 27389    | -0.0566    | 0.021   | 8.01E-03 | --               | 3.72E-02 |          |
| 3          | rs10493035 | 1          | 28188048 | EYAS           | t         | c        | 14987                      | 0.0734     | 0.0286  | 1.04E-02 | +++----                                        | 1.63E-01 | 10360    | -0.002     | 0.0335                     | 9.52E-01 | ++               | 7.34E-01 | 25349    | 0.0416     | 0.0218  | 5.57E-02 | ++               | 8.69E-02 |          |
|            | rs7553480  | 1          | 28197067 | EYAS           | c         | g        | 14998                      | 0.0963     | 0.0286  | 7.65E-04 | +++----                                        | 7.94E-01 | 10361    | -0.0004    | 0.0335                     | 9.92E-01 | ++               | 7.27E-01 | 25359    | 0.0555     | 0.0218  | 1.07E-02 | ++               | 2.81E-02 |          |
|            | rs11247737 | 1          | 28204211 | EYAS           | c         | g        | 14998                      | 0.096      | 0.0286  | 7.87E-04 | +++----                                        | 7.93E-01 | 10361    | -0.0004    | 0.0335                     | 9.92E-01 | ++               | 7.27E-01 | 25359    | 0.0555     | 0.0218  | 1.09E-02 | ++               | 2.86E-02 |          |
|            | rs7545441  | 1          | 28207154 | EYAS           | a         | g        | 14998                      | 0.0963     | 0.0286  | 7.69E-04 | +++----                                        | 7.70E-01 | 10361    | -0.0004    | 0.0335                     | 9.92E-01 | ++               | 7.27E-01 | 25359    | 0.0555     | 0.0218  | 1.07E-02 | ++               | 2.81E-02 |          |
|            | rs12568186 | 1          | 28213930 | EYAS           | t         | c        | 14998                      | -0.0964    | 0.0286  | 7.57E-04 | ---+---                                        | 7.69E-01 | 10363    | -0.0002    | 0.0335                     | 9.94E-01 | ++               | 7.45E-01 | 25361    | -0.0558    | 0.0218  | 1.03E-02 | ++               | 2.90E-02 |          |
|            | rs17162928 | 1          | 28216105 | EYAS           | t         | c        | 14997                      | 0.1004     | 0.0286  | 4.48E-04 | +++----                                        | 8.00E-01 | 10363    | 0.0002     | 0.0335                     | 9.94E-01 | ++               | 7.43E-01 | 25360    | 0.0582     | 0.0218  | 7.50E-03 | ++               | 2.29E-02 |          |
|            | rs1578213  | 1          | 28222878 | EYAS           | t         | c        | 16956                      | 0.0951     | 0.0269  | 4.07E-04 | +++----                                        | 7.87E-01 | 10349    | -0.0005    | 0.0335                     | 9.89E-01 | ++               | 7.51E-01 | 27305    | -0.0576    | 0.021   | 6.01E-03 | ++               | 2.61E-02 |          |
|            | rs12561882 | 1          | 28224417 | EYAS           | a         | g        | 12662                      | -0.092     | 0.0311  | 3.14E-03 | ---+---                                        | 8.70E-01 | 10363    | -0.0002    | 0.0335                     | 9.94E-01 | ++               | 7.43E-01 | 23025    | -0.0495    | 0.0228  | 2.99E-02 | ++               | 4.46E-02 |          |
|            | rs2147025  | 1          | 28277281 | EYAS           | c         | g        | 14913                      | 0.0948     | 0.0287  | 9.46E-04 | +++----                                        | 8.11E-01 | 10355    | -0.0029    | 0.0334                     | 9.31E-01 | ++               | 8.14E-01 | 25268    | 0.0533     | 0.0218  | 1.43E-02 | ++               | 2.65E-02 |          |
|            | rs2311587  | 1          | 28289485 | EYAS           | a         | g        | 12884                      | 0.0667     | 0.0314  | 3.38E-02 | +++----                                        | 1.11E-01 | 10352    | 0.0027     | 0.0336                     | 9.36E-01 | ++               | 8.06E-01 | 23236    | 0.0369     | 0.0209  | 1.08E-01 | ++               | 1.64E-01 |          |
|            | 4          | rs12049416 | 1        | 47644665       | ---       | t        | c                          | 12781      | 0.0915  | 0.0431   | 3.38E-02                                       | +++----  | 3.11E-02 | 10329      | 0.0163                     | 0.0513   | 7.60E-01         | ++       | 8.22E-01 | 23110      | 0.0616  | 0.0335   | 6.55E-02         | ++       | 2.72E-01 |
|            |            | rs12021515 | 1        | 47645670       | ---       | a        | g                          | 14832      | 0.1466  | 0.0417   | 4.33E-04                                       | +++----  | 5.39E-01 | 10320      | 0.0149                     | 0.0431   | 7.18E-01         | ++       | 8.44E-01 | 25152      | 0.0801  | 0.0293   | 6.33E-02         | ++       | 2.48E-02 |
| 5          | rs3738317  | 1          | 47610448 | ---            | t         | g        | 14529                      | -0.0682    | 0.0395  | 8.39E-02 | ---+---                                        | 1.03E-01 | 9919     | -0.0186    | 0.0423                     | 6.30E-01 | ??               | 7.12E-01 | 24448    | -0.0451    | 0.0289  | 1.18E-01 | --               | 3.91E-01 |          |
|            | rs10749691 | 1          | 53741575 | GLIS1          | g         | t        | 10719                      | -0.1101    | 0.0331  | 8.86E-04 | +++----                                        | 8.46E-01 | 7487     | -0.02      | 0.0356                     | 5.32E-01 | ??               | 1.00E+00 | 18197    | 0.046      | 0.0236  | 5.10E-02 | ++               | 5.81E-03 |          |
|            | rs4753322  | 1          | 53748204 | GLIS1          | a         | g        | 12734                      | -0.1075    | 0.0299  | 3.18E-04 | ---+---                                        | 8.96E-01 | 7838     | 0.0259     | 0.0329                     | 4.31E-01 | ++               | 3.90E-01 | 20572    | 0.0472     | 0.0221  | 3.31E-02 | ++               | 2.69E-03 |          |
|            | rs58039    | 1          | 53748577 | GLIS1          | a         | g        | 12791                      | -0.1072    | 0.0295  | 2.73E-04 | ---+---                                        | 8.74E-01 | 7872     | 0.0286     | 0.0328                     | 3.83E-01 | ++               | 2.44E-01 | 20663    | 0.0465     | 0.0219  | 3.41E-02 | ++               | 2.08E-03 |          |
|            | rs2280511  | 1          | 53748776 | GLIS1          | t         | c        | 14831                      | 0.1081     | 0.0269  | 5.69E-05 | +++----                                        | 9.46E-01 | 7856     | -0.0259    | 0.0329                     | 4.31E-01 | ??               | 3.58E-01 | 22687    | -0.0544    | 0.0208  | 8.98E-03 | ++               | 1.62E-03 |          |
|            | rs527014   | 1          | 53749880 | GLIS1          | t         | c        | 14712                      | -0.1147    | 0.027   | 2.09E-05 | ---+---                                        | 9.71E-01 | 7487     | 0.014      | 0.0336                     | 6.77E-01 | ??               | 1.00E+00 | 22199    | -0.0642    | 0.021   | 2.29E-03 | ++               | 2.83E-03 |          |
|            | rs658480   | 1          | 53750707 | GLIS1          | a         | g        | 14827                      | -0.1123    | 0.0268  | 2.85E-05 | ---+---                                        | 9.65E-01 | 7485     | 0.012      | 0.0337                     | 7.22E-01 | ??               | 1.00E+00 | 22312    | -0.0641    | 0.021   | 2.29E-03 | ++               | 3.89E-03 |          |
|            | 6          | rs10493411 | 1        | 66799712       | SGP1      | c        | g                          | 6847       | -0.1372 | 0.0437   | 1.70E-03                                       | ???-?    | 7.04E-01 | 7855       | 0.0485                     | 0.0563   | 3.89E-01         | ??       | 8.71E-01 | 14702      | -0.0674 | 0.0345   | 5.10E-02         | ++       | 9.17E-03 |
|            |            | rs7547794  | 1        | 66804466       | SGP1      | a        | g                          | 16810      | 0.0832  | 0.0262   | 1.49E-03                                       | +++----  | 6.42E-02 | 10363      | 0.013                      | 0.0416   | 7.54E-01         | ++       | 1.06E-01 | 21713      | 0.0633  | 0.0222   | 4.32E-03         | ++       | 1.53E-01 |
|            |            | rs7547857  | 1        | 66804478       | SGP1      | a        | g                          | 16810      | 0.0832  | 0.0262   | 1.49E-03                                       | +++----  | 6.42E-02 | 10363      | 0.0238                     | 0.0416   | 6.56E-01         | ++       | 1.06E-01 | 21713      | 0.0662  | 0.0221   | 2.78E-03         | ++       | 2.25E-01 |
|            |            | rs7537440  | 1        | 66804495       | SGP1      | t        | g                          | 12835      | 0.1145  | 0.0297   | 1.15E-04                                       | +++----  | 1.25E-02 | 10353      | 0.0127                     | 0.0416   | 7.61E-01         | ++       | 1.30E-01 | 23188      | 0.0801  | 0.0242   | 9.16E-04         | ++       | 4.64E-02 |
|            |            | rs7535240  | 1        | 66804524       | SGP1      | t        | c                          | 18808      | -0.0808 | 0.0244   | 3.35E-04                                       | ---+---  | 8.96E-01 | 7838       | 0.0259                     | 0.0329   | 4.31E-01         | ++       | 1.84E-01 | 20617      | 0.0466  | 0.0207   | 6.86E-02         | ++       | 3.52E-01 |
| rs963140   |            | 1          | 66801614 | SGP1           | c         | g        | 18812                      | 0.0831     | 0.0243  | 6.42E-04 | +++----                                        | 8.06E-02 | 10363    | 0.0083     | 0.031                      | 7.90E-01 | ++               | 1.64E-01 | 29175    | 0.0546     | 0.0191  | 4.28E-03 | ++               | 5.76E-02 |          |
| rs11208910 |            | 1          | 66811462 | SGP1           | t         | c        | 16777                      | 0.0682     | 0.0258  | 8.32E-03 | +++----                                        | 1.07E-02 | 10363    | 0.028      | 0.0415                     | 4.99E-01 | ++               | 2.05E-01 | 27140    | 0.0507     | 0.0129  | 9.29E-03 | ++               | 4.11E-01 |          |
| rs1373909  |            | 1          | 66813463 | SGP1           | a         | g        | 18814                      | 0.0861     | 0.0244  | 4.08E-04 | +++----                                        | 5.19E-02 | 10361    | 0.021      | 0.0414                     | 6.13E-01 | ++               | 1.43E-01 | 29175    | 0.0693     | 0.021   | 9.75E-04 | ++               | 1.76E-01 |          |
| rs12039282 |            | 1          | 66830911 | SGP1           | a         | g        | 14355                      | -0.0502    | 0.0282  | 7.56E-02 | ---+---                                        | 2.08E-01 | 10246    | -0.0087    | 0.0317                     | 7.84E-01 | ++               | 5.71E-02 | 24601    | -0.0139    | 0.021   | 1.30E-01 | ++               | 3.28E-01 |          |
| rs12089116 |            | 1          | 66832234 | SGP1           | a         | g        | 16672                      | 0.0642     | 0.0262  | 1.41E-02 | +++----                                        | 1.83E-01 | 10241    | 0.0107     | 0.0316                     | 7.35E-01 | ++               | 4.58E-02 | 26913    | 0.0424     | 0.0202  | 3.55E-02 | ++               | 1.93E-01 |          |
| rs7530706  |            | 1          | 66835180 | SGP1           | a         | g        | 16677                      | -0.0618    | 0.0261  | 1.81E-02 | ---+---                                        | 1.91E-01 | 10242    | -0.0104    | 0.0317                     | 7.44E-01 | ++               | 4.52E-02 | 26919    | -0.0421    | 0.0201  | 4.17E-02 | ++               | 2.11E-01 |          |
| rs12023176 |            | 1          | 66836119 | SGP1           | c         | g        | 16376                      | 0.0689     | 0.0264  | 9.11E-03 | +++----                                        | 1.06E-02 | 10241    | 0.0082     | 0.0316                     | 7.96E-01 | ++               | 4.43E-02 | 26617    | 0.0359     | 0.0203  | 3.01E-01 | ++               | 1.40E-01 |          |
| 7          | rs277359   | 1          | 75056267 | ---            | a         | c        | 12470                      | 0.0725     | 0.0333  | 2.96E-02 | +++----                                        | 6.56E-03 | 10313    | -0.004     | 0.0345                     | 9.07E-01 | ++               | 3.21E-01 | 22783    | 0.056      | 0.024   | 1.37E-01 | ++               | 1.11E-01 |          |
|            | rs277355   | 1          | 75063372 | ---            | c         | g        | 14828                      | 0.0538     | 0.0296  | 6.89E-02 | +++----                                        | 1.60E-02 | 10346    | 0.0159     | 0.0331                     | 6.31E-01 | ++               | 6.43E-01 | 25174    | 0.0397     | 0.0221  | 9.39E-02 | ++               | 3.99E-01 |          |
|            | rs277354   | 1          | 75063661 | ---            | c         | g        | 14830                      | -0.0535    | 0.0293  | 6.94E-02 | ---+---                                        | 1.33E-02 | 10359    | -0.0104    | 0.0331                     | 7.52E-01 | ++               | 5.67E-01 | 25189    | -0.044     | 0.022   | 1.18E-01 | ++               | 3.31E-01 |          |
|            | rs1161851  | 1          | 75071370 | ---            | a         | g        | 14804                      | 0.0517     | 0.0293  | 7.72E-02 | +++----                                        | 1.12E-02 | 10349    | 0.0112     | 0.0331                     | 7.35E-01 | ++               | 5.48E-01 | 25153    | 0.0399     | 0.0219  | 1.22E-01 | ++               | 3.60E-01 |          |
|            | rs277367   | 1          | 75072906 | ---            | a         | g        | 14818                      | -0.0512    | 0.0292  | 7.96E-02 | ---+---                                        | 1.42E-02 | 10357    |            |                            |          |                  |          |          |            |         |          |                  |          |          |

|  |            |   |           |        |   |   |       |         |        |          |        |          |       |         |        |          |     |          |       |         |        |          |     |          |
|--|------------|---|-----------|--------|---|---|-------|---------|--------|----------|--------|----------|-------|---------|--------|----------|-----|----------|-------|---------|--------|----------|-----|----------|
|  | rs693737   | 1 | 93497512  | CCDC18 | a | g | 18779 | 0.0745  | 0.0237 | 1.70E-03 | +++++  | 3.90E-01 | 10338 | 0.0476  | 0.0293 | 1.04E-01 | +++ | 1.82E-01 | 29117 | 0.0639  | 0.0184 | 5.29E-04 | ++  | 4.75E-01 |
|  | rs2926558  | 1 | 93509143  | CCDC18 | t | c | 18811 | 0.0732  | 0.0237 | 2.02E-03 | +++++  | 3.79E-01 | 10362 | 0.0456  | 0.0293 | 1.24E-01 | +++ | 2.41E-01 | 29173 | 0.062   | 0.0184 | 7.99E-04 | ++  | 4.54E-01 |
|  | rs6541401  | 1 | 93511536  | CCDC18 | a | g | 18815 | 0.0737  | 0.0237 | 1.89E-03 | +++++  | 3.91E-01 | 10362 | 0.0436  | 0.0293 | 1.36E-01 | +++ | 2.29E-01 | 29177 | 0.0618  | 0.0184 | 7.99E-04 | ++  | 4.25E-01 |
|  | rs6541404  | 1 | 93516022  | CCDC18 | a | t | 18811 | -0.0226 | 0.0238 | 3.41E-01 | -----  | 2.33E-02 | 10283 | -0.1198 | 0.0319 | 1.71E-01 | --- | 5.71E-18 | 29094 | -0.0574 | 0.0191 | 2.64E-03 | --  | 1.46E-02 |
|  | rs2932581  | 1 | 93520121  |        | t | c | 18816 | 0.0712  | 0.0245 | 3.71E-03 | +++++  | 4.41E-01 | 10362 | 0.0383  | 0.031  | 2.02E-01 | +++ | 9.76E-02 | 29167 | 0.058   | 0.019  | 2.23E-03 | ++  | 4.29E-01 |
|  | rs9432681  | 1 | 93534844  |        | a | c | 18817 | -0.0739 | 0.0237 | 1.81E-03 | -----  | 4.02E-01 | 10354 | -0.0441 | 0.0219 | 1.32E-01 | --- | 2.62E-01 | 29167 | -0.0621 | 0.0184 | 7.49E-04 | ++  | 4.29E-01 |
|  | rs1164897  | 1 | 93542960  |        | c | g | 18816 | -0.0714 | 0.0245 | 3.62E-03 | -----  | 4.46E-01 | 10354 | -0.0347 | 0.0301 | 2.49E-01 | --- | 8.57E-02 | 29170 | -0.0568 | 0.019  | 2.81E-03 | --  | 3.44E-01 |
|  | rs6680107  | 1 | 93543468  |        | a | g | 18814 | -0.0745 | 0.0237 | 1.67E-03 | -----  | 4.15E-01 | 10354 | -0.0427 | 0.0293 | 1.44E-01 | --- | 2.50E-01 | 29168 | -0.0519 | 0.0184 | 7.78E-04 | ++  | 3.99E-01 |
|  | rs9432453  | 1 | 93544217  |        | a | g | 16434 | -0.0829 | 0.0256 | 1.20E-03 | -----? | 3.79E-01 | 10347 | -0.043  | 0.0293 | 1.42E-01 | --- | 2.41E-01 | 26781 | -0.0656 | 0.0193 | 6.64E-04 | ++  | 3.05E-01 |
|  | rs1000607  | 1 | 93544589  |        | c | g | 16482 | 0.0807  | 0.0255 | 1.59E-03 | +++++  | 4.29E-01 | 10354 | 0.0441  | 0.0293 | 1.32E-01 | +++ | 2.62E-01 | 26836 | 0.0649  | 0.0192 | 7.37E-04 | ++  | 3.46E-01 |
|  | rs4240666  | 1 | 93547400  |        | a | c | 18717 | -0.0754 | 0.0238 | 1.49E-03 | -----  | 3.47E-01 | 10311 | -0.0432 | 0.0293 | 1.40E-01 | --- | 2.25E-01 | 29028 | -0.0626 | 0.0185 | 7.02E-04 | ++  | 3.84E-01 |
|  | rs4000699  | 1 | 93552393  |        | t | c | 18813 | -0.074  | 0.0237 | 1.79E-03 | -----  | 4.08E-01 | 10362 | -0.0477 | 0.0292 | 1.03E-01 | --- | 1.69E-01 | 29175 | -0.0636 | 0.0184 | 5.53E-04 | ++  | 4.04E-01 |
|  | rs2031225  | 1 | 93559302  |        | a | g | 18817 | -0.0237 | 0.0237 | 3.19E-01 | -----  | 2.78E-02 | 10362 | -0.047  | 0.0292 | 1.08E-01 | --- | 1.64E-01 | 29179 | -0.0633 | 0.0184 | 7.33E-04 | --  | 5.36E-01 |
|  | rs2031226  | 1 | 93559352  |        | t | g | 16361 | -0.8002 | 0.0237 | 1.82E-03 | -----? | 3.68E-01 | 10353 | -0.0482 | 0.0292 | 9.96E-02 | --- | 1.55E-01 | 29174 | -0.0662 | 0.0193 | 5.97E-04 | --  | 4.11E-01 |
|  | rs7033310  | 1 | 93561328  |        | t | g | 18805 | 0.0741  | 0.0231 | 1.79E-03 | +++++  | 4.39E-01 | 10362 | 0.0465  | 0.0292 | 1.15E-01 | +++ | 3.72E-01 | 29166 | 0.0631  | 0.0184 | 6.01E-04 | ++  | 4.63E-01 |
|  | rs1256320  | 1 | 93563233  |        | c | g | 18812 | -0.0718 | 0.0245 | 3.40E-03 | -----  | 4.61E-01 | 10255 | -0.0373 | 0.0301 | 2.15E-01 | --- | 4.85E-02 | 29167 | -0.0581 | 0.019  | 2.25E-03 | ++  | 3.74E-01 |
|  | rs4847408  | 1 | 93564025  |        | c | g | 18814 | -0.0238 | 0.0237 | 3.15E-01 | -----  | 2.48E-02 | 10362 | -0.0477 | 0.0292 | 1.03E-01 | --- | 1.69E-01 | 29178 | -0.0383 | 0.0184 | 7.04E-04 | --  | 5.25E-01 |
|  | rs2391254  | 1 | 93567754  |        | a | t | 18793 | 0.0816  | 0.0238 | 3.17E-04 | +++++  | 5.26E-01 | 10360 | 0.0473  | 0.0295 | 1.09E-01 | +++ | 1.20E-01 | 29153 | 0.0681  | 0.0185 | 2.38E-04 | ++  | 3.66E-01 |
|  | rs1164908  | 1 | 93570979  |        | a | c | 18817 | 0.0716  | 0.0245 | 3.53E-03 | +++++  | 4.60E-01 | 10362 | 0.0427  | 0.03   | 1.54E-01 | +++ | 6.43E-02 | 29179 | 0.06    | 0.019  | 1.56E-03 | ++  | 3.64E-01 |
|  | rs942196   | 1 | 93574852  |        | a | t | 18810 | -0.0741 | 0.0237 | 1.76E-03 | -----  | 4.29E-01 | 10356 | -0.0487 | 0.0292 | 9.56E-02 | --- | 1.66E-01 | 29166 | -0.064  | 0.0184 | 5.04E-04 | ++  | 4.99E-01 |
|  | rs3767964  | 1 | 93588078  | DR1    | t | c | 16646 | 0.0765  | 0.0253 | 2.51E-03 | +++++  | 4.29E-01 | 10351 | 0.0595  | 0.029  | 4.01E-02 | +++ | 1.96E-01 | 29167 | 0.0692  | 0.0191 | 2.86E-04 | ++  | 6.59E-01 |
|  | rs1213376  | 1 | 93588888  | DR1    | a | g | 16645 | 0.0152  | 0.0253 | 5.49E-01 | +++++  | 9.50E-03 | 10351 | 0.059   | 0.029  | 4.17E-02 | +++ | 1.86E-01 | 26996 | 0.0341  | 0.0191 | 7.34E-02 | ++  | 2.55E-01 |
|  | rs4847240  | 1 | 93590534  | DR1    | a | g | 16644 | 0.0763  | 0.0253 | 2.58E-03 | +++++  | 2.21E-01 | 10351 | 0.0609  | 0.029  | 3.56E-02 | +++ | 2.07E-01 | 26995 | 0.0366  | 0.0191 | 2.59E-04 | ++  | 6.89E-01 |
|  | rs12044883 | 1 | 93593163  | DR1    | a | g | 12319 | -0.0908 | 0.0304 | 2.83E-03 | -----? | 1.53E-01 | 10330 | -0.0623 | 0.0292 | 3.80E-02 | --- | 1.29E-01 | 22649 | -0.076  | 0.0211 | 3.09E-04 | --- | 4.99E-01 |
|  | rs958332   | 1 | 93619228  | TFE2   | a | g | 14826 | 0.1018  | 0.0293 | 5.10E-04 | +++++  | 8.09E-01 | 10352 | 0.0136  | 0.0331 | 1.65E-01 | +++ | 7.33E-01 | 29151 | 0.0603  | 0.0213 | 4.67E-03 | ++  | 3.93E-01 |
|  | rs1289671  | 1 | 93621459  | TFE2   | a | g | 14828 | -0.1025 | 0.0293 | 4.65E-04 | -----  | 7.89E-01 | 10352 | -0.0124 | 0.031  | 2.90E-01 | --- | 8.65E-01 | 29180 | -0.0601 | 0.0213 | 4.81E-03 | ++  | 3.50E-01 |
|  | rs2801939  | 1 | 93623809  | TFE2   | a | g | 14829 | 0.1007  | 0.0293 | 6.01E-04 | +++++  | 8.53E-01 | 10338 | 0.009   | 0.0311 | 7.72E-01 | +++ | 7.44E-01 | 29167 | 0.0576  | 0.0209 | 1.83E-03 | ++  | 3.19E-01 |
|  | rs7540530  | 1 | 150057482 | RORC   | a | g | 14830 | 0.1001  | 0.0272 | 2.32E-04 | +++++  | 8.42E-01 | 7875  | 0.0463  | 0.0328 | 1.59E-01 | +++ | 6.25E-01 | 27205 | 0.0782  | 0.0209 | 1.19E-03 | ++  | 2.07E-01 |
|  | rs6693413  | 1 | 150058934 | RORC   | a | g | 14627 | 0.1004  | 0.0274 | 2.50E-04 | +++++  | 2.86E-01 | 7853  | -0.0445 | 0.0486 | 3.60E-01 | -?  | 9.77E-01 | 22480 | 0.0653  | 0.0239 | 6.10E-03 | ++  | 9.40E-03 |
|  | rs7531041  | 1 | 150061036 | RORC   | a | c | 630   | 0.0819  | 0.0524 | 1.18E-01 | +++++  | 7.77E-01 | 7840  | -0.062  | 0.0491 | 2.07E-01 | -?  | 9.55E-01 | 14150 | 0.0535  | 0.0388 | 8.83E-01 | ++  | 4.51E-02 |
|  | rs12036145 | 1 | 150062490 | RORC   | t | c | 4512  | 0.1017  | 0.0776 | 1.90E-01 | +++++  | 8.47E-01 | 7839  | -0.0508 | 0.0489 | 2.99E-01 | -?  | 9.43E-01 | 12351 | -0.0755 | 0.0414 | 8.57E-01 | ++  | 9.64E-02 |
|  | rs10917835 | 1 | 159983917 |        | a | t | 18681 | 0.0907  | 0.0253 | 3.40E-04 | +++++  | 7.83E-01 | 10319 | 0.0405  | 0.0377 | 2.83E-01 | +++ | 5.99E-01 | 29000 | 0.0701  | 0.021  | 3.50E-04 | ++  | 2.69E-01 |
|  | rs7519514  | 1 | 160005814 | ATF6   | a | g | 18808 | 0.0999  | 0.0242 | 3.68E-05 | +++++  | 7.25E-01 | 10363 | 0.0611  | 0.0292 | 3.62E-02 | +++ | 9.72E-01 | 29171 | 0.0841  | 0.0186 | 6.37E-06 | +++ | 3.06E-01 |
|  | rs9055959  | 1 | 160007898 | ATF6   | t | c | 18814 | 0.0879  | 0.0242 | 2.78E-04 | +++++  | 6.01E-01 | 10330 | 0.0615  | 0.0293 | 3.56E-02 | +++ | 9.82E-01 | 29144 | 0.0772  | 0.0187 | 6.37E-06 | +++ | 4.07E-01 |
|  | rs1027000  | 1 | 160023660 | ATF6   | t | c | 18663 | 0.1101  | 0.0266 | 3.47E-05 | +++++  | 3.64E-01 | 10350 | 0.0869  | 0.0331 | 9.97E-04 | +++ | 8.95E-01 | 29120 | 0.106   | 0.02   | 1.15E-07 | ++  | 8.77E-01 |
|  | rs11576878 | 1 | 160042201 | ATF6   | a | g | 16770 | 0.106   | 0.0266 | 6.59E-05 | +++++  | 4.22E-01 | 10358 | 0.101   | 0.0303 | 8.55E-04 | +++ | 9.04E-01 | 27128 | 0.1038  | 0.02   | 2.06E-07 | ++  | 9.01E-01 |
|  | rs1214697  | 1 | 160047603 | ATF6   | a | g | 18648 | -0.0891 | 0.0242 | 2.36E-04 | -----  | 4.20E-01 | 10287 | -0.0815 | 0.0334 | 1.46E-02 | --- | 5.89E-01 | 28935 | -0.0865 | 0.0196 | 1.02E-05 | ++  | 8.54E-01 |
|  | rs11581556 | 1 | 160060236 | ATF6   | a | g | 18798 | -0.0934 | 0.0253 | 2.18E-04 | -----  | 3.24E-01 | 10356 | -0.0987 | 0.0303 | 1.12E-03 | --- | 9.13E-01 | 29154 | -0.0956 | 0.0194 | 8.59E-07 | ++  | 8.93E-01 |
|  | rs1006310  | 1 | 160078179 | ATF6   | t | c | 18810 | 0.0967  | 0.0242 | 6.32E-05 | +++++  | 7.21E-01 | 10362 | 0.0144  | 0.0311 | 6.44E-01 | +++ | 6.82E-01 | 29172 | 0.0519  | 0.0191 | 5.86E-04 | ++  | 3.68E-02 |
|  | rs931778   | 1 | 160090242 | ATF6   | a | g | 18793 | 0.0968  | 0.0242 | 6.39E-05 | +++++  | 7.06E-01 | 10354 | 0.0087  | 0.0311 | 7.79E-01 | +++ | 6.12E-01 | 29147 | 0.0636  | 0.0191 | 7.83E-04 | ++  | 2.54E-02 |
|  | rs2340721  | 1 | 160116009 | ATF6   | a | c | 18800 | 0.0968  | 0.0242 | 6.30E-05 | +++++  | 7.10E-01 | 10356 | 0.01    | 0.0311 | 7.48E-01 | +++ | 6.37E-01 | 29156 | 0.0641  | 0.0191 | 9.76E-04 | ++  | 2.76E-02 |
|  | rs10918317 | 1 | 160129179 | ATF6   | a | g | 18792 | -0.0954 | 0.0243 | 8.52E-05 | -----  | 7.06E-01 | 10356 | 0.0032  | 0.0306 | 9.19E-01 | --- | 6.51E-01 | 29148 | -0.0573 | 0.019  | 2.62E-03 | ++  | 1.16E-02 |
|  | rs12124509 | 1 | 160134113 | ATF6   | a | g | 18790 | -0.0946 | 0.0243 | 9.19E-05 | -----  | 7.11E-01 | 10356 | 0.0039  | 0.0306 | 8.99E-01 | --- | 6.42E-01 | 29126 | -0.0565 | 0.019  | 2.98E-03 | ++  | 1.17E-02 |
|  | rs2247475  | 1 | 160145222 | ATF6   | a | g | 16305 | 0.0991  | 0.0259 | 1.29E-04 | +++++  | 2.89E-01 | 10322 | 0.0543  | 0.0446 | 2.24E-01 | +++ | 9.61E-01 | 26627 | 0.0878  | 0.0224 | 8.85E-05 | +++ | 3.85E-01 |
|  | rs4654121  | 1 | 160149707 | ATF6   | a | g | 18784 | -0.0938 | 0.0253 | 2.05E-04 | +++++  | 3.64E-01 | 10350 | -0.0989 | 0.0331 | 1.69E-01 | --- | 9.21E-01 | 2     |         |        |          |     |          |

|    |                   |           |           |   |       |         |         |          |          |          |          |         |         |          |          |          |          |         |         |          |          |          |          |
|----|-------------------|-----------|-----------|---|-------|---------|---------|----------|----------|----------|----------|---------|---------|----------|----------|----------|----------|---------|---------|----------|----------|----------|----------|
| 23 | rs4665527         | 22931682  | t         | c | 14832 | -0.1992 | 0.0601  | 9.23E-04 | ---?+--- | 1.83E-01 | 7872     | 0.0746  | 0.0917  | 4.16E-01 | ++?      | 4.37E-01 | 22704    | -0.1169 | 0.0503  | 2.00E-02 | ++       | 1.25E-02 |          |
|    | <b>rs738274</b>   | 22932895  | c         | g | 18012 | -0.2128 | 0.0596  | 3.57E-04 | ---?+--- | 1.10E-01 | 7872     | 0.0102  | 0.1016  | 9.20E-01 | ++?      | 3.49E-01 | 22684    | -0.1557 | 0.0514  | 2.46E-03 | ++       | 5.83E-02 |          |
|    | rs4300862         | 22933902  | c         | g | 18605 | -0.1629 | 0.0605  | 7.05E-03 | ---?+--- | 1.10E-02 | 7858     | 0.0388  | 0.0955  | 6.85E-01 | ++?      | 7.54E-01 | 22663    | -0.1551 | 0.0511  | 3.97E-02 | ++       | 7.44E-02 |          |
|    | rs7566322         | 22941931  | t         | c | 14831 | 0.1783  | 0.0624  | 4.25E-03 | +++?+--- | 2.66E-01 | 7875     | -0.0715 | 0.0897  | 4.25E-01 | ++?      | 5.60E-01 | 22706    | 0.0968  | 0.0512  | 5.87E-02 | ++       | 2.23E-02 |          |
|    | rs2370384         | 22943794  | a         | g | 14830 | -0.2073 | 0.0595  | 4.96E-04 | ---?+--- | 1.54E-01 | 7875     | 0.0652  | 0.2705  | 4.75E-01 | ++?      | 5.50E-01 | 22705    | -0.1259 | 0.0498  | 1.15E-02 | ++       | 1.25E-02 |          |
|    | rs2347905         | 22945195  | t         | c | 12794 | -0.1606 | 0.0712  | 2.41E-02 | ---?+--- | 1.56E-01 | 7875     | 0.0321  | 0.1084  | 7.61E-01 | ++?      | 4.94E-01 | 22669    | -0.1023 | 0.0595  | 8.58E-02 | ++       | 1.36E-02 |          |
| 24 | <b>rs13411045</b> | 36820906  | VT        | t | c     | 18636   | 0.1366  | 0.0358   | 1.34E-04 | +++++--- | 7.70E-01 | 7875    | -0.0165 | 0.0553   | 7.66E-01 | ++?      | 4.56E-01 | 26111   | 0.0914  | 0.0301   | 2.36E-03 | ++       | 2.01E-02 |
|    | rs13411239        | 36820949  | VT        | a | g     | 18650   | 0.134   | 0.0357   | 1.74E-04 | +++++--- | 7.50E-01 | 7874    | -0.021  | 0.0548   | 7.02E-01 | ++?      | 4.69E-01 | 26524   | 0.0878  | 0.0299   | 3.33E-03 | ++       | 1.78E-02 |
| 25 | rs3796038         | 39099076  | SOS1      | c | g     | 18728   | 0.0731  | 0.0281   | 9.14E-03 | +++++--- | 1.12E-02 | 7862    | 0.0531  | 0.0341   | 1.95E-01 | ++?      | 5.37E-01 | 26590   | 0.0667  | 0.0232   | 4.00E-03 | ++       | 6.87E-01 |
|    | rs10204958        | 39096207  | SOS1      | c | g     | 18542   | 0.0744  | 0.0279   | 7.74E-03 | +++++--- | 1.28E-02 | 7864    | 0.0615  | 0.0394   | 1.18E-01 | ++?      | 6.20E-01 | 26406   | 0.0701  | 0.0208   | 2.08E-03 | ++       | 7.89E-01 |
|    | rs10184015        | 39096633  | SOS1      | a | g     | 18733   | -0.0765 | 0.0281   | 6.42E-03 | +++++--- | 1.41E-02 | 7861    | -0.0659 | 0.0405   | 1.04E-01 | ++?      | 5.15E-01 | 26594   | -0.0731 | 0.0231   | 1.55E-03 | ++       | 8.30E-01 |
|    | rs1470914         | 39099260  | SOS1      | t | g     | 18731   | -0.0774 | 0.0282   | 6.09E-03 | +++++--- | 1.19E-02 | 7861    | -0.0663 | 0.0394   | 9.20E-02 | ++?      | 5.12E-01 | 26592   | -0.0736 | 0.0229   | 1.33E-03 | ++       | 8.19E-01 |
|    | rs1377864         | 39099744  | SOS1      | t | g     | 16708   | -0.051  | 0.0297   | 8.56E-02 | +++?+--- | 1.06E-01 | 7861    | -0.0616 | 0.0393   | 1.17E-01 | ++?      | 5.29E-01 | 26459   | -0.0499 | 0.0237   | 2.06E-02 | ++       | 8.30E-01 |
|    | rs1212882         | 39101360  | SOS1      | t | g     | 18753   | 0.0811  | 0.0282   | 4.00E-03 | +++?+--- | 1.52E-02 | 7861    | 0.052   | 0.0392   | 1.84E-01 | ++?      | 5.65E-01 | 26614   | 0.0712  | 0.0229   | 1.88E-03 | ++       | 5.47E-01 |
|    | rs3033393         | 39102991  | SOS1      | a | g     | 14794   | -0.0051 | 0.0316   | 8.18E-03 | ---?+--- | 3.14E-01 | 7860    | -0.0485 | 0.0397   | 2.21E-01 | ++?      | 6.88E-01 | 22654   | -0.0525 | 0.0247   | 3.36E-02 | ++       | 8.97E-01 |
|    | rs10190377        | 39104177  | SOS1      | a | g     | 18721   | -0.0785 | 0.0282   | 5.42E-03 | +++++--- | 2.82E-02 | 7860    | -0.0495 | 0.0397   | 2.12E-01 | ++?      | 6.85E-01 | 26581   | -0.0689 | 0.023    | 2.78E-03 | ++       | 5.52E-01 |
|    | rs13031871        | 391106355 | SOS1      | a | g     | 16535   | -0.0996 | 0.0303   | 1.02E-03 | +++?+--- | 4.09E-02 | 7860    | -0.0542 | 0.0397   | 1.72E-01 | ++?      | 6.65E-01 | 24395   | -0.0289 | 0.0241   | 5.79E-04 | ++       | 6.35E-01 |
|    | <b>rs11674846</b> | 39125233  | SOS1      | t | c     | 16476   | -0.1116 | 0.0314   | 3.85E-04 | +++?+--- | 3.42E-02 | 7849    | -0.0492 | 0.0394   | 2.11E-01 | ++?      | 7.36E-01 | 24325   | -0.0874 | 0.0246   | 3.74E-04 | ++       | 2.16E-01 |
| 26 | rs7593324         | 58919312  | a         | g | 14829 | 0.0885  | 0.0329  | 7.19E-03 | +++?+--- | 4.18E-01 | 7872     | 0.0058  | 0.044   | 8.95E-01 | ++?      | 7.59E-01 | 22701    | 0.0588  | 0.0263  | 2.55E-02 | ++       | 1.32E-01 |          |
|    | rs7409767         | 58924706  | t         | c | 14723 | 0.0817  | 0.0329  | 1.31E-02 | +++?+--- | 3.96E-01 | 7871     | 0.0079  | 0.044   | 8.58E-01 | ++?      | 8.39E-01 | 22594    | 0.0552  | 0.0263  | 3.61E-02 | ++       | 1.79E-01 |          |
|    | <b>rs1400881</b>  | 58945569  | c         | g | 14760 | -0.1144 | 0.0328  | 4.79E-04 | +++?+--- | 1.22E-02 | 7867     | 0.0006  | 0.0332  | 9.85E-01 | ++?      | 7.78E-01 | 22627    | -0.0576 | 0.0263  | 1.36E-02 | ++       | 1.37E-02 |          |
|    | rs12618463        | 58949304  | a         | g | 12771 | 0.0973  | 0.0363  | 7.38E-03 | +++?+--- | 2.60E-01 | 7861     | 0.0017  | 0.0332  | 9.59E-01 | ++?      | 5.49E-01 | 20632    | 0.0452  | 0.0245  | 6.48E-02 | ++       | 5.20E-02 |          |
| 27 | rs7589969         | 61897757  | LOC647082 | t | g     | 14829   | 0.0561  | 0.0328   | 8.73E-02 | +++?+--- | 2.76E-02 | 7859    | 0.0254  | 0.0391   | 5.15E-01 | ++?      | 7.55E-02 | 22688   | 0.0434  | 0.0201   | 8.40E-02 | ++       | 5.48E-01 |
|    | rs1115893         | 61900219  | LOC647082 | a | g     | 18708   | 0.076   | 0.03     | 1.12E-02 | +++++--- | 2.49E-02 | 7872    | -0.0038 | 0.0333   | 9.08E-01 | ++?      | 1.13E-01 | 26580   | 0.0402  | 0.0223   | 7.10E-02 | ++       | 7.50E-02 |
|    | rs1115894         | 61900221  | FLI3305   | a | g     | 14782   | 0.0639  | 0.0332   | 5.44E-02 | +++?+--- | 2.01E-02 | 7873    | 0.0354  | 0.0405   | 3.74E-01 | ++?      | 5.49E-02 | 26519   | 0.0271  | 0.0259   | 4.16E-02 | ++       | 5.90E-02 |
|    | rs1115895         | 61922862  | FLI3305   | t | g     | 18797   | -0.0805 | 0.0297   | 6.66E-03 | +++++--- | 3.88E-02 | 7871    | -0.0257 | 0.0409   | 5.30E-01 | ++?      | 4.30E-02 | 26668   | -0.0616 | 0.024    | 1.04E-02 | ++       | 2.78E-01 |
|    | rs1115896         | 61923032  | FLI3305   | t | g     | 18781   | 0.0819  | 0.0296   | 5.76E-03 | +++++--- | 3.46E-02 | 7873    | 0.027   | 0.0409   | 5.10E-01 | ++?      | 6.06E-02 | 26564   | 0.063   | 0.024    | 8.58E-03 | ++       | 2.77E-01 |
|    | rs6750080         | 61925046  | FLI3305   | t | g     | 18795   | 0.0818  | 0.0296   | 5.73E-03 | +++++--- | 3.60E-02 | 7873    | 0.027   | 0.0409   | 5.10E-01 | ++?      | 6.06E-02 | 26668   | 0.063   | 0.024    | 8.65E-03 | ++       | 2.78E-01 |
|    | rs1115898         | 61939399  | FLI3305   | t | g     | 18786   | -0.0825 | 0.0296   | 5.34E-03 | +++++--- | 5.18E-02 | 7872    | -0.0266 | 0.0409   | 5.16E-01 | ++?      | 7.18E-02 | 26588   | -0.0633 | 0.024    | 8.31E-03 | ++       | 2.68E-01 |
|    | rs12463815        | 61940669  | FLI3305   | t | g     | 18785   | 0.0832  | 0.0296   | 4.99E-03 | +++++--- | 5.98E-02 | 7875    | 0.0278  | 0.0409   | 4.98E-01 | ++?      | 7.57E-02 | 26660   | 0.0642  | 0.024    | 7.46E-03 | ++       | 2.73E-01 |
|    | rs12997436        | 61942282  | FLI3305   | a | g     | 16446   | -0.0756 | 0.0321   | 1.85E-02 | +++?+--- | 3.75E-02 | 7875    | -0.0278 | 0.0409   | 4.98E-01 | ++?      | 7.57E-02 | 24321   | -0.0574 | 0.0253   | 2.31E-02 | ++       | 3.58E-01 |
|    | rs12470090        | 61947871  | CCT4      | t | g     | 18784   | -0.0808 | 0.0296   | 6.37E-03 | +++++--- | 5.76E-02 | 7875    | -0.0278 | 0.0409   | 4.98E-01 | ++?      | 7.57E-02 | 26659   | -0.0626 | 0.024    | 9.06E-03 | ++       | 2.94E-01 |
|    | rs2901428         | 61954848  | CCT4      | t | g     | 18785   | -0.0776 | 0.0292   | 7.85E-03 | +++++--- | 3.53E-02 | 7875    | -0.0319 | 0.039    | 4.14E-01 | ++?      | 9.76E-02 | 26660   | -0.0612 | 0.0234   | 8.86E-03 | ++       | 3.48E-01 |
|    | rs17573253        | 61955149  | CCT4      | a | g     | 18813   | -0.0787 | 0.0297   | 7.95E-03 | +++++--- | 4.87E-02 | 7871    | -0.024  | 0.0409   | 4.07E-01 | ++?      | 6.09E-02 | 26684   | -0.0633 | 0.024    | 8.47E-03 | ++       | 3.77E-01 |
|    | rs12427249        | 61961136  | CCT4      | t | g     | 18785   | 0.0468  | 0.029    | 1.96E-01 | +++?+--- | 1.64E-01 | 376     | 0.0745  | 0.5205   | 1.54E-01 | ++?      | 1.00E+00 | 19063   | 0.0157  | 0.0509   | 2.69E-03 | ++       | 2.56E-01 |
|    | rs12466300        | 61961350  | CCT4      | a | g     | 18784   | -0.0765 | 0.029    | 8.38E-03 | +++?+--- | 3.64E-02 | 7875    | -0.0319 | 0.039    | 4.14E-01 | ++?      | 9.76E-02 | 26659   | -0.0606 | 0.0233   | 9.19E-03 | ++       | 3.59E-01 |
|    | <b>rs756087</b>   | 61971889  | FLI3305   | a | g     | 16472   | 0.1186  | 0.0319   | 1.99E-04 | +++?+--- | 8.06E-01 | 7859    | 0.0363  | 0.0393   | 3.55E-01 | ++?      | 7.08E-02 | 24331   | 0.0859  | 0.0248   | 5.23E-04 | ++       | 1.04E-01 |
|    | rs6755907         | 61971944  | FLI3305   | t | g     | 18782   | 0.0709  | 0.0292   | 1.50E-02 | +++++--- | 2.76E-02 | 7875    | 0.0356  | 0.0392   | 3.64E-01 | ++?      | 9.37E-02 | 26657   | 0.0883  | 0.0234   | 1.28E-02 | ++       | 4.70E-01 |
| 28 | rs6714614         | 67303043  | a         | c | 18737 | 0.0884  | 0.0264  | 8.17E-04 | +++++--- | 2.63E-01 | 7874     | -0.0279 | 0.0382  | 4.65E-01 | ++?      | 9.93E-01 | 26611    | -0.0508 | 0.0217  | 1.93E-02 | ++       | 1.23E-02 |          |
|    | rs1384741         | 67306676  | t         | c | 18775 | -0.0851 | 0.0262  | 1.18E-03 | +++++--- | 2.89E-01 | 7873     | 0.0313  | 0.0381  | 4.11E-01 | ++?      | 9.46E-01 | 26648    | -0.0477 | 0.0216  | 2.71E-02 | ++       | 1.18E-02 |          |
|    | rs875037          | 67310204  | t         | c | 18780 | 0.0904  | 0.0263  | 5.93E-04 | +++++--- | 2.81E-01 | 7872     | -0.0243 | 0.0383  | 5.25E-01 | ++?      | 8.92E-01 | 26652    | -0.0366 | 0.0217  | 1.34E-02 | ++       | 1.36E-02 |          |
|    | rs1351723         | 67312811  | t         | c | 16724 | 0.0804  | 0.0281  | 4.16E-03 | +++?+--- | 2.71E-01 | 7874     | -0.0251 | 0.0382  | 5.11E-01 | ++?      | 9.92E-01 | 24998    | -0.0344 | 0.0226  | 5.54E-02 | ++       | 2.61E-02 |          |
|    | rs1483337         | 67315153  | t         | g | 18658 | 0.0897  | 0.0264  | 6.90E-04 | +++++--- | 3.22E-01 | 7873     | -0.0245 | 0.0382  | 5.21E-01 | ++?      | 9.59E-01 | 26531    | -0.0528 | 0.0217  | 1.51E-02 | ++       | 1.99E-02 |          |
|    | <b>rs1483339</b>  | 67316231  | FLI3305   | t | g     | 18643   | 0.0928  | 0.0264   | 4.42E-04 | +++++--- | 3.49E-01 | 7871    | -0.0262 | 0.0382   | 4.92E-01 | ++?      | 8.99E-01 | 26534   | -0.0543 | 0.0217   | 1.24E-02 | ++       | 1.95E-02 |
|    | rs1483486         | 67316486  | FLI3305   | t | g     | 16632   | 0.0599  | 0.0292   | 4.04E-02 | +++?+--- | 1.03E-01 | 7887    | 0.0309  | 0.039    | 4.28E-01 | ++?      | 1.00E+00 | 18311   | 0.0271  | 0.0237   | 2.53E-02 | ++       | 5.48E-02 |
|    | rs2022204         | 67326049  | FLI3305   | a | g     | 10824   | 0.0574  | 0.0364   | 1.15E-01 | +++?+--- | 8.06E-01 | 7857    | -0.04   | 0.0411   | 3.30E-01 |          |          |         |         |          |          |          |          |

|            |           |            |           |       |         |         |          |          |          |          |        |          |          |          |          |          |        |          |          |          |          |          |  |
|------------|-----------|------------|-----------|-------|---------|---------|----------|----------|----------|----------|--------|----------|----------|----------|----------|----------|--------|----------|----------|----------|----------|----------|--|
| rs13008978 | 2         | 215191856  | a         | t     | 18739   | 0.0507  | 0.0281   | 7.18E-02 | +++++    | 8.04E-02 | 7874   | -0.0267  | 0.0366   | 4.65E-01 | -?       | 4.45E-01 | 26613  | 0.022    | 0.0223   | 3.24E-01 | ++       | 9.35E-02 |  |
| rs13009193 | 2         | 215191899  | t         | c     | 18734   | -0.0508 | 0.0281   | 7.12E-02 | -----    | 7.96E-02 | 7874   | 0.0497   | 0.0398   | 2.12E-01 | +        | 5.23E-01 | 26608  | -0.0174  | 0.023    | 4.49E-01 | ++       | 3.91E-02 |  |
| rs10498018 | 2         | 2151919481 | t         | c     | 18807   | 0.0856  | 0.0282   | 2.36E-03 | +++++    | 5.74E-01 | 7874   | -0.0526  | 0.04     | 1.89E-01 | -?       | 5.33E-01 | 26681  | 0.0377   | 0.023    | 8.49E-01 | ++       | 4.75E-03 |  |
| rs1040863  | 2         | 2151919764 | a         | g     | 18816   | 0.0861  | 0.0281   | 2.21E-03 | +++++    | 5.79E-01 | 7870   | -0.0526  | 0.04     | 1.89E-01 | -?       | 5.33E-01 | 26686  | 0.0403   | 0.023    | 7.99E-02 | ++       | 4.55E-03 |  |
| rs10880806 | 2         | 215192000  | t         | g     | 18807   | 0.086   | 0.0282   | 2.26E-03 | +++++    | 5.70E-01 | 7874   | -0.0526  | 0.04     | 1.89E-01 | -?       | 5.33E-01 | 26681  | 0.04     | 0.023    | 8.28E-02 | ++       | 4.65E-03 |  |
| rs9729602  | 2         | 215196602  | t         | g     | 18807   | -0.0861 | 0.0282   | 2.22E-03 | -----    | 5.69E-01 | 7874   | 0.0526   | 0.04     | 1.89E-01 | +        | 5.33E-01 | 26681  | -0.0401  | 0.023    | 8.23E-02 | ++       | 4.60E-03 |  |
| rs972906   | 2         | 215197039  | t         | g     | 18807   | 0.0862  | 0.0282   | 2.21E-03 | +++++    | 5.68E-01 | 7874   | -0.0526  | 0.04     | 1.89E-01 | -?       | 5.33E-01 | 26681  | 0.0401   | 0.023    | 8.18E-02 | ++       | 4.57E-03 |  |
| rs222182   | 2         | 215197375  | t         | g     | 18806   | 0.0867  | 0.0282   | 2.07E-03 | +++++    | 5.66E-01 | 7874   | -0.0526  | 0.04     | 1.89E-01 | -?       | 5.33E-01 | 26680  | 0.0405   | 0.023    | 7.93E-02 | ++       | 4.42E-03 |  |
| rs9288498  | 2         | 215197535  | g         | 18745 | -0.0878 | 0.0282  | 1.86E-03 | -----    | 5.67E-01 | 7874     | 0.0507 | 0.0401   | 2.06E-01 | +        | 5.26E-01 | 26619    | -0.042 | 0.0231   | 6.88E-02 | ++       | 4.73E-03 |          |  |
| rs9646850  | 2         | 215197793  | a         | c     | 16717   | -0.0958 | 0.03     | 1.41E-03 | -?-----  | 5.18E-01 | 7874   | 0.0507   | 0.0401   | 2.06E-01 | +        | 5.26E-01 | 24591  | -0.0432  | 0.024    | 7.19E-02 | ++       | 3.44E-03 |  |
| rs9288499  | 2         | 215197923  | a         | g     | 18745   | -0.0879 | 0.0282   | 1.82E-03 | -----    | 5.64E-01 | 7874   | 0.0507   | 0.0401   | 2.06E-01 | +        | 5.26E-01 | 26619  | -0.042   | 0.0231   | 6.84E-02 | ++       | 4.70E-03 |  |
| rs4513290  | 2         | 215198940  | c         | g     | 18806   | 0.0427  | 0.0281   | 1.29E-01 | +++++    | 4.26E-02 | 7874   | -0.0507  | 0.0401   | 2.06E-01 | -?       | 5.26E-01 | 26680  | 0.0119   | 0.023    | 6.04E-01 | ++       | 5.65E-02 |  |
| rs1914515  | 2         | 215199321  | t         | c     | 18806   | 0.0889  | 0.0282   | 1.59E-03 | +++++    | 5.28E-01 | 7874   | -0.0507  | 0.0401   | 2.06E-01 | -?       | 5.26E-01 | 26680  | 0.0427   | 0.0231   | 6.41E-02 | ++       | 4.40E-03 |  |
| rs1768996  | 2         | 215201034  | t         | g     | 18807   | -0.0887 | 0.0282   | 1.63E-03 | -----    | 5.23E-01 | 7874   | 0.0507   | 0.0401   | 2.06E-01 | +        | 5.26E-01 | 26681  | -0.0426  | 0.0231   | 6.50E-02 | ++       | 4.46E-03 |  |
| rs5019644  | 2         | 215201829  | t         | g     | 18806   | -0.0872 | 0.0281   | 1.94E-03 | -----    | 5.59E-01 | 7874   | 0.0501   | 0.0401   | 2.06E-01 | +        | 5.26E-01 | 26680  | -0.0418  | 0.023    | 6.94E-02 | ++       | 4.82E-03 |  |
| rs5019643  | 2         | 215201886  | t         | g     | 18751   | 0.0846  | 0.0283   | 2.75E-03 | +++++    | 6.01E-01 | 7874   | -0.0507  | 0.0401   | 2.06E-01 | -?       | 5.26E-01 | 26625  | 0.0396   | 0.0231   | 8.66E-02 | ++       | 5.84E-03 |  |
| rs5019642  | 2         | 215201905  | t         | g     | 18806   | -0.09   | 0.0282   | 1.40E-03 | -----    | 5.05E-01 | 7874   | 0.0507   | 0.0401   | 2.06E-01 | +        | 5.26E-01 | 26680  | 0.0434   | 0.0231   | 5.97E-02 | ++       | 4.10E-03 |  |
| rs5019641  | 2         | 215201929  | t         | g     | 16444   | 0.0879  | 0.0304   | 3.87E-03 | +++++    | 4.26E-01 | 7870   | -0.049   | 0.0401   | 2.22E-01 | -?       | 6.50E-01 | 24314  | 0.0379   | 0.0242   | 1.17E-01 | ++       | 6.52E-03 |  |
| rs10178091 | 2         | 215203048  | c         | g     | 16775   | -0.0983 | 0.03     | 1.05E-03 | -?-----  | 4.80E-01 | 7874   | 0.0507   | 0.0401   | 2.06E-01 | +        | 5.26E-01 | 24649  | -0.0448  | 0.024    | 6.20E-02 | ++       | 2.93E-03 |  |
| rs17764788 | 2         | 215203853  | a         | g     | 16503   | 0.097   | 0.03     | 1.24E-03 | +++++    | 5.20E-01 | 7862   | -0.0521  | 0.0401   | 1.94E-01 | -?       | 4.23E-01 | 24365  | 0.0435   | 0.024    | 7.02E-02 | ++       | 2.91E-03 |  |
| rs7574717  | 2         | 215204536  | a         | g     | 18797   | 0.0893  | 0.0282   | 1.55E-03 | +++++    | 5.56E-01 | 7875   | -0.0511  | 0.0401   | 2.02E-01 | -?       | 4.95E-01 | 24672  | 0.0428   | 0.0231   | 6.33E-02 | ++       | 4.18E-03 |  |
| rs7601421  | 2         | 215204709  | t         | c     | 16783   | 0.0472  | 0.03     | 1.15E-01 | +++++    | 3.28E-02 | 7875   | -0.0511  | 0.0401   | 2.02E-01 | -?       | 4.95E-01 | 24658  | 0.0119   | 0.024    | 6.20E-01 | ++       | 4.97E-02 |  |
| rs7604462  | 2         | 215204989  | a         | g     | 16781   | 0.0971  | 0.03     | 1.21E-03 | +++++    | 5.19E-01 | 7875   | -0.0511  | 0.0401   | 2.02E-01 | -?       | 4.95E-01 | 24656  | 0.0439   | 0.024    | 6.75E-02 | ++       | 3.08E-03 |  |
| rs1040217  | 2         | 215209400  | t         | g     | 18769   | 0.0851  | 0.0282   | 2.56E-03 | +++++    | 6.31E-01 | 7875   | -0.0511  | 0.0401   | 2.02E-01 | -?       | 4.95E-01 | 24644  | 0.04     | 0.0231   | 8.27E-02 | ++       | 5.47E-03 |  |
| rs7603357  | 2         | 215210221  | t         | g     | 18817   | 0.0871  | 0.0282   | 2.02E-03 | +++++    | 5.91E-01 | 7875   | -0.0511  | 0.0401   | 2.02E-01 | -?       | 4.95E-01 | 24660  | 0.0414   | 0.0231   | 7.29E-02 | ++       | 4.82E-03 |  |
| rs4234004  | 2         | 215210224  | a         | g     | 18792   | 0.0789  | 0.0282   | 2.54E-03 | +++++    | 6.41E-01 | 7875   | -0.0511  | 0.0401   | 2.02E-01 | -?       | 4.95E-01 | 24667  | 0.0359   | 0.0231   | 1.20E-01 | ++       | 8.01E-03 |  |
| rs1971409  | 2         | 215210825  | a         | g     | 18781   | 0.0527  | 0.0283   | 2.64E-02 | +++++    | 1.82E-01 | 7875   | -0.0511  | 0.0401   | 2.02E-01 | -?       | 4.95E-01 | 24656  | 0.0182   | 0.0231   | 4.32E-01 | ++       | 3.44E-02 |  |
| rs10210694 | 2         | 215211235  | a         | g     | 16410   | 0.0842  | 0.0307   | 6.11E-03 | +++++    | 5.71E-01 | 7865   | -0.0488  | 0.0402   | 2.25E-01 | -?       | 5.84E-01 | 24725  | 0.0352   | 0.024    | 1.49E-01 | ++       | 8.55E-03 |  |
| rs13406678 | 2         | 215211250  | c         | g     | 16783   | 0.0975  | 0.0301   | 1.20E-03 | +++++    | 5.58E-01 | 7875   | -0.0511  | 0.0401   | 2.02E-01 | -?       | 4.95E-01 | 24658  | 0.0439   | 0.0241   | 6.79E-02 | ++       | 3.04E-03 |  |
| rs13410212 | 2         | 215212115  | t         | g     | 14448   | 0.0989  | 0.0328   | 2.57E-03 | +++++    | 4.22E-01 | 7875   | -0.0511  | 0.0401   | 2.02E-01 | -?       | 4.95E-01 | 23233  | 0.0388   | 0.0254   | 1.27E-01 | ++       | 3.79E-03 |  |
| rs6435841  | 2         | 215212708  | a         | g     | 16759   | 0.0991  | 0.0301   | 1.92E-04 | +++++    | 5.03E-01 | 7875   | -0.0511  | 0.0401   | 2.02E-01 | -?       | 4.95E-01 | 24634  | 0.045    | 0.0241   | 6.18E-02 | ++       | 2.74E-03 |  |
| rs6435842  | 2         | 215212823  | t         | g     | 16756   | 0.099   | 0.0301   | 1.02E-03 | +++++    | 4.86E-01 | 7875   | -0.0511  | 0.0401   | 2.02E-01 | -?       | 4.95E-01 | 24631  | 0.0449   | 0.0241   | 6.21E-02 | ++       | 2.76E-03 |  |
| rs6743885  | 2         | 215213267  | a         | g     | 16751   | 0.0994  | 0.0301   | 9.53E-04 | +++++    | 4.70E-01 | 7875   | -0.0511  | 0.0401   | 2.02E-01 | -?       | 4.95E-01 | 24626  | 0.0452   | 0.0241   | 6.07E-02 | ++       | 2.69E-03 |  |
| rs6739136  | 2         | 215213460  | a         | t     | 16760   | 0.1089  | 0.0301   | 2.91E-04 | +++++    | 4.16E-01 | 7874   | -0.0507  | 0.0401   | 2.06E-01 | -?       | 5.26E-01 | 24574  | 0.0514   | 0.0241   | 3.28E-02 | ++       | 1.46E-03 |  |
| rs6739865  | 2         | 215213675  | a         | g     | 16692   | 0.1066  | 0.0301   | 3.98E-04 | +++++    | 4.69E-01 | 7874   | -0.0507  | 0.0401   | 2.06E-01 | -?       | 5.26E-01 | 24566  | 0.0499   | 0.0241   | 3.81E-02 | ++       | 1.71E-03 |  |
| rs6747271  | 2         | 215213903  | t         | c     | 16763   | -0.1089 | 0.03     | 2.87E-04 | -?-----  | 3.00E-01 | 7874   | 0.0507   | 0.0401   | 2.06E-01 | +        | 5.26E-01 | 24637  | -0.0516  | 0.024    | 3.16E-02 | ++       | 1.44E-03 |  |
| rs10173431 | 2         | 215214041  | a         | g     | 16700   | -0.1091 | 0.0302   | 3.11E-04 | -?-----  | 2.67E-01 | 7853   | 0.0488   | 0.0402   | 2.24E-01 | +        | 6.61E-01 | 24553  | -0.0521  | 0.0241   | 3.08E-02 | ++       | 1.69E-03 |  |
| rs1535322  | 2         | 215215323  | a         | g     | 16704   | 0.1072  | 0.0302   | 3.79E-04 | +++++    | 2.69E-01 | 7848   | -0.0486  | 0.0402   | 2.26E-01 | -?       | 6.79E-01 | 24552  | 0.051    | 0.0241   | 3.47E-02 | ++       | 1.94E-03 |  |
| rs16852400 | 2         | 215215381  | c         | g     | 16704   | 0.1081  | 0.0302   | 3.42E-04 | +++++    | 2.89E-01 | 7848   | -0.0486  | 0.0402   | 2.26E-01 | -?       | 6.79E-01 | 24552  | 0.0516   | 0.0241   | 3.27E-02 | ++       | 1.83E-03 |  |
| rs4080303  | 2         | 215216268  | a         | g     | 16703   | 0.1095  | 0.0302   | 2.88E-04 | +++++    | 3.14E-01 | 7845   | -0.0506  | 0.0402   | 2.08E-01 | -?       | 5.15E-01 | 24548  | -0.0517  | 0.0241   | 3.21E-02 | ++       | 1.45E-03 |  |
| rs12466043 | 2         | 215217141  | t         | g     | 14307   | -0.1143 | 0.033    | 5.36E-04 | -?-----  | 2.45E-01 | 7844   | 0.0508   | 0.0402   | 2.06E-01 | +        | 4.97E-01 | 22151  | -0.0478  | 0.0255   | 6.08E-02 | ++       | 1.50E-03 |  |
| rs5776443  | 2         | 215217785  | t         | g     | 14372   | 0.1103  | 0.0329   | 3.18E-04 | +++++    | 2.18E-01 | 7843   | -0.0503  | 0.0402   | 2.11E-01 | -?       | 5.34E-01 | 22215  | -0.0459  | 0.0255   | 7.13E-02 | ++       | 1.99E-03 |  |
| rs7606845  | 2         | 215218170  | a         | g     | 16707   | -0.1088 | 0.0302   | 3.16E-04 | -?-----  | 3.12E-01 | 7843   | 0.0503   | 0.0402   | 2.11E-01 | +        | 5.34E-01 | 24550  | -0.0514  | 0.0241   | 3.33E-02 | ++       | 1.56E-03 |  |
| rs7580615  | 2         | 215218278  | t         | c     | 16667   | 0.0997  | 0.0302   | 9.67E-04 | +++++    | 4.37E-01 | 7843   | -0.0503  | 0.0402   | 2.11E-01 | -?       | 5.34E-01 | 24510  | 0.0456   | 0.0241   | 5.93E-02 | ++       | 2.85E-03 |  |
| rs7580859  | 2         | 215218324  | a         | g     | 16687   | 0.1042  | 0.0302   | 5.62E-04 | +++++    | 3.54E-01 | 7843   | -0.0503  | 0.0402   | 2.11E-01 | -?       | 5.34E-01 | 24510  | 0.0453   | 0.0241   | 4.47E-02 | ++       | 2.12E-03 |  |
| rs10196683 | 2         | 215219623  | t         | c     | 16665   | 0.1066  | 0.0304   | 4.52E-04 | +++++    | 3.27E-01 | 7847   | -0.045   | 0.0411   | 2.74E-01 | ?        | 1.00E-01 | 24152  | 0.053    | 0.0244   | 3.02E-02 | ++       | 3.02E-03 |  |
| 35         | rs1959982 | 2          | 223956117 | ALPP  | a       | g       | 16756    | -0.1072  | 0.0296   | 2.85E-04 | -----  | 9.85E-01 | 7875     | -0.0786  | 0.0387   | 4.77E-02 | -?     | 6.00E-01 | 24631    | -0.0959  | 0.0235   | 4.52E-05 |  |

|            |            |          |        |   |       |         |        |          |          |          |          |         |        |          |          |          |          |         |        |           |          |          |          |
|------------|------------|----------|--------|---|-------|---------|--------|----------|----------|----------|----------|---------|--------|----------|----------|----------|----------|---------|--------|-----------|----------|----------|----------|
| rs1613185  | 23430468   | UBE2Z    | t      | c | 18648 | 0.1106  | 0.029  | 1.34e-04 | +++++    | 5.67e-01 | 10351    | 0.1742  | 0.0494 | 4.24e-04 | +++      | 8.81e-01 | 28999    | 0.1269  | 0.025  | 3.89e-07  | ++       | 2.67e-01 |          |
| rs13094957 | 23432084   | UBE2Z    | t      | c | 14822 | 0.119   | 0.0324 | 2.38e-04 | +++++    | 4.36e-01 | 10348    | 0.1727  | 0.0495 | 4.88e-04 | +++      | 8.74e-01 | 25170    | 0.1351  | 0.0271 | 6.24e-07  | ++       | 3.64e-01 |          |
| rs1309303  | 23438651   | UBE2Z    | a      | g | 18747 | -0.1336 | 0.0334 | 6.46e-05 | -----    | 4.08e-01 | 2867     | -0.1823 | 0.0701 | 9.31e-03 | --?      | 6.84e-01 | 21614    | -0.1262 | 0.0302 | 2.25e-07  | --       | 5.31e-01 |          |
| rs13095736 | 23439324   | UBE2Z    | t      | c | 18756 | -0.1322 | 0.0334 | 7.59e-05 | -----    | 4.24e-01 | 2864     | -0.1847 | 0.0701 | 8.43e-03 | --?      | 6.62e-01 | 21620    | -0.1419 | 0.0302 | 2.52e-06  | --       | 4.99e-01 |          |
| rs178493   | 23441259   | UBE2Z    | t      | g | 18520 | 0.0927  | 0.0252 | 2.36e-04 | +++++    | 7.03e-01 | 10286    | 0.094   | 0.0421 | 2.53e-02 | +++      | 2.95e-01 | 28806    | 0.093   | 0.0216 | 1.68e-05  | +++      | 9.79e-01 |          |
| rs1762372  | 23441259   | UBE2Z    | a      | c | 18587 | -0.1074 | 0.029  | 2.16e-04 | +++++    | 6.20e-01 | 10342    | -0.1801 | 0.0494 | 2.69e-04 | +++      | 9.16e-01 | 28850    | -0.126  | 0.025  | 4.67e-07  | ++       | 2.04e-01 |          |
| rs8733229  | 23442030   | UBE2Z    | t      | c | 18791 | -0.1362 | 0.0333 | 4.33e-05 | -----    | 4.23e-01 | 10351    | -0.1647 | 0.0393 | 2.74e-05 | ---      | 8.46e-01 | 29142    | -0.1481 | 0.0254 | 5.55e-09  | ---      | 5.80e-01 |          |
| rs2359765  | 23442777   | UBE2Z    | a      | g | 18509 | -0.1078 | 0.0291 | 2.09e-04 | +++++    | 6.20e-01 | 10353    | -0.1842 | 0.0494 | 1.94e-04 | ---      | 9.25e-01 | 28862    | -0.1275 | 0.0251 | 3.69e-07  | --       | 1.83e-01 |          |
| rs17013216 | 23451012   | UBE2Z    | t      | c | 16763 | 0.1486  | 0.0352 | 2.44e-05 | +++++    | 3.78e-01 | 10352    | 0.1551  | 0.065  | 1.70e-02 | +++      | 5.69e-01 | 27115    | 0.1501  | 0.031  | 1.24e-06  | +++      | 9.30e-01 |          |
| rs17013223 | 23451411   | UBE2Z    | a      | g | 16763 | -0.1487 | 0.0351 | 2.31e-05 | -----    | 3.77e-01 | 2865     | -0.1818 | 0.0702 | 9.62e-03 | --?      | 7.35e-01 | 29128    | -0.1553 | 0.0314 | 7.57e-07  | --       | 6.73e-01 |          |
| rs17013241 | 23457114   | UBE2Z    | t      | c | 18772 | -0.1393 | 0.0333 | 2.86e-05 | -----    | 3.71e-01 | 2858     | -0.1851 | 0.0703 | 8.44e-03 | --?      | 7.83e-01 | 21630    | -0.1477 | 0.0301 | 9.22e-07  | --       | 5.56e-01 |          |
| rs17013245 | 23457379   | UBE2Z    | a      | g | 18713 | -0.1402 | 0.0337 | 3.11e-05 | -----    | 3.50e-01 | 2836     | -0.1987 | 0.0715 | 5.47e-03 | --?      | 8.95e-01 | 21549    | -0.1508 | 0.0305 | 7.70e-07  | --       | 4.59e-01 |          |
| rs17013286 | 23471138   | UBE2Z    | t      | c | 18773 | 0.1471  | 0.0353 | 2.76e-05 | +++++    | 3.68e-01 | 10341    | 0.1698  | 0.0402 | 2.45e-05 | +++      | 9.80e-01 | 27114    | 0.1517  | 0.0264 | 2.90e-09  | +++      | 6.72e-01 |          |
| rs17013320 | 23488060   | UBE2Z    | t      | g | 18753 | -0.1398 | 0.0333 | 2.65e-05 | -----    | 4.44e-01 | 10342    | -0.1704 | 0.0403 | 2.31e-05 | ---      | 9.81e-01 | 29055    | -0.1522 | 0.0257 | 3.04e-09  | ---      | 5.58e-01 |          |
| rs17013322 | 23492833   | UBE2Z    | t      | c | 18720 | -0.1476 | 0.0353 | 2.93e-05 | -----    | 4.78e-01 | 10345    | -0.183  | 0.040  | 1.89e-05 | ---      | 9.55e-01 | 27065    | -0.1588 | 0.0265 | 2.25e-09  | ---      | 6.31e-01 |          |
| rs1695192  | 23497007   | UBE2Z    | t      | g | 18729 | 0.0825  | 0.0236 | 4.76e-04 | +++++    | 5.16e-01 | 10338    | 0.0839  | 0.0299 | 4.94e-03 | +++      | 2.74e-01 | 29067    | 0.083   | 0.0185 | 7.38e-06  | +++      | 9.71e-01 |          |
| rs1692647  | 23497813   | UBE2Z    | a      | c | 18731 | -0.0831 | 0.0236 | 4.33e-04 | -----    | 5.17e-01 | 10338    | -0.0845 | 0.0299 | 4.65e-03 | ---      | 2.72e-01 | 29069    | -0.0836 | 0.0185 | 6.34e-06  | ---      | 9.71e-01 |          |
| rs17013333 | 23498110   | UBE2Z    | t      | g | 16724 | 0.1501  | 0.0351 | 1.95e-05 | +++++    | 4.47e-01 | 10343    | 0.1752  | 0.0402 | 1.33e-05 | +++      | 9.35e-01 | 27067    | 0.161   | 0.0264 | 1.15e-09  | +++      | 6.38e-01 |          |
| rs17013344 | 23500465   | UBE2Z    | a      | g | 16773 | -0.1484 | 0.0351 | 2.39e-05 | -----    | 4.36e-01 | 10346    | -0.1773 | 0.0402 | 1.04e-05 | ---      | 9.63e-01 | 27119    | -0.1609 | 0.0264 | 1.16e-09  | ---      | 5.88e-01 |          |
| rs17013348 | 23501001   | UBE2Z    | a      | g | 16777 | -0.1473 | 0.0351 | 2.74e-05 | -----    | 4.09e-01 | 10346    | -0.1773 | 0.0402 | 1.04e-05 | ---      | 9.63e-01 | 27123    | -0.1603 | 0.0264 | 1.35e-09  | ---      | 5.74e-01 |          |
| rs801277   | 23504025   | UBE2Z    | t      | c | 18808 | -0.0897 | 0.0237 | 1.48e-04 | -----    | 5.07e-01 | 10337    | -0.1153 | 0.03   | 1.25e-04 | ---      | 5.25e-01 | 29145    | -0.0995 | 0.0186 | 8.68e-08  | ---      | 5.03e-01 |          |
| rs9631541  | 23514783   | UBE2Z    | a      | g | 18774 | -0.0887 | 0.0237 | 1.78e-04 | -----    | 6.12e-01 | 10351    | -0.1186 | 0.03   | 7.87e-05 | ---      | 6.53e-01 | 29125    | -0.1002 | 0.0186 | 7.15e-08  | ---      | 4.34e-01 |          |
| rs1011754  | 23516061   | UBE2Z    | a      | g | 18805 | -0.1382 | 0.0333 | 3.34e-05 | -----    | 4.36e-01 | 10352    | -0.1758 | 0.0402 | 1.23e-05 | ---      | 9.57e-01 | 29157    | -0.1525 | 0.0256 | 2.15e-09  | ---      | 4.71e-01 |          |
| rs17013383 | 23522375   | UBE2Z    | a      | t | 16775 | -0.1522 | 0.0351 | 1.47e-05 | -----    | 3.65e-01 | 10354    | -0.1742 | 0.0402 | 1.48e-05 | ---      | 9.53e-01 | 27129    | -0.1617 | 0.0264 | 9.57e-10  | ---      | 6.80e-01 |          |
| rs17013389 | 23523928   | UBE2Z    | t      | c | 16773 | -0.1483 | 0.0354 | 2.98e-05 | -----    | 4.91e-01 | 10324    | -0.186  | 0.0494 | 3.16e-06 | ---      | 7.56e-01 | 27126    | -0.1617 | 0.0266 | 1.22e-09  | ---      | 6.17e-01 |          |
| rs17013429 | 23525558   | UBE2Z    | a      | c | 16741 | -0.142  | 0.036  | 8.07e-05 | -----    | 3.78e-01 | 10311    | -0.165  | 0.0399 | 3.47e-05 | ---      | 6.94e-01 | 27052    | -0.1523 | 0.0267 | 1.21e-08  | ---      | 6.69e-01 |          |
| rs17013433 | 23525598   | UBE2Z    | a      | g | 16704 | 0.1394  | 0.0344 | 5.10e-05 | +++++    | 7.47e-01 | 10301    | 0.186   | 0.0391 | 1.99e-06 | +++      | 9.53e-01 | 27005    | 0.1597  | 0.0258 | 6.22e-10  | +++      | 3.71e-01 |          |
| 40         | rs8957064  | 24061882 | THRB   | a | c     | 12365   | 0.1001 | 0.032    | 1.77e-03 | +++++    | 1.74e-01 | 7847    | 0.002  | 0.068    | 9.57e-01 | ??       | 1.00e+00 | 29059   | 0.0241 | 0.166e-02 | ++       | 4.43e-02 |          |
| rs2044755  | 24067930   | THRB     | a      | t | 14765 | 0.1042  | 0.0288 | 2.90e-04 | +++++    | 8.41e-01 | 7848     | 0.0107  | 0.0361 | 7.67e-01 | ++?      | 3.95e-01 | 22613    | 0.0678  | 0.0225 | 2.59e-05  | ++       | 4.29e-02 |          |
| 41         | rs1485916  | 31154343 |        | a | c     | 16448   | 0.3563 | 0.0893   | 6.61e-05 | +++++    | 7.87e-01 | 2822    | 0.0414 | 0.201    | 8.43e-01 | ++?      | 8.69e-01 | 19320   | 0.3077 | 0.0821    | 2.19e-04 | ++       | 1.66e-01 |
| rs839593   | 31159203   |          | t      | c | 16440 | -0.2359 | 0.0952 | 1.32e-02 | -----    | 7.56e-01 | 2876     | 0.0061  | 0.214  | 9.77e-01 | ++?      | 9.53e-01 | 19316    | -0.1951 | 0.0868 | 2.46e-02  | ++?      | 2.97e-01 |          |
| rs186074   | 31173029   |          | c      | g | 14439 | -0.218  | 0.1024 | 3.33e-02 | -----    | 7.74e-01 | 2876     | -0.1324 | 0.214  | 9.50e-01 | ++?      | 9.18e-01 | 17315    | -0.1794 | 0.0922 | 5.18e-02  | ++?      | 3.86e-01 |          |
| rs17612607 | 31176419   |          | c      | g | 16472 | -0.1931 | 0.0961 | 4.44e-02 | -----    | 9.54e-01 | 2876     | -0.1324 | 0.214  | 9.50e-01 | ++?      | 9.18e-01 | 19348    | -0.1626 | 0.0876 | 6.34e-02  | ++?      | 4.41e-01 |          |
| rs1701447  | 31176976   |          | c      | g | 16435 | -0.1793 | 0.0959 | 6.15e-02 | -----    | 9.32e-01 | 2876     | -0.1324 | 0.214  | 9.50e-01 | ++?      | 9.18e-01 | 19311    | -0.1522 | 0.0876 | 8.74e-02  | ++?      | 4.77e-01 |          |
| rs1687556  | 31177697   |          | t      | g | 16421 | 0.0841  | 0.0963 | 8.83e-01 | -----    | 1.62e-01 | 2875     | 0.0142  | 0.1296 | 0.072    | ---      | 9.17e-01 | 19316    | 0.072   | 0.0267 | 4.11e-01  | ---      | 6.17e-01 |          |
| 42         | rs12491561 | 31524957 |        | c | 18808 | 0.0767  | 0.0235 | 1.09e-03 | +++++    | 2.39e-01 | 10357    | 0.0145  | 0.0286 | 6.13e-01 | +++      | 1.14e-01 | 29165    | 0.0516  | 0.0182 | 4.46e-03  | +++      | 9.29e-02 |          |
| rs7652669  | 31525512   |          | c      | g | 16977 | -0.0838 | 0.0239 | 4.47e-04 | -----    | 2.51e-01 | 10358    | -0.0115 | 0.0286 | 6.89e-01 | +++      | 1.20e-01 | 27335    | -0.0518 | 0.0183 | 3.20e-03  | +++      | 5.24e-02 |          |
| rs4390968  | 31526784   |          | a      | g | 18759 | -0.0782 | 0.0235 | 8.92e-04 | -----    | 1.91e-01 | 10360    | -0.013  | 0.0286 | 6.49e-01 | +++      | 1.30e-01 | 29119    | -0.0519 | 0.0182 | 4.24e-03  | +++      | 7.82e-02 |          |
| rs6791590  | 31527257   |          | a      | t | 18752 | 0.0784  | 0.0236 | 8.92e-04 | +++++    | 1.97e-01 | 10361    | 0.0128  | 0.0286 | 6.55e-01 | +++      | 1.26e-01 | 29113    | 0.0518  | 0.0182 | 4.41e-03  | +++      | 7.69e-02 |          |
| 43         | rs2168422  | 31779846 | CSBPLO | t | g     | 18684   | 0.043  | 0.0294   | 2.44e-01 | +++++    | 7.00e-02 | 10279   | 0.0216 | 0.0334   | 5.18e-01 | +++      | 9.84e-01 | 28963   | 0.0337 | 0.0221    | 1.27e-01 | +++      | 6.11e-01 |
| rs7613385  | 31781075   | CSBPLO   | t      | c | 18750 | 0.086   | 0.0288 | 2.79e-03 | +++++    | 4.32e-01 | 10348    | 0.0282  | 0.0329 | 3.91e-01 | +++      | 8.05e-01 | 29098    | 0.0609  | 0.0217 | 4.93e-01  | +++      | 8.38e-01 |          |
| rs17176090 | 31782734   | CSBPLO   | a      | c | 18674 | -0.0448 | 0.0288 | 1.20e-01 | -----    | 4.23e-02 | 10328    | -0.0275 | 0.033  | 4.05e-01 | ---      | 7.64e-01 | 29002    | -0.0373 | 0.0217 | 8.54e-02  | ---      | 6.93e-01 |          |
| rs7796221  | 31782517   | CSBPLO   | t      | g | 18531 | -0.0507 | 0.0304 | 9.52e-02 | -----    | 4.84e-02 | 10263    | -0.025  | 0.0343 | 4.06e-01 | ---      | 4.97e-01 | 28794    | -0.0394 | 0.0228 | 8.34e-02  | ---      | 5.75e-01 |          |
| rs1902338  | 31782985   | CSBPLO   | a      | g | 16497 | -0.0571 | 0.0309 | 6.47e-02 | -----    | 4.35e-02 | 10299    | -0.0115 | 0.0322 | 7.37e-01 | ---      | 8.41e-01 | 26796    | -0.0366 | 0.0229 | 1.10e-01  | ---      | 3.23e-01 |          |
| rs9810972  | 31785033   | CSBPLO   | a      | g | 18642 | 0.0409  | 0.0288 | 1.55e-01 | +++++    | 1.40e-01 | 10322    | 0.0165  | 0.0291 | 5.82e-01 | +++      | 9.45e-01 | 28961    | 0.0343  | 0.0207 | 1.22e-01  | +++      | 1.67e-01 |          |
| rs12497607 | 31786629   | CSBPLO   | a      | g | 16707 | -0.0365 | 0.0297 | 2.20e-01 | -----    | 1.98e-02 | 10350    | -0.031  | 0.0334 | 3.54e-01 | ---      | 6.38e-01 | 27057    | -0.0341 | 0.0222 | 1.25e-01  | ---      | 9.02e-01 |          |
| rs936160   | 31787589   | CSBPLO   | t      | c | 18695 | -0.0427 | 0.0295 | 1.49e-01 | -----    | 6.31e-02 | 10354    | -0.0245 | 0.0337 | 4.67e-01 | ---      | 5.21e-01 | 29049    | -0.0348 | 0.0222 | 1.17e-01  | ---      | 6.85e-01 |          |
| rs2219250  | 31792548   | CSBPLO   | t      | c | 18613 | 0.0828  | 0.0297 | 5.33e-03 | +++++    | 3.81e-01 | 10350    | 0.0255  | 0.0337 | 4.49e-01 | +++      | 5.10e-01 | 28963    | 0.0748  | 0.0223 | 9.55e-03  | +++      | 2.02e-01 |          |
| rs1709187  | 31795688   | CSBPLO   | a      | g | 16572 | -0.0505 | 0.03   | 9.24e-02 | -----    | 3.56e-02 | 10276    | -0.0278 | 0.0339 | 4.12e-01 | ---      | 6.21e-01 | 26848    | -0.0405 | 0.0225 | 7.12e-02  | ---      | 6.16e-01 |          |
| rs12171283 | 31797341   | CSBPLO   | a      | g | 18661 | -0.0571 | 0.0299 | 5.59e-02 | -----    | 1.84e-02 | 10272    | -0.0234 | 0.0344 | 4.97e-01 | ---      | 4.67e-01 | 28933    | -0.0426 | 0.0226 | 5.91e-02  | ---      | 4.60e-01 |          |
| rs1931078  | 31801771   | CSBPLO   | a      | g | 16884 | 0.0573  | 0.0303 | 5.88e-02 | +++++    | 1.06e-02 | 10292    | 0.0243  | 0.0343 | 4.80e-01 | +++      | 5.01e-01 | 27176    | 0.0428  | 0.0227 | 5.93e-02  | +++      | 4.71e-01 |          |
| rs4955200  | 31802319   | CSBPLO   | t      | c | 18565 | 0.0576  | 0.0289 | 4.61e-02 | +++++    | 1.47e-02 | 10264    | 0.0263  | 0.034  | 4.38e-   |          |          |          |         |        |           |          |          |          |

|            |           |         |   |   |       |         |        |          |         |          |       |         |        |          |     |          |       |         |        |          |    |          |
|------------|-----------|---------|---|---|-------|---------|--------|----------|---------|----------|-------|---------|--------|----------|-----|----------|-------|---------|--------|----------|----|----------|
| rs12638086 | 60420613  | FHIT    | t | c | 18773 | -0.0845 | 0.0236 | 3.48E-04 | +++++   | 2.73E-01 | 10360 | -0.0271 | 0.0289 | 3.49E-01 | +++ | 4.20E-01 | 29133 | -0.0615 | 0.0183 | 7.62E-04 | -- | 1.24E-01 |
| rs12638610 | 60420846  | FHIT    | t | c | 18777 | -0.0848 | 0.0236 | 3.29E-04 | +++++   | 1.75E-01 | 10360 | -0.0278 | 0.0289 | 3.36E-01 | +++ | 4.24E-01 | 29137 | -0.062  | 0.0183 | 6.95E-04 | -- | 1.27E-01 |
| rs12638665 | 60421098  | FHIT    | t | c | 18817 | -0.0405 | 0.0236 | 8.60E-02 | +++++   | 2.78E-02 | 10354 | -0.026  | 0.0289 | 3.69E-01 | +++ | 4.14E-01 | 29171 | -0.0347 | 0.0183 | 5.77E-04 | -- | 1.98E-01 |
| rs1579912  | 60422380  | FHIT    | t | g | 18763 | 0.0846  | 0.0232 | 2.66E-04 | +++++   | 4.40E-01 | 10344 | 0.0238  | 0.0287 | 4.07E-01 | +++ | 6.03E-01 | 29107 | 0.0606  | 0.018  | 7.87E-04 | ++ | 9.95E-02 |
| rs15405127 | 6042301   | FHIT    | t | c | 18815 | -0.0812 | 0.0231 | 4.53E-04 | +++++   | 4.53E-01 | 10344 | -0.0238 | 0.0287 | 4.07E-01 | +++ | 6.03E-01 | 29109 | 0.0606  | 0.018  | 1.12E-03 | ++ | 1.19E-01 |
| rs474675   | 6042301   | FHIT    | t | c | 18815 | -0.0889 | 0.0232 | 2.8E-04  | +++++   | 5.11E-01 | 10338 | -0.0234 | 0.0287 | 4.15E-01 | +++ | 5.56E-01 | 29151 | -0.063  | 0.018  | 4.78E-04 | -- | 7.59E-02 |
| rs378446   | 60423631  | FHIT    | a | g | 18769 | -0.0891 | 0.0232 | 1.26E-04 | +++++   | 4.36E-01 | 10343 | -0.0234 | 0.0287 | 4.15E-01 | +++ | 5.56E-01 | 29112 | -0.0631 | 0.018  | 4.67E-04 | -- | 7.50E-02 |
| rs2594239  | 60424049  | FHIT    | c | g | 18754 | 0.081   | 0.0232 | 4.81E-04 | +++++   | 3.46E-01 | 10343 | 0.0242  | 0.0287 | 4.00E-01 | +++ | 5.53E-01 | 29097 | 0.0586  | 0.018  | 1.17E-03 | ++ | 1.24E-01 |
| rs403815   | 60428440  | FHIT    | a | g | 10636 | 0.0886  | 0.0233 | 6.04E-03 | ??+?+?  | 2.67E-01 | 10234 | -0.012  | 0.0288 | 6.76E-01 | +++ | 4.48E-01 | 20870 | 0.0236  | 0.0215 | 1.30E-01 | ++ | 2.01E-02 |
| rs12496632 | 60487512  | FHIT    | t | c | 14983 | -0.1387 | 0.0334 | 3.33E-05 | ----?   | 8.37E-01 | 10330 | 0.0174  | 0.0375 | 6.41E-01 | +++ | 2.80E-01 | 25313 | -0.0696 | 0.0249 | 5.23E-04 | ++ | 1.88E-03 |
| rs4679545  | 60488163  | FHIT    | a | g | 16373 | 0.0882  | 0.034  | 9.45E-03 | +++?+?  | 1.53E-01 | 10341 | -0.0199 | 0.0376 | 5.96E-01 | +++ | 3.45E-01 | 26714 | 0.0396  | 0.0252 | 1.17E-01 | ++ | 3.30E-02 |
| rs12485617 | 60489702  | FHIT    | t | c | 17033 | -0.1217 | 0.0315 | 1.15E-04 | ----?   | 7.31E-01 | 10232 | 0.0134  | 0.0381 | 7.26E-01 | +++ | 2.01E-01 | 27265 | -0.0668 | 0.0243 | 5.90E-03 | ++ | 6.28E-03 |
| rs17063484 | 60496949  | FHIT    | t | g | 14876 | -0.1438 | 0.0341 | 2.50E-05 | ----?   | 8.97E-01 | 10312 | 0.0139  | 0.0371 | 7.08E-01 | +++ | 5.09E-01 | 25188 | -0.0716 | 0.0251 | 4.36E-03 | -- | 1.75E-03 |
| rs9842724  | 63779801  | C3orf99 | t | c | 18684 | -0.0907 | 0.0235 | 1.15E-04 | ----?   | 6.15E-01 | 10239 | -0.0176 | 0.0293 | 6.55E-02 | +++ | 2.52E-01 | 28923 | -0.0354 | 0.0185 | 6.36E-03 | ++ | 6.16E-01 |
| rs13434089 | 63923606  | ATXN1   | t | c | 18608 | -0.0852 | 0.0232 | 2.37E-04 | +++++   | 8.01E-01 | 10353 | 0.0631  | 0.0295 | 3.26E-02 | +++ | 3.96E-01 | 29014 | 0.0768  | 0.0182 | 2.57E-05 | ++ | 5.56E-01 |
| rs13433909 | 63923649  | ATXN1   | t | c | 16508 | 0.0886  | 0.0249 | 3.71E-04 | +++?+?+ | 9.04E-01 | 10211 | 0.0642  | 0.0296 | 3.02E-02 | +++ | 3.21E-01 | 26819 | 0.0785  | 0.0191 | 3.80E-05 | ++ | 5.28E-01 |
| rs33087    | 63988289  | SLC9A9  | t | c | 15348 | 0.1036  | 0.0268 | 1.07E-04 | +++?+?+ | 5.09E-01 | 10158 | 0.0541  | 0.0299 | 7.08E-02 | +++ | 2.56E-01 | 23206 | 0.081   | 0.02   | 4.38E-05 | ++ | 2.18E-01 |
| rs35840    | 63989944  | SLC9A9  | a | c | 14666 | -0.1177 | 0.027  | 1.31E-05 | ----?   | 6.91E-01 | 7863  | -0.0587 | 0.0346 | 8.93E-02 | -?  | 3.76E-01 | 25229 | -0.0954 | 0.0213 | 7.45E-06 | -- | 1.79E-01 |
| rs831574   | 64004423  | SLC9A9  | a | g | 14829 | -0.0998 | 0.0278 | 3.24E-04 | ----?   | 8.70E-02 | 7862  | -0.004  | 0.0337 | 9.06E-01 | -?  | 8.06E-01 | 22701 | -0.0621 | 0.014  | 4.44E-04 | ++ | 2.83E-02 |
| rs831571   | 64023337  | SLC9A9  | t | c | 18783 | -0.1078 | 0.0236 | 4.85E-06 | ----?   | 8.38E-01 | 10231 | -0.0602 | 0.03   | 4.46E-02 | +++ | 4.16E-01 | 29014 | -0.0896 | 0.0185 | 1.36E-06 | -- | 1.21E-01 |
| rs166230   | 64028247  | SLC9A9  | t | g | 16176 | -0.1088 | 0.0256 | 2.20E-05 | ----?   | 7.22E-01 | 10142 | -0.044  | 0.0306 | 1.50E-01 | +++ | 4.06E-01 | 26318 | -0.0821 | 0.0196 | 2.89E-05 | ++ | 1.04E-01 |
| rs12636920 | 65727759  | MAGI2   | a | t | 18657 | 0.0813  | 0.0234 | 2.58E-04 | +++++   | 9.53E-01 | 10248 | 0.0159  | 0.0304 | 6.01E-01 | +++ | 2.83E-01 | 28905 | 0.057   | 0.0185 | 2.13E-03 | ++ | 8.82E-02 |
| rs12631567 | 65727807  | MAGI2   | t | c | 18681 | -0.0855 | 0.0232 | 2.34E-04 | +++++   | 9.14E-01 | 10223 | -0.0126 | 0.0301 | 6.76E-01 | +++ | 2.52E-01 | 29004 | -0.0583 | 0.0184 | 1.50E-03 | ++ | 5.51E-02 |
| rs13078950 | 65731571  | MAGI2   | t | c | 14192 | 0.091   | 0.0272 | 8.27E-04 | +++?+?+ | 9.48E-01 | 10181 | 0.0177  | 0.0304 | 5.60E-01 | +++ | 3.95E-01 | 24773 | 0.0584  | 0.0203 | 3.96E-03 | ++ | 7.44E-02 |
| rs9840838  | 65737292  | MAGI2   | t | c | 18722 | 0.0567  | 0.0236 | 1.44E-02 | +++++   | 4.16E-01 | 10350 | -0.0082 | 0.0298 | 8.36E-01 | +++ | 4.41E-01 | 29072 | -0.0376 | 0.0183 | 3.59E-02 | ++ | 8.81E-01 |
| rs1495453  | 65737587  | MAGI2   | a | g | 16922 | -0.0609 | 0.0236 | 9.85E-03 | ----?   | 3.61E-01 | 10336 | -0.0113 | 0.0298 | 7.06E-01 | +++ | 5.28E-01 | 27258 | -0.0518 | 0.0185 | 2.39E-02 | ++ | 1.92E-01 |
| rs9852224  | 65737750  | MAGI2   | t | c | 12548 | -0.0905 | 0.0275 | 9.91E-04 | ----?   | 7.87E-01 | 10363 | -0.0077 | 0.0298 | 7.96E-01 | +++ | 4.57E-01 | 22911 | -0.0524 | 0.0202 | 9.49E-03 | ++ | 4.12E-02 |
| rs9868785  | 90149113  | SLC9A9  | a | g | 14831 | 0.1106  | 0.0287 | 1.14E-04 | +++?+?+ | 5.35E-01 | 10337 | 0.0159  | 0.0327 | 6.27E-01 | +++ | 3.39E-01 | 25168 | 0.0694  | 0.0216 | 3.30E-03 | ++ | 2.95E-02 |
| rs9877921  | 90191181  | SLC9A9  | t | c | 14762 | 0.1243  | 0.0355 | 4.64E-04 | +++?+?+ | 7.76E-01 | 10341 | 0.0149  | 0.0332 | 6.55E-01 | +++ | 4.33E-01 | 25103 | 0.0659  | 0.0242 | 6.54E-03 | ++ | 2.44E-02 |
| rs6551450  | 90212018  | SLC9A9  | t | c | 10992 | -0.1013 | 0.033  | 2.14E-03 | ----?   | 3.92E-01 | 10322 | -0.0109 | 0.0332 | 7.43E-01 | +++ | 4.48E-01 | 21314 | -0.0564 | 0.024  | 1.60E-03 | ++ | 5.35E-02 |
| rs9877833  | 90221002  | SLC9A9  | a | g | 14824 | 0.1139  | 0.0294 | 1.06E-04 | +++?+?+ | 5.06E-01 | 10309 | 0.0121  | 0.0335 | 7.18E-01 | +++ | 3.07E-01 | 25133 | 0.0686  | 0.0221 | 1.63E-03 | ++ | 2.24E-02 |
| rs9849053  | 90235192  | SLC9A9  | a | g | 10999 | 0.103   | 0.033  | 1.78E-03 | +++?+?+ | 3.78E-01 | 10285 | -0.008  | 0.0326 | 8.06E-01 | +++ | 7.67E-01 | 21284 | 0.0692  | 0.0232 | 4.35E-02 | ++ | 1.67E-02 |
| rs11717504 | 90261770  | SLC9A9  | t | c | 10889 | 0.1174  | 0.0361 | 1.16E-03 | +++?+?+ | 6.63E-01 | 10238 | -0.0129 | 0.0314 | 6.82E-01 | +++ | 5.31E-01 | 21127 | 0.0432  | 0.0237 | 6.81E-02 | ++ | 6.46E-03 |
| rs17653828 | 90263360  | SLC9A9  | t | c | 10997 | -0.1024 | 0.033  | 1.90E-03 | ----?   | 3.55E-01 | 10263 | 0.0148  | 0.0314 | 6.38E-01 | +++ | 8.38E-01 | 21260 | -0.0409 | 0.0227 | 7.23E-02 | ++ | 1.01E-02 |
| rs13072134 | 90272660  | SLC9A9  | t | c | 10982 | -0.1034 | 0.032  | 1.73E-03 | ----?   | 3.56E-01 | 10261 | 0.0092  | 0.0314 | 7.70E-01 | +++ | 7.93E-01 | 21243 | -0.0443 | 0.0227 | 5.15E-02 | ++ | 1.37E-02 |
| rs14729720 | 90310814  | SLC9A9  | t | g | 13043 | 0.1182  | 0.0299 | 7.57E-05 | +++?+?+ | 2.79E-01 | 10275 | -0.0238 | 0.0302 | 4.30E-01 | +++ | 9.88E-01 | 23318 | -0.0479 | 0.0212 | 2.42E-02 | ++ | 8.34E-04 |
| rs9815264  | 90359201  | SLC9A9  | a | g | 13044 | -0.116  | 0.0298 | 9.91E-05 | ----?   | 2.96E-01 | 10244 | 0.0343  | 0.0299 | 2.51E-01 | +++ | 9.49E-01 | 23388 | -0.0411 | 0.0211 | 5.15E-02 | ++ | 3.70E-04 |
| rs1472932  | 90366641  | SLC9A9  | a | g | 11014 | 0.0526  | 0.0328 | 1.09E-01 | +++?+?+ | 7.05E-01 | 10358 | 0.0366  | 0.0299 | 2.22E-01 | +++ | 6.00E-01 | 21372 | 0.0439  | 0.0221 | 4.72E-02 | ++ | 7.19E-01 |
| rs6551461  | 90369007  | SLC9A9  | a | g | 11007 | -0.1107 | 0.0347 | 1.42E-03 | ----?   | 3.41E-01 | 10303 | -0.0329 | 0.0303 | 2.78E-01 | +++ | 5.69E-01 | 21310 | -0.0662 | 0.028  | 5.54E-03 | ++ | 9.13E-02 |
| rs3772028  | 90377463  | SLC9A9  | t | g | 10982 | -0.096  | 0.0332 | 3.78E-03 | +++?+?  | 2.18E-01 | 10320 | -0.0291 | 0.0301 | 3.34E-01 | +++ | 6.89E-01 | 21302 | -0.0593 | 0.0223 | 7.85E-03 | ++ | 1.36E-01 |
| rs7424227  | 90378260  | SLC9A9  | a | t | 11010 | 0.099   | 0.0329 | 2.63E-03 | +++?+?+ | 3.28E-01 | 10300 | 0.0091  | 0.0302 | 7.62E-01 | +++ | 6.94E-01 | 21310 | 0.0502  | 0.0222 | 2.40E-02 | ++ | 4.41E-02 |
| rs11718105 | 124946398 | MYLK    | t | c | 10709 | 0.1175  | 0.1148 | 3.06E-01 | +++?+?+ | 3.84E-01 | 387   | -0.1977 | 0.6804 | 7.71E-01 | -?  | 1.00E+00 | 11096 | 0.0888  | 0.1132 | 3.37E-01 | ++ | 6.48E-01 |
| rs11714297 | 125002269 | MYLK    | t | c | 8540  | 0.0774  | 0.0355 | 5.58E-01 | +++?+?+ | 1.86E-02 | 382   | -0.2919 | 0.4872 | 5.49E-01 | -?  | 1.00E+00 | 8540  | 0.0798  | 0.1355 | 5.58E-01 | +  | 1.00E+00 |
| rs9816400  | 125006336 | MYLK    | t | c | 14434 | -0.0437 | 0.0393 | 6.39E-01 | ---?+?  | 2.52E-02 | 382   | 0.2919  | 0.4872 | 5.49E-01 | +++ | 1.00E+00 | 14016 | -0.0524 | 0.0914 | 8.56E-01 | ++ | 6.17E-01 |
| rs14678086 | 125017928 | MYLK    | t | c | 16769 | 0.0285  | 0.0888 | 7.48E-01 | +++?+?  | 5.06E-02 | 382   | 0.2919  | 0.4872 | 5.49E-01 | +++ | 1.00E+00 | 17151 | 0.037   | 0.0874 | 6.72E-01 | ++ | 5.95E-01 |
| rs11720528 | 125012788 | MYLK    | t | c | 14434 | 0.0387  | 0.0926 | 6.76E-01 | +++?+?  | 3.06E-02 | 382   | 0.2919  | 0.4872 | 5.49E-01 | +++ | 1.00E+00 | 14816 | 0.0475  | 0.091  | 6.01E-01 | ++ | 6.10E-01 |
| rs13733884 | 125016973 | MYLK    | t | c | 12497 | 0.044   | 0.0827 | 9.59E-01 | +++?+?  | 6.43E-02 | 383   | 0.1664  | 0.4723 | 7.25E-01 | +++ | 1.00E+00 | 12880 | 0.0476  | 0.0815 | 5.59E-01 | ++ | 7.99E-01 |
| rs2605417  | 125032085 | MYLK    | a | g | 14445 | -0.2178 | 0.0712 | 2.22E-03 | ----?   | 1.38E-03 | 10358 | 0.0726  | 0.1045 | 4.87E-01 | +++ | 3.45E-01 | 24803 | -0.1257 | 0.0588 | 3.26E-02 | ++ | 2.16E-02 |
| rs2700350  | 125032860 | MYLK    | a | g | 16452 | 0.1632  | 0.0592 | 5.82E-03 | +++?+?  | 1.20E-02 | 10345 | -0.0483 | 0.0936 | 6.06E-01 | +++ | 2.42E-01 | 26797 | 0.1028  | 0.05   | 4.00E-02 | ++ | 5.62E-02 |
| rs2700352  | 125033153 | MYLK    | a | g | 18813 | 0.1183  | 0.0561 | 3.49E-02 | +++++   | 2.06E-03 | 10358 | -0.0473 | 0.1133 | 6.76E-01 | +++ | 2.21E-01 | 29171 | 0.0857  | 0.0503 | 8.83E-02 | ++ | 1.90E-01 |
| rs2700354  | 125034462 | MYLK    | a | g | 18812 | -0.121  | 0.0567 | 3.28E-02 | +++++   | 7.73E-04 | 10358 | 0.0675  | 0.0809 | 4.04E-01 | +++ | 4.38E-01 | 29170 | -0.0589 | 0.0464 | 2.05E-01 | ++ | 5.64E-02 |
| rs2682     |           |         |   |   |       |         |        |          |         |          |       |         |        |          |     |          |       |         |        |          |    |          |

|            |           |           |           |        |   |       |         |        |          |          |          |          |         |        |          |          |          |          |         |        |          |          |          |          |
|------------|-----------|-----------|-----------|--------|---|-------|---------|--------|----------|----------|----------|----------|---------|--------|----------|----------|----------|----------|---------|--------|----------|----------|----------|----------|
| rs344088   | 3         | 158044055 | FLJ16641  | t      | c | 18812 | 0.2231  | 0.0591 | 1.60E-04 | +++++    | 2.13E-03 | 2876     | 0.0088  | 0.1944 | 9.64E-01 | +        | 5.90E-01 | 21688    | 0.205   | 0.0565 | 2.89E-04 | ++       | 2.92E-01 |          |
| rs344091   | 3         | 158046801 | FLJ16641  | t      | c | 16780 | 0.2881  | 0.067  | 1.68E-05 | +++++    | 5.70E-03 | 2876     | 0.0088  | 0.1944 | 9.64E-01 | +        | 5.90E-01 | 21656    | 0.2584  | 0.0633 | 4.50E-05 | ++       | 1.74E-01 |          |
| rs344092   | 3         | 158047014 | FLJ16641  | t      | g | 18810 | -0.2207 | 0.0585 | 1.62E-04 | +++++    | 8.05E-03 | 2876     | -0.0088 | 0.1944 | 9.64E-01 | +        | 5.90E-01 | 21688    | -0.2031 | 0.056  | 2.88E-04 | ++       | 2.97E-01 |          |
| rs414883   | 3         | 158053397 | FLJ16641  | a      | g | 18767 | -0.2158 | 0.0586 | 2.32E-04 | +++++    | 8.43E-03 | 2876     | -0.0088 | 0.1944 | 9.64E-01 | +        | 5.90E-01 | 21643    | -0.1986 | 0.0561 | 4.02E-04 | --       | 3.08E-01 |          |
| rs263301   | 3         | 158053616 | FLJ16641  | a      | g | 18814 | -0.2181 | 0.0585 | 1.91E-04 | +++++    | 7.85E-03 | 2876     | -0.0088 | 0.1944 | 9.64E-01 | +        | 5.90E-01 | 21690    | -0.2007 | 0.056  | 3.40E-04 | --       | 3.05E-01 |          |
| rs493423   | 3         | 158056770 | FLJ16641  | a      | g | 18815 | 0.2143  | 0.0581 | 2.24E-04 | +++++    | 7.00E-03 | 2876     | 0.0088  | 0.1944 | 9.64E-01 | +        | 5.90E-01 | 21678    | 0.1811  | 0.0521 | 5.01E-04 | ++       | 2.09E-01 |          |
| rs861359   | 3         | 158067040 | FLJ16641  | c      | g | 18814 | -0.2178 | 0.0585 | 1.95E-04 | +++++    | 7.98E-03 | 2876     | -0.0088 | 0.1944 | 9.64E-01 | +        | 5.90E-01 | 21690    | -0.2004 | 0.056  | 3.46E-04 | --       | 3.03E-01 |          |
| rs16826858 | 3         | 158061092 | FLJ16641  | a      | g | 18813 | -0.2302 | 0.0584 | 8.10E-05 | +++++    | 1.85E-02 | 2876     | -0.0246 | 0.1951 | 9.00E-01 | +        | 5.71E-01 | 21688    | -0.2133 | 0.0559 | 1.38E-04 | ++       | 1.13E-01 |          |
| rs16826864 | 3         | 158062727 | FLJ16641  | a      | g | 18815 | -0.2185 | 0.0592 | 2.22E-04 | +++++    | 1.87E-03 | 2876     | -0.0088 | 0.1944 | 9.64E-01 | +        | 5.90E-01 | 21691    | -0.2007 | 0.0566 | 3.94E-04 | --       | 3.02E-01 |          |
| rs11927500 | 3         | 158063490 | FLJ16641  | c      | g | 18814 | 0.2168  | 0.0585 | 2.11E-04 | +++++    | 7.32E-03 | 2876     | 0.0088  | 0.1944 | 9.64E-01 | +        | 5.90E-01 | 21690    | 0.1995  | 0.056  | 3.68E-04 | ++       | 3.06E-01 |          |
| rs7630909  | 3         | 158064277 | FLJ16641  | a      | t | 18813 | 0.2165  | 0.0585 | 2.16E-04 | +++++    | 7.19E-03 | 2876     | 0.0088  | 0.1944 | 9.64E-01 | +        | 5.90E-01 | 21689    | 0.1993  | 0.056  | 3.75E-04 | ++       | 3.06E-01 |          |
| rs9878709  | 3         | 158064472 | FLJ16641  | a      | g | 18814 | 0.2097  | 0.0582 | 3.11E-04 | +++++    | 6.13E-03 | 2876     | 0.0088  | 0.1944 | 9.64E-01 | +        | 5.90E-01 | 21690    | 0.1932  | 0.0558 | 5.31E-04 | ++       | 3.22E-01 |          |
| rs641099   | 3         | 158066549 | FLJ16641  | a      | g | 18814 | -0.21   | 0.0582 | 3.08E-04 | +++++    | 6.15E-03 | 2876     | -0.0088 | 0.1944 | 9.64E-01 | +        | 5.90E-01 | 21690    | -0.1934 | 0.0558 | 5.21E-04 | ++       | 3.21E-01 |          |
| rs6411100  | 3         | 158066825 | FLJ16641  | t      | c | 18814 | 0.2082  | 0.0584 | 3.66E-04 | +++++    | 2.08E-02 | 2876     | 0.0088  | 0.1944 | 9.64E-01 | +        | 5.90E-01 | 21690    | 0.1917  | 0.0559 | 6.10E-04 | ++       | 3.26E-01 |          |
| rs6786161  | 3         | 158073984 | FLJ16641  | a      | g | 18815 | 0.2075  | 0.0582 | 3.63E-04 | +++++    | 5.35E-02 | 2876     | 0.0088  | 0.1944 | 9.64E-01 | +        | 5.90E-01 | 21691    | 0.1912  | 0.0558 | 6.07E-04 | ++       | 3.28E-01 |          |
| rs6787535  | 3         | 158091660 | FLJ16641  | a      | g | 18814 | 0.2137  | 0.0585 | 2.62E-04 | +++++    | 6.02E-03 | 2876     | 0.0088  | 0.1944 | 9.64E-01 | +        | 5.90E-01 | 21690    | 0.1967  | 0.056  | 4.46E-04 | ++       | 3.13E-01 |          |
| rs6787952  | 3         | 158092069 | FLJ16641  | a      | g | 18815 | 0.2147  | 0.0592 | 2.86E-04 | +++++    | 1.46E-02 | 2876     | 0.0088  | 0.1944 | 9.64E-01 | +        | 5.90E-01 | 21691    | 0.1972  | 0.0566 | 4.97E-04 | ++       | 3.11E-01 |          |
| rs16826899 | 3         | 158093361 | FLJ16641  | a      | g | 18815 | 0.2274  | 0.0578 | 8.47E-05 | +++++    | 1.61E-02 | 2873     | 0.0091  | 0.196  | 9.63E-01 | +        | 5.89E-01 | 21688    | 0.2099  | 0.0554 | 1.53E-04 | ++       | 2.85E-01 |          |
| rs13321802 | 3         | 158094022 | FLJ16641  | a      | g | 18815 | 0.2064  | 0.0582 | 3.89E-04 | +++++    | 4.94E-03 | 2876     | 0.0088  | 0.1944 | 9.64E-01 | +        | 5.90E-01 | 21691    | 0.1901  | 0.0558 | 6.64E-04 | ++       | 3.30E-01 |          |
| rs6792917  | 3         | 158104087 | FLJ16641  | a      | g | 18815 | 0.2067  | 0.0582 | 3.83E-04 | +++++    | 4.79E-03 | 2876     | 0.0088  | 0.1944 | 9.64E-01 | +        | 5.90E-01 | 21691    | 0.1904  | 0.0558 | 6.37E-04 | ++       | 3.29E-01 |          |
| rs6795327  | 3         | 158104242 | FLJ16641  | a      | g | 18815 | 0.2148  | 0.0592 | 2.85E-04 | +++++    | 1.40E-02 | 2876     | 0.0088  | 0.1944 | 9.64E-01 | +        | 5.90E-01 | 21691    | 0.1973  | 0.0566 | 4.94E-04 | ++       | 3.11E-01 |          |
| rs6795516  | 3         | 158104373 | FLJ16641  | t      | c | 18815 | 0.2163  | 0.0592 | 2.59E-04 | +++++    | 1.29E-02 | 2876     | 0.0088  | 0.1944 | 9.64E-01 | +        | 5.90E-01 | 21691    | 0.1987  | 0.0566 | 4.51E-04 | ++       | 3.07E-01 |          |
| rs6763644  | 3         | 158106050 | FLJ16641  | t      | g | 17032 | -0.1546 | 0.0617 | 1.22E-02 | +++++    | 2.93E-02 | 2876     | -0.0088 | 0.1944 | 9.64E-01 | +        | 5.90E-01 | 19908    | -0.1413 | 0.0588 | 1.63E-02 | ++       | 4.75E-01 |          |
| rs8002042  | 3         | 158106159 | FLJ16641  | t      | c | 14446 | 0.2636  | 0.0693 | 1.43E-04 | +++++    | 2.60E-03 | 2876     | 0.0088  | 0.1944 | 9.64E-01 | +        | 5.90E-01 | 17322    | 0.2349  | 0.0653 | 3.21E-04 | ++       | 2.17E-01 |          |
| rs16836966 | 3         | 158113133 | FLJ16641  | c      | g | 18817 | -0.2166 | 0.0583 | 2.05E-04 | +++++    | 3.58E-03 | 2874     | 0.0456  | 0.1936 | 3.54E-01 | +        | 5.95E-01 | 21691    | -0.1948 | 0.0588 | 6.50E-02 | ++       | 1.95E-01 |          |
| rs2874490  | 3         | 158118207 | FLJ16641  | a      | g | 18817 | 0.2392  | 0.0592 | 2.59E-05 | +++++    | 5.37E-03 | 2875     | 0.0246  | 0.1951 | 9.00E-01 | +        | 5.71E-01 | 21692    | 0.2211  | 0.0566 | 9.50E-05 | ++       | 2.92E-01 |          |
| rs7609851  | 3         | 158121197 | FLJ16641  | a      | g | 18817 | -0.2217 | 0.0592 | 1.83E-04 | +++++    | 1.10E-02 | 2876     | -0.0088 | 0.1944 | 9.64E-01 | +        | 5.90E-01 | 21693    | -0.2036 | 0.0566 | 3.24E-04 | --       | 2.95E-01 |          |
| rs7635521  | 3         | 158122404 | FLJ16641  | a      | g | 18815 | 0.21    | 0.0582 | 3.12E-04 | +++++    | 2.24E-02 | 2876     | 0.0088  | 0.1944 | 9.64E-01 | +        | 5.90E-01 | 21691    | 0.1934  | 0.0558 | 5.21E-04 | ++       | 3.21E-01 |          |
| rs7650127  | 3         | 158125328 | FLJ16641  | a      | g | 18813 | -0.2173 | 0.0586 | 2.11E-04 | +++++    | 2.92E-03 | 2876     | -0.0088 | 0.1944 | 9.64E-01 | +        | 5.90E-01 | 21689    | -0.1999 | 0.0561 | 3.66E-04 | --       | 3.05E-01 |          |
| rs6441103  | 3         | 158126079 | FLJ16641  | a      | g | 18796 | -0.2223 | 0.0587 | 1.54E-04 | +++++    | 3.62E-03 | 2876     | -0.0088 | 0.1944 | 9.64E-01 | +        | 5.90E-01 | 21672    | -0.2045 | 0.0562 | 2.74E-04 | --       | 2.93E-01 |          |
| rs2874491  | 3         | 158131805 | FLJ16641  | t      | c | 18815 | -0.2208 | 0.0593 | 1.95E-04 | +++++    | 1.07E-03 | 2876     | -0.0088 | 0.1944 | 9.64E-01 | +        | 5.90E-01 | 21691    | -0.2208 | 0.0567 | 3.51E-04 | --       | 2.97E-01 |          |
| rs6802511  | 3         | 158136616 | FLJ16641  | c      | g | 18733 | 0.2308  | 0.0587 | 8.47E-05 | +++++    | 2.64E-03 | 2876     | 0.0088  | 0.1944 | 9.64E-01 | +        | 5.90E-01 | 21609    | 0.2123  | 0.0562 | 1.59E-04 | ++       | 2.74E-01 |          |
| rs6441104  | 3         | 158141335 | FLJ16641  | a      | g | 18814 | 0.224   | 0.0592 | 1.55E-04 | +++++    | 1.12E-03 | 2876     | 0.0088  | 0.1944 | 9.64E-01 | +        | 5.90E-01 | 21690    | 0.2057  | 0.0566 | 2.80E-04 | ++       | 2.90E-01 |          |
| rs16826948 | 3         | 158164468 | FLJ16641  | t      | c | 18814 | -0.2243 | 0.0592 | 1.52E-04 | +++++    | 1.13E-03 | 2876     | -0.0088 | 0.1944 | 9.64E-01 | +        | 5.90E-01 | 21690    | -0.2056 | 0.0566 | 2.75E-04 | --       | 2.89E-01 |          |
| rs6743233  | 3         | 158165805 | FLJ16641  | t      | c | 18814 | -0.2229 | 0.0592 | 1.56E-04 | +++++    | 1.16E-03 | 2876     | -0.0088 | 0.1944 | 9.64E-01 | +        | 5.90E-01 | 21690    | -0.2056 | 0.0566 | 2.82E-04 | --       | 2.90E-01 |          |
| 61         | rs488209  | 3         | 174602072 | NLGN1  | a | 14829 | 0.1165  | 0.0273 | 1.96E-05 | +++++    | 2.22E-01 | 10313    | 0.0402  | 0.0308 | 1.92E-01 | ++       | 6.28E-01 | 25142    | 0.0829  | 0.0204 | 4.92E-05 | ++       | 6.38E-02 |          |
| rs536445   | 3         | 174602797 | NLGN1     | t      | c | 14728 | 0.1162  | 0.0271 | 1.83E-05 | +++++    | 1.50E-01 | 10345    | 0.0313  | 0.0305 | 3.05E-01 | ++       | 8.36E-01 | 25073    | 0.0787  | 0.0203 | 1.02E-04 | ++       | 3.75E-02 |          |
| rs992367   | 3         | 175128323 | NLGN1     | c      | g | 6847  | -0.0469 | 0.0244 | 2.68E-01 | ?????    | 3.34E-02 | 9862     | -0.0049 | 0.0306 | 8.72E-01 | ??       | 9.12E-01 | 16709    | -0.0193 | 0.0248 | 4.37E-01 | ++       | 4.22E-01 |          |
| rs963350   | 3         | 175164600 | NLGN1     | t      | c | 14827 | -0.1113 | 0.0266 | 2.80E-05 | +++++    | 8.85E-03 | 7873     | 0.003   | 0.034  | 9.29E-01 | ??       | 7.13E-01 | 22700    | -0.0979 | 0.021  | 1.93E-01 | ++       | 8.10E-03 |          |
| rs16833234 | 3         | 175293651 | NLGN1     | t      | c | 14830 | 0.0949  | 0.0262 | 2.87E-04 | +++++    | 7.98E-01 | 7875     | 0.0063  | 0.0343 | 8.54E-01 | ??       | 8.75E-01 | 22705    | 0.0623  | 0.0208 | 2.79E-03 | ++       | 4.01E-02 |          |
| 62         | rs9842394 | 3         | 181109590 | PKSL   | t | c     | 18780   | 0.1158 | 0.0309   | 1.79E-04 | +++++    | 2.06E-02 | 10356   | 0.0063 | 0.0435   | 8.85E-01 | ++       | 9.71E-01 | 19136   | 0.0791 | 0.0252   | 1.70E-03 | ++       | 4.02E-02 |
| rs9836757  | 3         | 181124915 | PKSL      | t      | c | 18638 | 0.1168  | 0.0301 | 1.03E-04 | +++++    | 4.18E-02 | 10357    | -0.0272 | 0.0431 | 5.29E-01 | ++       | 7.04E-01 | 28995    | 0.0696  | 0.0267 | 4.80E-03 | ++       | 6.16E-03 |          |
| rs11748664 | 3         | 181132205 | PKSL      | t      | c | 18686 | 0.1002  | 0.03   | 8.35E-04 | +++++    | 1.58E-02 | 10361    | -0.0447 | 0.0462 | 3.33E-01 | ++       | 8.50E-01 | 29047    | 0.0592  | 0.0242 | 2.30E-02 | ++       | 8.53E-03 |          |
| rs1416789  | 3         | 181167899 | PKSL      | a      | g | 18645 | 0.1099  | 0.0301 | 2.60E-04 | +++++    | 2.46E-02 | 10347    | -0.047  | 0.0461 | 3.29E-01 | ++       | 8.16E-01 | 28992    | 0.0636  | 0.0252 | 1.16E-02 | ++       | 4.90E-03 |          |
| rs16830940 | 3         | 181140955 | PKSL      | a      | g | 12507 | 0.1113  | 0.0363 | 2.19E-04 | +++++    | 1.63E-02 | 10347    | -0.0417 | 0.0461 | 3.29E-01 | ++       | 8.03E-01 | 28554    | 0.0572  | 0.0285 | 6.50E-02 | ++       | 9.03E-03 |          |
| rs7634072  | 3         | 181144012 | PKSL      | a      | g | 18686 | 0.1009  | 0.0301 | 8.08E-04 | +++++    | 2.62E-02 | 10357    | 0.0013  | 0.0421 | 9.76E-01 | ++       | 5.39E-01 | 29043    | 0.0623  | 0.0245 | 6.05E-03 | ++       | 5.43E-02 |          |
| 63         | rs6784185 | 3         | 186955759 | IGFBP2 | a | g     | 18804   | 0.1001 | 0.0268   | 1.88E-04 | +++++    | 3.72E-01 | 10326   | 0.0694 | 0.0352   | 4.84E-02 | ++       | 5.21E-03 | 29130   | 0.0888 | 0.0213   | 3.10E-05 | ++       | 4.88E-01 |
| rs7684050  | 3         | 186955826 | IGFBP2    | t      | c | 18779 | 0.1011  | 0.0268 | 1.62E-04 | +++++    | 3.66E-01 | 10329    | 0.0572  | 0.0346 | 9.83E-02 | ++       | 7.02E-03 | 29108    | 0.0846  | 0.0212 | 6.48E-05 | ++       | 3.16E-01 |          |
| rs6799330  | 3         | 186961651 | IGFBP2    | t      | g | 18751 | -0.0995 | 0.0269 | 2.10E-04 | +++++    | 3.66E-01 | 10342    | -0.0083 | 0.0303 | 7.83E-01 | ++       | 2.96E-02 | 29093    | -0.0593 | 0.0201 | 3.20E-03 | ++       | 2.44E-02 |          |
| rs6789741  | 3         | 186962427 | IGFBP2    | t      | g | 18736 | 0.0971  | 0.0269 | 3.05E-04 | +++++    | 3.11E-   |          |         |        |          |          |          |          |         |        |          |          |          |          |

|            |            |          |          |        |       |         |         |          |          |          |          |          |         |          |          |          |          |          |         |          |          |          |          |          |
|------------|------------|----------|----------|--------|-------|---------|---------|----------|----------|----------|----------|----------|---------|----------|----------|----------|----------|----------|---------|----------|----------|----------|----------|----------|
| rs7690771  | 4          | 21623733 | a        | g      | 16821 | -0.0497 | 0.0285  | 8.14e-02 | ---+?--  | 2.13e-01 | 10361    | -0.0251  | 0.0348  | 4.70e-01 | +++      | 8.50e-01 | 27182    | -0.0398  | 0.022   | 7.09e-02 | --       | 5.84e-01 |          |          |
| rs1513574  | 4          | 21625239 | a        | g      | 10662 | -0.048  | 0.0351  | 1.71e-01 | ---+?--  | 4.80e-01 | 10352    | -0.0428  | 0.0358  | 2.31e-01 | +++      | 8.03e-01 | 21014    | -0.0455  | 0.0251  | 6.98e-02 | --       | 9.17e-01 |          |          |
| rs13125289 | 4          | 21626265 | a        | g      | 14482 | 0.0573  | 0.0311  | 6.53e-02 | ---+?--  | 2.35e-01 | 10353    | 0.0382   | 0.0362  | 2.91e-01 | +++      | 6.64e-01 | 24835    | -0.0492  | 0.0376  | 3.71e-02 | --       | 6.97e-01 |          |          |
| rs2015779  | 4          | 21637770 | t        | c      | 18605 | -0.0748 | 0.0261  | 4.12e-03 | ---+?--  | 2.30e-02 | 10265    | -0.0519  | 0.0362  | 1.51e-01 | +++      | 7.68e-01 | 28870    | -0.067   | 0.0212  | 1.56e-03 | --       | 6.08e-01 |          |          |
| rs175778   | 4          | 21657874 | a        | g      | 18744 | 0.0752  | 0.026   | 3.82e-03 | ---+?--  | 2.37e-02 | 10340    | 0.0472   | 0.0361  | 1.91e-01 | +++      | 7.03e-01 | 28904    | 0.056    | 0.0211  | 1.86e-03 | ++       | 5.29e-01 |          |          |
| rs1652833  | 4          | 21658584 | a        | g      | 18739 | -0.0747 | 0.026   | 4.04e-03 | ---+?--  | 2.56e-02 | 10357    | -0.0519  | 0.0322  | 1.71e-01 | +++      | 9.95e-01 | 29082    | -0.0499  | 0.0202  | 1.36e-03 | ++       | 1.29e-01 |          |          |
| rs7567801  | 4          | 21655334 | a        | g      | 12497 | -0.0831 | 0.0315  | 8.37e-03 | ---+?--  | 1.17e-02 | 10341    | -0.0173  | 0.0325  | 5.94e-01 | ---      | 9.70e-01 | 22838    | -0.0512  | 0.0226  | 2.35e-02 | --       | 1.46e-01 |          |          |
| rs13106072 | 4          | 21653470 | a        | g      | 16404 | -0.069  | 0.028   | 1.38e-02 | ---+?--  | 1.53e-02 | 10341    | -0.0155  | 0.0326  | 6.34e-01 | ---      | 9.73e-01 | 26745    | -0.0463  | 0.0212  | 2.93e-02 | --       | 2.13e-01 |          |          |
| rs6836373  | 4          | 21654727 | a        | g      | 18739 | 0.0757  | 0.026   | 3.58e-03 | ---+?--  | 2.51e-02 | 10322    | 0.0324   | 0.0326  | 6.51e-01 | +++      | 9.62e-01 | 29071    | 0.052    | 0.0203  | 1.05e-02 | ++       | 1.44e-01 |          |          |
| rs6839252  | 4          | 21655010 | c        | g      | 16705 | -0.1019 | 0.0281  | 2.92e-04 | ---+?--  | 1.18e-01 | 10326    | -0.0149  | 0.0326  | 6.49e-01 | ---      | 9.63e-01 | 27031    | -0.0648  | 0.0213  | 2.33e-02 | ++       | 4.32e-02 |          |          |
| rs12510345 | 4          | 21661915 | a        | g      | 16730 | -0.0448 | 0.0274  | 1.02e-01 | ---+?--  | 1.87e-01 | 10305    | -0.0296  | 0.0304  | 3.30e-01 | ---      | 6.90e-01 | 27035    | -0.038   | 0.0204  | 6.20e-02 | --       | 7.10e-01 |          |          |
| rs17345664 | 4          | 21662382 | t        | c      | 16725 | -0.0455 | 0.0274  | 9.70e-02 | ---+?--  | 1.90e-01 | 10305    | -0.0205  | 0.0298  | 4.91e-01 | ---      | 7.40e-01 | 27030    | -0.0324  | 0.0202  | 9.14e-02 | ---      | 5.37e-01 |          |          |
| 71         | rs1626840  | 4        | 42533105 | t      | c     | 18815   | 0.0918  | 0.0249   | 2.27e-04 | -----    | 6.11e-01 | 10362    | -0.0363 | 0.0322   | 2.60e-01 | 0        | 1.37e-01 | 29177    | 0.0439  | 0.0197   | 2.60e-02 | ++       | 1.65e-03 |          |
| rs1200251  | 4          | 42545916 | t        | c      | 18795 | 0.0755  | 0.0256  | 3.15e-03 | -----    | 5.99e-01 | 10363    | -0.0249  | 0.0381  | 5.14e-01 | +++      | 8.99e-02 | 29158    | 0.0403   | 0.0212  | 3.72e-02 | ++       | 2.87e-02 |          |          |
| rs10938223 | 4          | 42549703 | a        | g      | 18815 | 0.0821  | 0.0229  | 3.36e-04 | -----    | 1.99e-02 | 10372    | -0.0394  | 0.0359  | 5.24e-01 | ---      | 4.27e-01 | 21688    | 0.0643   | 0.0211  | 2.29e-03 | ++       | 4.67e-02 |          |          |
| rs10004231 | 4          | 42552330 | t        | c      | 18813 | -0.0798 | 0.0229  | 4.80e-04 | -----    | 2.04e-01 | 10371    | 0.0371   | 0.0359  | 4.92e-01 | +++      | 4.38e-01 | 21688    | -0.0619  | 0.0211  | 3.30e-03 | ++       | 4.59e-02 |          |          |
| rs11730312 | 4          | 42557311 | c        | g      | 18803 | 0.077   | 0.0255  | 2.59e-03 | -----    | 7.27e-01 | 10358    | -0.0281  | 0.0309  | 3.63e-01 | ---      | 1.26e-01 | 01614    | 0.0347   | 0.0197  | 8.01e-02 | ++       | 8.71e-03 |          |          |
| rs6850606  | 4          | 42559453 | a        | g      | 18794 | -0.0759 | 0.0255  | 2.96e-03 | -----    | 7.32e-01 | 10357    | 0.0164   | 0.032   | 6.08e-01 | ---      | 7.92e-02 | 01521    | -0.0401  | 0.0199  | 4.46e-02 | ++       | 2.41e-02 |          |          |
| 72         | rs1512128  | 4        | 46593834 | a      | c     | 18743   | -0.1351 | 0.0427   | 1.56e-03 | -----    | 8.72e-01 | 10344    | -0.0066 | 0.0457   | 8.85e-01 | ---      | 9.79e-01 | 29087    | -0.0752 | 0.0312   | 1.59e-02 | ---      | 3.99e-02 |          |
| rs7960061  | 4          | 46601198 | a        | t      | 18797 | -0.1342 | 0.0425  | 1.58e-03 | -----    | 8.83e-01 | 10344    | -0.0066  | 0.0457  | 8.85e-01 | ---      | 9.79e-01 | 01941    | -0.075   | 0.0311  | 1.59e-02 | ---      | 4.09e-02 |          |          |
| rs16859669 | 4          | 46602060 | t        | c      | 14824 | -0.1376 | 0.0484  | 4.46e-03 | ---+?--  | 8.40e-01 | 10344    | -0.0066  | 0.0457  | 8.85e-01 | ---      | 9.79e-01 | 25168    | -0.0683  | 0.0332  | 3.97e-02 | ---      | 4.91e-02 |          |          |
| rs17641147 | 4          | 46604292 | t        | c      | 16763 | -0.1297 | 0.0451  | 4.06e-03 | ---+?--  | 8.81e-01 | 10344    | -0.0066  | 0.0457  | 8.85e-01 | ---      | 9.79e-01 | 27107    | -0.069   | 0.0321  | 3.17e-02 | ---      | 5.52e-02 |          |          |
| rs2351168  | 4          | 46601925 | t        | g      | 18795 | -0.1392 | 0.0426  | 1.08e-03 | -----    | 9.03e-01 | 10344    | -0.0066  | 0.0457  | 8.85e-01 | ---      | 9.79e-01 | 01939    | -0.0775  | 0.0312  | 1.28e-02 | ---      | 3.38e-02 |          |          |
| rs9952303  | 4          | 46614384 | GABRA4   | t      | c     | 18793   | 0.139   | 0.0426   | 1.10e-03 | -----    | 9.01e-01 | 10352    | 0.006   | 0.0457   | 8.96e-01 | +++      | 9.84e-01 | 01945    | 0.0772  | 0.0312   | 1.33e-02 | ++       | 3.33e-02 |          |
| rs15121347 | 4          | 46626376 | GABRA4   | a      | g     | 16458   | -0.1574 | 0.0474   | 9.98e-04 | -----    | 8.94e-01 | 10352    | 0.006   | 0.0457   | 8.96e-01 | +++      | 9.84e-01 | 01945    | 0.0772  | 0.0312   | 1.33e-02 | ++       | 3.33e-02 |          |
| rs6815456  | 4          | 46627316 | GABRA4   | a      | g     | 18793   | 0.1402  | 0.0426   | 9.91e-04 | -----    | 8.91e-01 | 10352    | 0.006   | 0.0457   | 8.96e-01 | +++      | 9.84e-01 | 01945    | 0.0772  | 0.0312   | 1.25e-02 | ++       | 3.17e-02 |          |
| rs12508647 | 4          | 46628711 | GABRA4   | c      | g     | 18794   | 0.1408  | 0.0426   | 9.41e-04 | -----    | 8.89e-01 | 10353    | 0.0062  | 0.0457   | 8.93e-01 | +++      | 9.82e-01 | 01947    | 0.0782  | 0.0312   | 1.21e-02 | ++       | 3.12e-02 |          |
| rs10024134 | 4          | 46629556 | GABRA4   | t      | c     | 18799   | 0.1424  | 0.0425   | 7.99e-04 | -----    | 8.86e-01 | 10357    | 0.005   | 0.0457   | 9.13e-01 | +++      | 9.89e-01 | 01956    | 0.0787  | 0.0311   | 1.15e-02 | ++       | 2.77e-02 |          |
| rs1877397  | 4          | 46632377 | GABRA4   | a      | g     | 18799   | 0.1424  | 0.0425   | 8.15e-04 | -----    | 8.65e-01 | 10357    | 0.005   | 0.0457   | 9.13e-01 | +++      | 9.89e-01 | 01956    | 0.0787  | 0.0311   | 1.15e-02 | ++       | 2.77e-02 |          |
| rs10018276 | 4          | 46636923 | GABRA4   | t      | c     | 14824   | -0.1417 | 0.0485   | 3.47e-03 | ---+?--  | 8.08e-01 | 10357    | -0.005  | 0.0457   | 9.13e-01 | ---      | 9.89e-01 | 25181    | -0.0693 | 0.0333   | 3.72e-02 | ---      | 4.02e-02 |          |
| rs1877403  | 4          | 46647212 | GABRA4   | t      | c     | 18801   | -0.1433 | 0.0425   | 7.54e-04 | -----    | 8.62e-01 | 10357    | -0.0087 | 0.0461   | 8.50e-01 | ---      | 9.95e-01 | 01958    | -0.0615 | 0.0312   | 9.14e-03 | ---      | 3.18e-02 |          |
| rs1398175  | 4          | 46644635 | GABRA4   | t      | g     | 18785   | -0.1424 | 0.0425   | 8.07e-04 | -----    | 9.30e-01 | 10357    | -0.0087 | 0.0461   | 8.50e-01 | ---      | 9.95e-01 | 01958    | -0.0615 | 0.0312   | 9.14e-03 | ---      | 3.18e-02 |          |
| rs1398176  | 4          | 46644483 | GABRA4   | t      | g     | 18810   | -0.1422 | 0.0425   | 8.16e-04 | -----    | 8.70e-01 | 10357    | -0.0087 | 0.0461   | 8.50e-01 | ---      | 9.97e-01 | 01961    | -0.0615 | 0.0312   | 9.14e-03 | ---      | 3.18e-02 |          |
| rs7666667  | 4          | 46645470 | GABRA4   | t      | c     | 18809   | 0.1416  | 0.0426   | 8.75e-04 | -----    | 8.81e-01 | 10357    | 0.005   | 0.0457   | 9.13e-01 | +++      | 9.97e-01 | 01961    | -0.0615 | 0.0312   | 9.14e-03 | ---      | 3.18e-02 |          |
| rs6896865  | 4          | 46646786 | GABRA4   | a      | g     | 18726   | -0.1386 | 0.0434   | 4.40e-03 | ---+?--  | 8.47e-01 | 10357    | -0.006  | 0.0457   | 9.13e-01 | ---      | 9.97e-01 | 01961    | -0.0615 | 0.0312   | 9.14e-03 | ---      | 3.18e-02 |          |
| rs7695616  | 4          | 46648003 | GABRA4   | t      | c     | 18813   | -0.1503 | 0.0424   | 3.94e-04 | -----    | 7.68e-01 | 10357    | -0.0179 | 0.0457   | 9.13e-01 | ---      | 9.86e-01 | 01678    | -0.126  | 0.0383   | 1.01e-03 | ---      | 1.81e-01 |          |
| rs16851641 | 4          | 46647090 | GABRA4   | a      | g     | 18810   | -0.1419 | 0.0425   | 8.32e-04 | -----    | 8.43e-01 | 10357    | -0.0241 | 0.0457   | 9.13e-01 | ---      | 9.93e-01 | 01679    | -0.126  | 0.0383   | 1.01e-03 | ---      | 1.81e-01 |          |
| rs16859751 | 4          | 46647816 | GABRA4   | t      | c     | 18805   | -0.1417 | 0.0427   | 9.15e-04 | -----    | 8.81e-01 | 10358    | -0.0097 | 0.0457   | 9.13e-01 | ---      | 9.85e-01 | 01963    | -0.08   | 0.0312   | 1.02e-02 | ---      | 3.46e-02 |          |
| rs7685553  | 4          | 46648254 | GABRA4   | t      | c     | 18805   | 0.1439  | 0.0427   | 7.47e-04 | -----    | 8.61e-01 | 10357    | 0.0027  | 0.0457   | 9.13e-01 | +++      | 9.97e-01 | 01676    | 0.1212  | 0.0383   | 1.64e-03 | ++       | 2.19e-01 |          |
| rs12505347 | 4          | 46649834 | GABRA4   | t      | c     | 16770   | 0.1331  | 0.0455   | 3.46e-03 | ---+?--  | 8.63e-01 | 10357    | 0.0027  | 0.0457   | 9.13e-01 | +++      | 9.97e-01 | 01961    | 0.1102  | 0.0405   | 6.52e-03 | ++       | 2.69e-01 |          |
| 73         | rs12503480 | 4        | 73122656 | NPPFR2 | t     | c       | 16421   | 0.0928   | 0.0262   | 3.93e-04 | -----    | 4.40e-01 | 9935    | -0.0427  | 0.0386   | 1.63e-01 | ?        | 9.22e-01 | 26356   | 0.0359   | 0.0199   | 7.44e-02 | ++       | 7.69e-04 |
| rs13107558 | 4          | 73125670 | NPPFR2   | c      | g     | 16420   | 0.0913  | 0.0263   | 1.73e-04 | -----    | 3.68e-01 | 9934     | -0.0182 | 0.0294   | 5.35e-01 | ?        | 7.40e-01 | 26654    | 0.0469  | 0.0187   | 1.24e-02 | ++       | 4.09e-03 |          |
| rs7695255  | 4          | 73126973 | NPPFR2   | a      | g     | 16700   | 0.0941  | 0.0243   | 3.53e-04 | -----    | 3.41e-01 | 9935     | -0.0186 | 0.0294   | 5.26e-01 | ?        | 7.13e-01 | 26441    | 0.0404  | 0.0196   | 2.48e-02 | ++       | 4.28e-03 |          |
| rs7670209  | 4          | 73127071 | NPPFR2   | c      | g     | 16744   | -0.0901 | 0.0243   | 2.07e-04 | -----    | 3.72e-01 | 9965     | 0.0166  | 0.0293   | 5.71e-01 | ?        | 5.90e-01 | 26709    | 0.0466  | 0.0187   | 1.27e-02 | ++       | 5.06e-03 |          |
| rs7670216  | 4          | 73127071 | NPPFR2   | c      | g     | 16745   | -0.0892 | 0.0243   | 2.07e-04 | -----    | 3.72e-01 | 9965     | 0.0166  | 0.0293   | 5.71e-01 | ?        | 5.90e-01 | 26709    | 0.0466  | 0.0187   | 1.27e-02 | ++       | 5.06e-03 |          |
| rs13121468 | 4          | 73127294 | NPPFR2   | t      | c     | 16423   | -0.0803 | 0.0228   | 4.25e-04 | -----    | 3.54e-01 | 9966     | 0.0176  | 0.0293   | 5.48e-01 | ?        | 5.90e-01 | 26709    | 0.0434  | 0.018    |          |          |          |          |



|    |            |   |           |   |   |       |         |        |          |         |          |       |         |        |          |          |          |          |         |        |          |          |          |          |
|----|------------|---|-----------|---|---|-------|---------|--------|----------|---------|----------|-------|---------|--------|----------|----------|----------|----------|---------|--------|----------|----------|----------|----------|
|    | rs12643619 | 4 | 75625891  | t | c | 14135 | -0.0573 | 0.0314 | 6.78E-02 | -----?? | 3.80E-03 | 10250 | -0.0036 | 0.0326 | 9.12E-01 | ++       | 5.10E-01 | 24385    | -0.0315 | 0.0226 | 1.64E-01 | --       | 2.36E-01 |          |
|    | rs6447006  | 4 | 75628191  | a | g | 16772 | -0.0465 | 0.0278 | 9.40E-02 | -----?+ | 6.61E-03 | 10340 | -0.0163 | 0.0335 | 6.26E-01 | ++       | 3.50E-01 | 27112    | -0.0342 | 0.0214 | 1.10E-01 | --       | 4.88E-01 |          |
| 76 | rs689040   | 4 | 87988115  | c | g | 12714 | 0.1791  | 0.0702 | 1.12E-02 | +++++?? | 6.13E-01 | 7844  | -0.3911 | 0.1637 | 1.76E-02 | -?       | 4.69E-01 | 20558    | 0.0906  | 0.0646 | 1.61E-01 | ++       | 1.48E-03 |          |
|    | rs1497768  | 4 | 82954871  | a | t | 16548 | 0.16    | 0.0478 | 8.14E-04 | +++++?? | 1.34E-01 | 7868  | -0.08   | 0.0772 | 3.00E-01 | -?       | 1.38E-02 | 24416    | 0.0935  | 0.0406 | 2.14E-02 | ++       | 8.21E-03 |          |
|    | rs12643522 | 4 | 85731222  | g | t | 18656 | -0.1563 | 0.0442 | 4.08E-04 | -----?? | 1.80E-01 | 7873  | 0.0653  | 0.0765 | 3.94E-01 | -?       | 3.08E-01 | 26528    | -0.1008 | 0.0383 | 8.42E-03 | ++       | 1.21E-02 |          |
| 77 | rs7659871  | 4 | 85702451  | t | c | 18813 | -0.072  | 0.0239 | 2.56E-03 | -----?? | 3.94E-01 | 10263 | 0.0363  | 0.0111 | 0.0287   | 0.03E-01 | ++       | 2.23E-01 | 9176    | 0.047  | 0.0184   | 1.05E-02 | ++       | 1.02E-01 |
|    | rs7678268  | 4 | 85703738  | t | c | 18789 | 0.059   | 0.0238 | 1.33E-02 | +++++?? | 2.59E-01 | 10326 | 0.0217  | 0.0289 | 4.53E-01 | ++       | 3.32E-01 | 29115    | 0.0439  | 0.0184 | 1.68E-02 | ++       | 3.19E-01 |          |
|    | rs4494005  | 4 | 85704353  | a | g | 16452 | -0.0811 | 0.0259 | 1.76E-03 | -----?+ | 4.34E-01 | 10340 | -0.0223 | 0.0289 | 4.40E-01 | ++       | 2.30E-01 | 26792    | -0.0549 | 0.0193 | 4.42E-03 | ++       | 1.30E-01 |          |
|    | rs4533768  | 4 | 85704655  | g | t | 18787 | 0.0649  | 0.0239 | 6.53E-03 | +++++?? | 2.38E-01 | 10327 | 0.0238  | 0.0289 | 4.09E-01 | ++       | 3.27E-01 | 29114    | 0.0482  | 0.0184 | 8.86E-03 | ++       | 2.73E-01 |          |
|    | rs6355544  | 4 | 85705077  | a | c | 18794 | 0.0612  | 0.0239 | 1.04E-02 | +++++?? | 1.54E-01 | 10340 | 0.0216  | 0.0289 | 4.53E-01 | ++       | 2.37E-01 | 29134    | 0.0451  | 0.0184 | 1.83E-02 | ++       | 2.91E-01 |          |
|    | rs6750366  | 4 | 85705965  | t | c | 16470 | 0.0868  | 0.0258 | 7.54E-04 | +++++?? | 7.64E-01 | 10331 | 0.0217  | 0.0289 | 4.53E-01 | ++       | 3.23E-01 | 26801    | -0.0579 | 0.0192 | 2.61E-03 | ++       | 2.92E-01 |          |
|    | rs1109652  | 4 | 85708656  | c | g | 14946 | -0.0687 | 0.0256 | 7.41E-03 | -----?+ | 1.03E-01 | 10318 | -0.0238 | 0.0289 | 4.10E-01 | ++       | 3.04E-01 | 25264    | -0.0499 | 0.0192 | 1.06E-02 | ++       | 4.25E-01 |          |
|    | rs1109653  | 4 | 85709521  | c | g | 18643 | 0.0712  | 0.0238 | 2.82E-03 | +++++?? | 2.77E-01 | 10324 | 0.0227  | 0.0288 | 4.30E-01 | ++       | 1.93E-01 | 28967    | 0.0515  | 0.0183 | 5.98E-03 | ++       | 1.94E-01 |          |
|    | rs10776519 | 4 | 85710291  | g | t | 16322 | -0.1014 | 0.0238 | 8.69E-05 | -----?+ | 8.31E-01 | 10332 | -0.0226 | 0.0288 | 4.34E-01 | ++       | 1.20E-01 | 26654    | -0.0663 | 0.0192 | 4.59E-04 | ++       | 4.16E-02 |          |
|    | rs12643523 | 4 | 85712722  | t | c | 18666 | 0.0761  | 0.0239 | 1.42E-03 | +++++?? | 2.43E-01 | 10274 | 0.022   | 0.0288 | 4.45E-01 | ++       | 9.74E-02 | 29000    | 0.054   | 0.0184 | 3.30E-03 | ++       | 1.48E-01 |          |
|    | rs2868914  | 4 | 85715785  | t | c | 14775 | 0.0523  | 0.0268 | 5.05E-02 | +++++?? | 6.16E-02 | 10212 | 0.0154  | 0.0289 | 5.94E-01 | ++       | 8.84E-02 | 25087    | -0.0352 | 0.0197 | 7.29E-02 | ++       | 3.49E-01 |          |
|    | rs2868915  | 4 | 85716071  | t | c | 12764 | -0.0693 | 0.0287 | 1.56E-02 | -----?+ | 1.41E-01 | 10355 | -0.0211 | 0.0288 | 4.63E-01 | ++       | 7.45E-02 | 23119    | -0.0453 | 0.0203 | 2.59E-02 | ++       | 2.36E-01 |          |
|    | rs2868917  | 4 | 85719225  | t | c | 12982 | -0.0632 | 0.0272 | 1.99E-02 | -----?+ | 1.16E-01 | 10332 | -0.0218 | 0.0288 | 4.50E-01 | ++       | 1.20E-01 | 23314    | -0.0437 | 0.0198 | 2.72E-02 | ++       | 2.96E-01 |          |
|    | rs11097023 | 4 | 85724498  | t | c | 14832 | -0.0705 | 0.0269 | 8.85E-03 | -----?+ | 1.95E-01 | 10262 | -0.012  | 0.0291 | 6.81E-01 | ++       | 1.04E-01 | 25094    | -0.0438 | 0.0198 | 2.75E-02 | ++       | 1.40E-01 |          |
|    | rs11725339 | 4 | 85728173  | a | g | 8843  | -0.0362 | 0.0358 | 3.11E-01 | ????+?? | 1.57E-01 | 10290 | -0.0119 | 0.0292 | 6.83E-01 | ++       | 8.50E-02 | 19133    | -0.0216 | 0.0226 | 3.40E-01 | ++       | 5.90E-01 |          |
| 78 | rs1514733  | 4 | 91883046  | t | c | 14832 | 0.0919  | 0.0255 | 3.22E-04 | +++++?? | 4.53E-01 | 10363 | 0.0151  | 0.0286 | 5.99E-01 | ++       | 6.00E-01 | 25195    | 0.0759  | 0.0191 | 2.36E-03 | ++       | 4.50E-02 |          |
|    | rs6843193  | 4 | 91884426  | a | g | 14793 | 0.0565  | 0.0255 | 2.68E-02 | +++++?? | 2.92E-02 | 10320 | 0.0152  | 0.0357 | 6.70E-01 | ++       | 3.09E-01 | 25113    | 0.0425  | 0.0208 | 4.03E-02 | ++       | 3.47E-01 |          |
|    | rs11932857 | 4 | 91934031  | a | g | 10324 | -0.0419 | 0.0312 | 1.80E-01 | -----?+ | 3.28E-01 | 10159 | -0.0025 | 0.029  | 9.30E-01 | ++       | 3.12E-01 | 20483    | -0.0208 | 0.0212 | 3.28E-02 | ++       | 3.55E-01 |          |
|    | rs7438052  | 4 | 91935637  | a | c | 4512  | -0.0385 | 0.0555 | 4.88E-01 | ????+?? | 6.16E-01 | 7487  | -0.018  | 0.0358 | 5.94E-01 | ??       | 1.00E+00 | 11999    | -0.0235 | 0.0289 | 4.15E-01 | ++       | 7.52E-01 |          |
|    | rs2852086  | 4 | 91936008  | a | c | 16446 | -0.0285 | 0.0248 | 2.50E-01 | -----?+ | 1.36E-01 | 10359 | -0.0098 | 0.0289 | 7.30E-01 | ++       | 3.28E-01 | 28136    | -0.0481 | 0.0178 | 6.95E-03 | ++       | 4.49E-01 |          |
|    | rs12168076 | 4 | 91939223  | t | c | 14131 | 0.0038  | 0.027  | 8.88E-01 | +++++?? | 7.32E-02 | 10156 | 0.0011  | 0.029  | 9.71E-01 | ++       | 3.15E-01 | 24287    | 0.0205  | 0.0198 | 8.98E-01 | ++       | 9.46E-01 |          |
|    | rs1213957  | 4 | 91939429  | t | c | 14512 | -0.0081 | 0.0268 | 7.62E-01 | -----?+ | 5.71E-02 | 10156 | 0.0055  | 0.029  | 8.49E-01 | ++       | 2.67E-01 | 24668    | -0.0108 | 0.0197 | 9.26E-01 | ++       | 7.31E-01 |          |
|    | rs12168077 | 4 | 91939662  | t | c | 16231 | 0.0199  | 0.025  | 4.27E-01 | +++++?? | 1.57E-01 | 10232 | -0.0031 | 0.0289 | 9.13E-01 | ++       | 2.27E-01 | 26463    | -0.0119 | 0.0189 | 5.95E-01 | ++       | 5.47E-01 |          |
|    | rs11097267 | 4 | 91940596  | a | t | 18813 | 0.0348  | 0.0229 | 1.29E-01 | +++++?? | 2.49E-02 | 10216 | -0.0018 | 0.0289 | 9.51E-01 | ++       | 3.29E-01 | 29029    | -0.0207 | 0.0179 | 2.49E-01 | ++       | 3.21E-01 |          |
|    | rs1213960  | 4 | 91940938  | t | c | 18762 | -0.0289 | 0.0229 | 2.07E-01 | -----?+ | 3.06E-02 | 10229 | 0.0044  | 0.0289 | 8.79E-01 | ++       | 2.31E-01 | 28991    | -0.0161 | 0.0179 | 3.71E-01 | ++       | 3.67E-01 |          |
|    | rs1213961  | 4 | 91940963  | a | g | 18784 | 0.0353  | 0.0229 | 1.23E-01 | +++++?? | 4.39E-02 | 10216 | -0.002  | 0.0289 | 9.46E-01 | ++       | 3.35E-01 | 29000    | -0.0209 | 0.0179 | 2.44E-01 | ++       | 3.12E-01 |          |
|    | rs1377918  | 4 | 91941262  | a | g | 17011 | 0.0402  | 0.0234 | 8.61E-02 | +++++?? | 2.96E-02 | 10228 | -0.0053 | 0.0289 | 8.55E-01 | ++       | 2.48E-01 | 27239    | 0.0222  | 0.0182 | 2.32E-01 | ++       | 2.21E-01 |          |
|    | rs1377919  | 4 | 91941548  | a | t | 14427 | -0.0044 | 0.0268 | 8.69E-01 | +++++?? | 3.83E-01 | 10232 | -0.006  | 0.0289 | 8.36E-01 | ++       | 2.45E-01 | 24659    | -0.0051 | 0.0197 | 7.94E-01 | ++       | 9.68E-01 |          |
|    | rs10516878 | 4 | 91943890  | a | g | 18811 | -0.0351 | 0.0229 | 1.26E-01 | +++++?? | 2.37E-02 | 10237 | 0.0007  | 0.0288 | 8.08E-01 | ++       | 3.27E-01 | 29048    | -0.0188 | 0.0179 | 2.94E-01 | ++       | 2.53E-01 |          |
| 79 | rs2073017  | 4 | 110819267 | t | c | 18517 | 0.0691  | 0.0229 | 2.60E-02 | +++++?? | 1.57E-01 | 10330 | 0.0146  | 0.0284 | 6.24E-01 | ++       | 6.36E-01 | 28794    | -0.0476 | 0.0179 | 7.78E-03 | ++       | 1.33E-01 |          |
|    | rs5234444  | 4 | 110780555 | t | c | 16961 | -0.0648 | 0.0233 | 5.30E-03 | -----?+ | 1.75E-01 | 10315 | -0.0114 | 0.0285 | 6.89E-01 | ++       | 7.56E-01 | 27276    | -0.0434 | 0.018  | 1.61E-02 | ++       | 1.47E-01 |          |
|    | rs12504784 | 4 | 110787207 | a | g | 16349 | -0.0851 | 0.0246 | 5.51E-04 | -----?+ | 2.41E-01 | 10323 | -0.0082 | 0.0285 | 7.74E-01 | ++       | 8.18E-01 | 26672    | -0.0528 | 0.0186 | 0.03E-01 | ++       | 4.11E-02 |          |
|    | rs10010159 | 4 | 110787247 | t | c | 18774 | -0.0717 | 0.0228 | 1.67E-03 | -----?+ | 1.42E-01 | 10358 | -0.0077 | 0.0285 | 7.86E-01 | ++       | 8.03E-01 | 29132    | -0.0467 | 0.0178 | 8.68E-03 | ++       | 7.95E-02 |          |
|    | rs9990765  | 4 | 110788160 | t | c | 18779 | 0.0706  | 0.0228 | 1.97E-03 | +++++?? | 1.36E-01 | 10359 | 0.0078  | 0.0285 | 7.85E-01 | ++       | 8.02E-01 | 29138    | -0.0461 | 0.0178 | 9.63E-03 | ++       | 8.53E-02 |          |
|    | rs9993532  | 4 | 110788540 | t | c | 18779 | 0.071   | 0.0228 | 1.87E-03 | +++++?? | 1.40E-01 | 10359 | 0.0078  | 0.0285 | 7.85E-01 | ++       | 8.02E-01 | 29138    | -0.0463 | 0.0178 | 9.25E-03 | ++       | 8.33E-02 |          |
|    | rs726585   | 4 | 110788996 | t | c | 18778 | -0.0711 | 0.0228 | 1.84E-03 | -----?+ | 1.39E-01 | 10359 | -0.0078 | 0.0285 | 7.85E-01 | ++       | 8.02E-01 | 29137    | -0.0464 | 0.0178 | 9.16E-03 | ++       | 8.29E-02 |          |
|    | rs9996730  | 4 | 110789544 | t | c | 18778 | 0.0712  | 0.0228 | 1.81E-03 | +++++?? | 1.38E-01 | 10359 | 0.0078  | 0.0285 | 7.85E-01 | ++       | 8.02E-01 | 29137    | -0.0465 | 0.0178 | 9.07E-03 | ++       | 8.24E-02 |          |
|    | rs1029449  | 4 | 110789716 | t | c | 18778 | -0.0712 | 0.0228 | 1.81E-03 | -----?+ | 1.38E-01 | 10359 | -0.0078 | 0.0285 | 7.85E-01 | ++       | 8.02E-01 | 29137    | -0.0465 | 0.0178 | 9.07E-03 | ++       | 8.24E-02 |          |
|    | rs9825905  | 4 | 110793192 | t | c | 16301 | -0.0919 | 0.0247 | 2.01E-04 | -----?+ | 1.93E-01 | 10278 | -0.0083 | 0.0286 | 7.71E-01 | ++       | 7.65E-01 | 26579    | -0.0562 | 0.0187 | 2.65E-03 | ++       | 2.70E-02 |          |
|    | rs6851190  | 4 | 110794027 | t | c | 18777 | -0.0726 | 0.0228 | 1.46E-03 | -----?+ | 1.36E-01 | 10359 | -0.0098 | 0.0285 | 7.93E-01 | ++       | 7.55E-01 | 28136    | -0.0481 | 0.0178 | 6.95E-03 | ++       | 4.49E-01 |          |
|    | rs6523445  | 4 | 110794058 | a | g | 18762 | -0.045  | 0.0228 | 4.90E-02 | -----?+ | 1.53E-02 | 10349 | -0.     |        |          |          |          |          |         |        |          |          |          |          |

|            |   |           |                     |   |   |       |         |        |          |       |          |       |         |        |          |     |          |       |         |        |          |     |          |
|------------|---|-----------|---------------------|---|---|-------|---------|--------|----------|-------|----------|-------|---------|--------|----------|-----|----------|-------|---------|--------|----------|-----|----------|
| rs1023962  | 4 | 153670806 | FBXW7               | t | g | 18714 | 0.0781  | 0.0227 | 5.94e-04 | +++++ | 2.37e-01 | 9973  | 0.0517  | 0.029  | 7.45e-02 | 7++ | 6.58e-01 | 28687 | 0.0681  | 0.0179 | 1.40e-04 | ++  | 4.74e-01 |
| rs1484879  | 4 | 153675078 | DKFZ34340714, FBXW7 | a | g | 18692 | 0.0779  | 0.0227 | 6.15e-04 | +++++ | 2.39e-01 | 9973  | 0.0502  | 0.029  | 8.32e-02 | 7++ | 6.36e-01 | 28665 | 0.0674  | 0.0179 | 1.64e-04 | ++  | 4.52e-01 |
| rs6832998  | 4 | 153690116 |                     | a | t | 18562 | 0.0847  | 0.0229 | 2.16e-04 | +++++ | 1.13e-01 | 10329 | 0.0315  | 0.015  | 2.68e-01 | ++  | 4.79e-01 | 28891 | 0.0637  | 0.0178 | 3.50e-04 | ++  | 4.54e-01 |
| rs469135   | 4 | 153730038 |                     | t | c | 16645 | 0.0856  | 0.0243 | 4.30e-04 | +++++ | 1.42e-01 | 9883  | 0.03    | 0.0292 | 3.05e-01 | 7++ | 7.70e-01 | 26528 | 0.0668  | 0.0187 | 7.66e-04 | ++  | 1.43e-01 |
| rs1680783  | 4 | 153730038 |                     | a | g | 16691 | 0.0955  | 0.0243 | 4.39e-05 | +++++ | 2.68e-01 | 9877  | 0.032   | 0.0292 | 2.56e-01 | 7++ | 9.46e-01 | 26568 | 0.07    | 0.0187 | 1.78e-04 | ++  | 1.30e-01 |
| rs1676833  | 4 | 153732819 |                     | a | t | 16665 | -0.0981 | 0.0244 | 4.72e-05 | +++++ | 2.68e-01 | 9870  | 0.0402  | 0.0294 | 1.72e-01 | 7++ | 9.93e-01 | 26535 | -0.0745 | 0.0188 | 7.28e-05 | ++  | 1.30e-01 |
| rs4696327  | 4 | 153735030 |                     | g | c | 16549 | 0.089   | 0.0245 | 2.73e-04 | +++++ | 1.78e-01 | 9839  | 0.0398  | 0.0291 | 1.72e-01 | 7++ | 9.42e-01 | 26388 | 0.0686  | 0.0187 | 2.52e-04 | ++  | 1.96e-01 |
| rs10020796 | 4 | 153739231 |                     | t | c | 16468 | 0.0936  | 0.0246 | 1.40e-04 | +++++ | 1.57e-01 | 9868  | 0.036   | 0.0292 | 2.18e-01 | 7++ | 8.13e-01 | 26336 | 0.0697  | 0.0188 | 2.12e-04 | ++  | 1.31e-01 |
| rs6813195  | 4 | 153739925 |                     | t | c | 18815 | -0.0874 | 0.0227 | 1.20e-04 | ----- | 2.60e-01 | 9973  | -0.0289 | 0.0289 | 3.18e-01 | 7-- | 9.95e-01 | 28788 | -0.0651 | 0.0179 | 2.67e-04 | --  | 1.11e-01 |
| rs817587   | 4 | 15437618  |                     | a | g | 16420 | 0.0981  | 0.0271 | 2.93e-04 | +++++ | 1.71e-01 | 10332 | 0.0061  | 0.0339 | 8.56e-01 | ++  | 8.54e-01 | 26752 | 0.0622  | 0.0212 | 3.28e-04 | ++  | 3.40e-02 |
| rs6822903  | 4 | 15437975  |                     | a | g | 16640 | -0.0007 | 0.0272 | 9.81e-01 | +++++ | 3.76e-05 | 10324 | -0.0025 | 0.0339 | 9.42e-01 | ++  | 8.31e-01 | 26964 | -0.0014 | 0.0212 | 9.47e-01 | ++  | 9.67e-01 |
| rs6539906  | 4 | 15439696  |                     | a | g | 18732 | -0.0607 | 0.0252 | 1.62e-02 | ----- | 1.72e-01 | 10198 | -0.0106 | 0.0342 | 7.58e-01 | --- | 9.26e-01 | 28920 | -0.0431 | 0.0203 | 3.28e-04 | --- | 2.38e-01 |
| rs2711283  | 4 | 161172446 |                     | t | c | 10140 | 0.1191  | 0.0416 | 4.17e-03 | +++++ | 6.84e-01 | 9851  | -0.0089 | 0.0391 | 8.20e-01 | 7-- | 9.27e-01 | 19991 | 0.0711  | 0.0285 | 2.72e-04 | --- | 2.50e-02 |
| rs2711274  | 4 | 161192589 |                     | t | c | 14803 | 0.1163  | 0.0331 | 4.49e-04 | +++++ | 7.03e-01 | 9857  | -0.011  | 0.0447 | 8.06e-01 | 7-- | 1.00e+00 | 22290 | 0.0512  | 0.0266 | 7.42e-03 | --- | 2.21e-02 |
| rs2712273  | 4 | 161319002 |                     | t | c | 14832 | 0.1198  | 0.0352 | 3.05e-04 | +++++ | 6.36e-01 | 9865  | -0.0095 | 0.0395 | 1.00e+00 | 7?0 | 1.00e+00 | 22318 | 0.071   | 0.0266 | 3.82e-03 | 0   | 6.79e-02 |
| rs2727448  | 4 | 181646514 |                     | a | g | 18708 | 0.0452  | 0.0269 | 9.32e-02 | +++++ | 2.52e-02 | 10343 | -0.0285 | 0.0301 | 3.42e-01 | --- | 3.66e-02 | 29051 | 0.0125  | 0.0201 | 5.24e-01 | --- | 6.79e-02 |
| rs2727449  | 4 | 181647694 |                     | a | g | 4512  | 0.0611  | 0.0632 | 3.33e-01 | +++++ | 3.79e-02 | 7487  | 0.007   | 0.0338 | 8.36e-01 | 7+0 | 1.00e+00 | 11999 | 0.0119  | 0.0298 | 5.23e-01 | ++  | 4.50e-01 |
| rs2727450  | 4 | 181648854 |                     | t | c | 16734 | 0.0409  | 0.0281 | 1.46e-01 | +++++ | 4.60e-02 | 10348 | -0.0462 | 0.0294 | 1.16e-01 | --- | 5.99e-02 | 27082 | -0.0097 | 0.0203 | 9.73e-01 | --- | 3.22e-02 |
| rs2546573  | 4 | 181649549 |                     | t | c | 18730 | 0.0502  | 0.0269 | 6.20e-02 | +++++ | 2.70e-02 | 10348 | -0.0399 | 0.0298 | 1.80e-01 | --- | 4.06e-02 | 29078 | 0.0097  | 0.02   | 6.26e-01 | --- | 2.48e-02 |
| rs2546572  | 4 | 181651341 |                     | c | g | 16757 | 0.0777  | 0.028  | 5.45e-03 | +++++ | 4.71e-01 | 10355 | -0.03   | 0.0303 | 3.23e-01 | --- | 3.29e-02 | 27112 | 0.0281  | 0.0206 | 1.72e-01 | --- | 9.04e-03 |
| rs3095962  | 4 | 181656252 |                     | t | c | 12395 | -0.076  | 0.0339 | 2.50e-02 | ----- | 7.96e-03 | 10124 | 0.0287  | 0.0235 | 3.77e-01 | ++  | 1.57e-03 | 22519 | -0.0214 | 0.0235 | 3.61e-01 | --- | 2.58e-02 |
| rs2546570  | 4 | 181660102 |                     | g | c | 18797 | -0.0504 | 0.0268 | 6.05e-02 | ----- | 3.42e-02 | 10338 | 0.0171  | 0.0327 | 6.02e-01 | --- | 9.92e-03 | 29135 | -0.0233 | 0.0207 | 2.61e-01 | --- | 1.10e-01 |
| rs2546614  | 4 | 181663353 |                     | g | c | 14825 | -0.1086 | 0.0301 | 3.04e-04 | ----- | 4.60e-01 | 10338 | 0.0161  | 0.0327 | 6.23e-01 | ++  | 1.21e-02 | 25163 | -0.0514 | 0.0221 | 2.03e-02 | --- | 5.02e-03 |
| rs2727413  | 4 | 181666872 |                     | g | c | 18635 | 0.0836  | 0.0268 | 1.42e-03 | +++++ | 4.04e-01 | 10324 | -0.0246 | 0.0328 | 4.53e-01 | --- | 1.13e-02 | 28959 | 0.0415  | 0.0208 | 4.56e-02 | --- | 9.28e-03 |
| rs2727414  | 4 | 181666872 |                     | a | g | 16479 | -0.0832 | 0.0253 | 9.86e-04 | ----- | 8.32e-01 | 9929  | -0.0109 | 0.0296 | 9.71e-01 | 7+  | 3.29e-01 | 2451  | -0.0487 | 0.0192 | 3.12e-01 | --- | 3.08e-02 |
| rs3796649  | 4 | 188154024 |                     | c | g | 18807 | 0.0843  | 0.0223 | 2.90e-04 | +++++ | 9.06e-01 | 9966  | -0.007  | 0.0298 | 8.12e-01 | 7-- | 2.80e-01 | 28773 | 0.0494  | 0.0183 | 7.00e-03 | --- | 1.54e-02 |
| rs2964727  | 5 | 6219717   |                     | a | t | 18810 | -0.0792 | 0.0491 | 1.07e-01 | ----- | 8.49e-03 | 2875  | 0.0135  | 0.0156 | 8.98e-01 | ++  | 2.00e-02 | 21685 | -0.0627 | 0.0445 | 1.59e-01 | --- | 4.26e-01 |
| rs1428747  | 5 | 6219973   |                     | c | g | 18805 | 0.0703  | 0.0483 | 1.46e-01 | +++++ | 6.28e-02 | 2876  | -0.0183 | 0.0156 | 8.63e-01 | ++  | 1.90e-02 | 21681 | -0.055  | 0.039  | 2.11e-01 | --- | 4.46e-01 |
| rs2937799  | 5 | 6220264   |                     | g | c | 18814 | 0.071   | 0.0483 | 1.41e-01 | +++++ | 6.66e-03 | 10362 | 0.0644  | 0.0633 | 3.09e-01 | ++  | 4.37e-02 | 29176 | 0.0686  | 0.0384 | 7.41e-02 | --- | 9.34e-01 |
| rs7445173  | 5 | 6223934   |                     | t | c | 18813 | 0.0705  | 0.0483 | 1.44e-01 | +++++ | 6.66e-03 | 10362 | 0.0627  | 0.0631 | 3.21e-01 | ++  | 4.45e-02 | 29175 | 0.0676  | 0.0384 | 7.79e-02 | --- | 9.22e-01 |
| rs11745623 | 5 | 6229413   |                     | c | g | 18800 | 0.0687  | 0.0484 | 1.56e-01 | +++++ | 6.98e-03 | 2874  | -0.0143 | 0.0156 | 8.92e-01 | ++  | 1.98e-02 | 21674 | -0.0543 | 0.044  | 2.17e-01 | --- | 4.75e-01 |
| rs2937798  | 5 | 6231155   |                     | t | c | 16461 | -0.1662 | 0.0513 | 1.20e-03 | ----- | 2.91e-01 | 2808  | 0.0355  | 0.0167 | 7.39e-01 | ++  | 1.57e-02 | 19269 | -0.1283 | 0.0462 | 5.51e-03 | --- | 8.84e-02 |
| rs2964722  | 5 | 6232771   |                     | c | g | 18774 | -0.17   | 0.0484 | 4.50e-04 | ----- | 3.25e-01 | 10361 | -0.0521 | 0.0632 | 4.10e-01 | ++  | 4.88e-02 | 29135 | -0.1264 | 0.0384 | 1.00e-03 | --- | 1.39e-01 |
| rs2964716  | 5 | 6234008   |                     | a | g | 14149 | -0.0054 | 0.0556 | 9.23e-01 | +++++ | 1.37e-02 | 7276  | -0.0134 | 0.1108 | 9.04e-01 | ++  | 4.44e-02 | 16875 | -0.007  | 0.0497 | 8.88e-01 | --- | 9.49e-01 |
| rs2937797  | 5 | 6236277   |                     | t | c | 18770 | 0.0512  | 0.0488 | 2.94e-01 | +++++ | 6.26e-03 | 10328 | 0.0636  | 0.0639 | 3.20e-01 | ++  | 6.29e-02 | 29088 | 0.0589  | 0.0388 | 1.51e-01 | --- | 1.51e-01 |
| rs2937789  | 5 | 6241709   |                     | t | c | 18662 | 0.0383  | 0.0499 | 4.43e-01 | +++++ | 8.83e-03 | 10325 | 0.0722  | 0.0643 | 2.62e-01 | ++  | 4.71e-02 | 28897 | 0.051   | 0.0394 | 1.95e-01 | --- | 6.77e-01 |
| rs2937785  | 5 | 6250044   |                     | t | c | 18816 | -0.152  | 0.0509 | 7.65e-01 | ----- | 1.03e-01 | 10362 | -0.0754 | 0.0648 | 2.45e-01 | ++  | 3.91e-02 | 29178 | -0.0382 | 0.04   | 3.40e-01 | --- | 4.65e-01 |
| rs16884022 | 5 | 10094023  |                     | a | c | 10618 | -0.0716 | 0.0298 | 1.64e-02 | ----- | 7.45e-01 | 10338 | 0.0043  | 0.0301 | 8.86e-01 | --- | 2.88e-01 | 29556 | -0.034  | 0.0212 | 1.08e-01 | --- | 7.31e-02 |
| rs11740157 | 5 | 10094128  |                     | a | g | 14778 | 0.0449  | 0.0263 | 8.82e-02 | +++++ | 4.47e-01 | 10363 | 0.0018  | 0.0301 | 9.52e-01 | ++  | 2.45e-01 | 20141 | 0.0262  | 0.0198 | 1.85e-01 | --- | 2.81e-01 |
| rs11738850 | 5 | 10095771  |                     | t | c | 16777 | 0.0694  | 0.0243 | 4.32e-03 | +++++ | 2.48e-01 | 10347 | -0.0144 | 0.0304 | 6.35e-01 | --- | 2.76e-01 | 27124 | 0.0367  | 0.019  | 5.30e-02 | --- | 3.31e-02 |
| rs7729241  | 5 | 10097149  |                     | a | g | 18803 | -0.0894 | 0.0229 | 9.08e-05 | ----- | 1.19e-01 | 10354 | -0.0209 | 0.0292 | 4.76e-01 | ++  | 1.57e-01 | 29157 | -0.0633 | 0.018  | 4.42e-04 | --- | 6.19e-02 |
| rs16884037 | 5 | 10097397  |                     | a | g | 16433 | 0.0755  | 0.0244 | 1.97e-03 | +++++ | 4.45e-01 | 10354 | 0.0102  | 0.0305 | 7.39e-01 | ++  | 2.75e-01 | 26787 | 0.05    | 0.0191 | 8.66e-03 | --- | 9.46e-02 |
| rs2786930  | 5 | 27938515  |                     | t | c | 14633 | 0.0225  | 0.0379 | 5.53e-01 | +++++ | 6.47e-02 | 9972  | -0.0109 | 0.0364 | 7.65e-01 | 7+  | 3.49e-01 | 24605 | 0.0051  | 0.0263 | 8.41e-01 | ++  | 5.25e-01 |
| rs956306   | 5 | 27940408  |                     | t | c | 14636 | -0.0261 | 0.038  | 4.92e-01 | +++++ | 6.47e-02 | 9972  | -0.0102 | 0.0366 | 7.80e-01 | 7+  | 3.79e-01 | 24611 | -0.0073 | 0.0264 | 7.83e-01 | ++  | 4.91e-01 |
| rs1469439  | 5 | 27940555  |                     | g | c | 12522 | -0.0061 | 0.0414 | 8.49e-01 | +++++ | 6.47e-02 | 9971  | -0.0109 | 0.0365 | 7.71e-01 | 7+  | 3.34e-01 | 24541 | -0.0087 | 0.0275 | 5.12e-01 | --- | 9.33e-01 |
| rs1711654  | 5 | 27944483  |                     | g | c | 14679 | -0.0292 | 0.0377 | 4.40e-01 | +++++ | 5.07e-02 | 9971  | 0.0266  | 0.0374 | 4.77e-01 | ++  | 4.57e-01 | 24650 | -0.0011 | 0.0266 | 9.68e-01 | --- | 2.93e-01 |

|            |   |           |   |   |       |         |        |          |         |          |       |         |        |          |     |          |       |         |        |          |     |          |
|------------|---|-----------|---|---|-------|---------|--------|----------|---------|----------|-------|---------|--------|----------|-----|----------|-------|---------|--------|----------|-----|----------|
| rs10040195 | 5 | 113174830 | t | c | 18541 | 0.0992  | 0.0235 | 2.45E-05 | +++++   | 7.27E-02 | 10334 | 0.0232  | 0.0289 | 4.21E-01 | ++  | 4.66E-01 | 28875 | 0.0689  | 0.0182 | 1.56E-04 | ++  | 4.13E-02 |
| rs2128317  | 5 | 113175231 | t | c | 18622 | 0.0945  | 0.0232 | 4.58E-05 | +++++   | 1.70E-02 | 10333 | 0.0242  | 0.0286 | 3.98E-01 | ++  | 4.26E-01 | 28955 | 0.0668  | 0.018  | 2.19E-04 | ++  | 5.63E-02 |
| rs694762   | 5 | 113176166 | t | c | 18790 | -0.0919 | 0.0231 | 7.00E-05 | -----   | 9.60E-03 | 10329 | -0.0208 | 0.0286 | 4.69E-01 | ++  | 3.41E-01 | 29119 | -0.0638 | 0.018  | 3.83E-04 | --  | 5.31E-02 |
| rs1384282  | 5 | 113177023 | t | c | 18813 | 0.0865  | 0.023  | 1.74E-04 | +++++   | 1.88E-02 | 10360 | 0.019   | 0.0286 | 5.05E-01 | ++  | 3.56E-01 | 29173 | 0.06    | 0.0179 | 8.17E-04 | ++  | 6.59E-02 |
| rs1213377  | 5 | 113177377 | t | c | 18659 | 0.0478  | 0.0237 | 4.32E-02 | +++++   | 3.16E-04 | 10353 | 0       | 0.0294 | 1.90E-00 | ++  | 5.27E-01 | 29012 | 0.029   | 0.0185 | 1.16E-01 | 0   | 2.06E-01 |
| rs10055433 | 5 | 113177785 | a | g | 18696 | -0.045  | 0.0232 | 3.8E-01  | -----   | 8.69E-05 | 10353 | -0.0114 | 0.0287 | 6.90E-01 | ++  | 3.39E-01 | 29029 | -0.0254 | 0.011  | 1.67E-01 | ++  | 5.31E-01 |
| rs17136028 | 5 | 113178099 | a | g | 10747 | -0.1105 | 0.0327 | 7.20E-04 | ??-?-?  | 4.75E-01 | 10265 | 0.0035  | 0.0292 | 9.06E-01 | ++  | 5.01E-01 | 21012 | -0.0471 | 0.0218 | 3.07E-02 | ++  | 9.31E-03 |
| rs13355972 | 5 | 113178595 | a | g | 10754 | 0.1024  | 0.0327 | 1.75E-03 | ??+?+?  | 6.01E-01 | 10223 | -0.0005 | 0.0291 | 9.87E-01 | 0   | 4.00E-01 | 20977 | 0.045   | 0.0217 | 3.86E-02 | ++  | 1.87E-02 |
| 98         |   |           |   |   |       |         |        |          |         |          |       |         |        |          |     |          |       |         |        |          |     |          |
| rs12518149 | 5 | 11320726  | a | t | 16726 | 0.0944  | 0.0265 | 3.58E-04 | +++++?+ | 7.75E-01 | 10234 | 0.0266  | 0.0315 | 3.99E-01 | ++  | 2.57E-01 | 26960 | 0.0663  | 0.0203 | 1.08E-03 | ++  | 9.96E-02 |
| rs17424081 | 5 | 113238402 | c | g | 16766 | 0.0415  | 0.0263 | 1.14E-01 | ??+?+?  | 3.79E-02 | 10354 | 0.0278  | 0.0313 | 3.75E-01 | ++  | 3.43E-01 | 27120 | 0.0358  | 0.0201 | 7.52E-02 | ++  | 7.38E-01 |
| rs975704   | 5 | 113238768 | c | g | 18786 | 0.0901  | 0.0246 | 2.44E-04 | +++++   | 8.08E-01 | 10357 | 0.0273  | 0.0313 | 3.82E-01 | ++  | 3.35E-01 | 29143 | 0.0661  | 0.0193 | 6.29E-04 | ++  | 1.15E-01 |
| rs1482483  | 5 | 113239111 | a | g | 18811 | -0.042  | 0.0245 | 8.69E-02 | -----   | 4.49E-02 | 10357 | -0.026  | 0.0313 | 4.06E-01 | ++  | 3.76E-01 | 29168 | -0.0359 | 0.0193 | 6.62E-04 | --  | 6.87E-01 |
| rs1743869  | 5 | 113240869 | a | g | 14346 | -0.1380 | 0.0287 | 1.54E-04 | ??-?-?  | 6.26E-01 | 10353 | -0.0302 | 0.0313 | 3.34E-01 | --- | 2.70E-01 | 26499 | -0.0727 | 0.0212 | 5.85E-04 | --- | 6.52E-02 |
| rs1522099  | 5 | 113246774 | c | g | 18657 | -0.0955 | 0.0248 | 1.20E-04 | -----   | 7.51E-01 | 10318 | -0.0308 | 0.0313 | 3.25E-01 | --- | 2.28E-01 | 28975 | -0.0705 | 0.0194 | 2.84E-04 | --- | 1.05E-02 |
| rs1046353  | 5 | 113291236 | c | g | 14597 | -0.1033 | 0.0284 | 2.77E-04 | ??-?-?  | 8.09E-01 | 10306 | -0.0343 | 0.0291 | 6.45E-01 | --- | 2.12E-01 | 24903 | -0.0627 | 0.0209 | 2.76E-03 | --- | 3.43E-02 |
| 99         |   |           |   |   |       |         |        |          |         |          |       |         |        |          |     |          |       |         |        |          |     |          |
| rs1207762  | 5 | 12146462  |   |   | 18674 | -0.0866 | 0.0247 | 4.65E-04 | -----   | 1.00E-01 | 10243 | -0.0741 | 0.0307 | 1.56E-02 | --- | 3.68E-02 | 29017 | -0.0817 | 0.0192 | 2.19E-05 | --- | 7.51E-01 |
| rs13161508 | 5 | 12158355  | a | c | 18730 | 0.1487  | 0.0415 | 3.40E-04 | +++++   | 6.96E-01 | 10359 | 0.0351  | 0.0698 | 6.15E-01 | ++  | 8.89E-01 | 29089 | 0.119   | 0.0357 | 8.47E-04 | ++  | 1.62E-01 |
| rs1421877  | 5 | 121590134 | t | c | 18671 | -0.1488 | 0.0417 | 3.56E-04 | -----   | 9.99E-01 | 10312 | -0.0474 | 0.0713 | 5.06E-01 | ++  | 9.50E-01 | 28983 | -0.123  | 0.036  | 6.36E-04 | ++  | 2.20E-01 |
| rs1421878  | 5 | 121597424 | a | g | 18655 | -0.1481 | 0.0418 | 4.02E-04 | -----   | 9.99E-01 | 10309 | -0.0476 | 0.0713 | 5.05E-01 | ++  | 9.51E-01 | 28964 | -0.1224 | 0.0361 | 6.88E-04 | ++  | 2.24E-01 |
| rs1421879  | 5 | 121597568 | c | g | 18660 | -0.1485 | 0.0418 | 3.83E-04 | -----   | 9.99E-01 | 10309 | -0.0515 | 0.0713 | 4.70E-01 | ++  | 9.72E-01 | 28969 | -0.1237 | 0.0361 | 6.03E-04 | ++  | 2.41E-01 |
| rs1363163  | 5 | 121600149 | t | c | 18647 | 0.1494  | 0.0418 | 3.45E-04 | +++++   | 9.99E-01 | 10304 | 0.0459  | 0.0713 | 5.20E-01 | ++  | 9.35E-01 | 28951 | 0.1229  | 0.0361 | 6.52E-04 | ++  | 2.11E-01 |
| rs6881951  | 5 | 121620497 | a | g | 18628 | -0.1376 | 0.0399 | 5.68E-04 | -----   | 8.62E-01 | 9960  | -0.0215 | 0.0637 | 7.36E-01 | ?   | 9.57E-01 | 28588 | -0.1049 | 0.0338 | 1.92E-03 | ?   | 1.22E-01 |
| rs20470110 | 5 | 121620597 | a | g | 18727 | -0.1576 | 0.0394 | 6.23E-05 | -----   | 9.32E-01 | 9967  | -0.033  | 0.0639 | 6.06E-01 | ?   | 8.83E-01 | 28694 | -0.1233 | 0.0335 | 2.37E-04 | ?   | 9.70E-02 |
| rs11241634 | 5 | 121622952 | a | g | 18705 | 0.1374  | 0.0402 | 6.23E-04 | +++++   | 9.26E-01 | 9975  | 0.0325  | 0.0641 | 6.12E-01 | ?   | 8.63E-01 | 28680 | 0.1078  | 0.0341 | 1.55E-03 | ?   | 1.66E-01 |
| rs10052044 | 5 | 121622991 | c | g | 16748 | -0.1121 | 0.0449 | 6.53E-01 | -----   | 9.27E-01 | 9975  | -0.0324 | 0.0644 | 6.15E-01 | ?   | 8.63E-01 | 28723 | -0.0928 | 0.0368 | 1.18E-02 | ?   | 2.53E-01 |
| rs2050948  | 5 | 121623317 | c | g | 18782 | 0.1415  | 0.0398 | 3.78E-04 | +++++   | 9.98E-01 | 9975  | 0.0324  | 0.0644 | 6.15E-01 | ?   | 8.63E-01 | 28757 | 0.1133  | 0.0339 | 1.03E-03 | ?   | 1.50E-01 |
| rs2139363  | 5 | 121624095 | a | g | 18774 | 0.1456  | 0.0397 | 2.43E-04 | +++++   | 9.98E-01 | 9975  | 0.0393  | 0.0644 | 5.42E-01 | ?   | 7.99E-01 | 28749 | 0.1163  | 0.0338 | 5.77E-04 | ?   | 1.60E-01 |
| rs9327244  | 5 | 121625290 | c | g | 16443 | 0.1521  | 0.0415 | 2.44E-04 | +++++?+ | 9.38E-01 | 9975  | 0.0324  | 0.0644 | 6.15E-01 | ?   | 8.63E-01 | 28618 | 0.117   | 0.0349 | 7.99E-04 | ?   | 1.18E-01 |
| rs10058354 | 5 | 121626139 | c | g | 16993 | -0.1411 | 0.0405 | 4.96E-04 | -----?  | 8.70E-01 | 9975  | -0.0324 | 0.0644 | 6.15E-01 | ?   | 8.63E-01 | 28668 | -0.1103 | 0.0343 | 1.30E-03 | ?   | 1.53E-01 |
| rs731312   | 5 | 121628286 | c | g | 18669 | 0.1478  | 0.0408 | 2.87E-04 | +++++   | 9.98E-01 | 9974  | 0.0398  | 0.0646 | 5.38E-01 | ?   | 7.32E-01 | 28643 | 0.117   | 0.0345 | 6.94E-04 | ?   | 1.58E-01 |
| rs11241636 | 5 | 121629357 | c | g | 14764 | 0.1526  | 0.0443 | 5.71E-04 | ??+?+?  | 7.61E-01 | 9956  | 0.0505  | 0.065  | 4.37E-01 | ?   | 8.96E-01 | 24720 | 0.202   | 0.0366 | 1.02E-03 | ?   | 1.94E-01 |
| rs13328228 | 5 | 121641599 | a | g | 16466 | -0.1436 | 0.0385 | 1.94E-04 | -----?  | 2.69E-01 | 9962  | 0.0323  | 0.0566 | 5.69E-01 | ?   | 3.30E-01 | 26428 | -0.088  | 0.0318 | 5.73E-03 | ?   | 1.02E-02 |
| rs11241637 | 5 | 121642763 | a | t | 18769 | -0.1312 | 0.0374 | 4.45E-04 | -----   | 1.29E-01 | 9956  | 0.0312  | 0.0569 | 5.84E-01 | ?   | 4.24E-01 | 28725 | -0.0822 | 0.0313 | 8.53E-03 | ?   | 1.71E-02 |
| rs11241638 | 5 | 121643310 | t | c | 16421 | 0.1419  | 0.0389 | 2.66E-04 | +++++?+ | 2.07E-01 | 9899  | -0.0261 | 0.0581 | 6.53E-01 | ?   | 5.22E-01 | 26320 | -0.0899 | 0.0323 | 5.42E-03 | ?   | 1.63E-02 |
| rs11733978 | 5 | 121643977 | a | g | 18807 | 0.1051  | 0.0304 | 5.35E-01 | -----   | 4.95E-01 | 10355 | 0.0452  | 0.0557 | 2.05E-01 | ++  | 3.44E-01 | 29169 | 0.0799  | 0.0231 | 5.54E-04 | ++  | 2.01E-01 |
| rs1716003  | 5 | 125439556 | a | g | 18814 | 0.1045  | 0.0303 | 5.68E-04 | +++++   | 8.28E-01 | 10355 | 0.0452  | 0.0557 | 2.05E-01 | ++  | 3.44E-01 | 29169 | 0.0797  | 0.0231 | 5.63E-04 | ++  | 2.05E-01 |
| rs10070545 | 5 | 125469352 | t | c | 18716 | 0.1109  | 0.0304 | 6.1E-04  | +++++   | 8.51E-01 | 10337 | 0.0452  | 0.0557 | 2.05E-01 | ++  | 3.51E-01 | 29163 | 0.0833  | 0.0231 | 3.20E-04 | ++  | 1.61E-01 |
| rs6956669  | 5 | 125478687 | c | g | 18699 | 0.1116  | 0.0303 | 2.33E-04 | +++++   | 8.26E-01 | 10352 | 0.0438  | 0.0556 | 2.18E-01 | ++  | 3.40E-01 | 29051 | 0.0831  | 0.0231 | 3.16E-04 | ++  | 1.47E-01 |
| 101        |   |           |   |   |       |         |        |          |         |          |       |         |        |          |     |          |       |         |        |          |     |          |
| rs880770   | 5 | 149135028 | a | g | 18816 | 0.1231  | 0.0274 | 3.71E-06 | +++++?+ | 8.91E-01 | 10362 | 0.0142  | 0.0333 | 6.70E-01 | ++  | 9.78E-01 | 29178 | 0.0677  | 0.0212 | 1.38E-03 | ++  | 1.45E-03 |
| rs1469042  | 5 | 149137507 | a | g | 18613 | -0.0775 | 0.0276 | 4.98E-03 | -----   | 8.46E-03 | 10298 | 0.0152  | 0.0334 | 6.49E-01 | ++  | 9.82E-01 | 28911 | -0.0399 | 0.0213 | 6.08E-02 | ++  | 3.24E-02 |
| rs1713988  | 5 | 149137819 | a | t | 14173 | 0.0581  | 0.0325 | 7.36E-02 | ??+?+?  | 2.93E-02 | 10235 | -0.0107 | 0.0336 | 7.51E-01 | ++  | 9.64E-01 | 24408 | -0.0248 | 0.0234 | 2.88E-04 | ++  | 1.41E-01 |
| rs6829420  | 5 | 149138019 | a | g | 18562 | -0.0786 | 0.0276 | 4.38E-03 | -----   | 1.01E-02 | 10296 | 0.0162  | 0.0334 | 6.28E-01 | ++  | 9.81E-01 | 28858 | -0.0401 | 0.0213 | 5.93E-02 | ++  | 2.87E-02 |
| rs405377   | 5 | 149143607 | a | g | 18815 | -0.0776 | 0.0272 | 4.37E-03 | -----   | 1.22E-02 | 10344 | 0.0164  | 0.0332 | 6.21E-01 | ++  | 9.46E-01 | 29159 | -0.0398 | 0.021  | 5.83E-02 | ++  | 2.85E-02 |
| rs405378   | 5 | 149144856 | a | g | 18725 | -0.0808 | 0.0274 | 3.14E-03 | -----   | 1.31E-02 | 10357 | -0.0215 | 0.0333 | 5.29E-01 | ++  | 9.24E-01 | 29055 | -0.0395 | 0.0212 | 6.19E-02 | ++  | 1.77E-02 |
| 102        |   |           |   |   |       |         |        |          |         |          |       |         |        |          |     |          |       |         |        |          |     |          |
| rs131680   | 5 | 159207919 | a | g | 18647 | 0.038   | 0.0254 | 4.85E-01 | ??+?+?  | 2.70E-01 | 10287 | 0.0142  | 0.0346 | 6.31E-01 | ?   | 1.00E-01 | 14334 |         |        |          |     |          |

|            |   |          |        |   |   |       |         |        |          |          |          |       |         |        |          |     |          |       |         |        |          |    |          |
|------------|---|----------|--------|---|---|-------|---------|--------|----------|----------|----------|-------|---------|--------|----------|-----|----------|-------|---------|--------|----------|----|----------|
| rs9295474  | 6 | 20760696 | CDKAL1 | c | g | 18735 | -0.1735 | 0.0231 | 5.27E-14 | -----    | 1.92E-01 | 10357 | -0.1402 | 0.0285 | 8.59E-07 | --- | 8.69E-01 | 29092 | -0.1603 | 0.0179 | 4.17E-19 | -- | 3.64E-01 |
| rs9295475  | 6 | 20760744 | CDKAL1 | a | g | 18787 | -0.1696 | 0.0231 | 2.32E-13 | -----    | 4.98E-01 | 10356 | -0.1516 | 0.0286 | 1.15E-07 | --- | 9.36E-01 | 29143 | -0.1625 | 0.018  | 1.54E-19 | -- | 6.24E-01 |
| rs2328545  | 6 | 20761529 | CDKAL1 | c | g | 18776 | 0.1712  | 0.0232 | 1.48E-13 | +++++    | 4.85E-01 | 10357 | 0.1525  | 0.0286 | 9.61E-08 | +++ | 9.45E-01 | 29133 | 0.1638  | 0.018  | 9.90E-20 | -- | 6.12E-01 |
| rs9358355  | 6 | 20762876 | CDKAL1 | t | c | 18763 | -0.1713 | 0.0232 | 1.40E-13 | -----    | 4.91E-01 | 10356 | -0.1525 | 0.0286 | 9.67E-08 | --- | 9.44E-01 | 29119 | -0.1638 | 0.018  | 9.60E-20 | -- | 6.10E-01 |
| rs9362166  | 6 | 20763160 | CDKAL1 | a | g | 18760 | -0.1706 | 0.0232 | 1.85E-13 | -----    | 4.52E-01 | 10356 | -0.1525 | 0.0286 | 9.67E-08 | --- | 9.44E-01 | 29116 | -0.1634 | 0.018  | 1.19E-19 | -- | 6.23E-01 |
| rs4712522  | 6 | 20764779 | CDKAL1 | a | g | 18813 | -0.1761 | 0.023  | 2.14E-14 | -----    | 1.42E-01 | 10355 | -0.1413 | 0.0285 | 6.88E-07 | --- | 8.80E-01 | 29171 | -0.1624 | 0.0179 | 1.17E-19 | -- | 8.42E-01 |
| rs4712523  | 6 | 20765543 | CDKAL1 | a | g | 18787 | -0.1743 | 0.023  | 3.47E-14 | -----    | 1.31E-01 | 10356 | -0.1424 | 0.0285 | 5.79E-07 | --- | 8.41E-01 | 29143 | -0.1617 | 0.0179 | 1.64E-19 | -- | 8.34E-01 |
| rs4710940  | 6 | 20765991 | CDKAL1 | a | g | 18813 | -0.1771 | 0.023  | 1.44E-14 | -----    | 1.57E-01 | 10358 | -0.1413 | 0.0285 | 6.88E-07 | --- | 8.80E-01 | 29171 | -0.1617 | 0.0179 | 8.57E-20 | -- | 8.28E-01 |
| rs9606327  | 6 | 20767438 | CDKAL1 | a | g | 18814 | 0.1761  | 0.023  | 2.04E-14 | +++++    | 1.54E-01 | 10353 | 0.1415  | 0.0284 | 6.53E-07 | +++ | 8.71E-01 | 29167 | 0.1624  | 0.0179 | 1.03E-19 | ++ | 3.44E-01 |
| rs9456367  | 6 | 20767566 | CDKAL1 | a | t | 18813 | 0.1761  | 0.023  | 2.05E-14 | +++++    | 1.49E-01 | 10363 | 0.1423  | 0.0284 | 5.99E-07 | +++ | 8.54E-01 | 29176 | 0.1627  | 0.0179 | 8.75E-20 | ++ | 3.55E-01 |
| rs9456368  | 6 | 20767785 | CDKAL1 | t | c | 18696 | -0.1719 | 0.0231 | 1.10E-13 | -----    | 1.50E-01 | 10363 | -0.1423 | 0.0284 | 5.99E-07 | --- | 8.54E-01 | 29059 | -0.1601 | 0.0179 | 4.08E-19 | -- | 4.19E-01 |
| rs9456369  | 6 | 20768344 | CDKAL1 | t | c | 18813 | -0.122  | 0.0231 | 1.22E-07 | -----    | 6.59E-07 | 10327 | -0.1342 | 0.0286 | 2.60E-06 | --- | 9.65E-01 | 29140 | -0.1268 | 0.018  | 1.70E-19 | -- | 7.40E-01 |
| rs10946398 | 6 | 20769013 | CDKAL1 | a | c | 18810 | -0.1757 | 0.023  | 2.42E-14 | -----    | 1.54E-01 | 10343 | -0.1429 | 0.0285 | 5.33E-07 | --- | 8.39E-01 | 29153 | -0.1628 | 0.0179 | 9.58E-20 | -- | 3.71E-01 |
| rs1774594  | 6 | 20769122 | CDKAL1 | a | t | 18813 | 0.1761  | 0.023  | 2.08E-14 | +++++    | 1.45E-01 | 10363 | 0.1423  | 0.0284 | 5.99E-07 | +++ | 8.54E-01 | 29176 | 0.1627  | 0.0179 | 8.75E-20 | ++ | 3.55E-01 |
| rs1794840  | 6 | 20769222 | CDKAL1 | c | g | 18732 | 0.1786  | 0.0231 | 9.63E-15 | +++++    | 1.09E-07 | 10457 | 0.1455  | 0.0285 | 3.29E-07 | +++ | 7.64E-01 | 29079 | 0.1655  | 0.0219 | 2.94E-20 | ++ | 3.97E-01 |
| rs9460544  | 6 | 20769508 | CDKAL1 | t | c | 18814 | 0.176   | 0.023  | 2.14E-14 | +++++    | 1.45E-01 | 10363 | 0.1423  | 0.0284 | 5.99E-07 | --- | 8.54E-01 | 29177 | 0.1627  | 0.0179 | 9.03E-20 | ++ | 3.57E-01 |
| rs9460545  | 6 | 20769529 | CDKAL1 | t | c | 18814 | -0.176  | 0.023  | 2.12E-14 | +++++    | 1.44E-01 | 10363 | -0.1423 | 0.0284 | 5.99E-07 | --- | 8.54E-01 | 29177 | -0.1627 | 0.0179 | 9.03E-20 | ++ | 3.57E-01 |
| rs979614   | 6 | 20770102 | CDKAL1 | a | g | 14832 | 0.131   | 0.0257 | 3.38E-07 | ++2++++  | 2.34E-01 | 10361 | 0.1386  | 0.0297 | 3.05E-06 | +++ | 6.16E-01 | 25193 | 0.1343  | 0.0194 | 4.91E-12 | ++ | 8.47E-01 |
| rs4712525  | 6 | 20770945 | CDKAL1 | t | c | 18814 | 0.1741  | 0.023  | 4.03E-14 | +++++    | 1.73E-01 | 10363 | 0.1423  | 0.0284 | 5.99E-07 | +++ | 8.54E-01 | 29177 | 0.1615  | 0.0179 | 1.63E-19 | ++ | 3.84E-01 |
| rs4712526  | 6 | 20771014 | CDKAL1 | a | t | 18814 | 0.1742  | 0.023  | 3.94E-14 | +++++    | 1.73E-01 | 10363 | 0.1423  | 0.0284 | 5.99E-07 | +++ | 8.54E-01 | 29177 | 0.1616  | 0.0179 | 1.58E-19 | ++ | 3.83E-01 |
| rs9460546  | 6 | 20771611 | CDKAL1 | t | g | 18787 | -0.1767 | 0.0231 | 2.10E-14 | -----    | 1.62E-01 | 10274 | -0.1461 | 0.0287 | 3.46E-07 | --- | 7.37E-01 | 29061 | -0.1647 | 0.018  | 5.65E-20 | -- | 4.06E-01 |
| rs742642   | 6 | 20773060 | CDKAL1 | a | g | 18814 | 0.1708  | 0.0231 | 1.56E-13 | +++++    | 3.37E-01 | 10362 | 0.1539  | 0.0286 | 7.19E-08 | +++ | 9.24E-01 | 29176 | 0.1641  | 0.018  | 6.65E-20 | ++ | 4.64E-01 |
| rs17748382 | 6 | 20773528 | CDKAL1 | a | g | 18814 | 0.1738  | 0.023  | 4.60E-14 | +++++    | 1.83E-01 | 10363 | 0.1409  | 0.0284 | 7.22E-07 | +++ | 8.38E-01 | 29177 | 0.1608  | 0.0179 | 2.37E-19 | ++ | 3.68E-01 |
| rs1772603  | 6 | 20773925 | CDKAL1 | c | g | 18780 | -0.191  | 0.0245 | 6.26E-15 | -?-----  | 4.20E-01 | 10363 | -0.1416 | 0.0284 | 6.95E-07 | --- | 8.46E-01 | 27143 | -0.1659 | 0.0186 | 5.20E-20 | -- | 1.88E-01 |
| rs9358357  | 6 | 20774003 | CDKAL1 | a | g | 18814 | 0.1754  | 0.023  | 2.69E-14 | +++++    | 2.17E-01 | 10338 | 0.1416  | 0.0284 | 6.35E-07 | +++ | 8.46E-01 | 29007 | 0.1467  | 0.0178 | 1.60E-16 | ++ | 6.97E-01 |
| rs1772906  | 6 | 20774034 | CDKAL1 | t | g | 16479 | 0.1617  | 0.0248 | 3.76E-11 | +++++2+  | 8.61E-01 | 10363 | 0.1416  | 0.0284 | 6.35E-07 | +++ | 8.46E-01 | 26842 | 0.1517  | 0.0267 | 1.60E-16 | ++ | 5.94E-01 |
| rs9358356  | 6 | 20775361 | CDKAL1 | t | c | 18737 | -0.1766 | 0.0232 | 2.41E-14 | -----    | 2.26E-01 | 10271 | -0.1446 | 0.0286 | 4.17E-07 | --- | 7.88E-01 | 29008 | -0.1639 | 0.018  | 9.31E-20 | -- | 3.85E-01 |
| rs9350270  | 6 | 20775718 | CDKAL1 | a | g | 14831 | -0.0996 | 0.0254 | 8.99E-05 | -?+----- | 5.41E-01 | 10197 | -0.131  | 0.0286 | 4.55E-06 | --- | 7.52E-01 | 25028 | -0.1134 | 0.019  | 2.32E-20 | -- | 4.12E-01 |
| rs9362129  | 6 | 20782670 | CDKAL1 | t | c | 14701 | 0.1599  | 0.0261 | 8.44E-10 | +++++2+  | 4.38E-01 | 10222 | 0.1774  | 0.0288 | 6.82E-10 | +++ | 7.29E-01 | 24222 | 0.1678  | 0.0193 | 4.10E-18 | ++ | 6.53E-01 |
| rs1569699  | 6 | 20787289 | CDKAL1 | t | g | 18636 | -0.1416 | 0.0228 | 5.41E-10 | -----    | 7.73E-02 | 10360 | -0.1496 | 0.0283 | 1.23E-07 | --- | 6.36E-01 | 28996 | -0.1447 | 0.0178 | 3.56E-16 | -- | 8.26E-01 |
| rs1756992  | 6 | 20787688 | CDKAL1 | a | g | 18649 | -0.1116 | 0.0228 | 1.01E-06 | -----    | 2.68E-04 | 10340 | -0.1545 | 0.0284 | 5.42E-08 | --- | 4.72E-01 | 28989 | -0.1284 | 0.0178 | 5.10E-13 | -- | 2.39E-01 |
| rs9350271  | 6 | 20791143 | CDKAL1 | a | g | 12447 | 0.1565  | 0.0286 | 4.32E-08 | +++++2+  | 6.51E-01 | 10349 | 0.177   | 0.0286 | 8.58E-10 | +++ | 7.53E-01 | 22796 | 0.1667  | 0.0202 | 1.65E-16 | ++ | 6.12E-01 |
| rs9356744  | 6 | 20793465 | CDKAL1 | t | c | 14870 | -0.17   | 0.0259 | 5.56E-11 | -?-----  | 4.07E-01 | 10350 | -0.1765 | 0.0286 | 6.42E-10 | --- | 7.33E-01 | 25130 | -0.1729 | 0.0192 | 2.10E-19 | -- | 8.66E-01 |
| rs1776670  | 6 | 20794552 | CDKAL1 | a | c | 14807 | 0.167   | 0.0259 | 1.20E-10 | +++++2+  | 6.72E-01 | 10350 | 0.1765  | 0.0286 | 6.42E-10 | +++ | 7.33E-01 | 25157 | 0.1733  | 0.0192 | 4.59E-19 | ++ | 8.06E-01 |
| rs9358322  | 6 | 20794975 | CDKAL1 | a | g | 14806 | 0.0892  | 0.0259 | 5.78E-04 | +++++    | 2.54E-06 | 10346 | 0.1276  | 0.0286 | 1.56E-09 | --- | 8.45E-01 | 29007 | 0.1362  | 0.0192 | 4.01E-11 | ++ | 8.51E-01 |
| rs10440833 | 6 | 20796100 | CDKAL1 | t | c | 14713 | 0.1702  | 0.0263 | 9.35E-11 | +++++2+  | 4.49E-01 | 10216 | 0.1775  | 0.0288 | 7.16E-10 | +++ | 7.91E-01 | 24929 | 0.1735  | 0.0194 | 4.08E-19 | ++ | 8.52E-01 |
| rs2206734  | 6 | 20802863 | CDKAL1 | a | t | 14832 | 0.1666  | 0.026  | 1.52E-10 | +++++2+  | 4.77E-01 | 10336 | 0.1802  | 0.0286 | 3.16E-10 | +++ | 6.98E-01 | 25168 | 0.1728  | 0.0192 | 2.72E-19 | ++ | 7.25E-01 |
| rs11753081 | 6 | 20813569 | CDKAL1 | t | g | 18655 | -0.1367 | 0.0228 | 1.93E-09 | -----    | 1.17E-01 | 10352 | -0.1565 | 0.0284 | 3.38E-08 | --- | 6.71E-01 | 29007 | -0.1445 | 0.0178 | 4.47E-16 | -- | 5.87E-01 |
| rs1040558  | 6 | 20821685 | CDKAL1 | a | g | 18718 | -0.107  | 0.0227 | 2.47E-06 | -----    | 5.16E-04 | 10359 | -0.1564 | 0.0283 | 3.44E-08 | --- | 6.74E-01 | 29077 | -0.1263 | 0.0177 | 9.69E-13 | -- | 1.73E-01 |
| rs9295478  | 6 | 20824232 | CDKAL1 | a | g | 18753 | 0.1407  | 0.0227 | 5.69E-10 | +++++    | 1.49E-01 | 10269 | 0.1639  | 0.0284 | 8.09E-09 | +++ | 4.26E-01 | 29022 | 0.1497  | 0.0177 | 3.04E-17 | ++ | 5.23E-01 |
| rs2328548  | 6 | 20824937 | CDKAL1 | a | g | 18772 | 0.1394  | 0.0227 | 8.35E-10 | +++++    | 1.24E-01 | 10360 | 0.1561  | 0.0283 | 3.66E-08 | +++ | 6.80E-01 | 29132 | 0.1459  | 0.0177 | 1.70E-16 | ++ | 6.45E-01 |
| rs9359959  | 6 | 20825074 | CDKAL1 | a | g | 18777 | -0.1398 | 0.0227 | 7.36E-10 | -----    | 1.30E-01 | 10360 | -0.1561 | 0.0283 | 3.66E-08 | --- | 6.80E-01 | 29137 | -0.1462 | 0.0177 | 1.51E-16 | -- | 6.53E-01 |
| rs9456781  | 6 | 20825234 | CDKAL1 | t | c | 18578 | -0.1138 | 0.0228 | 6.02E-07 | -----    | 1.71E-04 | 10347 | -0.1523 | 0.0283 | 7.89E-08 | --- | 7.68E-01 | 28925 | -0.1289 | 0.0178 | 4.19E-13 | -- | 2.91E-01 |
| rs10946003 | 6 | 20825383 | CDKAL1 | a | g | 18765 | -0.1379 | 0.0228 | 1.37E-09 | -----    | 6.72E-02 | 10356 | -0.1571 | 0.0283 | 2.99E-08 | --- | 7.25E-01 | 29121 | -0.1455 | 0.0178 | 2.56E-16 | -- | 5.97E-01 |
| rs9358357  | 6 | 20827003 | CDKAL1 | a | g | 18662 | -0.1411 | 0.0228 | 5.59E-10 | -----    | 1.21E-01 | 10338 | -0.1553 | 0.0284 | 4.33E-08 | --- | 7.74E-01 | 29000 | -0.1467 | 0.0178 | 1.60E-16 | -- | 6.97E-01 |
| rs9362224  | 6 | 20827211 | CDKAL1 | a | t | 18661 | 0.1412  | 0.0228 | 5.51E-10 | +++++    | 9.22E-01 | 10338 | 0.1553  | 0.0284 | 4.33E-08 | +++ | 7.74E-01 | 28999 | 0.1467  | 0.0178 | 1.55E-16 | ++ | 6.99E-01 |
| rs9358358  | 6 | 20827372 | CDKAL1 | a | g | 18615 | -0.1398 | 0.0228 | 8.37E-10 | -----    | 9.90E-02 | 10338 | -0.1553 | 0.0284 | 4.33E-08 | --- | 7.74E-01 | 28953 | -0.1459 | 0.0178 | 2.31E-16 | -- | 6.70E-01 |
| rs9460550  | 6 | 20827540 | CDKAL1 | a | g | 18662 | 0.1404  | 0.0228 | 6.97E-10 | +++++    | 1.10E-01 | 10338 | 0.1553  | 0.0284 | 4.33E-08 | +++ | 7.74E-01 | 29000 | 0.1462  | 0.0178 | 1.95E-16 | ++ | 6.83E-01 |
| rs9356746  | 6 | 20828258 | CDKAL1 | t | c | 18626 | -0.14   | 0.0228 | 7.70E-10 | -----    | 9.59E-02 | 10338 | -0.1553 | 0.0284 | 4.33E-08 | --- | 7.74E-01 | 28964 | -0.1446 | 0.0178 | 2.18E-16 | -- | 6.74E-01 |
| rs9368226  | 6 | 20831036 | CDKAL1 | t | c | 18570 | -0.1468 | 0.0229 | 1.34E-10 | -----    | 2.60E-01 | 9897  | -0.1612 | 0.029  | 2.77E-08 | --- | 4.06E-01 | 28467 | -0.1523 | 0.018  | 2.33E-17 | -- | 6.97     |

|     |            |   |          |        |   |   |       |         |        |          |         |          |       |         |        |          |     |          |       |         |        |          |     |          |
|-----|------------|---|----------|--------|---|---|-------|---------|--------|----------|---------|----------|-------|---------|--------|----------|-----|----------|-------|---------|--------|----------|-----|----------|
|     | rs7488392  | 6 | 38226733 | ZFAND3 | a | g | 14803 | -0.106  | 0.0275 | 1.17E-04 | ---?+.. | 4.04E-01 | 13002 | -0.0822 | 0.0351 | 1.92E-02 | --- | 5.83E-01 | 25105 | -0.0969 | 0.0216 | 7.52E-06 | --- | 5.94E-01 |
|     | rs786188   | 6 | 38228638 | ZFAND3 | t | c | 14811 | 0.1043  | 0.0275 | 1.51E-04 | +++?+.. | 3.02E-01 | 13002 | 0.0822  | 0.0351 | 1.92E-02 | +++ | 5.83E-01 | 25113 | 0.0959  | 0.0216 | 9.43E-06 | +++ | 6.20E-01 |
|     | rs3800364  | 6 | 38229189 | ZFAND3 | a | g | 14811 | -0.1036 | 0.0275 | 1.68E-04 | ---?+.. | 3.02E-01 | 13003 | -0.0804 | 0.0351 | 2.18E-02 | --- | 5.72E-01 | 25114 | -0.0948 | 0.0216 | 1.20E-05 | --- | 6.03E-01 |
|     | rs2395692  | 6 | 38232057 |        | a | g | 14806 | -0.1027 | 0.0275 | 1.91E-04 | ---?+.. | 3.05E-01 | 13006 | -0.0808 | 0.0351 | 2.13E-02 | --- | 5.78E-01 | 25112 | -0.0944 | 0.0216 | 1.30E-05 | --- | 6.23E-01 |
|     | rs2395693  | 6 | 38232058 |        | t | c | 14798 | 0.1028  | 0.0275 | 1.89E-04 | +++?+.. | 3.02E-01 | 13007 | 0.0785  | 0.0351 | 2.51E-02 | +++ | 5.68E-01 | 25105 | 0.0931  | 0.0216 | 1.53E-05 | +++ | 5.85E-01 |
| 118 | rs11756091 | 6 | 39390784 | KCNK16 | t | g | 13045 | 0.1171  | 0.0276 | 5.54E-06 | +++?+.. | 2.03E-01 | 7874  | 0.0695  | 0.0338 | 3.99E-02 | +++ | 8.57E-01 | 20919 | 0.0991  | 0.0208 | 1.78E-05 | +++ | 2.66E-01 |
|     | rs1246262  | 6 | 39391771 | KCNK16 | a | g | 18764 | 0.0547  | 0.0229 | 1.70E-02 | +++++.. | 2.41E-03 | 7869  | 0.0688  | 0.0339 | 4.22E-02 | +++ | 7.84E-01 | 26633 | 0.0591  | 0.019  | 1.84E-03 | +++ | 7.30E-01 |
|     | rs1535500  | 6 | 39392028 | KCNK16 | t | g | 17010 | 0.1063  | 0.0234 | 3.54E-06 | +++++.. | 3.54E-03 | 7875  | 0.072   | 0.0338 | 3.33E-02 | +++ | 9.07E-01 | 24885 | 0.0952  | 0.0192 | 7.52E-07 | +++ | 4.04E-01 |
|     | rs3734618  | 6 | 39392162 | KCNK16 | a | g | 14829 | -0.1165 | 0.0255 | 5.08E-06 | ---?+.. | 4.30E-01 | 7873  | -0.0717 | 0.0338 | 3.41E-02 | --- | 9.72E-01 | 22702 | -0.1003 | 0.0204 | 8.45E-07 | --- | 2.90E-01 |
| 119 | rs782817   | 6 | 39409896 |        | t | c | 18782 | -0.0767 | 0.0238 | 1.27E-03 | -----   | 7.35E-01 | 10356 | -0.0119 | 0.0297 | 6.89E-01 | --- | 6.78E-01 | 29138 | -0.0514 | 0.0186 | 9.56E-07 | --- | 8.86E-02 |
|     | rs7740446  | 6 | 39410410 | KIF6   | t | c | 18674 | -0.0832 | 0.0238 | 4.85E-04 | -----   | 7.51E-01 | 10337 | -0.0077 | 0.0296 | 7.94E-01 | --- | 3.45E-01 | 29011 | -0.0536 | 0.0185 | 3.89E-03 | --- | 4.68E-02 |
|     | rs774204   | 6 | 39410479 | KIF6   | t | c | 18766 | -0.0786 | 0.0238 | 9.74E-04 | -----   | 7.59E-01 | 10355 | -0.0168 | 0.0295 | 5.68E-01 | --- | 6.18E-01 | 29121 | -0.0542 | 0.0185 | 3.41E-03 | --- | 1.03E-01 |
|     | rs7754225  | 6 | 39410701 | KIF6   | t | c | 18663 | 0.0806  | 0.0239 | 7.34E-04 | +++++.. | 7.52E-01 | 10353 | 0.0081  | 0.0297 | 7.85E-01 | +++ | 8.19E-01 | 29016 | 0.0521  | 0.0186 | 5.14E-03 | +++ | 5.72E-02 |
|     | rs1887716  | 6 | 39410810 | KIF6   | t | c | 18638 | 0.0621  | 0.0238 | 9.12E-04 | +++++.. | 3.02E-01 | 10352 | 0.0184  | 0.0295 | 5.31E-01 | +++ | 7.23E-01 | 28990 | 0.0449  | 0.0185 | 1.54E-03 | +++ | 2.49E-01 |
|     | rs9462321  | 6 | 39421574 | KIF6   | a | g | 18652 | 0.0769  | 0.0237 | 1.20E-03 | +++++.. | 6.90E-01 | 10360 | -0.0088 | 0.0295 | 7.66E-01 | --- | 2.83E-01 | 28955 | 0.0433  | 0.0185 | 1.92E-02 | --- | 2.35E-02 |
|     | rs694582   | 6 | 39411733 | KIF6   | a | g | 18646 | 0.0799  | 0.0239 | 8.13E-04 | +++++.. | 7.74E-01 | 10201 | -0.0095 | 0.0299 | 7.51E-01 | --- | 1.76E-01 | 28947 | 0.045   | 0.0187 | 1.58E-02 | --- | 1.95E-02 |
| 120 | rs10456556 | 6 | 46052414 | C11C5  | a | g | 18712 | 0.0771  | 0.0256 | 2.56E-03 | +++++.. | 4.20E-02 | 10347 | 0.0425  | 0.0324 | 1.90E-01 | +++ | 3.60E-01 | 29059 | 0.0638  | 0.0201 | 1.49E-03 | +++ | 4.02E-01 |
|     | rs2039716  | 6 | 46053234 | C11C5  | t | g | 16774 | 0.0513  | 0.0273 | 6.06E-02 | +?+..   | 1.93E-02 | 10351 | 0.0434  | 0.0324 | 1.80E-01 | +++ | 3.11E-01 | 27125 | 0.0408  | 0.0209 | 2.14E-02 | +++ | 8.52E-01 |
|     | rs6930840  | 6 | 46059789 | C11C5  | a | g | 18644 | 0.0683  | 0.0257 | 7.98E-03 | +?+..   | 9.91E-03 | 10258 | 0.046   | 0.0326 | 1.58E-01 | +++ | 1.89E-01 | 28902 | 0.0598  | 0.0202 | 3.07E-03 | +++ | 5.91E-01 |
|     | rs1338467  | 6 | 46061231 | C11C5  | t | g | 16486 | -0.0435 | 0.0275 | 1.15E-01 | -?+..   | 4.10E-03 | 10240 | -0.0405 | 0.0323 | 2.10E-01 | --- | 1.75E-01 | 26726 | -0.0422 | 0.0209 | 4.37E-02 | --- | 9.44E-01 |
|     | rs3776005  | 6 | 46065579 | C11C5  | a | g | 18812 | 0.0666  | 0.0256 | 9.44E-03 | +++++.. | 5.92E-03 | 10363 | 0.0241  | 0.0321 | 4.53E-01 | --- | 1.70E-01 | 29175 | 0.0501  | 0.02   | 1.24E-02 | --- | 3.01E-01 |
|     | rs3776006  | 6 | 46065863 | C11C5  | a | g | 18805 | 0.0678  | 0.0256 | 8.13E-03 | +++++.. | 5.09E-03 | 10363 | 0.0261  | 0.032  | 4.14E-01 | --- | 1.79E-01 | 29168 | 0.0514  | 0.02   | 9.95E-03 | --- | 3.09E-01 |
|     | rs1338469  | 6 | 46066913 | C11C5  | a | g | 18749 | 0.069   | 0.0256 | 7.13E-03 | +++++.. | 3.94E-03 | 10361 | 0.0265  | 0.032  | 4.08E-01 | +++ | 1.87E-01 | 29110 | 0.0524  | 0.02   | 8.74E-03 | +++ | 3.00E-01 |
|     | rs1535109  | 6 | 46068107 | C11C5  | a | g | 16220 | -0.0574 | 0.0277 | 3.85E-02 | ---?+.. | 6.35E-03 | 10337 | -0.0273 | 0.032  | 3.94E-01 | --- | 2.03E-01 | 26557 | -0.0495 | 0.0209 | 3.36E-02 | --- | 4.77E-01 |
|     | rs10480486 | 6 | 46070430 | C11C5  | a | g | 14766 | 0.1019  | 0.0285 | 2.93E-04 | +++?+.. | 3.70E-01 | 10311 | 0.0271  | 0.0495 | 3.97E-01 | +++ | 1.90E-01 | 25143 | 0.0709  | 0.0204 | 1.29E-02 | +++ | 6.55E-02 |
|     | rs4077761  | 6 | 46073476 | C11C5  | t | g | 18748 | 0.0711  | 0.0256 | 5.46E-03 | +++++.. | 3.10E-03 | 10361 | 0.0265  | 0.0319 | 4.07E-01 | +++ | 2.01E-01 | 29109 | 0.0536  | 0.02   | 7.23E-03 | +++ | 2.76E-01 |
|     | rs1241463  | 6 | 46074782 | C11C5  | t | c | 18760 | -0.07   | 0.0256 | 6.27E-03 | ---?+.. | 2.81E-03 | 10361 | -0.0264 | 0.0319 | 4.08E-01 | --- | 1.86E-01 | 29121 | -0.0529 | 0.02   | 8.04E-03 | --- | 2.86E-01 |
|     | rs1338472  | 6 | 46076739 | C11C5  | a | g | 18816 | 0.0696  | 0.0256 | 6.53E-03 | +++++.. | 2.98E-03 | 10363 | 0.0261  | 0.032  | 4.15E-01 | +++ | 1.77E-01 | 29179 | 0.0526  | 0.02   | 8.48E-03 | +++ | 2.89E-01 |
|     | rs1338474  | 6 | 46079747 | C11C5  | a | g | 18702 | 0.0708  | 0.0257 | 5.84E-03 | +++++.. | 3.31E-03 | 10352 | 0.0303  | 0.032  | 3.45E-01 | +++ | 1.60E-01 | 29054 | 0.0549  | 0.02   | 6.13E-03 | +++ | 3.24E-01 |
|     | rs3776223  | 6 | 46084355 | C11C5  | a | g | 18797 | 0.066   | 0.0255 | 9.80E-03 | +++++.. | 3.36E-03 | 10347 | 0.0331  | 0.0321 | 3.03E-01 | +++ | 1.40E-01 | 29144 | 0.0533  | 0.02   | 7.63E-03 | +++ | 4.22E-01 |
|     | rs10948271 | 6 | 46086102 | C11C5  | t | c | 10885 | 0.0939  | 0.0234 | 3.80E-03 | +++?+.. | 2.09E-01 | 10339 | 0.0445  | 0.0323 | 1.68E-01 | +++ | 3.93E-02 | 21224 | 0.0691  | 0.0229 | 2.51E-03 | +++ | 2.80E-01 |
|     | rs1555216  | 6 | 46086137 | C11C5  | a | g | 18662 | 0.0653  | 0.0256 | 1.06E-02 | +++++.. | 5.37E-03 | 10346 | 0.0338  | 0.032  | 2.92E-01 | +++ | 1.31E-01 | 29008 | 0.053   | 0.02   | 8.01E-03 | +++ | 4.42E-01 |
|     | rs3776225  | 6 | 46086193 | C11C5  | a | g | 14822 | 0.0988  | 0.0284 | 5.05E-04 | +++?+.. | 6.12E-02 | 10348 | 0.0336  | 0.032  | 2.94E-01 | +++ | 1.36E-01 | 25170 | 0.0701  | 0.0212 | 9.71E-04 | +++ | 1.28E-01 |
|     | rs10400472 | 6 | 46089124 | C11C5  | c | g | 8843  | -0.2281 | 0.029  | 4.70E-01 | ????    | 4.85E-01 | 9962  | -0.418  | 0.025  | 2.88E-01 | ?   | 6.89E-02 | 18805 | -0.622  | 0.025  | 1.47E-01 | ?   | 7.87E-01 |
| 121 | rs6923157  | 6 | 53694474 |        | a | g | 12495 | 0.1271  | 0.032  | 3.78E-04 | +++++.. | 3.40E-01 | 10246 | 0.0688  | 0.0407 | 9.07E-02 | +++ | 1.16E-01 | 26541 | 0.1017  | 0.0268 | 1.50E-04 | +++ | 3.00E-01 |
|     | rs6913301  | 6 | 53694508 |        | t | c | 12459 | -0.1366 | 0.041  | 8.57E-04 | ---?+.. | 9.00E-01 | 10235 | -0.064  | 0.0475 | 1.78E-01 | --- | 1.23E-01 | 26294 | -0.1056 | 0.031  | 6.68E-04 | --- | 2.47E-01 |
| 122 | rs17830060 | 6 | 55355234 | GRAL1  | t | c | 8843  | -0.1198 | 0.0358 | 2.60E-02 | ????    | 2.51E-01 | 7848  | -0.0294 | 0.0604 | 6.26E-01 | ?   | 4.76E-01 | 16691 | -0.0798 | 0.0402 | 4.70E-02 | ?   | 2.64E-01 |
|     | rs783867   | 6 | 55344896 | GRAL1  | t | c | 14832 | 0.1297  | 0.037  | 4.64E-04 | +++?+.. | 2.51E-01 | 7875  | 0.0265  | 0.0609 | 6.63E-01 | +++ | 3.70E-01 | 22707 | 0.1019  | 0.0316 | 1.27E-03 | +++ | 1.48E-01 |
|     | rs16886642 | 6 | 55349782 | GRAL1  | c | g | 14719 | -0.1198 | 0.037  | 1.20E-03 | ---?+.. | 2.40E-01 | 10316 | -0.0257 | 0.0507 | 6.12E-01 | --- | 5.04E-01 | 25035 | -0.0879 | 0.0299 | 3.57E-03 | --- | 1.34E-01 |
|     | rs12663965 | 6 | 55363750 | GRAL1  | t | c | 14827 | -0.1044 | 0.0368 | 4.50E-03 | ---?+.. | 2.61E-01 | 10350 | -0.0257 | 0.0503 | 6.10E-01 | --- | 4.13E-01 | 25177 | -0.0777 | 0.0297 | 9.56E-03 | --- | 2.07E-01 |
|     | rs12662782 | 6 | 55363886 | GRAL1  | a | g | 14830 | 0.051   | 0.0368 | 1.66E-01 | +++?+.. | 5.06E-02 | 10356 | 0.0107  | 0.0513 | 8.34E-01 | --- | 3.75E-01 | 25166 | 0.0373  | 0.0299 | 2.12E-01 | --- | 5.23E-01 |
|     | rs3846915  | 6 | 55365381 | GRAL1  | a | g | 10973 | -0.1289 | 0.0421 | 2.22E-03 | ---?+.. | 4.66E-01 | 10302 | -0.0362 | 0.0339 | 2.86E-01 | --- | 4.51E-01 | 25175 | -0.0727 | 0.0264 | 5.92E-03 | --- | 8.63E-02 |
|     | rs3846916  | 6 | 55365741 | GRAL1  | a | g | 14832 | -0.0995 | 0.0365 | 6.43E-03 | ---?+.. | 3.61E-01 | 10311 | 0.0097  | 0.0429 | 8.20E-01 | --- | 5.48E-01 | 25143 | -0.0536 | 0.0278 | 3.56E-03 | --- | 5.25E-02 |
|     | rs3846917  | 6 | 55365757 | GRAL1  | t | c | 14832 | 0.0986  | 0.0365 | 6.90E-03 | +++?+.. | 3.76E-01 | 10311 | 0.027   | 0.0495 | 8.85E-01 | +++ | 7.34E-01 | 25143 | 0.0734  | 0.0294 | 1.25E-02 | +++ | 2.44E-01 |
|     | rs1032772  | 6 | 55366145 | GRAL1  | a | g |       |         |        |          |         |          |       |         |        |          |     |          |       |         |        |          |     |          |

|     |            |   |           |   |   |       |         |        |          |          |          |       |         |        |          |    |          |       |         |        |          |   |          |
|-----|------------|---|-----------|---|---|-------|---------|--------|----------|----------|----------|-------|---------|--------|----------|----|----------|-------|---------|--------|----------|---|----------|
|     | rs802756   | 6 | 128295198 | a | c | 18772 | 0.1892  | 0.0646 | 3.40E-03 | +++++    | 8.84E-01 | 10362 | -0.1421 | 0.0549 | 9.65E-03 | +  | 4.89E-01 | 29134 | -0.0032 | 0.0418 | 9.40E-01 | + | 9.31E-05 |
|     | rs802755   | 6 | 128296381 | a | t | 18772 | 0.1897  | 0.0646 | 3.30E-03 | +++++    | 8.83E-01 | 10362 | -0.1421 | 0.0549 | 9.65E-03 | +  | 4.89E-01 | 29134 | -0.003  | 0.0418 | 9.44E-01 | + | 9.09E-05 |
|     | rs699418   | 6 | 128297103 | a | t | 18772 | 0.1885  | 0.0646 | 3.49E-03 | +++++    | 8.94E-01 | 10362 | -0.1421 | 0.0549 | 9.65E-03 | +  | 4.89E-01 | 29082 | -0.0035 | 0.0418 | 9.34E-01 | + | 9.63E-05 |
|     | rs699419   | 6 | 128298053 | c | g | 18772 | -0.1912 | 0.0646 | 3.09E-03 | -----    | 8.79E-01 | 10362 | 0.1421  | 0.0549 | 9.65E-03 | +  | 4.89E-01 | 29134 | 0.0023  | 0.0418 | 9.56E-01 | + | 8.44E-05 |
|     | rs1699420  | 6 | 145730555 | c | g | 18755 | 0.114   | 0.0276 | 8.96E-02 | -----    | 4.32E-01 | 10362 | -0.1397 | 0.0549 | 1.10E-02 | +  | 4.73E-01 | 29117 | 0.0882  | 0.0425 | 3.70E-01 | + | 3.46E-02 |
| 129 | rs10223879 | 6 | 145730555 | t | c | 18781 | 0.1132  | 0.0266 | 2.11E-05 | +++++    | 4.91E-01 | 9953  | 0.0144  | 0.034  | 6.71E-01 | +  | 7.73E-01 | 28734 | 0.0757  | 0.021  | 3.03E-04 | + | 2.71E-02 |
|     | rs6922610  | 6 | 145730739 | c | g | 18784 | 0.1132  | 0.0266 | 2.11E-05 | +++++    | 5.09E-01 | 9953  | 0.0148  | 0.0304 | 6.27E-01 | +  | 7.76E-01 | 28737 | 0.0705  | 0.02   | 4.26E-04 | + | 1.49E-02 |
|     | rs976921   | 6 | 145733931 | a | g | 18796 | 0.118   | 0.0276 | 1.97E-05 | +++++    | 5.80E-01 | 9951  | -0.0221 | 0.0311 | 4.77E-01 | +  | 7.54E-01 | 28740 | 0.0563  | 0.0206 | 6.41E-03 | + | 7.54E-04 |
|     | rs976922   | 6 | 145734562 | c | g | 18796 | 0.1179  | 0.0276 | 1.98E-05 | +++++    | 5.80E-01 | 9957  | -0.0048 | 0.0314 | 8.79E-01 | +  | 7.35E-01 | 28753 | 0.0644  | 0.0207 | 1.89E-03 | + | 3.34E-03 |
|     | rs9403694  | 6 | 145734571 | t | c | 18780 | -0.118  | 0.0276 | 1.96E-05 | -----    | 5.49E-01 | 9959  | 0.0004  | 0.0316 | 9.91E-01 | +  | 7.65E-01 | 28719 | -0.0668 | 0.0208 | 1.32E-03 | + | 4.77E-03 |
|     | rs4896795  | 6 | 145735282 | c | g | 16767 | -0.1053 | 0.0298 | 4.04E-04 | -?-----  | 5.90E-01 | 9959  | 0.0057  | 0.0316 | 8.56E-01 | +  | 6.89E-01 | 26726 | -0.0531 | 0.0217 | 1.44E-02 | + | 1.06E-02 |
|     | rs9393010  | 6 | 145735917 | a | g | 18799 | -0.1173 | 0.0276 | 2.18E-05 | -----    | 5.70E-01 | 9959  | 0.0128  | 0.0319 | 6.88E-01 | +  | 6.08E-01 | 28758 | -0.0166 | 0.0209 | 3.16E-03 | + | 2.04E-03 |
|     | rs9479280  | 6 | 145736790 | c | g | 18799 | 0.1173  | 0.0276 | 2.18E-05 | +++++    | 5.70E-01 | 9959  | -0.0023 | 0.0323 | 9.44E-01 | +  | 7.28E-01 | 28758 | 0.0688  | 0.021  | 1.45E-03 | + | 4.88E-03 |
|     | rs6939342  | 6 | 145737056 | c | g | 18799 | 0.116   | 0.0276 | 2.67E-05 | +++++    | 6.20E-01 | 9959  | 0.0025  | 0.0325 | 9.38E-01 | +  | 7.85E-01 | 28758 | 0.0684  | 0.021  | 1.14E-03 | + | 7.77E-03 |
|     | rs12661545 | 6 | 145738189 | a | c | 18767 | -0.1053 | 0.0298 | 4.04E-04 | -?-----  | 5.99E-01 | 9959  | -0.007  | 0.0331 | 8.25E-01 | +  | 8.44E-01 | 26726 | -0.0615 | 0.0221 | 5.51E-03 | + | 3.9E-02  |
|     | rs9393011  | 6 | 145739230 | a | g | 18799 | 0.1173  | 0.0276 | 2.18E-05 | +++++    | 5.70E-01 | 9959  | -0.0068 | 0.0345 | 8.43E-01 | +  | 6.69E-01 | 28758 | 0.0689  | 0.0216 | 1.40E-03 | + | 4.97E-03 |
|     | rs1970321  | 6 | 145740415 | a | g | 16767 | -0.1053 | 0.0298 | 4.04E-04 | -?-----  | 5.90E-01 | 9959  | -0.0017 | 0.0348 | 9.61E-01 | +  | 7.71E-01 | 26726 | -0.0615 | 0.0226 | 6.16E-03 | + | 2.37E-02 |
|     | rs1970320  | 6 | 145740538 | a | g | 14823 | 0.1388  | 0.0308 | 6.74E-06 | +++++    | 7.73E-01 | 9959  | 0.0117  | 0.0359 | 7.43E-01 | +  | 8.56E-01 | 24782 | 0.0849  | 0.0234 | 2.81E-04 | + | 7.21E-03 |
|     | rs4370382  | 6 | 145741896 | t | c | 18799 | 0.1173  | 0.0276 | 2.18E-05 | +++++    | 5.70E-01 | 9959  | 0.0251  | 0.037  | 4.98E-01 | +  | 9.31E-01 | 28758 | 0.0843  | 0.0221 | 1.38E-04 | + | 4.58E-02 |
|     | rs12181026 | 6 | 145742068 | a | g | 18813 | -0.117  | 0.0276 | 2.32E-05 | -----    | 5.54E-01 | 10363 | 0.0167  | 0.0364 | 6.46E-01 | +  | 5.56E-01 | 29176 | -0.0682 | 0.022  | 1.93E-03 | + | 4.32E-03 |
|     | rs973455   | 6 | 145745918 | a | g | 16478 | 0.1245  | 0.0298 | 2.98E-05 | +++++    | 4.89E-01 | 10363 | 0.0242  | 0.0343 | 4.81E-01 | +  | 8.47E-01 | 26841 | 0.0814  | 0.0225 | 2.99E-04 | + | 2.73E-02 |
|     | rs9403696  | 6 | 145746024 | c | g | 12661 | -0.1018 | 0.0336 | 2.44E-03 | -?-----  | 5.60E-01 | 10363 | -0.0242 | 0.0343 | 4.81E-01 | +  | 8.47E-01 | 23024 | -0.0638 | 0.024  | 7.86E-03 | + | 1.06E-01 |
|     | rs9386116  | 6 | 145747747 | c | g | 12644 | 0.1001  | 0.0334 | 2.73E-03 | +++++    | 4.45E-01 | 10342 | 0.0297  | 0.0341 | 3.84E-01 | +  | 8.38E-01 | 22986 | 0.0656  | 0.0239 | 5.95E-03 | + | 1.40E-01 |
|     | rs976923   | 6 | 145750671 | a | g | 18816 | 0.1162  | 0.0276 | 2.60E-05 | +++++    | 6.03E-01 | 10363 | 0.0242  | 0.0343 | 4.81E-01 | +  | 8.47E-01 | 29179 | 0.08    | 0.0215 | 1.97E-04 | + | 3.67E-02 |
|     | rs12664698 | 6 | 145751064 | a | g | 16471 | -0.1146 | 0.0298 | 2.98E-05 | -?-----  | 4.75E-01 | 10362 | -0.0249 | 0.0343 | 4.57E-01 | +  | 8.49E-01 | 26833 | -0.0817 | 0.0225 | 1.49E-04 | + | 6.32E-01 |
|     | rs4896799  | 6 | 145754233 | c | g | 18791 | -0.1173 | 0.0277 | 2.35E-05 | -----    | 5.61E-01 | 10366 | -0.031  | 0.0344 | 3.67E-01 | +  | 7.99E-01 | 29147 | -0.0834 | 0.0216 | 1.12E-04 | + | 5.07E-02 |
|     | rs976924   | 6 | 145757206 | a | c | 16476 | -0.1256 | 0.0298 | 2.55E-05 | -----    | 5.09E-01 | 10362 | -0.0244 | 0.0343 | 4.76E-01 | +  | 8.27E-01 | 26838 | -0.0821 | 0.0225 | 2.64E-04 | + | 2.59E-02 |
|     | rs2039698  | 6 | 145758660 | t | c | 18804 | -0.1183 | 0.0276 | 1.89E-05 | -----    | 5.52E-01 | 10362 | -0.0239 | 0.0343 | 4.86E-01 | +  | 8.70E-01 | 29166 | -0.0812 | 0.0215 | 1.05E-04 | + | 3.20E-02 |
|     | rs1856266  | 6 | 145758996 | c | g | 18802 | -0.1196 | 0.0276 | 1.52E-05 | -----    | 5.58E-01 | 10362 | -0.0239 | 0.0343 | 4.86E-01 | +  | 8.70E-01 | 29164 | -0.082  | 0.0215 | 1.37E-04 | + | 2.97E-02 |
|     | rs1856264  | 6 | 145759813 | c | g | 18801 | 0.1214  | 0.0277 | 1.14E-05 | +++++    | 5.42E-01 | 10362 | 0.0239  | 0.0343 | 4.86E-01 | +  | 8.70E-01 | 29163 | 0.0829  | 0.0216 | 1.19E-04 | + | 2.70E-02 |
|     | rs976925   | 6 | 145763699 | a | c | 18798 | -0.1242 | 0.0277 | 7.55E-06 | -----    | 4.87E-01 | 10361 | -0.022  | 0.0343 | 5.22E-01 | +  | 8.96E-01 | 29159 | -0.0839 | 0.0216 | 9.97E-05 | + | 2.05E-02 |
|     | rs9403698  | 6 | 145765403 | a | g | 18798 | -0.1247 | 0.0277 | 6.87E-06 | -----    | 4.87E-01 | 10361 | -0.022  | 0.0343 | 5.22E-01 | +  | 8.96E-01 | 29159 | -0.0842 | 0.0216 | 9.41E-05 | + | 1.98E-02 |
|     | rs9393018  | 6 | 145765544 | t | c | 18798 | 0.1249  | 0.0277 | 6.65E-06 | +++++    | 4.63E-01 | 10361 | 0.022   | 0.0343 | 5.22E-01 | +  | 8.96E-01 | 29159 | 0.0843  | 0.0216 | 9.19E-05 | + | 1.96E-02 |
|     | rs4895800  | 6 | 145767242 | a | g | 16485 | -0.1334 | 0.0299 | 8.27E-06 | -?-----  | 4.11E-01 | 10361 | -0.022  | 0.0343 | 5.22E-01 | +  | 8.96E-01 | 26826 | -0.0853 | 0.0225 | 1.54E-04 | + | 1.44E-02 |
|     | rs9393045  | 6 | 145768187 | a | g | 16465 | 0.1437  | 0.0299 | 7.86E-06 | +++++    | 4.06E-01 | 10361 | 0.022   | 0.0343 | 5.22E-01 | +  | 8.96E-01 | 26826 | 0.0855  | 0.0225 | 1.49E-04 | + | 1.44E-02 |
|     | rs1355145  | 6 | 145770275 | c | g | 16758 | 0.1182  | 0.0298 | 7.38E-05 | +++++    | 4.38E-01 | 10357 | 0.02    | 0.0342 | 5.60E-01 | +  | 8.86E-01 | 27115 | 0.0758  | 0.0225 | 7.39E-04 | + | 3.04E-02 |
|     | rs1155417  | 6 | 145770647 | t | c | 18787 | -0.1283 | 0.0277 | 3.51E-06 | -----    | 4.58E-01 | 10357 | -0.02   | 0.0342 | 5.60E-01 | +  | 8.86E-01 | 29144 | -0.0824 | 0.0215 | 7.27E-05 | + | 1.39E-02 |
|     | rs976933   | 6 | 145780158 | a | g | 12777 | 0.1321  | 0.0339 | 9.72E-05 | +++++    | 7.83E-01 | 10337 | 0.0279  | 0.0342 | 4.14E-01 | +  | 9.25E-01 | 23114 | 0.0805  | 0.0241 | 8.32E-04 | + | 3.05E-02 |
|     | rs4142213  | 6 | 145781563 | t | c | 12783 | -0.0499 | 0.0337 | 1.39E-01 | -?+?+?+? | 4.10E-01 | 10328 | -0.0195 | 0.0343 | 5.69E-01 | +  | 8.60E-01 | 23111 | -0.035  | 0.024  | 1.46E-01 | + | 5.27E-01 |
| 130 | rs9383557  | 6 | 151504339 | t | g | 14829 | 0.1248  | 0.0296 | 2.52E-05 | +++++    | 6.22E-02 | 7457  | 0.012   | 0.0374 | 7.48E-01 | ?? | 1.00E+00 | 22286 | 0.0814  | 0.0232 | 4.56E-04 | + | 1.80E-02 |
| 131 | rs2181069  | 6 | 155846341 | t | c | 18771 | 0.0739  | 0.032  | 2.10E-02 | +++++    | 2.18E-02 | 10341 | 0.1     | 0.0372 | 7.21E-03 | +  | 4.51E-01 | 29112 | 0.085   | 0.0243 | 4.59E-04 | + | 5.95E-01 |
|     | rs1756131  | 6 | 155851382 | a | g | 18794 | 0.1044  | 0.0294 | 3.78E-04 | +++++    | 3.16E-01 | 10362 | 0.0775  | 0.0345 | 2.49E-02 | +  | 1.35E-01 | 29156 | 0.0931  | 0.0224 | 3.19E-05 | + | 5.53E-01 |
|     | rs1156027  | 6 | 155852038 | a | g | 18778 | 0.0788  | 0.0312 | 1.14E-02 | +++++    | 4.12E-02 | 10323 | 0.0979  | 0.036  | 6.54E-03 | +  | 1.89E-01 | 29101 | 0.087   | 0.0236 | 2.25E-04 | + | 6.89E-01 |
|     | rs4898956  | 6 | 155855586 | a | g | 18620 | 0.1145  | 0.0313 | 2.59E-04 | +++++    | 4.84E-01 | 10352 | 0.0859  | 0.0357 | 1.60E-02 | +  | 2.10E-01 | 28972 | 0.1021  | 0.0235 | 1.45E-05 | + | 5.47E-01 |
|     | rs12665958 | 6 | 155861084 | a | g | 16590 | -0.1511 | 0.0342 | 7.63E-04 | -?-----  | 2.40E-01 | 10383 | -0.0909 | 0.0371 | 1.41E-02 | +  | 2.76E-01 | 28873 | -0.1104 | 0.0251 | 3.35E-05 | + | 6.32E-01 |
|     | rs1219778  | 6 | 155865681 | t | c | 14824 | 0.0744  | 0.0239 | 8.25E-02 | +++++    | 2.80E-01 | 7872  | 0.0557  | 0.0399 | 1.63E-01 | -? | 2.96E-01 | 26296 | 0.0664  | 0.0258 | 9.98E-03 | + | 7.21E-01 |
| 132 | rs9478656  | 6 | 155868148 | c | g | 8636  | -0.1154 | 0.037  | 1.83E-03 | -?+?+?   | 4.40E-01 | 7487  | -0.046  | 0.0342 | 1.79E-01 | ?? | 1.00E+00 | 16123 | -0.078  | 0.0251 | 1.90E-03 | + | 1.68E-01 |
|     | rs9397820  | 6 | 155879090 | t | c | 14714 | 0.0897  | 0.0266 | 7.66E-04 | +++++    | 1.20E-01 | 7842  | 0.0322  | 0.0335 | 3.36E-01 | -? | 6.48E-02 | 22556 | 0.0675  | 0.0208 | 1.20E-03 | + | 1.79E-01 |
|     | rs9371892  | 6 | 155882462 | t | c | 14830 | -0.0924 | 0.0265 | 5.00E-04 | -?+?+?   | 9.26E-02 | 7842  | -0.0291 | 0.0334 | 3.83E-01 | +  | 6.26E-02 | 22672 | -0.0679 | 0.0208 | 1.06E-03 | + | 1.38E-01 |
|     | rs9478657  | 6 | 155900649 | a | g | 10976 | -0.1134 | 0.0294 | 1.16E-04 | -?+?+?   | 5.68E-01 | 7840  | -0.024  | 0.0335 | 4.73E-01 | +  | 8.31E-02 | 18816 | -0.0745 | 0.0221 | 7.47E-04 | + | 4.49E-02 |
| 133 | rs6976086  | 7 | 15015136  | t | g | 16955 | 0.0798  | 0.0265 | 2.60E-03 | +++++    | 5.67E-01 | 10347 | 0.1148  | 0.0315 | 2.75E-04 | +  | 8.04E-01 | 27302 | 0.0943  | 0.0203 | 3.31E-06 | + | 3.95E-01 |

|     |             |   |          |         |   |   |       |         |        |            |         |          |       |         |        |          |     |          |       |         |        |          |     |          |
|-----|-------------|---|----------|---------|---|---|-------|---------|--------|------------|---------|----------|-------|---------|--------|----------|-----|----------|-------|---------|--------|----------|-----|----------|
|     | rs10257587  | 7 | 68177744 | AUTS2   | t | c | 18816 | -0.1411 | 0.0415 | 6.69E-04   | -----   | 4.74E-01 | 2875  | -0.0255 | 0.1031 | 8.05E-01 | --? | 8.78E-01 | 21691 | -0.125  | 0.0385 | 1.17E-03 | --  | 2.98E-01 |
|     | rs4305786   | 6 | 68780076 | AUTS2   | a | g | 18812 | 0.1443  | 0.0415 | 5.03E-04   | +++++   | 4.91E-01 | 2875  | 0.0255  | 0.1031 | 8.05E-01 | ++? | 8.78E-01 | 21687 | 0.1277  | 0.0385 | 9.07E-04 | ++  | 2.85E-01 |
|     | rs17140817  | 6 | 68799931 | AUTS2   | t | c | 18816 | -0.0802 | 0.0414 | 5.27E-02   | -----   | 4.99E-02 | 2865  | -0.0224 | 0.1046 | 8.31E-01 | --? | 8.68E-01 | 21681 | -0.0774 | 0.0385 | 6.01E-02 | --  | 6.07E-01 |
|     | rs19375481  | 6 | 68800200 | AUTS2   | a | t | 18816 | -0.1428 | 0.0415 | 5.77E-04   | -----   | 4.96E-01 | 2875  | -0.0255 | 0.1031 | 8.05E-01 | --? | 8.78E-01 | 21691 | -0.1264 | 0.0385 | 1.02E-03 | --  | 2.91E-01 |
|     | rs102404015 | 7 | 68817129 | AUTS2   | a | g | 18816 | 0.1429  | 0.0415 | 5.71E-04   | +++++   | 4.95E-01 | 2875  | 0.0255  | 0.1031 | 8.05E-01 | ++? | 8.78E-01 | 21691 | 0.1265  | 0.0385 | 1.01E-03 | ++  | 2.91E-01 |
|     | rs10242206  | 6 | 68809542 | AUTS2   | t | c | 18813 | -0.1423 | 0.0415 | 6.16E-04   | -----   | 5.04E-01 | 2875  | -0.0255 | 0.1031 | 8.05E-01 | --? | 8.78E-01 | 21688 | -0.1285 | 0.0385 | 1.08E-03 | --  | 2.94E-01 |
|     | rs10244247  | 6 | 68831755 | AUTS2   | a | g | 16507 | 0.1729  | 0.0495 | 4.73E-04   | +++++   | 7.93E-01 | 2811  | 0.0225  | 0.1148 | 8.45E-01 | ++? | 5.17E-01 | 19318 | 0.1493  | 0.0455 | 1.02E-03 | ++  | 2.29E-01 |
|     | rs10269267  | 6 | 68857073 | AUTS2   | a | c | 18798 | -0.1479 | 0.0418 | 3.99E-04   | -----   | 5.34E-01 | 10362 | 0.0167  | 0.0745 | 4.08E-01 | ++? | 6.14E-01 | 19160 | -0.0977 | 0.0365 | 7.35E-03 | ++  | 1.41E-02 |
|     | rs917725    | 6 | 68861926 | AUTS2   | a | g | 18799 | 0.1485  | 0.0418 | 3.77E-04   | +++++   | 5.34E-01 | 10362 | -0.0502 | 0.0753 | 5.05E-01 | ++? | 7.00E-01 | 19161 | 0.1107  | 0.0365 | 5.39E-03 | ++  | 1.11E-02 |
|     | rs10254086  | 6 | 68878420 | AUTS2   | a | t | 18804 | -0.1501 | 0.0416 | 3.11E-04   | -----   | 5.42E-01 | 10362 | -0.0162 | 0.0795 | 8.39E-01 | --? | 9.61E-01 | 19166 | -0.1213 | 0.0369 | 9.97E-04 | --  | 2.36E-01 |
|     | rs10274099  | 6 | 68882731 | AUTS2   | a | g | 18808 | -0.1507 | 0.0416 | 2.93E-04   | -----   | 5.47E-01 | 10362 | -0.0153 | 0.0797 | 8.48E-01 | --? | 9.63E-01 | 19170 | -0.1217 | 0.0369 | 9.66E-04 | --  | 1.32E-01 |
|     | rs11769738  | 6 | 68886156 | AUTS2   | a | c | 18807 | -0.1498 | 0.0416 | 3.20E-04   | -----   | 5.37E-01 | 10362 | -0.017  | 0.0797 | 8.32E-01 | --? | 9.60E-01 | 19169 | -0.1214 | 0.0369 | 9.98E-04 | --  | 1.40E-01 |
|     | rs10268729  | 6 | 68886796 | AUTS2   | a | c | 18808 | -0.1509 | 0.0416 | 2.90E-04   | -----   | 5.44E-01 | 10361 | -0.0174 | 0.0798 | 8.27E-01 | --? | 9.57E-01 | 19169 | -0.1224 | 0.0369 | 9.09E-04 | --  | 1.38E-01 |
|     | rs1177151   | 6 | 68888242 | AUTS2   | a | g | 18808 | -0.1502 | 0.0416 | 3.08E-04   | -----   | 5.36E-01 | 10362 | -0.0107 | 0.0798 | 8.93E-01 | --? | 9.57E-01 | 19170 | -0.1205 | 0.0369 | 1.09E-03 | --  | 1.22E-01 |
|     | rs11789033  | 7 | 68888941 | AUTS2   | c | g | 18808 | -0.1502 | 0.0416 | 3.09E-04   | -----   | 5.38E-01 | 10362 | -0.0082 | 0.0809 | 9.39E-01 | --? | 9.68E-01 | 19170 | -0.1202 | 0.0369 | 1.14E-03 | --  | 1.18E-01 |
|     | rs10278978  | 6 | 68904666 | AUTS2   | a | g | 18806 | -0.1498 | 0.0416 | 3.22E-04   | -----   | 5.23E-01 | 10362 | 0.0052  | 0.081  | 9.49E-01 | ++? | 9.55E-01 | 19168 | -0.1174 | 0.037  | 1.50E-03 | ++  | 8.87E-02 |
|     | rs10245690  | 6 | 68911178 | AUTS2   | a | g | 18806 | -0.1501 | 0.0416 | 3.13E-04   | -----   | 5.19E-01 | 10362 | -0.0057 | 0.0813 | 9.45E-01 | ++? | 9.62E-01 | 19168 | -0.1201 | 0.037  | 1.18E-03 | ++  | 1.14E-01 |
|     | rs6958450   | 6 | 68917806 | AUTS2   | a | g | 18804 | 0.1517  | 0.0416 | 2.69E-04   | +++++   | 5.25E-01 | 10362 | -0.0011 | 0.0813 | 8.98E-01 | ++? | 9.61E-01 | 19166 | 0.12    | 0.037  | 1.20E-03 | ++  | 9.43E-02 |
|     | rs3800979   | 6 | 68920489 | AUTS2   | a | g | 18805 | 0.1506  | 0.0417 | 3.01E-04   | +++++   | 5.12E-01 | 10362 | -0.0035 | 0.0813 | 9.65E-01 | ++? | 9.58E-01 | 19167 | 0.1185  | 0.037  | 1.40E-03 | ++  | 9.17E-02 |
|     | rs10272781  | 6 | 68924823 | AUTS2   | c | g | 18805 | 0.1496  | 0.0417 | 3.30E-04   | +++++   | 5.01E-01 | 10362 | -0.0047 | 0.0815 | 9.54E-01 | ++? | 9.56E-01 | 19167 | 0.1176  | 0.0371 | 1.54E-03 | ++  | 9.19E-02 |
|     | rs10275721  | 6 | 68928332 | AUTS2   | t | c | 18804 | -0.1492 | 0.0417 | 3.44E-04   | -----   | 4.92E-01 | 10362 | 0.0062  | 0.0817 | 9.40E-01 | ++? | 9.53E-01 | 19166 | -0.1171 | 0.0371 | 1.62E-03 | ++  | 9.02E-02 |
|     | rs7784950   | 6 | 68929094 | AUTS2   | a | g | 18807 | 0.1491  | 0.0417 | 3.44E-04   | +++++   | 4.92E-01 | 10362 | -0.005  | 0.0818 | 9.52E-01 | ++? | 9.55E-01 | 19169 | -0.1173 | 0.0372 | 1.59E-03 | ++  | 9.33E-02 |
|     | rs10487943  | 6 | 68929369 | AUTS2   | a | c | 18807 | -0.1497 | 0.0417 | 3.27E-04   | -----   | 4.79E-01 | 10362 | 0.014   | 0.0818 | 8.64E-01 | ++? | 9.30E-01 | 19169 | -0.1139 | 0.0372 | 1.81E-03 | ++  | 7.46E-02 |
|     | rs10295969  | 6 | 68931447 | AUTS2   | t | c | 18807 | 0.1496  | 0.0417 | 3.28E-04   | +++++   | 4.75E-01 | 10362 | -0.0176 | 0.0822 | 8.31E-01 | ++? | 9.14E-01 | 19169 | -0.1154 | 0.0372 | 1.92E-03 | ++  | 6.97E-02 |
|     | rs17140938  | 6 | 68931833 | AUTS2   | t | c | 18811 | -0.1507 | 0.0418 | 3.07E-04   | -----   | 4.36E-01 | 10362 | -0.0099 | 0.0826 | 9.57E-01 | ++? | 8.84E-01 | 19167 | 0.1118  | 0.0371 | 1.54E-04 | ++  | 8.78E-02 |
|     | rs2658504   | 6 | 68932444 | AUTS2   | c | g | 18811 | 0.149   | 0.0416 | 3.46E-04   | +++++   | 4.86E-01 | 10362 | 0.0034  | 0.0829 | 9.74E-01 | ++? | 7.83E-01 | 14686 | 0.1292  | 0.0387 | 8.34E-04 | ++  | 1.97E-01 |
|     | rs740946    | 6 | 68939549 | AUTS2   | c | g | 16516 | 0.1879  | 0.0497 | 1.55E-04   | +++++   | 8.00E-01 | 2813  | -0.0072 | 0.1174 | 9.51E-01 | ++? | 6.69E-01 | 19329 | -0.1582 | 0.0458 | 5.45E-04 | ++  | 1.26E-01 |
|     | rs1000874   | 6 | 68945639 | AUTS2   | a | g | 18811 | -0.1485 | 0.0416 | 3.63E-04   | -----   | 4.90E-01 | 2875  | -0.0034 | 0.1049 | 9.74E-01 | ++? | 7.83E-01 | 12168 | -0.1288 | 0.0387 | 8.68E-04 | ++  | 1.99E-01 |
|     | rs10216186  | 6 | 69033104 | AUTS2   | a | c | 14803 | 0.1649  | 0.0455 | 2.94E-04   | +++++   | 6.14E-01 | 10135 | -0.0789 | 0.0693 | 2.55E-01 | ++? | 6.96E-01 | 24938 | 0.0915  | 0.038  | 1.62E-02 | ++  | 3.27E-03 |
|     | rs11770963  | 6 | 69425726 | AUTS2   | a | g | 18656 | 0.146   | 0.0416 | 4.46E-04   | +++++   | 8.73E-01 | 10357 | 0.0103  | 0.0697 | 8.82E-01 | ++? | 9.31E-01 | 29013 | 0.1034  | 0.0357 | 2.01E-03 | ++  | 9.46E-02 |
| 141 | rs10241548  | 7 | 77040630 | PTNP2   | g | t | 18786 | 0.1714  | 0.0624 | 6.00E-03   | +++++   | 1.96E-01 | 2853  | -0.1504 | 0.1512 | 3.20E-01 | ++? | 1.07E-02 | 21639 | 0.1246  | 0.0577 | 3.08E-02 | ++  | 4.91E-02 |
|     | rs1582304   | 7 | 77055410 | PTNP2   | a | t | 18785 | 0.1709  | 0.0623 | 6.10E-03   | +++++   | 1.95E-01 | 2853  | -0.1504 | 0.1512 | 3.20E-01 | ++? | 1.07E-02 | 21638 | 0.1245  | 0.0576 | 3.10E-02 | ++  | 4.94E-02 |
|     | rs10273942  | 7 | 77077392 | PTNP2   | t | g | 18788 | -0.1283 | 0.0626 | 4.90E-04   | -----   | 5.04E-01 | 10306 | 0.0401  | 0.0775 | 6.05E-01 | --? | 4.58E-03 | 29094 | -0.1163 | 0.0487 | 1.70E-02 | ++  | 9.49E-03 |
| 142 | rs1779623   | 7 | 87229697 | RUMDC3B | a | g | 1720  | 0.0833  | 0.0278 | 2.78E-03   | +++++   | 6.99E-01 | 7848  | 0.0029  | 0.0299 | 9.30E-01 | ++? | 1.41E-02 | 20568 | 0.0498  | 0.0212 | 1.90E-02 | ++  | 6.20E-02 |
|     | rs1029424   | 7 | 87254977 | RUMDC3B | t | c | 1423  | 0.0924  | 0.0256 | 3.10E-04   | +++++   | 2.79E-02 | 10287 | 0.0268  | 0.0314 | 9.66E-01 | ++? | 2.27E-02 | 21689 | 0.0572  | 0.0202 | 4.72E-03 | ++  | 2.47E-02 |
|     | rs12704370  | 7 | 87268605 | RUMDC3B | a | g | 10710 | -0.0449 | 0.0307 | 1.44E-01   | ???     | 1.07E-01 | 7841  | -0.0075 | 0.0329 | 8.20E-01 | --? | 4.74E-02 | 18551 | -0.0275 | 0.0224 | 2.21E-01 | ++  | 4.06E-01 |
|     | rs2279542   | 7 | 87402433 | ADAM2   | c | g | 6847  | 0.0861  | 0.0418 | 3.95E-02   | ???     | 1.67E-01 | 7487  | 0.021   | 0.0337 | 5.33E-01 | ??? | 1.00E-04 | 14334 | 0.0662  | 0.0256 | 7.54E-02 | ++  | 2.25E-01 |
| 143 | rs19781117  | 6 | 92922601 | CALCR   | a | g | 14720 | -0.0833 | 0.0283 | 3.28E-03   | +?..?.. | 1.76E-01 | 10349 | -0.0354 | 0.0305 | 2.46E-01 | --- | 6.45E-01 | 25069 | -0.0621 | 0.0207 | 3.21E-03 | --- | 2.50E-01 |
|     | rs2283006   | 6 | 92923658 | CALCR   | a | g | 14720 | -0.0832 | 0.0283 | 3.31E-03   | +?..?.. | 1.75E-01 | 10349 | -0.0382 | 0.0305 | 2.09E-01 | --- | 6.69E-01 | 25069 | -0.0624 | 0.0207 | 6.46E-03 | --- | 2.80E-01 |
|     | rs6976031   | 6 | 92926362 | CALCR   | c | g | 14727 | -0.0832 | 0.0282 | 3.16E-03   | +?..?.. | 1.62E-01 | 10303 | -0.0349 | 0.0305 | 2.52E-01 | --- | 6.34E-01 | 25030 | -0.0609 | 0.0207 | 3.25E-03 | --- | 2.45E-01 |
|     | rs2074120   | 6 | 92945029 | CALCR   | a | c | 18748 | 0.0861  | 0.0244 | 4.27E-04   | +++++   | 3.17E-01 | 10359 | 0.0345  | 0.0304 | 2.57E-01 | +++ | 6.62E-01 | 29107 | 0.0659  | 0.019  | 5.36E-04 | +++ | 1.86E-01 |
|     | rs2299253   | 6 | 92947991 | CALCR   | t | c | 18750 | 0.0868  | 0.0244 | 3.84E-04   | +++++   | 3.32E-01 | 10360 | 0.0331  | 0.0304 | 2.77E-01 | +++ | 6.78E-01 | 29110 | 0.0658  | 0.019  | 5.49E-04 | +++ | 1.68E-01 |
|     | rs10488542  | 6 | 92952300 | CALCR   | t | g | 18749 | 0.0866  | 0.0244 | 3.96E-04   | +++++   | 3.39E-01 | 10360 | 0.0345  | 0.0304 | 2.57E-01 | +++ | 6.62E-01 | 29109 | 0.0662  | 0.019  | 5.05E-04 | +++ | 1.81E-01 |
|     | rs9690762   | 6 | 92953866 | CALCR   | a | g | 18750 | 0.0863  | 0.0244 | 4.18E-04   | +++++   | 3.41E-01 | 10360 | 0.0345  | 0.0304 | 2.57E-01 | +++ | 6.62E-01 | 29110 | 0.066   | 0.019  | 5.23E-04 | +++ | 1.75E-01 |
|     | rs2301680   | 6 | 92954235 | CALCR   | a | g | 18737 | 0.0858  | 0.0245 | 4.50E-04</ |         |          |       |         |        |          |     |          |       |         |        |          |     |          |

| rs11768363 | 7 | 147050616 | CNTNAP2  | t | c | 4512  | 0.1095  | 0.0706 | 1.21e-01 | ?????? | 1.69e-03  | 10324 | -0.0551 | 0.0372 | 1.38e-01 | ++ | 1.25e-01 | 14836 | -0.0193 | 0.0329 | 5.57e-01 | ++ | 3.92e-02 |
|------------|---|-----------|----------|---|---|-------|---------|--------|----------|--------|-----------|-------|---------|--------|----------|----|----------|-------|---------|--------|----------|----|----------|
| rs1078756  | 7 | 156672759 | UBE3C    | t | c | 18775 | 0.8007  | 0.0231 | 4.67e-04 | +++++  | 7.42e-03  | 10348 | 0.0454  | 0.0285 | 1.12e-01 | ++ | 2.17e-01 | 29123 | 0.0667  | 0.0179 | 2.02e-04 | ++ | 3.76e-01 |
| rs10251112 | 7 | 156665285 | UBE3C    | a | g | 18781 | 0.0887  | 0.0231 | 1.15e-04 | +++++  | 4.30e-02  | 10342 | 0.0463  | 0.0285 | 1.05e-01 | ++ | 2.29e-01 | 29123 | 0.077   | 0.0179 | 5.79e-05 | ++ | 2.47e-01 |
| rs696244   | 7 | 156697773 | UBE3C    | a | g | 18813 | 0.0793  | 0.023  | 5.50e-04 | +++++  | 1.04e-02  | 10362 | 0.046   | 0.0285 | 1.06e-01 | ++ | 2.61e-01 | 29175 | 0.0662  | 0.0179 | 2.18e-04 | ++ | 3.63e-01 |
| rs0979973  | 7 | 156700978 | UBE3C    | a | g | 18816 | 0.0649  | 0.0233 | 3.34e-05 | +++++  | 1.09e-01  | 10354 | 0.0502  | 0.0285 | 7.84e-02 | ++ | 6.45e-01 | 29170 | 0.059   | 0.011  | 1.07e-03 | ++ | 6.90e-01 |
| rs10228145 | 7 | 156700758 | UBE3C    | a | g | 18824 | 0.0905  | 0.023  | 8.24e-05 | +++++  | 5.37e-02  | 10362 | 0.0472  | 0.0284 | 9.69e-02 | ++ | 2.78e-01 | 29176 | 0.0733  | 0.0179 | 4.07e-05 | ++ | 2.36e-01 |
| rs2051877  | 7 | 156701574 | UBE3C    | a | t | 18812 | 0.0796  | 0.023  | 5.31e-04 | +++++  | 1.01e-02  | 10363 | 0.0472  | 0.0284 | 9.69e-02 | ++ | 2.78e-01 | 29175 | 0.0668  | 0.0179 | 1.87e-04 | ++ | 3.75e-01 |
| rs2051876  | 7 | 156701798 | UBE3C    | a | g | 18790 | -0.0796 | 0.023  | 5.38e-04 | -----  | 9.85e-03  | 10346 | -0.045  | 0.0285 | 1.14e-01 | ++ | 2.32e-01 | 29136 | -0.066  | 0.0179 | 2.29e-04 | ++ | 3.45e-01 |
| rs933344   | 7 | 156704026 | UBE3C    | a | t | 17028 | 0.0746  | 0.0233 | 1.39e-03 | +++++  | 9.58e-03  | 10363 | -0.0551 | 0.0285 | 5.31e-02 | ++ | 4.32e-01 | 27391 | 0.0226  | 0.018  | 2.10e-01 | ++ | 4.26e-04 |
| rs1182363  | 7 | 156711912 | UBE3C    | a | g | 18810 | -0.0794 | 0.023  | 5.46e-04 | -----  | -9.63e-03 | 10363 | -0.0464 | 0.0285 | 1.04e-01 | ++ | 2.84e-01 | 29173 | -0.0664 | 0.0179 | 2.08e-04 | ++ | 3.68e-01 |
| rs1182360  | 7 | 156713311 | UBE3C    | c | g | 18811 | 0.0917  | 0.023  | 6.62e-05 | +++++  | 3.97e-02  | 10351 | 0.0495  | 0.0285 | 8.27e-02 | ++ | 2.95e-01 | 29162 | 0.0751  | 0.0179 | 2.75e-05 | ++ | 2.49e-01 |
| rs6459742  | 7 | 156719745 | UBE3C    | a | g | 18770 | -0.065  | 0.0234 | 5.47e-03 | -----  | 9.81e-02  | 10356 | -0.049  | 0.0285 | 8.58e-02 | ++ | 7.5e-01  | 29126 | -0.0586 | 0.0181 | 1.20e-03 | ++ | 6.64e-01 |
| rs6459743  | 7 | 156719869 | UBE3C    | a | g | 18799 | -0.0755 | 0.0231 | 1.07e-03 | -----  | 7.71e-02  | 10358 | -0.0474 | 0.0285 | 9.61e-02 | ++ | 3.30e-01 | 29157 | -0.064  | 0.0179 | 3.35e-04 | ++ | 4.44e-01 |
| rs1182438  | 7 | 156720199 | UBE3C    | a | g | 12623 | 0.048   | 0.0271 | 7.63e-02 | -----  | 1.84e-03  | 10358 | 0.0494  | 0.0284 | 8.26e-02 | ++ | 3.08e-01 | 22981 | 0.0487  | 0.0196 | 1.31e-02 | ++ | 9.72e-01 |
| rs6948082  | 7 | 156721641 | UBE3C    | a | g | 17015 | -0.069  | 0.0235 | 3.30e-02 | -----  | 1.81e-01  | 10358 | -0.0488 | 0.0285 | 8.55e-02 | ++ | 3.15e-01 | 27373 | -0.0608 | 0.0181 | 7.95e-04 | ++ | 5.85e-01 |
| rs3779598  | 7 | 156723619 | UBE3C    | a | g | 16766 | 0.0662  | 0.0245 | 6.79e-03 | +++++  | 1.59e-02  | 10358 | 0.0488  | 0.0285 | 8.55e-02 | ++ | 3.15e-01 | 27124 | 0.0588  | 0.0186 | 1.55e-03 | ++ | 6.43e-01 |
| rs6960676  | 7 | 156723678 | UBE3C    | a | g | 18729 | -0.0721 | 0.0231 | 1.83e-03 | -----  | 4.95e-02  | 10330 | -0.0399 | 0.0285 | 1.62e-01 | ++ | 2.05e-01 | 29059 | -0.0593 | 0.0179 | 9.45e-04 | ++ | 3.80e-01 |
| rs6459745  | 7 | 156723949 | UBE3C    | c | g | 16793 | 0.0476  | 0.0247 | 5.36e-02 | +++++  | 2.57e-01  | 10354 | 0.0481  | 0.0285 | 9.13e-02 | ++ | 3.22e-01 | 27147 | 0.0478  | 0.0187 | 1.04e-02 | ++ | 9.89e-01 |
| rs10266129 | 7 | 156725148 | UBE3C    | a | g | 16748 | 0.0464  | 0.0247 | 6.06e-02 | +++++  | 2.60e-01  | 10354 | 0.0489  | 0.0284 | 8.52e-02 | ++ | 3.15e-01 | 27102 | 0.0475  | 0.0186 | 1.09e-02 | ++ | 9.47e-01 |
| rs10266518 | 7 | 156725451 | UBE3C    | a | g | 16706 | 0.0469  | 0.0248 | 5.81e-02 | +++++  | 2.64e-01  | 10353 | 0.045   | 0.0284 | 1.13e-01 | ++ | 3.82e-01 | 27059 | 0.0469  | 0.0187 | 1.36e-02 | ++ | 9.60e-01 |
| rs12730254 | 7 | 158759008 | VPR2     | c | g | 8713  | -0.0775 | 0.0429 | 7.08e-02 | -----  | 8.36e-01  | 10169 | -0.0333 | 0.0332 | 3.16e-01 | ++ | 6.51e-01 | 18882 | -0.0499 | 0.0263 | 5.76e-02 | ++ | 4.15e-01 |
| rs2540359  | 7 | 158529046 | VPR2     | a | g | 6378  | 0.0632  | 0.0546 | 2.47e-01 | +++++  | 7.71e-01  | 10169 | 0.0333  | 0.0332 | 3.16e-01 | ++ | 6.51e-01 | 16547 | 0.0414  | 0.0263 | 1.45e-01 | ++ | 6.40e-01 |
| rs7784586  | 7 | 158529140 | VPR2     | t | c | 8713  | 0.0749  | 0.0429 | 8.09e-02 | +++++  | 8.41e-01  | 10169 | 0.0325  | 0.0332 | 3.27e-01 | ++ | 6.50e-01 | 18882 | 0.0484  | 0.0263 | 5.54e-02 | ++ | 4.34e-01 |
| rs7392117  | 7 | 158541582 | VPR2     | a | g | 1714  | 0.0679  | 0.045  | 1.31e-01 | +++++  | 7.35e-01  | 9973  | 0.0224  | 0.034  | 5.10e-01 | ++ | 5.99e-01 | 18687 | 0.0389  | 0.0271 | 1.51e-01 | ++ | 4.20e-01 |
| rs3793227  | 7 | 158542204 | VPR2     | a | g | 18885 | 0.1118  | 0.0208 | 1.96e-04 | +++++  | 5.37e-02  | 10350 | 0.0254  | 0.0352 | 4.44e-01 | ++ | 2.25e-01 | 29700 | 0.0624  | 0.0224 | 2.37e-04 | ++ | 1.79e-01 |
| rs3793223  | 7 | 158556335 | VPR2     | a | g | 18693 | -0.1141 | 0.0305 | 1.83e-04 | -----  | 5.53e-02  | 10320 | -0.0254 | 0.0342 | 4.44e-01 | ++ | 4.28e-01 | 29013 | -0.0735 | 0.0225 | 1.07e-03 | ++ | 4.91e-02 |
| rs3793227  | 7 | 158578689 | VPR2     | a | g | 18685 | 0.1144  | 0.0301 | 1.41e-04 | +++++  | 5.46e-01  | 10329 | 0.0355  | 0.0337 | 2.92e-01 | ++ | 3.98e-01 | 29104 | 0.0794  | 0.0224 | 4.06e-04 | ++ | 8.08e-02 |
| rs2270314  | 7 | 158589385 | VPR2     | c | g | 18555 | 0.1189  | 0.0306 | 1.01e-04 | +++++  | 6.32e-01  | 2853  | 0.0164  | 0.0657 | 8.03e-01 | ++ | 1.42e-01 | 21048 | 0.1006  | 0.0277 | 2.86e-04 | ++ | 1.57e-01 |
| rs3828962  | 7 | 158593367 | VPR2     | c | g | 18575 | 0.1178  | 0.0306 | 1.17e-04 | +++++  | 7.57e-01  | 2873  | 0.008   | 0.0651 | 9.03e-01 | ++ | 1.30e-01 | 21448 | 0.0979  | 0.0277 | 4.06e-04 | ++ | 1.27e-01 |
| rs17837875 | 7 | 158595844 | VPR2     | c | g | 16631 | 0.1243  | 0.0315 | 7.84e-05 | +++++  | 6.88e-01  | 2837  | 0.0252  | 0.0657 | 7.01e-01 | ++ | 1.55e-01 | 19468 | 0.1058  | 0.0284 | 1.96e-04 | ++ | 1.74e-01 |
| rs3793237  | 7 | 158604794 | VPR2     | c | g | 6574  | 0.0237  | 0.0484 | 6.25e-01 | -----  | 3.91e-02  | 2467  | 0.0421  | 0.0704 | 5.50e-01 | ++ | 1.00e+00 | 9041  | 0.0296  | 0.0399 | 4.58e-01 | ++ | 8.30e-01 |
| rs17837880 | 7 | 158607556 | VPR2     | c | g | 10691 | -0.0895 | 0.0393 | 2.26e-02 | -----  | 4.93e-01  | 9970  | -0.0419 | 0.0444 | 3.45e-01 | ++ | 7.81e-01 | 2061  | -0.0318 | 0.0294 | 2.80e-01 | ++ | 2.67e-02 |
| rs6985318  | 7 | 322993    |          | a | g | 14831 | -0.128  | 0.0364 | 4.42e-04 | -----  | 6.71e-01  | 7487  | 0.048   | 0.0413 | 2.45e-01 | ?? | 1.00e+00 | 22318 | -0.0511 | 0.0273 | 6.15e-02 | ++ | 1.39e-03 |
| rs7007915  | 7 | 323018    |          | a | g | 18730 | 0.0806  | 0.0303 | 7.81e-03 | +++++  | 4.37e-01  | 10338 | 0.0287  | 0.047  | 1.73e-02 | ++ | 3.50e-01 | 29068 | 0.01    | 0.0228 | 6.63e-01 | ++ | 3.93e-04 |
| rs1979081  | 7 | 324288    |          | a | g | 16335 | 0.0675  | 0.0328 | 4.10e-02 | ++++   | 5.31e-01  | 10348 | 0.0789  | 0.0347 | 2.32e-02 | ++ | 3.76e-01 | 29675 | 0.0082  | 0.0239 | 9.31e-01 | ++ | 5.45e-02 |
| rs1550950  | 7 | 324709    |          | a | g | 18784 | -0.0477 | 0.0301 | 1.13e-01 | -----  | 1.39e-01  | 10358 | 0.0758  | 0.0347 | 2.87e-02 | ++ | 4.47e-01 | 29142 | 0.0053  | 0.0227 | 8.15e-01 | ++ | 1.78e-03 |
| rs19802017 | 7 | 1766104   | ARHGAP10 | t | c | 18789 | -0.0863 | 0.0228 | 1.58e-04 | -----  | 3.49e-01  | 9969  | -0.0213 | 0.0289 | 4.62e-01 | ++ | 8.03e-01 | 29148 | -0.0614 | 0.0179 | 6.08e-04 | ++ | 7.74e-02 |
| rs4291722  | 7 | 15830711  |          | a | g | 14831 | -0.0973 | 0.0261 | 1.90e-04 | -----  | 9.60e-01  | 7874  | -0.0451 | 0.0331 | 1.72e-01 | ?? | 8.11e-02 | 22705 | -0.0773 | 0.0205 | 1.63e-04 | ++ | 2.16e-01 |
| rs6994058  | 7 | 15832852  |          | a | g | 14830 | -0.0866 | 0.0258 | 7.79e-04 | -----  | 8.96e-01  | 7487  | -0.027  | 0.0339 | 4.26e-01 | ?? | 1.00e+00 | 22317 | -0.0647 | 0.0205 | 1.61e-03 | ++ | 1.62e-01 |
| rs13282650 | 7 | 60465455  |          | a | g | 18756 | -0.0841 | 0.0228 | 2.33e-04 | -----  | 6.17e-02  | 9973  | -0.0294 | 0.0313 | 3.48e-01 | ?? | 2.61e-01 | 28729 | -0.0651 | 0.0184 | 4.09e-04 | ++ | 1.58e-01 |
| rs11775907 | 7 | 60467881  |          | t | g | 18806 | 0.0827  | 0.0228 | 2.95e-04 | ++++   | 5.31e-02  | 9973  | 0.0373  | 0.0294 | 2.05e-01 | ++ | 2.09e-01 | 28779 | -0.0656 | 0.018  | 2.69e-04 | ++ | 2.22e-01 |
| rs6471785  | 7 | 60471437  |          | a | g | 18765 | 0.0843  | 0.0228 | 2.23e-04 | +++++  | 5.66e-02  | 9974  | 0.0333  | 0.0294 | 2.57e-01 | ++ | 2.55e-01 | 28739 | -0.0651 | 0.018  | 2.99e-04 | ++ | 1.70e-01 |
| rs3942395  | 7 | 60472404  |          | a | g | 18787 | -0.0846 | 0.0228 | 2.08e-04 | -----  | 4.86e-02  | 9958  | -0.0324 | 0.0294 | 2.70e-01 | ++ | 2.34e-01 | 28745 | -0.0651 | 0.018  | 3.09e-04 | ++ | 1.61e-01 |
| rs1554246  | 7 | 60481367  |          | a | g | 18815 | -0.0849 | 0.0228 | 2.01e-04 | -----  | 5.83e-02  | 9975  | -0.0408 | 0.031  | 1.49e-01 | ++ | 1.51e-01 | 28790 | -0.0656 | 0.0184 | 1.15e-04 | ++ | 2.97e-01 |
| rs1949477  | 7 | 60481683  |          | a | g | 18815 | -0.085  | 0.0228 | 1.96e-04 | -----  | 5.97e-02  | 9975  | -0.035  | 0.0294 | 1.44e-01 | ++ | 1.55e-01 | 28790 | -0.0656 | 0.018  | 1.27e-04 | ++ | 2.97e-01 |
| rs1401423  | 7 | 60482787  |          | a | g | 18799 | 0.0847  | 0.0228 | 2.08e-   |        |           |       |         |        |          |    |          |       |         |        |          |    |          |



|            |                   |          |                  |                |          |              |                |               |                 |          |                 |              |                |               |                 |          |                 |              |                |               |                 |          |                 |
|------------|-------------------|----------|------------------|----------------|----------|--------------|----------------|---------------|-----------------|----------|-----------------|--------------|----------------|---------------|-----------------|----------|-----------------|--------------|----------------|---------------|-----------------|----------|-----------------|
| rs10092477 | 8                 | 90653170 | a                | g              | 18787    | -0.0641      | 0.023          | 5.39e-03      | -----           | 8.88e-01 | 10339           | 0.0218       | 0.029          | 4.53e-01      | +++             | 7.45e-01 | 29126           | -0.0309      | 0.018          | 8.61e-02      | ++              | 2.03e-02 |                 |
| rs6981677  | 8                 | 90659633 | c                | g              | 18765    | -0.0617      | 0.023          | 7.29e-03      | -----           | 9.16e-01 | 10339           | 0.0218       | 0.029          | 4.53e-01      | +++             | 7.45e-01 | 29104           | -0.0295      | 0.018          | 1.02e-01      | ++              | 2.41e-02 |                 |
| <b>161</b> | <b>rs454039</b>   | <b>8</b> | <b>104172086</b> | t              | <b>c</b> | <b>18816</b> | <b>-0.1727</b> | <b>0.0484</b> | <b>3.61e-04</b> | -----    | <b>7.24e-01</b> | <b>10241</b> | <b>-0.0248</b> | <b>0.0582</b> | <b>4.62e-01</b> | ---      | <b>9.44e-01</b> | <b>29057</b> | <b>-0.1196</b> | <b>0.0372</b> | <b>1.31e-01</b> | ++       | <b>8.62e-02</b> |
| <b>162</b> | rs1450188         | 8        | 106690657        | ZFPM2          | c        | 18761        | -0.0961        | 0.036         | 4.21e-03        | -----    | 4.49e-01        | 10361        | 0.0254         | 0.0408        | 5.37e-01        | +++      | 1.69e-01        | 29122        | -0.047         | 0.0259        | 7.00e-02        | ++       | 2.15e-02        |
|            | rs1031305         | 8        | 106697907        | ZFPM2          | a        | 18766        | -0.1081        | 0.035         | 2.04e-03        | -----    | 4.53e-01        | 10361        | 0.0260         | 0.0467        | 1.95e-01        | +++      | 7.14e-01        | 29129        | 0.0472         | 0.028         | 9.12e-03        | ++       | 3.81e-03        |
|            | <b>rs13281515</b> | <b>8</b> | <b>106697907</b> | <b>ZFPM2</b>   | <b>a</b> | <b>18768</b> | <b>-0.1235</b> | <b>0.035</b>  | <b>1.19e-04</b> | -----    | <b>1.16e-01</b> | <b>10361</b> | <b>0.0803</b>  | <b>0.0436</b> | <b>6.37e-02</b> | +++      | <b>7.00e-01</b> | <b>29029</b> | <b>-0.0434</b> | <b>0.0271</b> | <b>1.12e-01</b> | ++       | <b>2.58e-04</b> |
|            | rs17218607        | 8        | 106707484        | ZFPM2          | t        | 18753        | -0.0965        | 0.0352        | 6.07e-03        | -----    | 5.98e-01        | 10362        | 0.079          | 0.0466        | 8.98e-02        | +++      | 7.24e-01        | 29115        | -0.0327        | 0.0281        | 2.44e-01        | ++       | 2.66e-03        |
|            | rs17218886        | 8        | 106714133        | ZFPM2          | t        | 18742        | -0.0382        | 0.0353        | 2.79e-01        | -----    | 5.95e-01        | 10361        | 0.0931         | 0.0433        | 3.16e-02        | +++      | 7.22e-01        | 29103        | -0.0427        | 0.0241        | 6.03e-01        | ++       | 1.88e-02        |
|            | rs10505078        | 8        | 106717830        | ZFPM2          | a        | 16543        | 0.0574         | 0.0381        | 1.32e-01        | -----    | 8.84e-01        | 10315        | -0.0643        | 0.0462        | 1.64e-01        | +++      | 6.54e-01        | 26588        | 0.0081         | 0.0294        | 7.82e-01        | ++       | 4.21e-02        |
|            | rs17291297        | 8        | 106720186        | ZFPM2          | a        | 18712        | 0.0593         | 0.0355        | 9.47e-02        | -----    | 8.88e-01        | 9953         | -0.07          | 0.0439        | 1.11e-01        | ??       | 4.29e-01        | 28665        | 0.0082         | 0.0276        | 7.67e-01        | ++       | 2.20e-02        |
|            | rs13263514        | 8        | 106720599        | ZFPM2          | a        | 18704        | 0.0568         | 0.0355        | 1.09e-01        | -----    | 9.01e-01        | 9955         | -0.0778        | 0.0433        | 7.25e-02        | ??       | 4.15e-01        | 28659        | 0.0027         | 0.0275        | 9.22e-01        | ++       | 1.62e-02        |
|            | rs17219068        | 8        | 106720704        | ZFPM2          | a        | 18710        | -0.055         | 0.0355        | 1.21e-01        | -----    | 9.07e-01        | 9954         | 0.0763         | 0.0433        | 7.84e-02        | ??       | 4.26e-01        | 28664        | -0.0022        | 0.0275        | 9.36e-01        | ++       | 1.90e-02        |
|            | rs13264377        | 8        | 106720881        | ZFPM2          | t        | 18714        | 0.0553         | 0.0354        | 1.19e-01        | -----    | 9.01e-01        | 9959         | -0.0753        | 0.0433        | 8.21e-02        | ??       | 4.03e-01        | 28673        | 0.003          | 0.0274        | 9.13e-01        | ++       | 1.95e-02        |
|            | rs13254699        | 8        | 106721129        | ZFPM2          | c        | 18731        | -0.0553        | 0.0354        | 1.18e-01        | -----    | 9.02e-01        | 9968         | 0.0586         | 0.0469        | 2.12e-01        | ??       | 4.99e-01        | 28669        | -0.014         | 0.0283        | 6.21e-01        | ++       | 5.26e-02        |
|            | rs6989566         | 8        | 106721300        | ZFPM2          | t        | 14831        | -0.0724        | 0.0399        | 6.80e-02        | -----    | 9.48e-01        | 9919         | 0.0532         | 0.0477        | 2.65e-01        | ??       | 2.84e-01        | 24750        | -0.0213        | 0.0302        | 4.83e-01        | ++       | 4.34e-02        |
| <b>163</b> | <b>rs13266634</b> | <b>8</b> | <b>118253964</b> | <b>SLC30A8</b> | <b>t</b> | <b>18880</b> | <b>-0.103</b>  | <b>0.0232</b> | <b>9.42e-06</b> | -----    | <b>6.10e-01</b> | <b>10279</b> | <b>-0.0945</b> | <b>0.0292</b> | <b>1.22e-03</b> | ---      | <b>8.94e-01</b> | <b>28959</b> | <b>-0.0997</b> | <b>0.0182</b> | <b>0.40e-05</b> | ---      | <b>8.20e-02</b> |
|            | rs13820177        | 8        | 118254026        | SLC30A8        | a        | 18735        | -0.0924        | 0.0231        | 1.70e-05        | -----    | 6.10e-01        | 10279        | -0.0945        | 0.0292        | 1.22e-03        | ---      | 2.69e-01        | 28959        | -0.0997        | 0.0198        | 5.53e-05        | ---      | 1.04e-01        |
|            | rs11558471        | 8        | 118254914        | SLC30A8        | a        | 18716        | 0.0986         | 0.023         | 1.90e-05        | -----    | 5.77e-01        | 10309        | 0.0319         | 0.0387        | 4.09e-01        | +++      | 3.55e-01        | 29025        | 0.0812         | 0.0128        | 0.420e-05       | ++       | 1.38e-01        |
|            | rs11774700        | 8        | 118289451        | SLC30A8        | t        | 10777        | 0.0926         | 0.0231        | 2.93e-03        | -----    | 4.45e-01        | 10309        | 0.0373         | 0.0404        | 3.56e-01        | +++      | 3.91e-01        | 21086        | 0.072          | 0.0246        | 3.47e-03        | ++       | 2.78e-01        |
| <b>164</b> | rs4871655         | 8        | 127086430        | t              | g        | 18806        | 0.0692         | 0.0707        | 3.28e-01        | -----    | 8.62e-01        | 10356        | -0.0155        | 0.0329        | 6.38e-01        | ---      | 5.68e-01        | 29162        | -0.0004        | 0.0298        | 9.89e-01        | ++       | 2.77e-01        |
|            | rs2038288         | 8        | 127088070        | a              | t        | 18701        | -0.0597        | 0.0711        | 4.01e-01        | -----    | 8.40e-01        | 10300        | 0.0108         | 0.0329        | 7.42e-01        | -0+      | 5.95e-01        | 29001        | -0.0016        | 0.0299        | 9.56e-01        | ++       | 3.68e-01        |
|            | rs13274749        | 8        | 127096325        | t              | g        | 18699        | -0.0871        | 0.0709        | 2.19e-01        | -----    | 8.69e-01        | 10300        | -0.0237        | 0.0329        | 4.72e-01        | -0+      | 6.43e-01        | 28999        | -0.0349        | 0.0298        | 2.42e-01        | ++       | 4.77e-01        |
|            | rs10094962        | 8        | 127099117        | t              | c        | 14334        | 0.1113         | 0.0812        | 1.71e-01        | -----    | 6.50e-01        | 2816         | 0.0998         | 0.0605        | 7.10e-01        | +-?      | 3.61e-01        | 17150        | 0.0308         | 0.0309        | 0.72e-01        | ++       | 1.15e-01        |
|            | rs1285598         | 8        | 127099435        | a              | g        | 18704        | 0.1434         | 0.0699        | 3.97e-02        | -----    | 6.21e-01        | 10304        | 0.0068         | 0.0832        | 9.35e-01        | +++      | 5.08e-01        | 29008        | 0.0871         | 0.0334        | 1.03e-01        | ++       | 2.08e-01        |
|            | rs1016046         | 8        | 127101842        | a              | g        | 18702        | 0.1568         | 0.0692        | 3.38e-02        | -----    | 6.01e-01        | 10308        | 0.0042         | 0.0839        | 9.00e-01        | +++      | 5.63e-01        | 29008        | 0.0502         | 0.0433        | 2.46e-01        | ++       | 3.51e-01        |
|            | rs6474043         | 8        | 127102177        | t              | c        | 16669        | 0.2244         | 0.0699        | 1.33e-03        | -----    | 1.09e-01        | 10309        | 0.0102         | 0.03          | 7.58e-01        | +++      | 6.27e-01        | 26978        | 0.0492         | 0.0298        | 9.89e-02        | ++       | 5.59e-03        |
|            | rs1491481         | 8        | 127103048        | a              | g        | 18699        | 0.2051         | 0.0666        | 2.08e-03        | -----    | 1.22e-01        | 10310        | 0.0888         | 0.033         | 7.90e-01        | +++      | 6.21e-01        | 29009        | 0.0475         | 0.0296        | 1.08e-01        | ++       | 8.27e-03        |
|            | rs1491483         | 8        | 127105893        | a              | g        | 16667        | -0.2267        | 0.0697        | 1.15e-03        | -----    | 9.79e-01        | 10357        | -0.0077        | 0.0328        | 8.14e-01        | +++      | 5.79e-01        | 27026        | -0.0474        | 0.0297        | 1.10e-01        | ++       | 4.47e-03        |
|            | rs1491485         | 8        | 127106120        | a              | g        | 18615        | 0.1156         | 0.0549        | 3.58e-02        | -----    | 7.99e-01        | 10358        | -0.0128        | 0.0808        | 8.74e-01        | +++      | 5.74e-01        | 28973        | 0.075          | 0.0454        | 8.94e-02        | ++       | 1.89e-01        |
|            | <b>rs13281356</b> | <b>8</b> | <b>127109754</b> | <b>ZFPM2</b>   | <b>a</b> | <b>16667</b> | <b>0.235</b>   | <b>0.0662</b> | <b>3.84e-04</b> | -----    | <b>1.65e-01</b> | <b>10342</b> | <b>0.0354</b>  | <b>0.0502</b> | <b>4.82e-01</b> | +++      | <b>3.80e-01</b> | <b>27009</b> | <b>0.1083</b>  | <b>0.04</b>   | <b>6.78e-02</b> | ++       | <b>1.63e-02</b> |
|            | rs4520128         | 8        | 127111193        | a              | g        | 18615        | -0.1155        | 0.0552        | 3.64e-02        | -----    | 5.63e-01        | 10362        | 0.0248         | 0.0614        | 6.86e-01        | +++      | 5.60e-01        | 28977        | -0.0528        | 0.041         | 1.99e-01        | ++       | 8.93e-02        |
|            | rs1552704         | 8        | 127113289        | a              | g        | 18614        | 0.0835         | 0.0551        | 1.30e-01        | -----    | 1.98e-01        | 10363        | 0.0617         | 0.1           | 9.07e-01        | +++      | 5.57e-01        | 28977        | 0.0613         | 0.0483        | 2.04e-01        | ++       | 4.04e-01        |
|            | rs13279203        | 8        | 127114737        | a              | g        | 18683        | -0.1126        | 0.0546        | 3.92e-02        | -----    | 4.42e-01        | 10339        | 0.0306         | 0.0828        | 7.12e-01        | +++      | 6.68e-01        | 29022        | -0.0492        | 0.0456        | 1.29e-01        | ++       | 1.49e-01        |
|            | rs1602506         | 8        | 127115691        | a              | g        | 16665        | 0.2143         | 0.0701        | 2.23e-03        | -----    | 8.00e-01        | 10338        | 0.0114         | 0.0785        | 8.85e-01        | +++      | 7.03e-01        | 27003        | 0.2423         | 0.0523        | 1.75e-02        | ++       | 5.39e-02        |
|            | rs1602507         | 8        | 127115763        | a              | g        | 18651        | -0.1014        | 0.0647        | 6.37e-02        | -----    | 6.01e-01        | 10337        | 0.0048         | 0.0839        | 9.00e-01        | +++      | 7.03e-01        | 29008        | 0.0502         | 0.0433        | 2.46e-01        | ++       | 3.47e-01        |
|            | rs10956282        | 8        | 127117218        | a              | t        | 18672        | -0.1023        | 0.0548        | 6.18e-02        | -----    | 6.90e-01        | 10337        | -0.017         | 0.0785        | 8.29e-01        | +++      | 5.78e-01        | 29009        | 0.0744         | 0.0449        | 9.80e-02        | ++       | 3.73e-01        |
|            | rs6997268         | 8        | 127117450        | a              | g        | 16357        | -0.2017        | 0.072         | 5.07e-03        | -----    | 8.17e-01        | 10337        | -0.01          | 0.0784        | 8.98e-01        | +++      | 5.77e-01        | 26994        | -0.114         | 0.053         | 3.16e-02        | ++       | 7.17e-02        |
|            | rs6997036         | 8        | 127117547        | a              | g        | 18693        | 0.1974         | 0.0671        | 3.28e-03        | -----    | 1.50e-01        | 10337        | 0.0121         | 0.0813        | 8.77e-01        | +++      | 5.77e-01        | 29030        | 0.1189         | 0.051         | 1.96e-02        | ++       | 7.23e-02        |
|            | rs6997697         | 8        | 127117898        | a              | g        | 18691        | -0.1935        | 0.0672        | 4.00e-03        | -----    | 1.54e-01        | 10332        | 0.0094         | 0.0812        | 9.08e-01        | +++      | 5.63e-01        | 29023        | -0.111         | 0.0518        | 3.20e-02        | ++       | 5.42e-02        |
|            | rs7001995         | 8        | 127118103        | a              | g        | 16612        | -0.2007        | 0.0721        | 5.40e-03        | -----    | 1.71e-01        | 10337        | 0.0102         | 0.081         | 9.00e-01        | +++      | 5.62e-01        | 26949        | -0.1075        | 0.0539        | 4.60e-02        | ++       | 5.18e-02        |
|            | rs1032371         | 8        | 127119047        | a              | g        | 16612        | 0.2116         | 0.071         | 2.87e-03        | -----    | 1.35e-01        | 10337        | -0.0102        | 0.081         | 9.00e-01        | +++      | 5.62e-01        | 26949        | -0.1152        | 0.0534        | 3.09e-02        | ++       | 3.95e-02        |
|            | rs1032372         | 8        | 127119059        | a              | t        | 16612        | 0.2105         | 0.0709        | 3.00e-03        | -----    | 1.59e-01        | 10337        | -0.0091        | 0.0799        | 9.09e-01        | +++      | 5.64e-01        | 26949        | -0.1138        | 0.0534        | 3.19e-02        | ++       | 3.98e-02        |
|            | rs1032373         | 8        | 127119411        | a              | g        | 16608        | -0.1052        | 0.0559        | 5.81e-02        | -----    | 1.09e-01        | 10337        | -0.0017        | 0.0799        | 9.08e-01        | +++      | 5.73e-01        | 26945        | -0.1708        | 0.0454        | 1.18e-01        | ++       | 2.83e-01        |
|            | rs1552706         | 8        | 127119597        | a              | g        | 16603        | -0.0886        | 0.0505        | 7.96e-02        | -----    | 2.42e-01        | 10335        | -0.0134        | 0.0753        | 5.96e-01        | +++      | 5.77e-01        | 29028        | -0.0653        | 0.0419        | 1.20e-01        | ++       | 4.07e-01        |
|            | rs12220646        | 8        | 127121342        | a              | g        | 18671        | 0.0774         |               |                 |          |                 |              |                |               |                 |          |                 |              |                |               |                 |          |                 |

|                   |   |           |         |        |          |         |          |          |          |          |          |        |          |          |          |          |          |         |          |          |          |          |          |
|-------------------|---|-----------|---------|--------|----------|---------|----------|----------|----------|----------|----------|--------|----------|----------|----------|----------|----------|---------|----------|----------|----------|----------|----------|
| rs10990221        | g | 104456687 | a       | c      | 18796    | -0.0865 | 0.0234   | 2.21E-04 | -----    | 1.02E-01 | 2488     | 0.0113 | 0.0588   | 8.48E-01 | ?        | 1.00E+00 | 21284    | -0.0731 | 0.0217   | 7.70E-04 | ++       | 1.22E-01 |          |
| rs10990223        | g | 104457489 | a       | c      | 18786    | -0.0842 | 0.0235   | 3.37E-04 | -----    | 1.02E-01 | 2487     | 0.0117 | 0.0588   | 8.43E-01 | ?        | 1.00E+00 | 21273    | -0.0701 | 0.0218   | 1.14E-03 | ++       | 1.30E-01 |          |
| <b>rs7875761</b>  | t | 104459820 | t       | c      | 18811    | -0.092  | 0.0234   | 8.58E-05 | -----    | 1.81E-01 | 9974     | 0.0235 | 0.0305   | 4.40E-01 | ?        | 8.08E-01 | 28785    | -0.0492 | 0.0186   | 8.04E-03 | ++       | 2.66E-03 |          |
| rs10817039        | g | 112349358 | SVEP1   | a      | g        | 18768   | 0.057    | 0.0244   | 1.93E-02 | +++++    | 1.46E-01 | 10357  | 0.0347   | 0.0293   | 2.37E-01 | ++       | 8.63E-01 | 29125   | 0.0479   | 0.0187   | 1.07E-02 | ++       | 5.59E-01 |
| <b>rs10804077</b> | g | 112351799 | SVEP1   | a      | g        | 18769   | 0.0277   | 0.0244   | 1.45E-04 | +++++    | 9.82E-01 | 10357  | 0.0359   | 0.0293   | 2.21E-01 | ++       | 8.66E-01 | 29126   | 0.0694   | 0.0187   | 2.13E-04 | ++       | 1.36E-01 |
| rs16915123        | g | 112357483 | SVEP1   | t      | c        | 18756   | -0.0933  | 0.0246   | 1.50E-04 | -----    | 9.91E-01 | 10341  | 0.0338   | 0.0294   | 1.86E-01 | ++       | 8.94E-01 | 28917   | -0.0705  | 0.0189   | 1.85E-04 | ++       | 1.49E-01 |
| rs13294021        | g | 127108209 | GAPV01  | a      | g        | 14794   | 0.0812   | 0.0315   | 1.01E-02 | +++++    | 7.40E-02 | 10286  | -0.061   | 0.0478   | 2.01E-01 | ---      | 7.25E-01 | 25080   | 0.0381   | 0.0263   | 1.47E-01 | ++       | 1.30E-02 |
| <b>rs13297440</b> | c | 14772     | 0.116   | 0.0316 | 2.40E-04 | +++++   | 5.98E-01 | 10286    | -0.0568  | 0.0477   | 2.34E-01 | ---    | 7.70E-01 | 25058    | 0.0363   | 0.0263   | 1.63E-02 | ++      | 2.53E-03 |          |          |          |          |
| rs2270746         | g | 127161413 | GAPV01  | a      | g        | 18701   | -0.0683  | 0.0297   | 2.14E-02 | -----    | 2.36E-02 | 10294  | 0.0147   | 0.0398   | 7.12E-01 | ++       | 9.29E-01 | 28995   | -0.0386  | 0.0238   | 1.05E-01 | ++       | 9.47E-02 |
| rs13291306        | g | 127164619 | GAPV01  | a      | t        | 18662   | -0.0684  | 0.0298   | 2.16E-02 | -----    | 2.68E-02 | 10299  | 0.0414   | 0.0476   | 3.84E-01 | ++       | 7.98E-01 | 28961   | -0.0375  | 0.0253   | 1.38E-01 | ++       | 5.06E-02 |
| rs7044663         | g | 127308084 | MAPKAP1 | t      | c        | 16420   | 0.0525   | 0.0259   | 4.29E-02 | +++++    | 2.73E-01 | 10355  | 0.0098   | 0.0302   | 7.46E-01 | ++       | 7.35E-01 | 26775   | 0.0344   | 0.0197   | 8.01E-02 | ++       | 2.83E-01 |
| rs7875713         | g | 127308724 | MAPKAP1 | t      | g        | 16420   | 0.0526   | 0.026    | 4.26E-02 | +++++    | 2.70E-01 | 10355  | 0.0091   | 0.0302   | 7.64E-01 | ++       | 7.27E-01 | 26775   | 0.0301   | 0.0197   | 8.37E-02 | ++       | 2.75E-01 |
| rs7865246         | g | 127309332 | MAPKAP1 | t      | c        | 18753   | -0.0615  | 0.0241   | 1.07E-02 | -----    | 3.00E-01 | 10356  | -0.0088  | 0.0302   | 7.70E-01 | ---      | 7.32E-01 | 29109   | -0.0401  | 0.0188   | 2.95E-02 | ++       | 1.73E-01 |
| rs4837018         | g | 127351812 | MAPKAP1 | a      | g        | 18755   | -0.0866  | 0.0241   | 3.27E-04 | -----    | 9.92E-01 | 10343  | -0.01    | 0.0303   | 7.42E-01 | ---      | 6.98E-01 | 29098   | -0.0569  | 0.0189   | 2.55E-02 | ++       | 4.79E-02 |
| rs1253637         | g | 127354985 | MAPKAP1 | a      | g        | 18755   | -0.0608  | 0.0241   | 1.11E-02 | -----    | 2.99E-01 | 10356  | -0.0095  | 0.0302   | 7.52E-01 | ---      | 7.40E-01 | 29111   | -0.0409  | 0.0188   | 3.00E-02 | ++       | 1.85E-01 |
| rs10739663        | g | 127318560 | MAPKAP1 | a      | g        | 18755   | -0.0605  | 0.0241   | 2.1E-02  | -----    | 2.91E-01 | 10356  | -0.0088  | 0.0302   | 7.70E-01 | ---      | 7.32E-01 | 29111   | -0.0404  | 0.0188   | 3.20E-02 | ++       | 1.81E-01 |
| rs12351538        | g | 127321324 | MAPKAP1 | a      | g        | 18756   | -0.0605  | 0.0241   | 2.1E-02  | -----    | 2.86E-01 | 10353  | -0.0095  | 0.0302   | 7.53E-01 | ---      | 7.12E-01 | 29109   | -0.0407  | 0.0188   | 3.09E-02 | ++       | 1.87E-01 |
| rs516735          | g | 127337513 | MAPKAP1 | t      | c        | 18755   | -0.0608  | 0.0241   | 1.16E-02 | -----    | 2.82E-01 | 10352  | -0.0112  | 0.0302   | 7.12E-01 | ---      | 7.20E-01 | 29107   | -0.0415  | 0.0188   | 2.76E-02 | ++       | 1.99E-01 |
| rs548793          | g | 127341752 | MAPKAP1 | t      | c        | 16983   | -0.0631  | 0.0245   | 9.86E-03 | -----    | 1.85E-01 | 10350  | -0.0065  | 0.0303   | 8.29E-01 | ---      | 8.01E-01 | 27333   | -0.0401  | 0.0191   | 3.26E-02 | ++       | 1.46E-01 |
| rs509753          | g | 127343339 | MAPKAP1 | a      | g        | 18765   | -0.062   | 0.0241   | 1.02E-02 | -----    | 2.17E-01 | 10350  | -0.0073  | 0.0303   | 8.11E-01 | ---      | 8.09E-01 | 29115   | -0.0408  | 0.0189   | 3.05E-02 | ++       | 1.58E-01 |
| rs490234          | g | 127343555 | MAPKAP1 | t      | c        | 16431   | 0.0525   | 0.026    | 4.35E-02 | +++++    | 2.26E-01 | 10350  | 0.0087   | 0.0303   | 7.74E-01 | ++       | 8.24E-01 | 26781   | 0.0309   | 0.0197   | 8.56E-02 | ++       | 2.73E-01 |
| rs569408          | g | 127344645 | MAPKAP1 | a      | g        | 18765   | -0.0625  | 0.0241   | 9.66E-03 | -----    | 2.29E-01 | 10350  | -0.0094  | 0.0303   | 7.56E-01 | ---      | 8.32E-01 | 29115   | -0.0419  | 0.0189   | 2.62E-02 | ++       | 1.70E-01 |
| rs536861          | g | 127353265 | MAPKAP1 | a      | c        | 18766   | 0.0618   | 0.0241   | 1.05E-02 | +++++    | 2.31E-01 | 10350  | 0.0094   | 0.0303   | 7.56E-01 | ++       | 8.32E-01 | 29116   | 0.0415   | 0.0189   | 2.78E-02 | ++       | 1.76E-01 |
| rs521119          | g | 127354215 | MAPKAP1 | t      | c        | 18766   | 0.0617   | 0.0241   | 1.06E-02 | +++++    | 2.28E-01 | 10350  | 0.0116   | 0.0303   | 7.03E-01 | ++       | 8.54E-01 | 29116   | 0.0423   | 0.0189   | 2.50E-02 | ++       | 1.96E-01 |
| rs497531          | g | 127354885 | MAPKAP1 | a      | g        | 18766   | 0.0621   | 0.0241   | 1.01E-02 | +++++    | 2.32E-01 | 10351  | 0.0116   | 0.0303   | 7.04E-01 | ++       | 8.89E-01 | 29116   | 0.0442   | 0.0189   | 2.61E-02 | ++       | 1.78E-01 |
| rs506874          | g | 127358887 | MAPKAP1 | a      | g        | 18764   | -0.0612  | 0.0241   | 1.12E-02 | -----    | 2.41E-01 | 10340  | -0.0132  | 0.0303   | 6.64E-01 | ---      | 8.13E-01 | 29104   | -0.0429  | 0.0189   | 2.39E-02 | ++       | 2.15E-01 |
| rs562004          | g | 127361592 | MAPKAP1 | t      | c        | 18771   | 0.0666   | 0.0242   | 5.88E-03 | +++++    | 2.45E-01 | 10342  | 0.0119   | 0.0303   | 6.95E-01 | ++       | 7.93E-01 | 29113   | 0.0453   | 0.0189   | 1.66E-02 | ++       | 1.58E-01 |
| rs530628          | g | 127365755 | MAPKAP1 | c      | g        | 18763   | -0.0964  | 0.0242   | 6.88E-05 | -----    | 9.96E-01 | 10354  | -0.0157  | 0.0303   | 6.04E-01 | 0        | 7.06E-01 | 29117   | -0.0618  | 0.0189   | 5.91E-04 | ++       | 3.74E-02 |
| rs517064          | g | 127388807 | MAPKAP1 | t      | c        | 18784   | -0.0684  | 0.0242   | 4.73E-03 | -----    | 2.16E-01 | 10360  | -0.0181  | 0.0303   | 5.51E-01 | ---      | 7.00E-01 | 29144   | -0.0488  | 0.0189   | 9.84E-03 | ++       | 1.95E-01 |
| rs490333          | g | 127394390 | MAPKAP1 | t      | c        | 18801   | 0.0677   | 0.0242   | 5.15E-03 | +++++    | 2.17E-01 | 10361  | 0.0201   | 0.0305   | 5.09E-01 | ++       | 7.07E-01 | 29162   | 0.0493   | 0.0191   | 9.29E-03 | ++       | 2.22E-01 |
| <b>rs476819</b>   | g | 127402558 | MAPKAP1 | a      | g        | 18717   | 0.1021   | 0.0243   | 2.71E-05 | +++++    | 9.95E-01 | 10360  | 0.0174   | 0.0304   | 5.67E-01 | 0        | 6.60E-01 | 29077   | 0.0691   | 0.019    | 2.73E-04 | ++       | 2.97E-02 |
| rs534234          | g | 127409045 | MAPKAP1 | a      | g        | 18772   | -0.0995  | 0.0243   | 4.24E-05 | -----    | 9.93E-01 | 10358  | -0.0164  | 0.0304   | 5.89E-01 | 0        | 6.91E-01 | 29130   | -0.0671  | 0.019    | 4.07E-04 | ++       | 3.25E-02 |
| rs542974          | g | 127413039 | MAPKAP1 | a      | g        | 18731   | -0.0673  | 0.0244   | 5.72E-03 | -----    | 2.30E-01 | 10356  | -0.0165  | 0.0304   | 5.86E-01 | 0        | 6.88E-01 | 29087   | -0.0474  | 0.019    | 1.28E-02 | ++       | 1.93E-01 |
| rs2829312         | g | 127417694 | MAPKAP1 | t      | c        | 18563   | 0.0966   | 0.0244   | 7.36E-05 | +++++    | 9.95E-01 | 10352  | 0.0178   | 0.0304   | 5.57E-01 | ++       | 7.02E-01 | 28915   | 0.0657   | 0.019    | 5.52E-04 | ++       | 4.32E-02 |
| rs1259356         | g | 127428812 | MAPKAP1 | c      | g        | 18728   | -0.0673  | 0.0244   | 5.78E-03 | -----    | 2.25E-01 | 10354  | -0.0157  | 0.0304   | 6.05E-01 | 0        | 7.07E-01 | 29142   | -0.0471  | 0.019    | 1.24E-02 | ++       | 1.94E-01 |
| rs8176748         | g | 135121110 | ABO     | t      | c        | 4686    | -0.0791  | 0.0491   | 1.07E-01 | ??-???   | 2.40E-01 | 7851   | -0.0257  | 0.0683   | 7.07E-01 | ?        | 4.79E-01 | 12537   | -0.0609  | 0.0399   | 1.27E-01 | ++       | 5.26E-01 |
| rs8176740         | g | 135121293 | ABO     | a      | t        | 16875   | 0.0948   | 0.0267   | 3.79E-04 | +++++    | 2.90E-01 | 10293  | 0.0096   | 0.0461   | 8.35E-01 | ++       | 7.69E-01 | 27168   | 0.0734   | 0.0231   | 1.49E-03 | ++       | 1.10E-01 |
| rs8176732         | g | 135122124 | ABO     | a      | g        | 16436   | 0.1088   | 0.0281   | 1.07E-04 | +++++    | 6.37E-01 | 10348  | 0.0212   | 0.0519   | 6.83E-01 | ++       | 7.82E-01 | 26784   | 0.0808   | 0.0247   | 3.19E-03 | ++       | 1.38E-01 |
| rs8176728         | g | 135122382 | ABO     | a      | g        | 18760   | -0.0914  | 0.0261   | 4.65E-04 | -----    | 4.48E-01 | 10348  | 0.0067   | 0.0341   | 8.98E-01 | ++       | 8.80E-01 | 29108   | -0.0552  | 0.0207   | 7.78E-04 | ++       | 2.23E-02 |
| rs8176717         | g | 135122855 | ABO     | g      | g        | 16469   | -0.1079  | 0.028    | 1.16E-04 | -----    | 6.12E-01 | 10354  | 0.0137   | 0.0331   | 6.78E-01 | ++       | 8.75E-01 | 26823   | -0.0572  | 0.0214   | 7.48E-03 | ++       | 5.04E-03 |
| rs8176714         | g | 135122999 | ABO     | a      | g        | 14780   | -0.0795  | 0.0285   | 5.26E-03 | -----    | 5.27E-01 | 10249  | 0.0228   | 0.0331   | 4.91E-01 | ++       | 9.00E-01 | 25029   | -0.0359  | 0.0216   | 9.60E-02 | ++       | 1.92E-02 |
| rs512770          | g | 135123227 | ABO     | a      | g        | 17028   | -0.0923  | 0.0265   | 5.02E-04 | -----    | 3.70E-01 | 10350  | 0.0147   | 0.0331   | 6.57E-01 | ++       | 8.60E-01 | 27378   | -0.0505  | 0.0207   | 1.46E-02 | ++       | 1.16E-02 |
| rs641959          | g | 135123520 | ABO     | a      | c        | 18654   | 0.0828   | 0.0259   | 1.40E-03 | +++++    | 3.95E-01 | 10355  | -0.014   | 0.033    | 6.71E-01 | ---      | 6.79E-01 | 29009   | 0.0459   | 0.0204   | 2.43E-02 | ++       | 2.10E-02 |
| rs641943          | g | 135123535 | ABO     | a      | g        | 18746   | 0.0842   | 0.0259   | 1.14E-03 | +++++    | 3.69E-01 | 10347  | 0.0134   | 0.033    | 6.94E-01 | ++       | 8.45E-01 | 29093   | 0.047    | 0.0203   | 4.41E-02 | ++       | 2.15E-02 |
| rs514708          | g | 135123564 | ABO     | a      | g        | 18771   | -0.0831  | 0.0258   | 1.28E-03 | -----    | 3.86E-01 | 10355  | 0.0146   | 0.033    | 6.94E-01 | ++       | 8.89E-01 | 29126   | 0.046    | 0.0203   | 2.35E-02 | ++       | 1.97E-02 |
| rs517414          | g | 135123855 | ABO     | a      | g        | 18807   | -0.0     |          |          |          |          |        |          |          |          |          |          |         |          |          |          |          |          |

|            |           |   |   |       |         |        |          |       |          |       |         |        |          |   |          |       |         |        |          |    |          |
|------------|-----------|---|---|-------|---------|--------|----------|-------|----------|-------|---------|--------|----------|---|----------|-------|---------|--------|----------|----|----------|
| rs12257919 | 10314043  | t | c | 18813 | 0.1739  | 0.0604 | 3.99e-03 | +++++ | 8.95e-02 | 2876  | 0.0255  | 0.132  | 8.47e-01 | + | 1.18e-01 | 21689 | 0.1482  | 0.0549 | 6.97e-03 | ++ | 3.07e-01 |
| rs10795772 | 10314212  | t | c | 16436 | 0.2451  | 0.0674 | 2.74e-04 | +++++ | 1.87e-01 | 10343 | 0.0865  | 0.0985 | 3.80e-01 | + | 7.71e-01 | 26779 | 0.1945  | 0.0556 | 4.70e-04 | ++ | 1.84e-01 |
| rs10752191 | 10314293  | a | g | 18808 | 0.1925  | 0.0604 | 1.44e-03 | +++++ | 2.59e-01 | 2876  | 0.0255  | 0.132  | 8.47e-01 | + | 1.18e-01 | 21684 | 0.1364  | 0.0549 | 2.90e-03 | ++ | 2.50e-01 |
| rs12268979 | 10314792  | t | g | 16475 | -0.2268 | 0.0664 | 6.40e-04 | ----- | 2.27e-01 | 2876  | -0.0255 | 0.132  | 8.47e-01 | + | 1.18e-01 | 19351 | -0.1861 | 0.0593 | 1.70e-03 | -- | 1.73e-01 |
| rs15712106 | 10315126  | t | c | 18812 | -0.1496 | 0.0616 | 2.27e-02 | ----- | 1.04e-01 | 10363 | -0.0787 | 0.0706 | 2.65e-01 | + | 2.63e-01 | 22969 | -0.1189 | 0.0457 | 8.75e-03 | -- | 4.46e-01 |
| rs15712123 | 10315940  | c | g | 18697 | -0.1781 | 0.0616 | 8.85e-03 | ----- | 2.29e-01 | 2872  | -0.023  | 0.132  | 8.62e-01 | + | 1.19e-01 | 21569 | -0.1504 | 0.0555 | 7.07e-03 | -- | 2.87e-01 |
| rs15721222 | 10315987  | c | g | 14270 | -0.2324 | 0.0691 | 7.70e-04 | ----- | 2.79e-01 | 2807  | -0.0133 | 0.1344 | 9.21e-01 | + | 6.32e-02 | 17077 | -0.1866 | 0.0615 | 2.40e-03 | -- | 1.47e-01 |
| rs15721241 | 10316052  | c | g | 12324 | 0.1957  | 0.0811 | 1.58e-02 | +++++ | 2.18e-01 | 10294 | 0.0725  | 0.0696 | 2.98e-01 | + | 1.94e-01 | 22618 | 0.1248  | 0.0528 | 1.82e-02 | ++ | 2.49e-01 |
| rs1333831  | 10318009  | c | g | 6508  | 0.1237  | 0.1148 | 2.81e-01 | ????+ | 5.39e-01 | 10241 | 0.0814  | 0.071  | 2.51e-01 | + | 2.86e-01 | 16749 | 0.0931  | 0.0604 | 1.23e-01 | ++ | 7.54e-01 |
| rs914987   | 10318853  | c | g | 18804 | -0.187  | 0.0598 | 1.77e-03 | ----- | 1.96e-01 | 10360 | -0.0885 | 0.0707 | 2.11e-01 | + | 4.92e-01 | 29164 | -0.1459 | 0.0457 | 1.39e-03 | -- | 2.88e-01 |
| rs2895065  | 10320197  | a | g | 18811 | -0.1859 | 0.0598 | 1.87e-03 | ----- | 2.02e-01 | 2873  | -0.0272 | 0.131  | 8.36e-01 | + | 1.22e-01 | 21684 | -0.1585 | 0.0544 | 3.57e-03 | -- | 2.70e-01 |
| rs7905941  | 10320355  | c | g | 18810 | -0.1809 | 0.0602 | 2.65e-03 | ----- | 1.51e-01 | 2875  | -0.0263 | 0.132  | 8.42e-01 | + | 1.17e-01 | 21685 | -0.1543 | 0.0458 | 4.85e-03 | -- | 2.87e-01 |
| rs10905687 | 10322200  | c | g | 18666 | -0.1809 | 0.0602 | 2.66e-03 | ----- | 1.51e-01 | 10330 | -0.0882 | 0.071  | 2.14e-01 | + | 2.45e-01 | 28996 | -0.1421 | 0.0459 | 1.97e-03 | -- | 3.19e-01 |
| rs1333836  | 10323780  | a | c | 18810 | 0.1784  | 0.0602 | 3.06e-03 | +++++ | 1.66e-01 | 2876  | 0.034   | 0.1317 | 7.97e-01 | + | 1.13e-01 | 21686 | 0.1534  | 0.0548 | 5.07e-03 | ++ | 3.19e-01 |
| rs1333839  | 10324061  | a | c | 18811 | -0.1809 | 0.0602 | 7.52e-03 | ----- | 9.83e-01 | 10354 | -0.0938 | 0.083  | 1.84e-01 | + | 2.46e-01 | 29165 | -0.1327 | 0.0458 | 3.79e-03 | -- | 4.70e-01 |
| rs1215195  | 10324451  | c | g | 18672 | 0.1333  | 0.0633 | 3.52e-02 | +++++ | 1.67e-01 | 2844  | 0.0818  | 0.1325 | 5.37e-01 | + | 8.89e-02 | 21516 | 0.1237  | 0.0571 | 3.03e-02 | ++ | 7.26e-01 |
| rs7908732  | 10324519  | a | g | 18814 | -0.177  | 0.0604 | 3.38e-03 | ----- | 1.48e-01 | 2876  | -0.034  | 0.1317 | 7.97e-01 | + | 1.13e-01 | 21690 | -0.1521 | 0.0459 | 5.58e-03 | -- | 3.24e-01 |
| rs118702   | 10325126  | a | g | 18805 | -0.1808 | 0.0601 | 2.63e-03 | ----- | 1.75e-01 | 2873  | -0.0356 | 0.1317 | 7.87e-01 | + | 1.17e-01 | 21678 | -0.1558 | 0.0547 | 4.39e-03 | -- | 3.16e-01 |
| rs10795773 | 10326103  | c | g | 18809 | 0.1796  | 0.0603 | 2.90e-03 | +++++ | 1.59e-01 | 10363 | 0.0865  | 0.0709 | 2.23e-01 | + | 2.55e-01 | 29172 | 0.1405  | 0.0459 | 2.22e-03 | ++ | 3.17e-01 |
| rs10737038 | 10326509  | a | g | 18806 | -0.1787 | 0.0604 | 3.11e-03 | ----- | 1.57e-01 | 10363 | -0.0865 | 0.0709 | 2.23e-01 | + | 2.55e-01 | 29169 | -0.1399 | 0.0458 | 3.74e-03 | -- | 3.22e-01 |
| rs10795774 | 103268873 | a | g | 18664 | -0.1832 | 0.0602 | 2.34e-03 | ----- | 1.81e-01 | 2841  | -0.0405 | 0.1326 | 7.60e-01 | + | 1.10e-01 | 21505 | -0.1588 | 0.0548 | 3.76e-03 | -- | 3.27e-01 |
| rs10795775 | 10327100  | c | g | 18809 | -0.1825 | 0.0604 | 2.52e-03 | ----- | 1.76e-01 | 10363 | -0.0865 | 0.0709 | 2.23e-01 | + | 2.55e-01 | 29172 | -0.1421 | 0.046  | 1.99e-03 | -- | 3.03e-01 |
| rs7070799  | 10330746  | c | g | 18809 | 0.1811  | 0.0604 | 2.72e-03 | +++++ | 1.77e-01 | 10363 | 0.0865  | 0.0709 | 2.23e-01 | + | 2.55e-01 | 29172 | 0.1413  | 0.046  | 2.12e-03 | ++ | 3.10e-01 |
| rs7094706  | 10333573  | c | g | 16355 | 0.2367  | 0.0663 | 3.59e-04 | +++++ | 2.84e-01 | 10336 | 0.0835  | 0.071  | 2.29e-01 | + | 2.52e-01 | 26691 | 0.1453  | 0.0485 | 6.45e-04 | ++ | 1.15e-01 |
| rs1413288  | 10333888  | a | t | 14711 | 0.1467  | 0.0706 | 3.78e-02 | +++++ | 1.35e-01 | 10300 | 0.0832  | 0.105  | 2.45e-01 | + | 9.90e-01 | 24316 | 0.1384  | 0.0498 | 3.38e-04 | ++ | 1.66e-01 |
| rs10795779 | 10338427  | c | g | 18759 | 0.1747  | 0.0603 | 3.75e-03 | +++++ | 1.80e-01 | 10356 | 0.1116  | 0.0726 | 1.24e-01 | + | 9.32e-01 | 28712 | 0.1489  | 0.0464 | 1.32e-03 | ++ | 5.04e-01 |
| rs12156543 | 10339399  | a | g | 18782 | 0.1904  | 0.0595 | 1.37e-03 | +++++ | 1.17e-01 | 2488  | 0.1017  | 0.1412 | 4.72e-01 | + | 1.00e+00 | 21270 | 0.177   | 0.0548 | 1.24e-03 | ++ | 5.63e-01 |
| rs7088313  | 10339586  | c | g | 16447 | 0.2352  | 0.0652 | 3.11e-04 | +++++ | 1.90e-01 | 9975  | 0.1063  | 0.0723 | 1.42e-01 | + | 9.69e-01 | 26422 | 0.1774  | 0.0484 | 2.94e-04 | ++ | 1.86e-01 |
| rs7072070  | 10339716  | a | t | 18814 | 0.1894  | 0.0594 | 1.44e-03 | +++++ | 1.15e-01 | 9975  | 0.1063  | 0.0723 | 1.42e-01 | + | 9.69e-01 | 28789 | 0.1559  | 0.0459 | 6.81e-04 | ++ | 3.75e-01 |
| rs7087837  | 10339965  | c | g | 18814 | -0.1889 | 0.0594 | 1.48e-03 | ----- | 1.13e-01 | 2488  | -0.1017 | 0.1412 | 4.72e-01 | + | 1.00e+00 | 21302 | -0.1758 | 0.0548 | 1.33e-03 | -- | 5.69e-01 |
| rs12415061 | 10340635  | c | g | 18814 | 0.1887  | 0.0594 | 1.50e-03 | +++++ | 1.12e-01 | 2488  | 0.1017  | 0.1412 | 4.72e-01 | + | 1.00e+00 | 21302 | 0.1756  | 0.0548 | 1.34e-03 | ++ | 5.70e-01 |
| rs9888040  | 10341486  | a | c | 18807 | -0.1858 | 0.059  | 1.64e-03 | ----- | 1.06e-01 | 2485  | -0.0917 | 0.1415 | 5.17e-01 | + | 1.00e+00 | 21292 | -0.1719 | 0.0545 | 1.60e-03 | -- | 5.39e-01 |
| rs10795780 | 10341894  | c | g | 16479 | 0.2339  | 0.0653 | 3.38e-04 | +++++ | 1.83e-01 | 9975  | 0.1063  | 0.0723 | 1.42e-01 | + | 9.69e-01 | 26454 | 0.1766  | 0.0485 | 2.69e-04 | ++ | 1.90e-01 |
| rs10905699 | 10342670  | c | g | 18814 | -0.1884 | 0.0594 | 1.53e-03 | ----- | 1.12e-01 | 9975  | -0.1063 | 0.0723 | 1.42e-01 | + | 9.69e-01 | 28789 | -0.1553 | 0.0459 | 7.14e-04 | -- | 3.80e-01 |
| rs2895067  | 10342872  | c | g | 18813 | 0.1764  | 0.0629 | 2.89e-03 | +++++ | 1.11e-01 | 2487  | 0.1115  | 0.141  | 4.29e-01 | + | 1.00e+00 | 21300 | 0.1667  | 0.0546 | 2.26e-03 | ++ | 6.71e-01 |
| rs2398212  | 10343086  | a | g | 18812 | -0.1869 | 0.0592 | 1.60e-03 | ----- | 1.20e-01 | 9975  | -0.1063 | 0.0723 | 1.42e-01 | + | 9.69e-01 | 28787 | -0.1546 | 0.0458 | 7.40e-04 | -- | 3.84e-01 |
| rs2398213  | 10343219  | a | g | 18813 | 0.1878  | 0.0594 | 1.58e-03 | +++++ | 1.05e-01 | 9975  | 0.1063  | 0.0723 | 1.42e-01 | + | 9.69e-01 | 28788 | 0.1545  | 0.0459 | 7.35e-04 | ++ | 3.88e-01 |
| rs10795782 | 10343902  | c | g | 16783 | 0.1975  | 0.0617 | 1.37e-03 | +++++ | 7.27e-02 | 9975  | 0.1063  | 0.0723 | 1.42e-01 | + | 9.69e-01 | 26758 | 0.1591  | 0.0469 | 7.01e-04 | ++ | 3.37e-01 |
| rs10795783 | 10343953  | a | c | 18762 | 0.1772  | 0.0599 | 3.10e-03 | +++++ | 5.74e-02 | 2486  | 0.1196  | 0.1419 | 4.00e-01 | + | 1.00e+00 | 21248 | 0.1685  | 0.0552 | 2.26e-03 | ++ | 7.08e-01 |
| rs2065592  | 10344157  | a | g | 16478 | -0.2325 | 0.0652 | 3.63e-04 | ----- | 1.63e-01 | 2488  | -0.1017 | 0.1412 | 4.72e-01 | + | 1.00e+00 | 18966 | -0.2095 | 0.0592 | 4.01e-04 | -- | 4.00e-01 |
| rs2065591  | 10344203  | c | g | 16479 | -0.2315 | 0.0652 | 3.88e-04 | ----- | 1.48e-01 | 2488  | -0.1017 | 0.1412 | 4.72e-01 | + | 1.00e+00 | 18967 | -0.2089 | 0.0592 | 4.32e-04 | -- | 4.04e-01 |
| rs10082491 | 10344424  | a | g | 18809 | 0.182   | 0.0598 | 2.35e-03 | +++++ | 7.60e-02 | 9975  | 0.1063  | 0.0723 | 1.42e-01 | + | 9.69e-01 | 28784 | 0.1512  | 0.0461 | 1.03e-03 | ++ | 4.20e-01 |
| rs1215193  | 10344583  | c | t | 14448 | 0.248   | 0.0683 | 2.84e-04 | +++++ | 1.10e-01 | 9975  | 0.1063  | 0.0723 | 1.42e-01 | + | 9.69e-01 | 24423 | 0.1812  | 0.0496 | 2.63e-04 | ++ | 1.54e-01 |
| rs7923025  | 10345106  | a | t | 18807 | -0.1837 | 0.0591 | 1.38e-03 | ----- | 8.74e-02 | 9972  | -0.103  | 0.0722 | 1.54e-01 | + | 9.26e-02 | 28779 | -0.1513 | 0.0457 | 9.37e-04 | -- | 3.87e-01 |
| rs10085700 | 10345227  | c | g | 14369 | 0.2436  | 0.0685 | 8.80e-04 | +++++ | 1.14e-01 | 9947  | 0.105   | 0.0724 | 1.45e-01 | + | 9.90e-01 | 24316 | 0.1384  | 0.0498 | 3.38e-04 | ++ | 1.66e-01 |
| rs10950702 | 10345647  | c | g | 18777 | 0.1839  | 0.0596 | 2.02e-03 | +++++ | 8.46e-02 | 2488  | 0.1017  | 0.1412 | 4.72e-01 | + | 1.00e+00 | 21265 | 0.1715  | 0.0549 | 1.79e-03 | ++ | 5.92e-01 |
| rs1333833  | 10347524  | c | t | 14999 | 0.2001  | 0.0621 | 1.27e-03 | +++++ | 6.83e-02 | 9975  | 0.1041  | 0.0723 | 1.50e-01 | + | 9.84e-01 | 24974 | 0.1593  | 0.0471 | 7.18e-04 | ++ | 3.14e-01 |
| rs10466299 | 10349810  | a | g | 16476 | -0.2226 | 0.0658 | 7.24e-04 | ----- | 1.31e-01 | 2488  | -0.1017 | 0.1412 | 4.72e-01 | + | 1.00e+00 | 18964 | -0.201  | 0.0596 | 7.50e-04 | -- | 4.38e-01 |
| rs10795784 | 10349980  | c | g | 18804 | 0.1776  | 0.0599 | 3.01e-03 | +++++ | 7.96e-02 | 2488  | 0.1017  | 0.1412 | 4.72e-01 | + | 1.00e+00 | 21292 | 0.166   | 0.0551 | 2.61e-03 | ++ | 6.21e-01 |
| rs10458816 | 10350267  | c | g | 18814 | 0.1808  | 0.0601 | 2.62e-03 | +++++ | 7.02e-02 | 9969  | 0.1103  | 0.0726 | 1.29e-01 | + | 9.32e-01 | 28783 | 0.1521  | 0.0463 | 1.02e-03 | ++ | 5.44e-01 |
| rs10458804 | 10350286  | a | g | 18817 | 0.1747  | 0.0601 | 3.64e-03 | +++++ | 6.60e-02 | 2487  | 0.0926  | 0.1415 | 5.13e-01 | + | 1.00e+00 | 21304 | 0.1622  | 0.0553 | 3.98e-03 | ++ | 5.93e-01 |
| rs10458805 | 10350325  | a | g | 18817 | 0.18    | 0.06   | 2.70e-03 | +++++ | 7.46e-02 | 9975  | 0.1115  | 0.0726 | 1.25e-01 | + | 9.35e-01 | 28792 | 0.1522  | 0.0462 | 9.99e-04 | ++ | 4.67e-01 |
| rs10458817 | 10350358  | c | t | 18803 | -0.1748 | 0.0602 | 3.70e-03 | ----- | 5.20e-02 | 9960  | -0.1138 | 0.0732 | 1.20e-01 | + | 9.86e-01 | 28763 | -0.1502 | 0.0465 | 1.27e-03 | -- | 5.20e-01 |
| rs10458818 | 10350370  | c | g | 17032 | 0.1936  | 0.0603 | 1.       |       |          |       |         |        |          |   |          |       |         |        |          |    |          |

|            |            |      |   |       |         |         |          |          |          |          |         |         |          |          |          |          |         |         |          |          |          |          |
|------------|------------|------|---|-------|---------|---------|----------|----------|----------|----------|---------|---------|----------|----------|----------|----------|---------|---------|----------|----------|----------|----------|
| rs7898493  | 0.94285296 | IDE  | c | g     | 18695   | 0.1614  | 0.0406   | 7.08E-05 | +++++    | 7.34E-01 | 10342   | 0.1252  | 0.0583   | 3.17E-02 | +++      | 2.56E-01 | 29037   | 0.1496  | 0.0333   | 7.14E-06 | ++       | 6.10E-01 |
| rs1187061  | 0.94295389 | IDE  | t | c     | 18461   | 0.1659  | 0.04     | 3.41E-05 | +++++    | 8.46E-01 | 10241   | 0.1201  | 0.0581   | 3.86E-02 | +++      | 1.24E-01 | 28702   | 0.1512  | 0.0329   | 4.47E-06 | ++       | 5.16E-01 |
| rs2421943  | 0.94301795 | IDE  | a | g     | 18746   | -0.1228 | 0.024    | 3.21E-07 | +++++    | 9.71E-01 | 7870    | -0.0262 | 0.0344   | 4.46E-01 | -?       | 4.35E-01 | 26616   | -0.0919 | 0.0192   | 9.37E-06 | ++       | 2.13E-02 |
| rs7908111  | 0.94304784 | IDE  | a | g     | 18795   | 0.1573  | 0.0399   | 8.09E-05 | +++++    | 8.09E-01 | 10353   | 0.1302  | 0.0581   | 2.52E-02 | +++      | 1.27E-01 | 29148   | 0.1486  | 0.0329   | 6.23E-06 | ++       | 7.01E-01 |
| rs11470442 | 0.94306045 | IDE  | c | g     | 14832   | 0.1604  | 0.0442   | 2.82E-04 | +++++    | 7.16E-01 | 10361   | 0.1235  | 0.058    | 3.32E-02 | +++      | 1.20E-01 | 25193   | 0.1468  | 0.0352   | 2.95E-05 | ++       | 6.13E-01 |
| rs1187078  | 0.94306865 |      | t | c     | 8843    | 0.0933  | 0.0377   | 3.0E-02  | ????     | 7.39E-01 | 7849    | 0.0235  | 0.0348   | 3.50E-01 | +        | 4.05E-01 | 16687   | 0.0606  | 0.0255   | 1.78E-02 | ++       | 2.35E-01 |
| rs8583823  | 0.94343495 |      | t | c     | 18522   | -0.0946 | 0.0254   | 2.01E-04 | +++++    | 9.82E-01 | 7866    | -0.0515 | 0.0348   | 1.39E-01 | -?       | 4.95E-01 | 26388   | -0.0796 | 0.0205   | 1.04E-04 | ++       | 3.17E-01 |
| rs2421941  | 0.94345889 |      | a | g     | 16384   | -0.1612 | 0.0437   | 2.29E-04 | +++++    | 7.94E-01 | 10329   | -0.0004 | 0.0597   | 9.95E-01 | +        | 1.99E-03 | 26713   | -0.1051 | 0.0353   | 2.88E-03 | ++       | 2.98E-02 |
| rs8583826  | 0.94337810 |      | g | 18683 | -0.1451 | 0.0276  | 1.41E-07 | +++++    | 2.12E-01 | 10314    | -0.0557 | 0.0381  | 1.44E-01 | +        | 1.61E-01 | 28997    | -0.1143 | 0.0224  | 3.14E-07 | ++       | 5.74E-02 |          |
| rs1187083  | 0.94342485 | KF11 | a | t     | 18703   | -0.1417 | 0.0366   | 1.08E-04 | +++++    | 6.68E-01 | 10360   | -0.0858 | 0.0554   | 1.22E-01 | ---      | 4.31E-01 | 29063   | -0.1247 | 0.0303   | 4.03E-05 | ++       | 4.00E-01 |
| rs1187084  | 0.94342998 | KF11 | t | c     | 18692   | 0.1895  | 0.0494   | 1.26E-04 | +++++    | 6.89E-01 | 10347   | 0.2206  | 0.0874   | 1.16E-02 | +++      | 3.03E-01 | 29039   | 0.1977  | 0.043    | 4.62E-05 | ++       | 5.75E-01 |
| rs11818332 | 0.94343418 | KF11 | t | c     | 18810   | -0.1446 | 0.0366   | 7.90E-05 | +++++    | 6.45E-01 | 10363   | -0.1081 | 0.0541   | 4.59E-02 | +++      | 6.14E-01 | 29173   | -0.1331 | 0.0303   | 1.12E-05 | ++       | 5.57E-01 |
| rs3781236  | 0.94343843 | KF11 | a | g     | 18810   | -0.1441 | 0.0366   | 8.36E-05 | +++++    | 6.44E-01 | 10363   | -0.1192 | 0.0543   | 2.81E-02 | +++      | 7.03E-01 | 29173   | -0.1363 | 0.0303   | 7.07E-06 | ++       | 7.04E-01 |
| rs3844745  | 0.94344184 | KF11 | t | c     | 18813   | 0.1367  | 0.0269   | 3.71E-07 | +++++    | 9.17E-01 | 7863    | 0.0166  | 0.0342   | 5.35E-02 | ++       | 4.50E-01 | 22676   | 0.1097  | 0.0211   | 2.13E-07 | ++       | 1.04E-01 |
| rs4604797  | 0.94348292 | KF11 | a | g     | 18707   | 0.1425  | 0.031    | 1.25E-04 | +++++    | 5.31E-01 | 10363   | 0.0263  | 0.0581   | 4.58E-02 | +++      | 6.14E-01 | 27390   | 0.1311  | 0.0306   | 1.73E-05 | ++       | 5.99E-01 |
| rs7107758  | 0.94357013 | KF11 | a | g     | 18810   | -0.1437 | 0.0366   | 8.82E-05 | +++++    | 6.47E-01 | 10363   | -0.1089 | 0.0543   | 4.48E-02 | +++      | 6.20E-01 | 29173   | -0.1328 | 0.0303   | 1.21E-05 | ++       | 5.95E-01 |
| rs10786500 | 0.94357210 | KF11 | a | g     | 16347   | 0.1649  | 0.0433   | 1.40E-04 | +++++    | 8.30E-01 | 10353   | -0.0015 | 0.0594   | 9.80E-01 | +++      | 1.80E-03 | 26790   | 0.1072  | 0.035    | 2.19E-03 | ++       | 2.36E-02 |
| rs12261518 | 0.94357897 | KF11 | a | g     | 18700   | -0.1914 | 0.0493   | 1.05E-04 | +++++    | 6.73E-01 | 10348   | -0.2228 | 0.0741   | 2.63E-03 | ---      | 3.87E-01 | 29048   | -0.201  | 0.041    | 9.69E-07 | ++       | 7.24E-01 |
| rs1187094  | 0.94358158 | KF11 | a | g     | 14821   | -0.1125 | 0.0262   | 1.74E-05 | +++++    | 9.64E-01 | 7465    | -0.047  | 0.0341   | 1.68E-01 | ??       | 1.00E+00 | 22286   | -0.0882 | 0.0208   | 2.19E-05 | ++       | 1.28E-01 |
| rs1187096  | 0.94359568 | KF11 | t | c     | 18635   | -0.1377 | 0.0241   | 1.17E-08 | +++++    | 6.60E-01 | 7875    | -0.0476 | 0.0344   | 1.66E-01 | -?       | 2.87E-01 | 26510   | -0.108  | 0.0197   | 4.41E-08 | ++       | 3.19E-02 |
| rs10882091 | 0.94364357 | KF11 | t | c     | 18816   | -0.1492 | 0.0413   | 3.05E-04 | +++++    | 6.53E-01 | 10362   | -0.0005 | 0.0595   | 9.94E-01 | +        | 1.42E-03 | 29178   | -0.1009 | 0.0339   | 2.95E-03 | ++       | 4.01E-02 |
| rs12260688 | 0.94369694 | KF11 | t | c     | 18817   | 0.1435  | 0.0366   | 8.80E-05 | +++++    | 6.43E-01 | 10361   | 0.1156  | 0.0545   | 3.39E-02 | +++      | 6.73E-01 | 29178   | 0.1348  | 0.0304   | 9.10E-06 | ++       | 6.71E-01 |
| rs93714814 | 0.94372930 | KF11 | t | c     | 18814   | 0.1493  | 0.0413   | 2.97E-04 | +++++    | 6.56E-01 | 10363   | -0.0016 | 0.0596   | 9.78E-01 | +++      | 1.43E-03 | 29180   | 0.1303  | 0.0339   | 3.12E-03 | ++       | 3.74E-02 |
| rs78959056 | 0.94372946 | KF11 | a | g     | 18815   | 0.1445  | 0.0366   | 7.69E-05 | +++++    | 6.37E-01 | 10363   | 0.0742  | 0.0529   | 1.85E-01 | +++      | 3.37E-01 | 29178   | 0.1234  | 0.0306   | 5.57E-05 | ++       | 2.95E-01 |
| rs7073868  | 0.94373424 | KF11 | t | c     | 18700   | 0.1896  | 0.0494   | 1.22E-04 | +++++    | 6.84E-01 | 10348   | 0.2118  | 0.078    | 1.27E-02 | ---      | 2.55E-01 | 29048   | 0.1952  | 0.0426   | 4.72E-06 | ++       | 8.21E-01 |
| rs7087860  | 0.94376134 | KF11 | a | g     | 18815   | -0.1444 | 0.0366   | 7.78E-05 | +++++    | 6.40E-01 | 10363   | -0.1203 | 0.0524   | 2.18E-02 | ---      | 7.20E-01 | 29178   | -0.1365 | 0.03     | 5.39E-06 | ++       | 7.06E-01 |
| rs10882094 | 0.94376556 | KF11 | a | g     | 18817   | -0.1488 | 0.0413   | 3.17E-04 | +++++    | 6.56E-01 | 10363   | -0.0005 | 0.0595   | 9.94E-01 | +        | 1.42E-03 | 29180   | -0.1006 | 0.0339   | 3.03E-03 | ++       | 4.06E-02 |
| rs10717664 | 0.94382439 | KF11 | a | t     | 18815   | -0.1445 | 0.0366   | 7.70E-05 | +++++    | 6.40E-01 | 10363   | -0.0948 | 0.0531   | 7.43E-02 | ---      | 5.12E-01 | 29178   | -0.1285 | 0.0301   | 2.01E-05 | ++       | 4.41E-01 |
| rs11818705 | 0.94382708 | KF11 | t | c     | 18814   | 0.1449  | 0.0366   | 7.39E-05 | +++++    | 6.45E-01 | 10358   | 0.117   | 0.0519   | 2.41E-02 | +++      | 6.97E-01 | 29172   | 0.1356  | 0.0299   | 5.77E-06 | ++       | 6.60E-01 |
| rs11818708 | 0.94382761 | KF11 | c | 18815 | -0.1446 | 0.0366  | 7.67E-05 | +++++    | 6.39E-01 | 10363    | -0.1236 | 0.0524  | 1.84E-02 | ---      | 7.45E-01 | 29178    | -0.1377 | 0.03    | 4.44E-06 | ++       | 7.43E-01 |          |
| rs11818750 | 0.94382810 | KF11 | t | c     | 16610   | 0.152   | 0.0392   | 1.06E-04 | +++++    | 7.26E-01 | 10327   | 0.1271  | 0.0517   | 1.40E-02 | +++      | 6.47E-01 | 26937   | 0.1429  | 0.0312   | 4.76E-06 | ++       | 5.01E-01 |
| rs11819351 | 0.94384310 | KF11 | t | c     | 18518   | 0.1377  | 0.0383   | 3.24E-04 | +++++    | 6.13E-01 | 10361   | 0.0952  | 0.0555   | 8.65E-02 | +++      | 5.54E-01 | 28879   | 0.124   | 0.0315   | 8.83E-05 | ++       | 7.29E-01 |
| rs10882095 | 0.94384382 | KF11 | t | c     | 16308   | 0.1489  | 0.026    | 1.10E-08 | +++++    | 9.91E-01 | 7875    | 0.057   | 0.0343   | 9.61E-02 | ++       | 3.18E-01 | 29183   | 0.1154  | 0.0207   | 2.58E-08 | ++       | 3.28E-02 |
| rs7079990  | 0.94384580 | KF11 | t | c     | 18781   | 0.1216  | 0.0332   | 2.50E-04 | +++++    | 6.93E-01 | 10362   | 0.0459  | 0.0483   | 3.43E-01 | +++      | 7.71E-01 | 29143   | 0.0973  | 0.0274   | 3.76E-04 | ++       | 1.97E-02 |
| rs10736069 | 0.94385373 | KF11 | t | c     | 18513   | 0.1467  | 0.0414   | 3.91E-04 | +++++    | 6.84E-01 | 10348   | 0.2118  | 0.078    | 1.27E-02 | ---      | 4.36E-01 | 29048   | 0.1952  | 0.0426   | 4.72E-06 | ++       | 8.21E-01 |
| rs7906089  | 0.94385728 | KF11 | a | g     | 18813   | 0.1496  | 0.0413   | 2.95E-04 | +++++    | 6.47E-01 | 10356   | 0.0013  | 0.0594   | 9.83E-01 | +++      | 1.56E-03 | 29169   | 0.1013  | 0.0339   | 2.82E-03 | ++       | 4.04E-02 |
| rs7096980  | 0.94387741 | KF11 | a | t     | 16367   | 0.2001  | 0.0517   | 1.09E-04 | +++++    | 5.61E-01 | 10348   | 0.2124  | 0.0836   | 1.11E-02 | +++      | 2.86E-01 | 26715   | 0.2035  | 0.044    | 3.69E-06 | ++       | 9.00E-01 |
| rs6583830  | 0.94388098 | KF11 | a | g     | 18812   | 0.1512  | 0.0413   | 2.52E-04 | +++++    | 7.06E-01 | 10356   | 0.0013  | 0.0594   | 9.83E-01 | +++      | 1.56E-03 | 29168   | 0.1024  | 0.0339   | 2.54E-03 | ++       | 3.83E-02 |
| rs7079583  | 0.94391873 | KF11 | c | 18782 | -0.1194 | 0.0336  | 3.72E-04 | +++++    | 2.47E-01 | 10362    | -0.0459 | 0.0484  | 3.43E-01 | ---      | 7.71E-01 | 29144    | -0.0955 | 0.0276  | 5.40E-03 | ++       | 1.21E-01 |          |
| rs7079602  | 0.94391950 | KF11 | a | g     | 18702   | -0.1905 | 0.0494   | 1.13E-04 | +++++    | 6.19E-01 | 10348   | -0.2091 | 0.0847   | 1.35E-02 | ---      | 2.65E-01 | 29050   | -0.1955 | 0.0427   | 4.77E-06 | ++       | 8.50E-01 |
| rs7088685  | 0.94393578 | KF11 | a | t     | 18814   | -0.1436 | 0.0366   | 8.85E-05 | +++++    | 6.23E-01 | 10322   | -0.1041 | 0.0546   | 5.65E-02 | ---      | 2.60E-01 | 29136   | -0.1314 | 0.0304   | 1.56E-05 | ++       | 5.48E-01 |
| rs7902436  | 0.94394677 | KF11 | a | t     | 17034   | 0.1443  | 0.0371   | 9.84E-05 | +++++    | 5.21E-01 | 10363   | 0.0859  | 0.0529   | 1.05E-01 | +++      | 4.80E-01 | 27397   | 0.125   | 0.0304   | 3.84E-05 | ++       | 3.66E-01 |
| rs7917359  | 0.94394804 | KF11 | t | c     | 18816   | 0.1449  | 0.0366   | 7.51E-05 | +++++    | 5.96E-01 | 10265   | 0.1307  | 0.0531   | 1.38E-02 | +++      | 4.16E-01 | 29081   | 0.1403  | 0.0301   | 3.22E-06 | ++       | 8.26E-01 |
| rs1118714  | 0.94395021 | KF11 | t | c     | 16301   | 0.1488  | 0.0261   | 1.15E-08 | +++++    | 9.93E-01 | 7875    | 0.0712  | 0.0342   | 3.72E-02 | ++       | 3.67E-01 | 29176   | 0.1202  | 0.0207   | 6.83E-09 | ++       | 4.52E-02 |
| rs12264712 | 0.94395382 | KF11 | t | c     | 18703   | 0.1878  | 0.0494   | 1.45E-04 | +++++    | 6.61E-01 | 10347   | -0.2105 | 0.078    | 9.86E-03 | ---      | 4.36E-01 | 29048   | -0.1952 | 0.0426   | 4.72E-06 | ++       | 8.21E-01 |
| rs6583833  | 0.94399780 | KF11 | c | 18637 | -0.1056 | 0.0283  | 1.94E-04 | +++++    | 6.12E-01 | 7875     | -0.0436 | 0.0375  | 2.45E-01 | -?       | 1.44E-01 | 26512    | -0.0831 | 0.0226  | 2.34E-04 | ++       | 1.87E-01 |          |
| rs7078243  | 0.94404243 | KF11 | a | g     | 18636   | 0.105   | 0.0284   | 2.13E-04 | +++++    | 6.11E-01 | 7873    | 0.0474  | 0.0375   | 2.06E-01 | ++       | 1.50E-01 | 26509   | 0.084   | 0.0226   | 2.07E-04 | ++       | 2.21E-01 |
| rs4933734  | 0.94404547 | KF11 | a | t     | 18810   | 0.151   | 0.0414   | 2.64E-04 | +++++    | 6.34E-01 | 10356   | -0.0015 | 0.0595   | 9.80E-01 | +++      | 1.58E-03 | 29166   | 0.1013  | 0.034    | 2.89E-03 | ++       | 3.54E-02 |
| rs6583834  | 0.94409276 | KF11 | a | g     | 18741   | 0.1368  | 0.0371   | 2.29E-04 | +++++    | 5.65E-01 | 10344   | 0.0972  | 0.0559   | 8.24E-02 | +++      | 5.11E-01 | 29085   | 0.1247  | 0.0309   | 5.49E-05 | ++       | 5.55E-01 |
| rs7914504  | 0.94411998 | KF11 | a | t     | 18743   | -0.1401 | 0.0372   | 1.64E-04 | +++++    | 5.69E-01 | 10341   | -0.1074 | 0.0553   | 5.20E-02 | ---      | 6.30E-01 | 29084   | -0.1299 | 0.0309   | 2.57E-05 | ++       | 6.24E-01 |
| rs7096187  | 0.94413406 | KF11 | a | g     | 18742   | -0.1412 | 0.0372   | 1.44E-04 | +++++    | 5.62E-01 | 10339   | -0.095  | 0.0557   | 8.79E-02 | ---      | 5.74E-01 | 29081   | -0.1269 | 0.0309   | 4.07E-05 | ++       | 4.39E-01 |
| rs2488087  | 0.944166   |      |   |       |         |         |          |          |          |          |         |         |          |          |          |          |         |         |          |          |          |          |

|            |            |          |          |        |   |       |         |         |          |          |          |          |         |         |          |          |          |          |         |         |          |          |          |          |
|------------|------------|----------|----------|--------|---|-------|---------|---------|----------|----------|----------|----------|---------|---------|----------|----------|----------|----------|---------|---------|----------|----------|----------|----------|
| 208        | rs4757880  | 11       | 20006435 | NAV2   | a | g     | 14732   | 0.0517  | 0.0256   | 4.33E-02 | +++?++   | 3.26E-01 | 10336   | 0.0017  | 0.0337   | 9.61E-01 | ---      | 6.09E-01 | 25068   | 0.0334  | 0.0204   | 1.01E-01 | ++       | 2.37E-01 |
|            | rs920675   | 11       | 20006846 | NAV2   | a | g     | 18691   | 0.0651  | 0.0229   | 4.48E-03 | ++++++   | 4.69E-01 | 10288   | 0.0128  | 0.0291   | 6.60E-01 | ---      | 3.19E-01 | 28979   | 0.0451  | 0.018    | 1.22E-02 | ++       | 1.58E-01 |
|            | rs1101166  | 11       | 20007755 | NAV2   | t | c     | 12480   | -0.0846 | 0.0279   | 2.39E-03 | ---?+?   | 1.55E-01 | 7487    | -0.037  | 0.0341   | 2.78E-01 | ??       | 1.00E+00 | 19967   | -0.0655 | 0.0216   | 0.41E-03 | ---      | 2.80E-01 |
|            | rs1230601  | 11       | 20008788 | NAV2   | t | c     | 12497   | -0.0878 | 0.0281   | 1.77E-03 | ---?+?   | 2.38E-01 | 7487    | -0.036  | 0.034    | 2.90E-01 | ??       | 1.00E+00 | 19964   | -0.0668 | 0.0217   | 2.05E-03 | ---      | 2.40E-01 |
|            | rs1033224  | 11       | 20012324 | NAV2   | a | g     | 18643   | 0.0903  | 0.023    | 8.67E-04 | ++++++   | 2.29E-01 | 9972    | 0.011   | 0.0295   | 7.09E-01 | ??       | 1.09E+00 | 28615   | 0.0603  | 0.0181   | 8.83E-04 | ++       | 3.40E-02 |
|            | rs12276043 | 11       | 20012329 | NAV2   | a | g     | 14648   | -0.0797 | 0.0263   | 2.60E-03 | ---?+?   | 1.14E-01 | 9972    | -0.002  | 0.0294   | 9.46E-01 | ??       | 1.86E+00 | 19489   | -0.0469 | 0.0197   | 2.62E-03 | ---      | 4.66E-02 |
|            | rs1731550  | 11       | 20012849 | NAV2   | a | g     | 14654   | -0.0769 | 0.0264   | 3.57E-03 | ---?+?   | 1.92E-01 | 9948    | -0.0008 | 0.0295   | 9.79E-01 | ??       | 1.62E+00 | 24602   | -0.0431 | 0.0197   | 2.86E-02 | ---      | 5.46E-02 |
|            | rs1945337  | 11       | 21378572 |        | a | g     | 12698   | 0.0449  | 0.0287   | 1.18E-01 | +++?+?   | 1.59E-02 | 10330   | -0.0349 | 0.0297   | 2.40E-01 | ---      | 9.37E-01 | 23028   | 0.0604  | 0.0206   | 7.58E-01 | ++       | 5.33E-02 |
|            | rs11026216 | 11       | 2142439  |        | a | g     | 16750   | -0.0911 | 0.0246   | 2.18E-04 | -----    | 8.57E-01 | 10347   | 0.0498  | 0.0291   | 8.78E-02 | +++      | 9.35E-01 | 27097   | -0.0324 | 0.0188   | 8.48E-02 | ++       | 2.18E-04 |
|            | rs12289507 | 11       | 21752855 |        | t | c     | 16691   | -0.0959 | 0.0245   | 9.22E-05 | -----    | 8.00E-01 | 10353   | 0.0469  | 0.0291   | 1.07E-01 | +++      | 9.77E-01 | 27044   | -0.0367 | 0.0187   | 5.04E-02 | ++       | 1.74E-04 |
| rs1725896  | 11         | 21785869 |          | a      | g | 8702  | -0.0913 | 0.0251  | 9.22E-03 | -----    | 8.60E-01 | 10169    | 0.0438  | 0.0295  | 1.38E-01 | +++      | 8.99E-01 | 18871    | -0.0121 | 0.0226  | 5.91E-01 | ++       | 3.21E-03 |          |
| rs10766882 | 11         | 21790876 |          | t      | c | 16461 | 0.055   | 0.0246  | 2.56E-02 | +++++?   | 4.11E-03 | 10363    | -0.0501 | 0.0291  | 8.55E-02 | ---      | 9.72E-01 | 26824    | 0.0112  | 0.0188  | 5.51E-01 | ++       | 5.81E-03 |          |
| rs1026257  | 11         | 21791089 |          | a      | g | 18795 | 0.0143  | 0.023   | 5.33E-01 | +++++    | 9.26E-04 | 10360    | -0.0487 | 0.0291  | 9.45E-02 | ---      | 9.82E-01 | 29155    | -0.0099 | 0.018   | 8.28E-01 | ++       | 8.94E-02 |          |
| rs1083638  | 11         | 21791344 |          | a      | g | 18794 | 0.0576  | 0.023   | 1.25E-02 | ++++++   | 9.04E-03 | 10362    | -0.0502 | 0.0292  | 8.49E-02 | ---      | 9.75E-01 | 29156    | -0.0163 | 0.0181  | 3.66E-01 | ++       | 3.73E-03 |          |
| rs10333641 | 11         | 21796969 |          | a      | g | 18798 | 0.0569  | 0.023   | 1.36E-02 | ++++++   | 6.74E-03 | 10346    | -0.0513 | 0.0291  | 7.32E-02 | ---      | 9.57E-01 | 29134    | 0.0151  | 0.018   | 3.97E-01 | ++       | 3.53E-03 |          |
| rs1948121  | 11         | 21809061 |          | a      | g | 16177 | 0.0488  | 0.0251  | 5.17E-02 | +++++?   | 2.94E-03 | 10305    | -0.0591 | 0.0293  | 4.37E-02 | ---      | 8.52E-01 | 26482    | 0.0031  | 0.0191  | 8.70E-01 | ++       | 5.16E-03 |          |
| rs1032229  | 11         | 21809745 |          | t      | c | 18775 | -0.0542 | 0.023   | 1.85E-02 | +++++?   | 5.14E-03 | 10356    | -0.0533 | 0.0292  | 6.76E-02 | ---      | 9.52E-01 | 29131    | 0.0118  | 0.0171  | 4.71E-01 | ++       | 3.83E-03 |          |
| 210        | rs1451327  | 11       | 57747669 |        | a | g     | 14831   | -0.1536 | 0.0369   | 3.11E-05 | -----    | 6.26E-01 | 7874    | 0.0162  | 0.0416   | 6.98E-01 | ++       | 9.85E-01 | 22705   | -0.0788 | 0.0276   | 4.30E-03 | ++       | 2.26E-03 |
|            | rs12802604 | 11       | 57748268 |        | t | c     | 14828   | 0.1519  | 0.0369   | 3.88E-05 | +++++?   | 6.03E-01 | 387     | 0.0161  | 0.2      | 9.36E-01 | ??       | 1.00E+00 | 15215   | 0.1474  | 0.0363   | 4.85E-05 | ++       | 5.04E-01 |
|            | rs1031358  | 11       | 57750500 | OR10Q1 | a | g     | 14784   | -0.1422 | 0.037    | 1.22E-04 | -----    | 6.16E-01 | 385     | 0.004   | 0.2005   | 9.84E-01 | ??       | 1.00E+00 | 15169   | -0.1374 | 0.0364   | 1.60E-04 | ++       | 4.73E-01 |
|            | rs11229304 | 11       | 57754915 |        | t | c     | 16391   | -0.1255 | 0.035    | 3.41E-04 | -----    | 5.28E-01 | 2841    | -0.099  | 0.2007   | 1.40E-01 | ++       | 5.53E-01 | 19232   | -0.1198 | 0.031    | 1.13E-04 | ++       | 7.26E-01 |
|            | rs11229305 | 11       | 57754937 |        | t | c     | 14426   | -0.1175 | 0.038    | 2.00E-03 | ---?+?   | 4.76E-01 | 2843    | -0.0812 | 0.0666   | 2.23E-01 | ++       | 6.52E-01 | 17269   | -0.1086 | 0.033    | 1.00E-03 | ++       | 6.36E-01 |
|            | rs11229307 | 11       | 57756724 |        | t | c     | 18812   | -0.1244 | 0.032    | 1.00E-04 | -----    | 6.93E-01 | 2871    | -0.0853 | 0.0664   | 1.99E-01 | ++       | 6.37E-01 | 21683   | -0.117  | 0.0288   | 4.93E-01 | ++       | 5.96E-01 |
|            | rs1938659  | 11       | 57765556 |        | a | g     | 18813   | -0.1231 | 0.032    | 1.18E-04 | -----    | 6.97E-01 | 2871    | -0.0853 | 0.0664   | 1.99E-01 | ++       | 6.37E-01 | 21684   | -0.116  | 0.0288   | 5.74E-05 | ++       | 6.08E-01 |
|            | rs1938656  | 11       | 57767287 |        | a | g     | 18855   | 0.0956  | 0.0324   | 1.38E-01 | +++++    | 3.89E-02 | 2855    | 0.0515  | 0.068    | 4.99E-01 | ++       | 7.69E-01 | 23510   | 0.0678  | 0.0241   | 4.95E-03 | ++       | 9.91E-01 |
|            | rs1938668  | 11       | 57772714 |        | a | g     | 18810   | 0.0478  | 0.032    | 1.35E-01 | +++++    | 1.16E-02 | 2872    | 0.0918  | 0.0662   | 1.66E-01 | ++       | 6.13E-01 | 21682   | 0.0681  | 0.0288   | 5.14E-02 | ++       | 5.50E-01 |
|            | rs1938667  | 11       | 57774878 |        | a | g     | 18812   | 0.0449  | 0.032    | 1.60E-01 | +++++    | 6.87E-03 | 10359   | 0.023   | 0.0362   | 5.25E-01 | ++       | 4.16E-01 | 29171   | 0.0353  | 0.024    | 1.41E-01 | ++       | 6.50E-01 |
| rs1938665  | 11         | 57775170 |          | t      | c | 18738 | -0.1257 | 0.032   | 8.74E-05 | -----    | 5.12E-01 | 2872     | -0.0903 | 0.0662  | 1.73E-01 | ++       | 5.96E-01 | 21610    | -0.119  | 0.0288  | 3.62E-05 | ++       | 6.30E-01 |          |
| rs7934043  | 11         | 57778966 |          | t      | c | 18815 | 0.1214  | 0.032   | 1.46E-04 | +++++    | 6.33E-01 | 10362    | 0.0741  | 0.0615  | 2.29E-01 | ++       | 6.98E-01 | 29177    | 0.1113  | 0.0284  | 8.80E-05 | ++       | 4.95E-01 |          |
| rs7935090  | 11         | 57779198 |          | t      | c | 18815 | 0.1212  | 0.032   | 1.50E-04 | +++++    | 6.38E-01 | 2875     | 0.0877  | 0.0662  | 1.85E-01 | ++       | 5.23E-01 | 21690    | 0.1149  | 0.0288  | 6.70E-05 | ++       | 6.49E-01 |          |
| rs1938640  | 11         | 57779992 |          | t      | c | 18815 | -0.1221 | 0.032   | 1.51E-04 | -----    | 6.35E-01 | 2875     | -0.0877 | 0.0662  | 1.85E-01 | ++       | 5.23E-01 | 21690    | -0.1148 | 0.0288  | 6.78E-05 | ++       | 6.50E-01 |          |
| rs12223901 | 11         | 57781920 |          | t      | c | 18815 | -0.1211 | 0.032   | 1.54E-04 | -----    | 6.34E-01 | 2875     | -0.0877 | 0.0662  | 1.85E-01 | ++       | 5.23E-01 | 21690    | -0.1147 | 0.0288  | 6.87E-05 | ++       | 6.51E-01 |          |
| rs10750892 | 11         | 57784885 |          | a      | g | 18815 | 0.1172  | 0.0319  | 2.44E-04 | +++++    | 5.98E-01 | 2875     | 0.0877  | 0.0662  | 1.85E-01 | ++       | 5.23E-01 | 21690    | 0.1116  | 0.0287  | 1.02E-04 | ++       | 6.88E-01 |          |
| rs7173339  | 11         | 57787530 |          | a      | g | 18815 | -0.1224 | 0.032   | 1.28E-04 | -----    | 6.22E-01 | 2875     | -0.0877 | 0.0662  | 1.85E-01 | ++       | 5.23E-01 | 21690    | -0.1158 | 0.0288  | 5.81E-05 | ++       | 6.37E-01 |          |
| rs9680182  | 11         | 57788287 |          | a      | g | 18763 | 0.1214  | 0.0324  | 1.07E-04 | +++++    | 6.27E-01 | 10363    | 0.0877  | 0.0662  | 1.85E-01 | ++       | 5.23E-01 | 21688    | 0.1174  | 0.0289  | 4.80E-05 | ++       | 6.16E-01 |          |
| rs7930778  | 11         | 57792932 |          | t      | c | 18810 | -0.1194 | 0.032   | 1.92E-04 | -----    | 6.20E-01 | 10360    | -0.0215 | 0.0363  | 5.54E-01 | ++       | 3.99E-01 | 29170    | -0.0766 | 0.024   | 1.42E-03 | ++       | 4.31E-02 |          |
| rs4127346  | 11         | 57798978 |          | a      | t | 18752 | -0.1183 | 0.0322  | 2.36E-04 | -----    | 5.53E-01 | 2849     | -0.1115 | 0.0667  | 9.46E-02 | ++       | 7.83E-01 | 21601    | -0.117  | 0.029   | 5.45E-05 | ++       | 9.27E-01 |          |
| rs10792159 | 11         | 57803648 |          | a      | t | 18750 | -0.1148 | 0.0321  | 3.46E-04 | -----    | 5.88E-01 | 2850     | -0.1122 | 0.0667  | 9.25E-02 | ++       | 8.08E-01 | 21600    | -0.1143 | 0.0289  | 7.75E-05 | ++       | 9.72E-01 |          |
| rs7101864  | 11         | 57809764 |          | a      | g | 18514 | -0.1168 | 0.0322  | 2.84E-04 | -----    | 6.91E-01 | 10328    | -0.1044 | 0.0357  | 5.19E-02 | ++       | 7.80E-01 | 28842    | -0.1135 | 0.0276  | 3.94E-05 | ++       | 8.43E-01 |          |
| rs10897472 | 11         | 57815997 |          | a      | g | 18707 | -0.1192 | 0.0326  | 2.60E-04 | -----    | 7.14E-01 | 10269    | -0.1027 | 0.0369  | 7.30E-01 | ++       | 5.17E-01 | 28976    | -0.0725 | 0.0244  | 3.00E-03 | ++       | 3.05E-02 |          |
| rs7109083  | 11         | 57816658 |          | a      | g | 18778 | -0.1145 | 0.0322  | 3.69E-04 | -----    | 7.03E-01 | 10338    | -0.1033 | 0.0362  | 7.13E-01 | ++       | 3.01E-01 | 29116    | -0.0698 | 0.0241  | 3.72E-03 | ++       | 3.67E-02 |          |
| rs4287351  | 11         | 57820690 |          | a      | t | 18870 | 0.1132  | 0.0321  | 4.27E-04 | +++++    | 7.70E-01 | 10338    | 0.0333  | 0.0362  | 7.13E-01 | ++       | 3.01E-01 | 29118    | 0.0692  | 0.024   | 3.95E-03 | ++       | 3.89E-02 |          |
| rs4938893  | 11         | 57851580 |          | a      | g | 18810 | 0.1119  | 0.0309  | 2.94E-04 | +++++    | 8.40E-01 | 10359    | 0.0065  | 0.0355  | 8.54E-01 | ++       | 2.33E-01 | 29169    | 0.0665  | 0.0233  | 4.35E-03 | ++       | 5.21E-02 |          |
| rs10896754 | 11         | 57861630 |          | t      | c | 14800 | -0.1336 | 0.0355  | 1.70E-04 | -----    | 9.42E-01 | 10355    | -0.0069 | 0.0355  | 8.47E-01 | ++       | 2.24E-01 | 29155    | -0.0702 | 0.0251  | 5.13E-03 | ++       | 1.16E-02 |          |
| rs1928028  | 11         | 57861784 |          | t      | c | 17920 | -0.1131 | 0.0323  | 4.61E-04 | -----    | 6.70E-01 | 10363    | -0.0108 | 0.0362  | 7.65E-01 | ++       | 2.69E-01 | 27383    | -0.0678 | 0.0241  | 4.95E-03 | ++       | 3.50E-02 |          |
| rs65921475 | 11         | 57950127 | OR582    | a      | g | 18792 | 0.1252  | 0.0312  | 6.7E-05  | +++++    | 3.02E-01 | 10356    | 0.007   | 0.03    |          |          |          |          |         |         |          |          |          |          |

|            |    |           |               |   |   |       |         |        |          |          |          |       |         |        |          |     |          |       |         |        |          |     |          |
|------------|----|-----------|---------------|---|---|-------|---------|--------|----------|----------|----------|-------|---------|--------|----------|-----|----------|-------|---------|--------|----------|-----|----------|
| rs1144222  | 11 | 133668611 | GLB1L3        | t | c | 18639 | -0.0507 | 0.0279 | 6.89E-02 | -----    | 1.34E-02 | 9769  | -0.0088 | 0.0356 | 8.04E-01 | 7+  | 3.77E-01 | 28408 | -0.0348 | 0.022  | 1.14E-01 | --  | 3.54E-01 |
| rs2129504  | 12 | 18765617  | PLCZ1         | a | g | 8843  | 0.0077  | 0.0375 | 1.88E-01 | ????-??  | 8.32E-02 | 7487  | -0.01   | 0.036  | 7.81E-01 | ??  | 1.00E+00 | 16330 | -0.0015 | 0.026  | 9.54E-01 | ++  | 7.34E-01 |
| rs1021767  | 12 | 18767268  | PLCZ1         | a | g | 14830 | 0.0914  | 0.0282 | 1.18E-03 | +++++?++ | 1.25E-01 | 10332 | 0.033   | 0.0308 | 2.84E-01 | ++  | 3.54E-01 | 25162 | 0.0648  | 0.0208 | 1.85E-03 | ++  | 1.62E-01 |
| rs12307562 | 12 | 18768845  | PLCZ1         | a | g | 8464  | 0.0025  | 0.0399 | 9.50E-01 | ????-??  | 2.13E-02 | 9789  | 0.0364  | 0.0318 | 2.53E-01 | 7+  | 8.33E-02 | 18253 | 0.0322  | 0.0249 | 3.50E-01 | ++  | 5.06E-01 |
| rs12305012 | 12 | 18769012  | PLCZ1         | a | g | 4512  | -0.1307 | 0.0637 | 4.03E-02 | ????-??  | 3.89E-01 | 7487  | 0.008   | 0.0361 | 8.25E-01 | ??  | 1.00E+00 | 19999 | -0.0257 | 0.0314 | 4.13E-01 | ++  | 5.82E-02 |
| rs10144267 | 12 | 18769915  | PLCZ1         | c | g | 18587 | 0.0409  | 0.0291 | 1.03E-01 | +++++?++ | 8.32E-02 | 10295 | 0.033   | 0.0308 | 2.83E-01 | ++  | 3.25E-01 | 28882 | 0.0377  | 0.0195 | 5.24E-02 | ++  | 8.24E-01 |
| rs1487064  | 12 | 18770818  | PLCZ1         | c | g | 16615 | -0.0329 | 0.0268 | 2.19E-01 | -?+----  | 1.81E-01 | 10314 | -0.0382 | 0.0308 | 2.14E-01 | --- | 2.77E-01 | 26929 | -0.0352 | 0.0202 | 8.18E-02 | --- | 8.97E-01 |
| rs10144269 | 12 | 18771904  | PLCZ1         | a | t | 16370 | 0.0378  | 0.0274 | 1.69E-01 | +++++?+  | 1.26E-02 | 10317 | 0.035   | 0.0308 | 2.56E-01 | --- | 2.35E-01 | 26687 | 0.0366  | 0.0205 | 7.41E-02 | --- | 9.46E-01 |
| rs1027032  | 12 | 18772921  | PLCZ1         | a | g | 16930 | 0.0468  | 0.0255 | 6.69E-02 | +++++?+  | 6.34E-02 | 10315 | 0.0363  | 0.0308 | 2.40E-01 | --- | 2.51E-01 | 27245 | 0.0425  | 0.0196 | 3.04E-02 | --- | 7.93E-01 |
| rs10144270 | 12 | 18773964  | PLCZ1         | t | g | 18629 | 0.0507  | 0.0253 | 4.55E-02 | +++++?+  | 9.24E-02 | 10313 | 0.0381  | 0.0308 | 2.15E-01 | --- | 2.74E-01 | 28942 | 0.0456  | 0.0195 | 1.96E-02 | --- | 7.52E-01 |
| rs9764296  | 12 | 18774030  | PLCZ1         | t | g | 18629 | 0.0507  | 0.0253 | 4.54E-02 | +++++?+  | 9.22E-02 | 10312 | 0.0416  | 0.0308 | 1.76E-01 | --- | 3.06E-01 | 28941 | 0.047   | 0.0195 | 1.61E-02 | --- | 8.19E-01 |
| rs10144272 | 12 | 18775683  | PLCZ1         | a | g | 18587 | 0.0525  | 0.0253 | 3.82E-02 | +++++?+  | 7.87E-02 | 10305 | 0.0386  | 0.0308 | 2.06E-01 | --- | 2.73E-01 | 28892 | 0.0468  | 0.0195 | 1.62E-02 | --- | 7.26E-01 |
| rs10770395 | 12 | 18775923  | PLCZ1         | a | g | 16640 | -0.0312 | 0.0264 | 2.36E-01 | -?+----  | 9.65E-02 | 10316 | -0.0394 | 0.0304 | 1.94E-01 | --- | 4.32E-01 | 26956 | -0.0427 | 0.0199 | 8.15E-02 | --- | 8.39E-01 |
| rs9792408  | 12 | 18776163  | PLCZ1         | a | g | 16371 | 0.0394  | 0.0268 | 1.53E-01 | +++++?+  | 4.51E-02 | 10314 | 0.0468  | 0.0303 | 1.23E-01 | --- | 5.01E-01 | 26685 | 0.0401  | 0.0201 | 3.60E-02 | --- | 8.36E-01 |
| rs10144273 | 12 | 18777098  | PLCZ1         | a | g | 10808 | 0.0308  | 0.0336 | 3.59E-01 | ????-??  | 1.81E-01 | 10325 | 0.0465  | 0.0307 | 1.90E-01 | --- | 2.34E-01 | 21033 | 0.0394  | 0.0227 | 8.25E-02 | --- | 7.30E-01 |
| rs7485517  | 12 | 18779723  | PLCZ1         | a | g | 18806 | -0.0901 | 0.0247 | 2.58E-04 | -----    | 7.99E-01 | 10253 | -0.0354 | 0.0302 | 2.42E-01 | --- | 3.32E-01 | 29159 | -0.0662 | 0.0191 | 3.62E-04 | --- | 1.61E-01 |
| rs10144275 | 12 | 18779950  | PLCZ1         | t | c | 18722 | -0.0485 | 0.0247 | 4.98E-02 | -----    | 5.33E-02 | 10342 | -0.0395 | 0.0304 | 1.94E-01 | --- | 3.66E-01 | 29064 | -0.0449 | 0.0192 | 1.91E-02 | --- | 8.18E-01 |
| rs12300257 | 12 | 18780416  | PLCZ1, CAP2A3 | c | g | 18727 | -0.0444 | 0.0248 | 7.37E-02 | -----    | 4.70E-02 | 10360 | -0.042  | 0.0303 | 1.66E-01 | --- | 3.54E-01 | 29087 | -0.0438 | 0.0192 | 2.36E-02 | --- | 9.51E-01 |
| rs10841080 | 12 | 18780814  | PLCZ1, CAP2A3 | a | c | 16325 | 0.0454  | 0.0272 | 9.47E-02 | +++++?+  | 4.90E-02 | 10302 | 0.0418  | 0.0305 | 1.71E-01 | --- | 2.61E-01 | 26287 | 0.0434  | 0.0203 | 3.09E-02 | --- | 9.30E-01 |
| rs12306752 | 12 | 18780832  | PLCZ1, CAP2A3 | t | c | 18715 | -0.0489 | 0.0248 | 4.88E-02 | -----    | 5.35E-02 | 10343 | -0.0409 | 0.0304 | 1.79E-01 | --- | 3.24E-01 | 29058 | -0.0457 | 0.0192 | 1.74E-02 | --- | 8.38E-01 |
| rs1075421  | 12 | 18782346  | PLCZ1, CAP2A3 | t | c | 18511 | -0.0499 | 0.0253 | 4.82E-02 | -----    | 5.60E-02 | 10293 | -0.0429 | 0.0305 | 1.59E-01 | --- | 2.58E-01 | 28804 | -0.047  | 0.0195 | 1.57E-02 | --- | 8.60E-01 |
| rs7131551  | 12 | 18786111  |               | a | g | 8443  | 0.0067  | 0.0379 | 8.60E-01 | ????-??  | 4.79E-02 | 10103 | 0.0363  | 0.0308 | 2.39E-01 | --- | 4.41E-01 | 18946 | 0.0245  | 0.0239 | 3.05E-01 | ++  | 5.44E-01 |
| rs16914583 | 12 | 18787049  |               | c | g | 14108 | -0.0295 | 0.0297 | 3.20E-01 | -?+----  | 7.76E-02 | 10134 | -0.0367 | 0.0308 | 2.34E-01 | --- | 3.97E-01 | 24422 | -0.033  | 0.0214 | 1.23E-01 | --- | 8.66E-01 |
| rs10770397 | 12 | 18789552  | PLCZ1         | a | g | 10374 | 0.0005  | 0.0331 | 9.88E-01 | +++++?+  | 1.12E-01 | 7855  | 0.0147  | 0.0348 | 6.73E-01 | -?  | 8.61E-01 | 18169 | 0.0077  | 0.024  | 7.83E-01 | ++  | 7.68E-01 |
| rs10144279 | 12 | 18793297  | PLCZ1         | a | g | 8843  | 0.0094  | 0.0378 | 8.25E-01 | ????-??  | 1.98E-02 | 10356 | 0.0344  | 0.0307 | 1.89E-01 | --- | 6.28E-02 | 25247 | -0.0351 | 0.0256 | 6.65E-02 | --- | 8.60E-04 |
| rs10841134 | 12 | 19831174  |               | a | g | 14371 | -0.0871 | 0.0289 | 2.57E-03 | -?+----  | 2.13E-01 | 10353 | -0.0396 | 0.0308 | 1.98E-01 | --- | 1.26E-01 | 25124 | -0.0778 | 0.0221 | 1.88E-01 | --- | 2.70E-03 |
| rs7298390  | 12 | 19832243  |               | c | g | 16804 | 0.0807  | 0.0267 | 2.56E-03 | +++++?+  | 2.77E-01 | 10350 | -0.0409 | 0.0308 | 1.84E-01 | --- | 1.42E-01 | 27154 | -0.0285 | 0.0202 | 1.57E-01 | --- | 2.85E-03 |
| rs9762547  | 12 | 19834638  |               | a | g | 14667 | 0.0864  | 0.0289 | 2.80E-03 | +++++?+  | 2.81E-01 | 10347 | -0.035  | 0.0308 | 2.55E-01 | --- | 9.45E-02 | 25014 | 0.0296  | 0.0211 | 1.61E-01 | --- | 4.05E-03 |
| rs9762553  | 12 | 19834650  |               | t | g | 16810 | 0.0801  | 0.0267 | 2.74E-03 | +++++?+  | 2.87E-01 | 10363 | -0.0398 | 0.0308 | 1.96E-01 | --- | 1.28E-01 | 27173 | 0.0287  | 0.0202 | 1.56E-01 | --- | 3.27E-03 |
| rs9776559  | 12 | 19834849  |               | t | c | 16810 | -0.08   | 0.0267 | 2.75E-03 | +++++?+  | 2.87E-01 | 10363 | -0.0398 | 0.0308 | 1.96E-01 | --- | 1.28E-01 | 27173 | -0.0286 | 0.0202 | 1.56E-01 | --- | 3.29E-03 |
| rs10144855 | 12 | 19835818  |               | a | g | 16808 | -0.03   | 0.0267 | 2.61E-01 | -?+----  | 1.89E-02 | 10363 | 0.0392  | 0.0308 | 2.02E-01 | --- | 1.21E-01 | 27171 | -0.0063 | 0.0202 | 9.88E-01 | --- | 8.96E-02 |
| rs10144856 | 12 | 19835914  |               | a | g | 14398 | -0.1069 | 0.0296 | 3.03E-04 | -----    | 7.78E-01 | 10343 | 0.0405  | 0.0308 | 1.88E-01 | --- | 1.38E-01 | 24741 | -0.0301 | 0.0213 | 9.05E-02 | --- | 5.59E-04 |
| rs10144857 | 12 | 19836199  |               | t | c | 16811 | 0.0804  | 0.0267 | 2.63E-03 | +++++?+  | 2.81E-01 | 10363 | -0.0398 | 0.0308 | 1.96E-01 | --- | 1.28E-01 | 27174 | 0.0288  | 0.0202 | 1.53E-01 | --- | 3.19E-03 |
| rs1044858  | 12 | 19836311  |               | a | g | 16811 | -0.0804 | 0.0267 | 2.62E-03 | +++++?+  | 2.81E-01 | 10363 | -0.0398 | 0.0308 | 1.96E-01 | --- | 1.28E-01 | 27174 | -0.0288 | 0.0202 | 1.53E-01 | --- | 3.19E-03 |
| rs2731621  | 12 | 19836487  |               | a | g | 16640 | -0.0735 | 0.0271 | 3.35E-04 | -----    | 4.32E-01 | 10348 | -0.0386 | 0.0308 | 2.10E-01 | --- | 1.03E-01 | 26888 | -0.0408 | 0.0202 | 1.69E-01 | --- | 3.19E-03 |
| rs10841360 | 12 | 19836833  |               | a | g | 16811 | -0.0804 | 0.0267 | 2.64E-03 | +++++?+  | 2.81E-01 | 10363 | -0.0398 | 0.0308 | 1.96E-01 | --- | 1.28E-01 | 27174 | -0.0288 | 0.0202 | 1.53E-01 | --- | 3.19E-03 |
| rs1527262  | 12 | 19837209  |               | a | c | 16810 | -0.0804 | 0.0267 | 2.63E-03 | +++++?+  | 2.81E-01 | 10363 | -0.0398 | 0.0308 | 1.96E-01 | --- | 1.28E-01 | 27175 | -0.0288 | 0.0202 | 1.53E-01 | --- | 3.19E-03 |
| rs10841362 | 12 | 19838993  |               | t | g | 16433 | -0.1042 | 0.0273 | 1.35E-04 | -----    | 8.46E-01 | 10316 | 0.0394  | 0.0308 | 2.01E-01 | --- | 1.22E-01 | 26749 | -0.0401 | 0.0204 | 4.47E-02 | --- | 4.85E-04 |
| rs10505848 | 12 | 19839175  |               | a | g | 18813 | -0.0828 | 0.0251 | 9.54E-04 | -----    | 3.84E-01 | 10362 | 0.0383  | 0.0308 | 2.13E-01 | --- | 1.36E-01 | 29175 | -0.0345 | 0.0195 | 7.65E-02 | --- | 2.30E-03 |
| rs1465089  | 12 | 19840118  |               | a | g | 18800 | 0.082   | 0.0251 | 1.09E-03 | -----    | 4.34E-01 | 10346 | -0.0445 | 0.0307 | 1.46E-01 | --- | 9.55E-02 | 29146 | -0.0313 | 0.0194 | 1.07E-01 | --- | 1.42E-03 |
| rs9758669  | 12 | 19841180  |               | a | g | 10308 | -0.1223 | 0.0359 | 6.51E-04 | ????-??  | 9.35E-01 | 10238 | 0.0399  | 0.0308 | 1.96E-01 | --- | 1.66E-01 | 20546 | -0.0289 | 0.0234 | 2.17E-01 | --- | 6.06E-04 |
| rs9737387  | 12 | 19841195  |               | a | t | 18710 | 0.0824  | 0.0251 | 1.05E-03 | +++++?+  | 3.89E-01 | 10343 | -0.0414 | 0.0308 | 1.79E-01 | --- | 1.22E-01 | 29053 | -0.033  | 0.0195 | 8.99E-02 | --- | 1.83E-03 |
| rs2694973  | 12 | 19843747  |               | t | c | 14846 | -0.0959 | 0.0275 | 4.90E-04 | -?+----  | 1.99E-01 | 10322 | 0.0485  | 0.0309 | 1.16E-01 | --- | 8.95E-02 | 25168 | -0.0321 | 0.0205 | 1.10E-01 | --- | 4.81E-04 |
| rs9736176  | 12 | 19844460  |               | a | g | 14829 | 0.0671  | 0.0279 | 1.62E-02 | +++++?+  | 3.60E-01 | 10323 | 0.0395  | 0.0308 | 2.00E-01 | --- | 4.77E-02 | 25152 | 0.0191  | 0.0207 | 4.57E-01 | ++  | 1.03E-02 |
| rs1094728  | 12 | 19845487  |               | a | g | 14891 | -0.0957 | 0.0278 | 5.89E-04 | -?+----  | 1.49E-01 | 10356 | 0.0404  | 0.0307 | 1.89E-01 | --- | 6.28E-02 | 25247 | -0.0351 | 0.0256 | 6.65E-02 | --- | 8.60E-04 |
| rs10144913 | 12 | 19911210  |               |   |   |       |         |        |          |          |          |       |         |        |          |     |          |       |         |        |          |     |          |

|     |                  |          |   |   |       |         |        |          |        |          |       |         |        |          |    |          |       |         |        |          |    |          |
|-----|------------------|----------|---|---|-------|---------|--------|----------|--------|----------|-------|---------|--------|----------|----|----------|-------|---------|--------|----------|----|----------|
|     | rs17674423       | 66439715 | t | c | 16693 | 0.0902  | 0.0241 | 1.76E-04 | ++*+*  | 3.98E-01 | 10351 | -0.03   | 0.0288 | 2.97E-01 | ++ | 2.25E-01 | 27044 | 0.0407  | 0.0185 | 2.77E-02 | ++ | 1.37E-03 |
|     | rs12370196       | 66440777 | a | g | 18738 | 0.0884  | 0.0226 | 9.51E-05 | +++++  | 4.95E-01 | 10335 | -0.0291 | 0.0288 | 3.12E-01 | ++ | 2.20E-01 | 29073 | 0.0436  | 0.0178 | 1.42E-02 | ++ | 1.33E-03 |
|     | rs4913255        | 66443318 | t | c | 18784 | -0.0874 | 0.0226 | 1.11E-04 | -----  | 4.85E-01 | 10330 | 0.0283  | 0.0288 | 3.26E-01 | ++ | 2.15E-01 | 29114 | 0.0430  | 0.0178 | 1.49E-02 | ++ | 1.58E-03 |
|     | rs7957455        | 66443673 | t | c | 16441 | 0.0842  | 0.0243 | 5.16E-04 | +++++? | 3.79E-01 | 10329 | -0.0291 | 0.0288 | 3.12E-01 | ++ | 2.13E-01 | 26770 | 0.0371  | 0.0186 | 4.59E-02 | ++ | 2.64E-03 |
|     | rs10402207       | 66443857 | t | c | 18647 | -0.0865 | 0.0227 | 1.41E-04 | -----  | 3.77E-01 | 10328 | 0.0151  | 0.0291 | 6.05E-01 | ++ | 2.20E-01 | 28985 | 0.0481  | 0.0179 | 7.25E-03 | ++ | 5.51E-03 |
|     | rs2014130        | 66454320 | a | g | 18693 | -0.0474 | 0.0227 | 3.70E-02 | -----  | 1.16E-02 | 10361 | 0.0127  | 0.0291 | 6.61E-01 | ++ | 1.75E-01 | 29054 | 0.0407  | 0.0179 | 1.68E-02 | ++ | 1.03E-01 |
|     | rs10492026       | 66454597 | a | g | 18672 | 0.0869  | 0.0227 | 1.31E-04 | +++++  | 3.54E-01 | 10360 | -0.0111 | 0.0291 | 7.05E-01 | ++ | 1.76E-01 | 29032 | 0.0499  | 0.0179 | 5.34E-03 | ++ | 7.99E-03 |
|     | <b>rs1176866</b> | 66458793 | a | t | 16630 | -0.1061 | 0.0244 | 1.32E-05 | -----? | 8.00E-01 | 10367 | 0.0184  | 0.0291 | 5.27E-01 | ++ | 2.00E-01 | 26927 | 0.0547  | 0.0187 | 3.44E-02 | ++ | 1.04E-03 |
| 231 | rs1176917        | 66553869 | a | c | 14691 | -0.0348 | 0.0287 | 2.26E-01 | ?-+*   | 7.51E-03 | 9975  | 0.0037  | 0.0322 | 9.09E-01 | ?- | 3.35E-01 | 24666 | 0.0178  | 0.0214 | 4.07E-01 | ++ | 3.72E-01 |
|     | <b>rs1905446</b> | 66559766 | c | c | 14679 | 0.1066  | 0.0283 | 1.63E-04 | +++++  | 6.44E-01 | 10270 | 0.0004  | 0.0316 | 8.89E-01 | ++ | 5.91E-01 | 24949 | 0.0593  | 0.0211 | 4.89E-02 | ++ | 1.23E-02 |
|     | rs10878683       | 66560646 | c | g | 14776 | 0.0985  | 0.0283 | 5.15E-04 | +++++  | 5.66E-01 | 10323 | 0.0071  | 0.0321 | 8.26E-01 | ++ | 4.95E-01 | 25099 | 0.0585  | 0.0212 | 5.83E-03 | ++ | 3.27E-02 |
|     | rs4103248        | 66561584 | a | g | 14830 | -0.0949 | 0.0283 | 7.99E-04 | -+*    | 5.60E-01 | 10362 | 0.0062  | 0.032  | 8.47E-01 | -  | 5.17E-01 | 25192 | 0.0586  | 0.0212 | 8.88E-02 | ++ | 3.79E-02 |
|     | rs10878684       | 66561761 | a | t | 14823 | 0.0301  | 0.0283 | 2.87E-01 | +++++  | 4.78E-02 | 10363 | 0.0066  | 0.032  | 8.37E-01 | ++ | 5.02E-01 | 25186 | 0.0198  | 0.0212 | 3.51E-01 | ++ | 5.82E-01 |
|     | rs1796311        | 66689423 | a | g | 14642 | -0.069  | 0.052  | 1.85E-01 | -+*-?  | 1.65E-02 | 10359 | -0.0801 | 0.053  | 1.30E-01 | ++ | 1.02E-01 | 26821 | 0.0144  | 0.0371 | 4.49E-02 | ++ | 8.81E-01 |
|     | rs17963209       | 66703853 | a | g | 18395 | -0.1003 | 0.0509 | 4.85E-02 | -----  | 6.62E-02 | 10259 | -0.121  | 0.0613 | 4.83E-02 | ++ | 3.21E-01 | 28844 | -0.1087 | 0.0392 | 5.49E-03 | ++ | 9.95E-01 |
|     | rs2250248        | 66702637 | a | g | 18794 | -0.0813 | 0.0472 | 8.49E-02 | -----  | 6.36E-01 | 10359 | -0.0801 | 0.053  | 1.30E-01 | ++ | 1.02E-01 | 29153 | 0.0808  | 0.0352 | 2.19E-02 | ++ | 9.87E-01 |
|     | rs1675575        | 66702905 | t | c | 18812 | 0.0801  | 0.0471 | 8.86E-02 | +++++  | 6.73E-01 | 10361 | 0.1108  | 0.0571 | 5.21E-02 | ++ | 5.94E-02 | 29173 | 0.0925  | 0.0363 | 1.09E-02 | ++ | 6.78E-01 |
|     | rs1614694        | 66703012 | a | g | 18812 | -0.0801 | 0.0471 | 8.86E-02 | -----  | 6.74E-01 | 10361 | -0.0811 | 0.053  | 1.26E-01 | ++ | 1.02E-01 | 29173 | -0.0805 | 0.0352 | 2.22E-02 | ++ | 9.89E-01 |
|     | rs1796325        | 66703620 | a | g | 18812 | -0.0801 | 0.0471 | 8.86E-02 | -----  | 6.74E-01 | 10361 | -0.0811 | 0.053  | 1.26E-01 | ++ | 1.02E-01 | 29173 | -0.0805 | 0.0352 | 2.22E-02 | ++ | 9.89E-01 |
|     | rs1675576        | 66703708 | c | g | 18814 | -0.0803 | 0.0471 | 8.80E-02 | -----  | 6.71E-01 | 10361 | -0.0811 | 0.053  | 1.26E-01 | ++ | 1.02E-01 | 29175 | -0.0807 | 0.0352 | 2.20E-02 | ++ | 9.91E-01 |
|     | rs1675577        | 66703721 | a | g | 16469 | 0.0612  | 0.052  | 2.39E-01 | +++++? | 6.79E-01 | 10361 | 0.1109  | 0.057  | 5.16E-02 | ++ | 5.94E-02 | 26830 | 0.0838  | 0.0384 | 2.92E-02 | ++ | 5.20E-01 |
|     | rs2708024        | 66703778 | a | g | 18812 | -0.0801 | 0.0471 | 8.86E-02 | -----  | 6.74E-01 | 10361 | -0.1122 | 0.0571 | 4.93E-02 | ++ | 5.79E-02 | 29173 | -0.0931 | 0.0363 | 1.04E-02 | ++ | 6.65E-01 |
|     | rs2251464        | 66703903 | a | t | 18814 | -0.0794 | 0.0471 | 9.15E-02 | -----  | 6.80E-01 | 10361 | -0.0804 | 0.053  | 1.29E-01 | ++ | 1.03E-01 | 29175 | -0.0798 | 0.0352 | 2.33E-02 | ++ | 9.89E-01 |
|     | rs1796266        | 66704187 | t | g | 14777 | -0.0618 | 0.0519 | 2.34E-01 | -+*-?  | 6.50E-01 | 10361 | -0.1143 | 0.057  | 4.50E-02 | ++ | 5.57E-02 | 26838 | -0.0856 | 0.0384 | 2.57E-02 | ++ | 4.96E-01 |
|     | rs1658806        | 66704242 | c | g | 18812 | -0.0804 | 0.0472 | 8.49E-02 | -----  | 6.59E-01 | 10359 | -0.0811 | 0.053  | 1.35E-01 | ++ | 1.05E-01 | 29129 | -0.0813 | 0.0352 | 2.15E-02 | ++ | 9.71E-01 |
|     | rs1656807        | 66704513 | c | g | 14997 | -0.0581 | 0.0501 | 2.46E-01 | -+*-?  | 7.70E-01 | 10361 | 0.0811  | 0.057  | 1.26E-01 | ++ | 1.02E-01 | 25358 | 0.069   | 0.0362 | 5.82E-02 | ++ | 7.53E-01 |
|     | rs1675578        | 66704854 | c | g | 18812 | -0.0826 | 0.0471 | 7.93E-02 | -----  | 6.53E-01 | 10361 | -0.0789 | 0.053  | 1.36E-01 | ++ | 1.05E-01 | 29173 | -0.081  | 0.0352 | 2.15E-02 | ++ | 9.58E-01 |
|     | rs1284717        | 66707309 | t | c | 18812 | -0.0833 | 0.0471 | 7.66E-02 | -----  | 6.51E-01 | 10361 | -0.1156 | 0.057  | 4.26E-02 | ++ | 5.42E-02 | 29173 | -0.0964 | 0.0363 | 7.93E-03 | ++ | 6.62E-01 |
|     | rs1284715        | 66708061 | a | g | 18812 | -0.0843 | 0.047  | 7.29E-02 | -----  | 6.46E-01 | 10361 | -0.1123 | 0.057  | 4.89E-02 | ++ | 5.79E-02 | 29174 | -0.0956 | 0.0363 | 8.36E-03 | ++ | 7.05E-01 |
|     | rs2253566        | 66710963 | a | c | 18813 | 0.0842  | 0.0469 | 7.26E-02 | +++++  | 6.48E-01 | 10361 | 0.1073  | 0.0568 | 5.91E-02 | ++ | 6.38E-02 | 29174 | 0.0936  | 0.0362 | 9.68E-03 | ++ | 7.54E-01 |
|     | rs1796305        | 66711605 | a | g | 18813 | -0.0844 | 0.0469 | 7.22E-02 | -----  | 6.48E-01 | 10361 | -0.077  | 0.0528 | 1.45E-01 | ++ | 1.08E-01 | 29174 | -0.0811 | 0.0351 | 2.07E-02 | ++ | 9.17E-01 |
|     | rs1796304        | 66711814 | t | c | 16477 | 0.0648  | 0.0518 | 2.11E-01 | +++++? | 6.34E-01 | 10361 | 0.1065  | 0.0568 | 6.12E-02 | ++ | 6.46E-02 | 26838 | 0.0837  | 0.0383 | 2.89E-02 | ++ | 5.88E-01 |
|     | rs19304445       | 66712574 | t | c | 18813 | -0.0844 | 0.0469 | 7.20E-02 | -----  | 6.49E-01 | 10361 | -0.0783 | 0.0529 | 1.39E-01 | ++ | 1.06E-01 | 29174 | -0.0817 | 0.0351 | 1.99E-02 | ++ | 9.30E-01 |
|     | rs2253279        | 66713117 | t | c | 18813 | 0.0844  | 0.0469 | 7.20E-02 | +++++  | 6.49E-01 | 10361 | 0.0755  | 0.0528 | 1.53E-01 | ++ | 1.10E-01 | 29174 | 0.0805  | 0.0351 | 2.17E-02 | ++ | 9.00E-01 |
|     | rs2252375        | 66713244 | t | c | 18813 | 0.0857  | 0.0469 | 6.78E-02 | +++++  | 6.59E-01 | 10361 | 0.0783  | 0.0529 | 1.39E-01 | ++ | 1.06E-01 | 29174 | 0.0834  | 0.0351 | 1.89E-02 | ++ | 8.17E-01 |
|     | rs2254885        | 66713750 | a | g | 18813 | -0.0855 | 0.0469 | 6.84E-02 | -----  | 6.37E-01 | 10361 | -0.0783 | 0.0529 | 1.39E-01 | ++ | 1.06E-01 | 29174 | -0.0823 | 0.0351 | 1.90E-02 | ++ | 9.19E-01 |
|     | rs1461284        | 66714037 | a | g | 18781 | 0.084   | 0.0471 | 7.49E-02 | +++++  | 6.41E-01 | 10361 | 0.1073  | 0.0568 | 5.91E-02 | ++ | 6.38E-02 | 29142 | 0.0935  | 0.0363 | 9.92E-03 | ++ | 7.52E-01 |
|     | rs1922751        | 66716029 | a | t | 18813 | -0.0857 | 0.0469 | 6.80E-02 | -----  | 6.47E-01 | 10358 | -0.076  | 0.0531 | 1.52E-01 | ++ | 1.09E-01 | 29171 | -0.0814 | 0.0352 | 2.05E-02 | ++ | 8.91E-01 |
|     | rs2261431        | 66716492 | a | g | 18813 | -0.0842 | 0.0469 | 7.27E-02 | -----  | 6.42E-01 | 10361 | -0.1073 | 0.0568 | 5.91E-02 | ++ | 6.38E-02 | 29174 | -0.0936 | 0.0362 | 9.68E-03 | ++ | 7.54E-01 |
|     | rs2261433        | 66729643 | a | g | 16337 | -0.0392 | 0.0516 | 4.48E-01 | -+*-?  | 5.65E-01 | 10309 | -0.0717 | 0.0576 | 2.13E-01 | ++ | 5.88E-02 | 26646 | -0.0537 | 0.0384 | 1.63E-01 | ++ | 6.74E-01 |
|     | rs1796308        | 66731631 | a | g | 18808 | -0.0865 | 0.0468 | 6.50E-02 | -----  | 7.01E-01 | 10362 | -0.074  | 0.0531 | 1.63E-01 | ++ | 1.59E-01 | 29170 | -0.081  | 0.0351 | 2.10E-02 | ++ | 8.60E-01 |
|     | rs2708019        | 66732175 | t | c | 18811 | -0.0644 | 0.0469 | 1.70E-01 | -----  | 5.21E-01 | 10362 | -0.0767 | 0.0532 | 1.50E-02 | ++ | 1.53E-01 | 29173 | -0.0698 | 0.0352 | 4.73E-02 | ++ | 8.62E-01 |
|     | rs1796310        | 66733093 | c | t | 18774 | -0.0867 | 0.0468 | 6.40E-02 | -----  | 7.06E-01 | 10363 | -0.1091 | 0.0563 | 5.26E-02 | ++ | 8.35E-02 | 29137 | -0.0959 | 0.036  | 7.74E-03 | ++ | 7.60E-01 |
|     | rs2611437        | 66733650 | t | c | 16446 | -0.0771 | 0.052  | 1.38E-01 | -----? | 7.40E-01 | 10361 | -0.0709 | 0.052  | 1.82E-01 | ++ | 1.66E-01 | 26807 | -0.0741 | 0.0372 | 4.64E-02 | ++ | 9.94E-01 |
|     | rs1658810        | 66733747 | t | c | 18770 | 0.1004  | 0.0472 | 3.46E-02 | +++++  | 6.30E-01 | 10359 | 0.0747  | 0.0529 | 1.58E-01 | ++ | 1.71E-01 | 29129 | 0.089   | 0.0351 | 1.15E-02 | ++ | 9.17E-01 |
|     | rs1658811        | 66737247 | a | g | 18678 | 0.109   | 0.0473 | 2.11E-02 | +++++  | 6.18E-01 | 10298 | 0.0817  | 0.0526 | 1.21E-01 | ++ | 1.85E-01 | 28976 | 0.0968  | 0.0352 | 5.92E-03 | ++ | 7.00E-01 |
|     | rs1675585        | 66738018 | c | t | 18767 | -0.1101 | 0.0474 | 2.02E-02 | -----  | 6.83E-01 | 10346 | -0.0693 | 0.0533 | 1.94E-01 | ++ | 1.12E-01 | 29113 | -0.0921 | 0.0354 | 9.33E-03 | ++ | 5.67E-01 |
|     | rs165            |          |   |   |       |         |        |          |        |          |       |         |        |          |    |          |       |         |        |          |    |          |

|     |             |    |            |        |   |   |       |         |        |          |        |          |       |         |        |          |     |          |       |         |        |          |    |          |
|-----|-------------|----|------------|--------|---|---|-------|---------|--------|----------|--------|----------|-------|---------|--------|----------|-----|----------|-------|---------|--------|----------|----|----------|
|     | rs17068014  | 13 | 77064315   | SCCL   | a | t | 16783 | 0.0633  | 0.0365 | 8.30E-02 | +?+?+? | 9.37E-03 | 10344 | -0.0919 | 0.046  | 4.58E-02 | --- | 7.31E-01 | 27127 | 0.0033  | 0.0286 | 9.07E-01 | ++ | 8.22E-03 |
|     | rs17068019  | 13 | 77064319   | SCCL   | a | c | 16783 | 0.0633  | 0.0365 | 8.27E-02 | +?+?+? | 9.36E-03 | 10344 | -0.0919 | 0.046  | 4.58E-02 | --- | 7.31E-01 | 27127 | 0.0033  | 0.0286 | 9.07E-01 | ++ | 8.22E-03 |
|     | rs17068033  | 13 | 77065536   | SCCL   | t | c | 18816 | 0.0548  | 0.0345 | 1.12E-01 | +?+?+? | 1.47E-02 | 10341 | -0.0929 | 0.0459 | 4.30E-02 | --- | 7.46E-01 | 29157 | 0.0015  | 0.0276 | 9.57E-01 | ++ | 1.01E-02 |
|     | rs1472583   | 13 | 77092268   | SCCL   | t | c | 16649 | 0.0647  | 0.0366 | 7.73E-02 | +?+?+? | 8.44E-03 | 10328 | -0.092  | 0.0459 | 4.51E-02 | --- | 8.28E-01 | 26977 | 0.0038  | 0.0286 | 8.95E-01 | ++ | 7.60E-03 |
|     | rs17068013  | 13 | 77108013   | SCCL   | t | c | 16611 | 0.073   | 0.0367 | 4.68E-02 | +?+?+? | 4.94E-03 | 10324 | -0.0942 | 0.046  | 4.05E-02 | --- | 8.64E-01 | 26977 | 0.0058  | 0.0287 | 7.81E-01 | ++ | 4.49E-03 |
|     | rs17068137  | 13 | 77109029   | SCCL   | a | g | 16723 | 0.1546  | 0.0631 | 1.80E-02 | +?+?+? | 5.51E-03 | 10355 | -0.1026 | 0.0456 | 2.44E-02 | --- | 9.22E-01 | 27078 | 0.0058  | 0.0383 | 4.99E-02 | ++ | 9.77E-06 |
|     | rs2274014   | 13 | 77116246   | SCCL   | t | g | 16616 | 0.0665  | 0.0363 | 6.67E-02 | +?+?+? | 3.02E-03 | 10342 | -0.0912 | 0.0454 | 4.47E-02 | --- | 9.97E-01 | 26958 | 0.005   | 0.0284 | 8.60E-01 | ++ | 6.67E-03 |
| 238 | rs131616380 | 13 | 79603316   |        | t | g | 14655 | -0.1193 | 0.0296 | 5.70E-05 | -?+?+? | 8.02E-02 | 9927  | -0.0669 | 0.0325 | 3.98E-02 | ?   | 7.09E-01 | 24582 | -0.0955 | 0.0219 | 1.27E-05 | ++ | 2.33E-01 |
|     | rs17072370  | 13 | 79603731   |        | a | t | 14688 | -0.1299 | 0.0292 | 8.49E-06 | -?+?+? | 2.45E-01 | 9971  | -0.066  | 0.0323 | 4.11E-02 | ?   | 9.58E-01 | 24659 | -0.1012 | 0.0217 | 3.01E-06 | ++ | 1.42E-01 |
|     | rs1215468   | 13 | 79605430   | SPRY2  | a | g | 14695 | 0.1282  | 0.0289 | 9.54E-06 | -?+?+? | 2.57E-01 | 9974  | -0.0688 | 0.0324 | 3.36E-02 | ?   | 9.90E-01 | 24669 | -0.1019 | 0.0216 | 2.31E-06 | ++ | 1.71E-01 |
|     | rs1327315   | 13 | 79606733   |        | t | c | 16679 | -0.1038 | 0.027  | 1.23E-04 | -?+?+? | 6.29E-02 | 10340 | -0.0874 | 0.0319 | 6.19E-03 | --- | 8.71E-03 | 27019 | -0.097  | 0.0206 | 2.55E-06 | ++ | 9.92E-01 |
|     | rs1215451   | 13 | 79613894   |        | a | g | 18793 | -0.0909 | 0.026  | 4.87E-04 | -?+?+? | 7.48E-02 | 10337 | -0.096  | 0.032  | 2.74E-03 | --- | 7.48E-03 | 29130 | -0.0929 | 0.0202 | 4.12E-06 | ++ | 6.05E-01 |
|     | rs1359790   | 13 | 79615157   |        | a | g | 18719 | -0.0232 | 0.026  | 3.73E-01 | +?+?+? | 1.04E-03 | 10337 | -0.0952 | 0.032  | 2.95E-03 | --- | 7.41E-03 | 29056 | -0.0718 | 0.0202 | 1.02E-02 | ++ | 8.08E-02 |
| 239 | rs9301717   | 13 | 90672066   |        | t | c | 18615 | -0.0987 | 0.0349 | 4.62E-03 | -?+?+? | 9.87E-03 | 10353 | -0.0456 | 0.0414 | 2.71E-01 | --- | 8.87E-01 | 28968 | -0.0566 | 0.0267 | 4.08E-03 | ++ | 3.27E-01 |
|     | rs9397769   | 13 | 90676691   |        | t | c | 18725 | -0.0953 | 0.0345 | 5.72E-03 | -?+?+? | 8.36E-03 | 10360 | -0.0456 | 0.0413 | 2.69E-01 | --- | 9.31E-01 | 29085 | -0.0749 | 0.0265 | 4.69E-03 | ++ | 3.56E-01 |
|     | rs7320223   | 13 | 90676691   |        | a | g | 16676 | 0.1219  | 0.0382 | 1.44E-03 | +?+?+? | 4.97E-01 | 10254 | 0.0466  | 0.0418 | 6.65E-01 | --- | 8.70E-01 | 27030 | 0.0876  | 0.0282 | 1.89E-03 | ++ | 1.84E-01 |
|     | rs1330068   | 13 | 90683486   |        | t | c | 18680 | -0.0792 | 0.0346 | 2.20E-02 | -?+?+? | 9.95E-01 | 10356 | -0.0451 | 0.0415 | 2.77E-01 | --- | 9.15E-01 | 29386 | -0.0652 | 0.0266 | 1.14E-02 | ++ | 5.28E-01 |
|     | rs9523274   | 13 | 90684065   |        | t | c | 16683 | -0.1161 | 0.0401 | 3.83E-03 | -?+?+? | 9.82E-01 | 10340 | -0.0393 | 0.0425 | 3.55E-01 | --- | 9.47E-01 | 27023 | -0.0799 | 0.0292 | 6.14E-03 | ++ | 1.89E-01 |
|     | rs9583901   | 13 | 90684716   |        | t | c | 18767 | -0.1252 | 0.0359 | 4.80E-04 | -?+?+? | 9.99E-01 | 10323 | -0.0518 | 0.0419 | 2.17E-01 | --- | 8.71E-01 | 29090 | -0.0941 | 0.0273 | 5.55E-04 | ++ | 1.83E-01 |
|     | rs9523275   | 13 | 90686041   |        | a | g | 16737 | 0.1279  | 0.0382 | 8.11E-04 | +?+?+? | 9.96E-01 | 10322 | 0.0471  | 0.0419 | 6.26E-01 | --- | 8.36E-01 | 29059 | 0.0912  | 0.0282 | 1.23E-03 | ++ | 1.54E-01 |
|     | rs9515895   | 13 | 90687732   |        | t | c | 18691 | -0.1181 | 0.0378 | 1.76E-03 | -?+?+? | 9.89E-01 | 10329 | -0.0404 | 0.0425 | 3.43E-01 | --- | 9.52E-01 | 29020 | -0.0838 | 0.0282 | 3.01E-03 | ++ | 1.72E-01 |
|     | rs9301719   | 13 | 90688458   |        | a | g | 18692 | 0.1089  | 0.0348 | 1.73E-03 | +?+?+? | 8.81E-01 | 10299 | 0.0478  | 0.0418 | 2.52E-01 | --- | 8.28E-01 | 28991 | 0.0389  | 0.0267 | 1.71E-03 | ++ | 2.61E-01 |
|     | rs9523276   | 13 | 90690675   |        | t | c | 16721 | 0.1216  | 0.0383 | 1.49E-03 | +?+?+? | 9.87E-01 | 10338 | 0.0514  | 0.0419 | 2.19E-01 | --- | 7.39E-01 | 27059 | 0.0896  | 0.0283 | 1.52E-03 | ++ | 2.16E-01 |
| 240 | rs2025452   | 13 | 100964561  | ITGBL1 | a | g | 14825 | -0.0559 | 0.0253 | 2.70E-02 | -?+?+? | 4.71E-02 | 10348 | 0.0296  | 0.0284 | 2.98E-01 | --- | 4.73E-01 | 25173 | -0.0181 | 0.0189 | 3.39E-01 | ++ | 2.46E-02 |
|     | rs1414313   | 13 | 100965284  | ITGBL1 | a | g | 13933 | -0.0469 | 0.026  | 2.79E-02 | -?+?+? | 2.96E-02 | 10325 | 0.034   | 0.0284 | 3.31E-01 | --- | 5.85E-01 | 25157 | -0.0361 | 0.0192 | 6.02E-02 | ++ | 3.56E-02 |
|     | rs9549792   | 13 | 100969172  | ITGBL1 | a | g | 14743 | 0.0893  | 0.0256 | 4.71E-04 | +?+?+? | 9.09E-01 | 10321 | 0.0285  | 0.0285 | 9.71E-01 | --- | 9.09E-01 | 25080 | 0.0602  | 0.019  | 1.58E-03 | ++ | 8.88E-02 |
|     | rs12586000  | 13 | 100970426  | ITGBL1 | t | c | 14738 | 0.053   | 0.0255 | 3.77E-02 | +?+?+? | 4.48E-01 | 10313 | -0.0348 | 0.0284 | 2.20E-01 | --- | 4.66E-01 | 25051 | 0.038   | 0.019  | 4.67E-01 | ++ | 2.14E-02 |
|     | rs12586014  | 13 | 100970657  | ITGBL1 | t | g | 14780 | 0.0615  | 0.0254 | 1.56E-02 | +?+?+? | 3.22E-01 | 10343 | 0.0281  | 0.0284 | 3.23E-01 | --- | 4.58E-01 | 25123 | 0.0467  | 0.0189 | 1.37E-02 | ++ | 3.81E-01 |
|     | rs9300677   | 13 | 100981929  | ITGBL1 | a | g | 14826 | 0.0475  | 0.0254 | 6.17E-02 | +?+?+? | 3.61E-01 | 10272 | -0.0348 | 0.0285 | 2.22E-01 | --- | 7.28E-01 | 25098 | -0.0111 | 0.019  | 5.99E-01 | ++ | 3.11E-02 |
|     | rs954795    | 13 | 100985996  | ITGBL1 | a | g | 18702 | -0.0484 | 0.0227 | 3.32E-02 | -?+?+? | 2.18E-01 | 10290 | 0.0323  | 0.0285 | 2.57E-01 | --- | 7.22E-01 | 28992 | -0.0717 | 0.0178 | 3.36E-02 | ++ | 2.68E-02 |
|     | rs1414312   | 13 | 100995842  | ITGBL1 | a | g | 18550 | -0.0595 | 0.0229 | 9.33E-03 | -?+?+? | 2.57E-01 | 10312 | 0.0337  | 0.0285 | 2.38E-01 | --- | 5.76E-01 | 28862 | -0.0229 | 0.0179 | 1.99E-01 | ++ | 1.08E-02 |
|     | rs885304    | 13 | 101002835  | ITGBL1 | t | c | 16491 | 0.0686  | 0.0243 | 4.78E-03 | +?+?+? | 8.09E-01 | 10338 | -0.0281 | 0.0284 | 3.23E-01 | --- | 8.81E-01 | 26829 | -0.0277 | 0.0183 | 1.33E-02 | ++ | 9.68E-03 |
|     | rs13069448  | 13 | 101019787  | ITGBL1 | t | c | 18774 | 0.0522  | 0.0228 | 2.19E-02 | +?+?+? | 4.35E-01 | 10353 | 0.0215  | 0.0284 | 4.49E-01 | --- | 4.04E-01 | 29127 | -0.0402 | 0.0178 | 2.39E-02 | ++ | 3.99E-01 |
|     | rs9557704   | 13 | 101025496  | ITGBL1 | a | t | 18737 | -0.0528 | 0.0228 | 2.03E-02 | -?+?+? | 4.68E-01 | 10326 | -0.0663 | 0.0284 | 8.24E-01 | --- | 4.01E-01 | 28977 | -0.0437 | 0.0182 | 5.18E-02 | ++ | 2.02E-01 |
|     | rs10139195  | 13 | 101032322  | ITGBL1 | t | g | 12711 | -0.1618 | 0.035  | 2.51E-02 | -?+?+? | 8.31E-01 | 10269 | -0.0712 | 0.0259 | 7.71E-01 | --- | 5.17E-01 | 22880 | -0.0301 | 0.0178 | 4.09E-02 | ++ | 2.18E-02 |
| 241 | rs2213246   | 13 | 21873203   |        | t | c | 18680 | -0.1515 | 0.043  | 4.18E-04 | -?+?+? | 7.63E-01 | 10356 | 0.0229  | 0.0572 | 6.89E-01 | --- | 8.06E-01 | 29036 | -0.0885 | 0.0344 | 1.00E-02 | ++ | 1.48E-02 |
|     | rs2213247   | 13 | 21873224   |        | a | g | 16651 | -0.1778 | 0.0483 | 2.34E-04 | -?+?+? | 8.40E-01 | 10356 | 0.0229  | 0.0572 | 6.89E-01 | --- | 8.06E-01 | 27007 | -0.0943 | 0.0369 | 1.06E-02 | ++ | 7.34E-03 |
|     | rs981423    | 13 | 21878594   |        | a | g | 18699 | -0.1534 | 0.0427 | 3.31E-04 | -?+?+? | 8.32E-01 | 10359 | 0.0263  | 0.0571 | 6.45E-01 | --- | 8.57E-01 | 29058 | -0.0889 | 0.0342 | 9.29E-03 | ++ | 1.17E-02 |
|     | rs8014927   | 13 | 21908470   |        | a | g | 18710 | 0.1099  | 0.0428 | 1.01E-02 | +?+?+? | 1.44E-01 | 10350 | -0.0356 | 0.0575 | 5.36E-01 | --- | 5.60E-01 | 29060 | -0.0589 | 0.0343 | 9.10E-02 | ++ | 4.24E-02 |
|     | rs2051536   | 13 | 21911637   |        | t | c | 18704 | -0.1534 | 0.0426 | 3.23E-04 | -?+?+? | 8.13E-01 | 10357 | 0.0205  | 0.0571 | 7.20E-01 | --- | 8.24E-01 | 29061 | -0.0912 | 0.0341 | 7.55E-03 | ++ | 1.47E-02 |
|     | rs2877454   | 13 | 21919601   |        | a | c | 18683 | -0.1451 | 0.0426 | 6.64E-04 | -?+?+? | 7.45E-01 | 10355 | 0.0208  | 0.0571 | 7.15E-01 | --- | 8.52E-01 | 29038 | -0.0858 | 0.0341 | 1.20E-02 | ++ | 1.99E-02 |
|     | rs2204983   | 13 | 21919803   |        | t | c | 14815 | -0.1482 | 0.0479 | 1.96E-03 | -?+?+? | 6.47E-01 | 10336 | 0.0147  | 0.0555 | 7.91E-01 | --- | 6.78E-01 | 25151 | -0.0787 | 0.0363 | 3.01E-02 | ++ | 2.63E-02 |
|     | rs1243473   | 13 | 21926789   |        | t | c | 16316 | 0.1659  | 0.0451 | 2.31E-04 | +?+?+? | 9.03E-01 | 10352 | -0.0231 | 0.0577 | 6.89E-01 | --- | 7.91E-01 | 26688 | -0.0492 | 0.0355 | 8.01E-03 | ++ | 9.68E-03 |
|     | rs9826224   | 13 | 21927364   |        | a | g | 14778 | -0.1441 | 0.0448 | 1.28E-03 | -?+?+? | 8.32E-02 | 2852  | 0.1197  | 0.117  | 2.63E-01 | --- | 9.71E-01 | 27630 | -0.1048 | 0.0413 | 1.13E-02 | ++ | 2.30E-02 |
|     | rs13811244  | 13 | 21929522</ |        |   |   |       |         |        |          |        |          |       |         |        |          |     |          |       |         |        |          |    |          |



|     |            |         |        |          |       |          |       |         |        |          |    |          |       |         |        |          |    |          |
|-----|------------|---------|--------|----------|-------|----------|-------|---------|--------|----------|----|----------|-------|---------|--------|----------|----|----------|
|     | rs4775248  | -0.0526 | 0.0229 | 2.16E-04 | ----- | 2.45E-02 | 10342 | -0.0086 | 0.0412 | 8.35E-01 | ++ | 7.10E-04 | 29026 | -0.0422 | 0.02   | 3.49E-02 | -- | 3.51E-01 |
|     | rs4775253  | 0.0525  | 0.0229 | 2.16E-04 | +++++ | 3.10E-02 | 10335 | -0.0044 | 0.0392 | 9.11E-01 | ++ | 7.30E-04 | 29078 | 0.038   | 0.0198 | 5.45E-02 | ++ | 2.10E-01 |
|     | rs4775256  | 0.0525  | 0.0229 | 2.16E-04 | +++++ | 3.09E-02 | 10335 | -0.0207 | 0.0387 | 5.94E-01 | ++ | 1.66E-04 | 29078 | 0.0335  | 0.0197 | 8.90E-02 | ++ | 1.04E-01 |
|     | rs21258529 | 0.0606  | 0.0229 | 8.04E-03 | +++++ | 4.59E-02 | 10347 | 0.0189  | 0.0389 | 6.29E-01 | ++ | 2.90E-02 | 29110 | -0.0402 | 0.0197 | 4.18E-02 | ++ | 7.86E-02 |
|     | rs21258715 | 0.0601  | 0.0229 | 8.04E-03 | +++++ | 4.66E-02 | 10347 | -0.0001 | 0.0386 | 9.99E-01 | ++ | 2.04E-03 | 29110 | 0.0440  | 0.0197 | 2.41E-02 | ++ | 1.80E-01 |
|     | rs8036882  | 0.0779  | 0.0246 | 1.51E-03 | +++++ | 3.45E-01 | 10335 | -0.0275 | 0.0376 | 4.65E-01 | ++ | 1.27E-04 | 26744 | -0.0463 | 0.0206 | 2.45E-02 | ++ | 1.90E-02 |
|     | rs8037063  | -0.0601 | 0.0229 | 8.64E-03 | ----- | 4.70E-02 | 10347 | 0.0193  | 0.0379 | 6.10E-01 | ++ | 4.17E-04 | 29110 | -0.0389 | 0.0196 | 4.74E-02 | ++ | 7.30E-02 |
|     | rs8038522  | -0.0883 | 0.0246 | 3.26E-04 | ----- | 6.35E-01 | 10347 | 0.0245  | 0.0376 | 5.14E-01 | ++ | 2.70E-04 | 26775 | -0.0545 | 0.0206 | 8.12E-03 | ++ | 1.21E-02 |
|     | rs1716125  | -0.0578 | 0.0228 | 1.14E-02 | ----- | 6.91E-02 | 10352 | -0.0006 | 0.029  | 9.83E-01 | ++ | 1.31E-02 | 29148 | -0.0359 | 0.0179 | 4.49E-02 | ++ | 1.21E-01 |
|     | rs2470655  | -0.0604 | 0.023  | 8.49E-03 | ----- | 5.98E-02 | 10338 | 0.024   | 0.0368 | 5.14E-01 | ++ | 8.08E-04 | 29018 | -0.0367 | 0.0195 | 5.99E-02 | ++ | 5.18E-02 |
|     | rs11070505 | -0.0592 | 0.0229 | 9.57E-03 | ----- | 5.89E-02 | 10346 | 0.012   | 0.0326 | 7.13E-01 | ++ | 3.31E-03 | 29119 | -0.0357 | 0.0187 | 5.69E-02 | ++ | 7.39E-02 |
|     | rs355396   | 0.0582  | 0.0229 | 1.09E-02 | +++++ | 7.22E-02 | 10349 | 0.0032  | 0.029  | 9.38E-01 | ++ | 6.04E-03 | 29161 | 0.0371  | 0.018  | 3.91E-02 | ++ | 1.37E-01 |
|     | rs355399   | -0.0138 | 0.0415 | 7.39E-01 | ????? | 4.82E-02 | 9794  | -0.0184 | 0.0293 | 5.13E-01 | ?? | 1.41E-02 | 16641 | -0.0168 | 0.0243 | 4.88E-01 | ?? | 9.28E-01 |
| 253 | rs492365   | 0.0573  | 0.0244 | 1.31E-04 | +++++ | 1.87E-01 | 10349 | 0.012   | 0.0353 | 1.09E-01 | ?? | 5.73E-01 | 22706 | -0.046  | 0.0203 | 3.10E-03 | ?? | 7.95E-01 |
|     | rs575231   | 0.0867  | 0.0244 | 3.17E-04 | +++++ | 5.00E-01 | 7850  | 0.0609  | 0.0334 | 6.84E-02 | ?? | 4.13E-01 | 24473 | -0.0777 | 0.0197 | 7.99E-05 | ?? | 5.33E-01 |
|     | rs9920076  | -0.0815 | 0.0256 | 1.43E-03 | ----- | 3.09E-01 | 7863  | -0.0555 | 0.0331 | 9.35E-02 | ?? | 3.71E-01 | 22509 | -0.0718 | 0.0203 | 3.94E-04 | ?? | 5.34E-01 |
|     | rs9920246  | 0.1012  | 0.0278 | 2.67E-04 | +++++ | 6.04E-01 | 7865  | 0.054   | 0.0331 | 1.03E-01 | ?? | 4.12E-01 | 20577 | 0.0817  | 0.0213 | 1.25E-04 | ?? | 2.75E-01 |
|     | rs17171318 | 0.0822  | 0.0257 | 1.38E-03 | +++++ | 3.88E-01 | 7861  | 0.0555  | 0.0331 | 9.34E-02 | ?? | 3.73E-01 | 22510 | 0.0722  | 0.0203 | 3.79E-04 | ?? | 5.24E-01 |
|     | rs1718379  | -0.0816 | 0.0256 | 1.43E-03 | ----- | 3.63E-01 | 10181 | -0.0529 | 0.029  | 6.83E-02 | ?? | 7.10E-01 | 24855 | -0.0609 | 0.0192 | 3.22E-04 | ?? | 4.58E-01 |
|     | rs10851589 | -0.0828 | 0.0255 | 1.16E-03 | ----- | 3.53E-01 | 10274 | -0.0521 | 0.0289 | 7.12E-02 | ?? | 8.08E-01 | 25047 | -0.0694 | 0.0191 | 2.86E-04 | ?? | 4.26E-01 |
|     | rs4774800  | -0.0762 | 0.0255 | 2.81E-03 | ----- | 2.95E-01 | 10333 | -0.0495 | 0.0288 | 8.55E-02 | ?? | 8.04E-01 | 25163 | -0.0645 | 0.0191 | 7.34E-04 | ?? | 4.88E-01 |
|     | rs12438177 | 0.05    | 0.0282 | 7.69E-02 | +++++ | 2.92E-01 | 10333 | 0.0547  | 0.0288 | 5.76E-02 | ?? | 8.20E-01 | 25141 | 0.0623  | 0.0201 | 9.44E-03 | ?? | 9.07E-01 |
| 254 | rs24320402 | -0.1009 | 0.0278 | 2.75E-04 | ----- | 3.88E-01 | 7870  | -0.0091 | 0.0334 | 7.85E-01 | ?? | 9.03E-01 | 22696 | -0.0633 | 0.0214 | 3.04E-03 | ?? | 3.46E-02 |
| 255 | rs4775203  | -0.0941 | 0.0251 | 7.93E-02 | ----- | 2.90E-02 | 10349 | 0.012   | 0.0351 | 6.91E-01 | ++ | 6.47E-01 | 26852 | -0.0211 | 0.0193 | 2.24E-04 | ++ | 1.52E-01 |
|     | rs17601517 | -0.0991 | 0.025  | 1.18E-01 | ----- | 2.16E-02 | 9971  | 0.0274  | 0.0306 | 6.64E-01 | ?? | 6.51E-01 | 26561 | -0.0145 | 0.0194 | 5.45E-01 | ?? | 1.20E-01 |
|     | rs17162645 | 0.0448  | 0.0251 | 7.40E-02 | +++++ | 2.21E-02 | 10353 | -0.0119 | 0.0301 | 6.92E-01 | ++ | 8.08E-01 | 26954 | -0.0215 | 0.0193 | 2.64E-01 | ++ | 1.48E-01 |
|     | rs6494140  | -0.0789 | 0.0287 | 6.00E-03 | ----- | 2.06E-01 | 7868  | 0.0196  | 0.0353 | 5.79E-01 | ?? | 9.44E-01 | 20594 | -0.0397 | 0.0223 | 7.46E-02 | ?? | 3.04E-02 |
|     | rs12439645 | 0.0407  | 0.0235 | 8.32E-02 | +++++ | 3.67E-02 | 10354 | -0.0121 | 0.0301 | 6.87E-01 | ++ | 8.25E-01 | 28984 | -0.0207 | 0.0185 | 2.64E-01 | ++ | 1.67E-01 |
|     | rs12439707 | -0.0922 | 0.0261 | 4.07E-04 | ----- | 6.23E-01 | 10295 | 0.01    | 0.0303 | 7.41E-01 | ++ | 5.75E-01 | 25107 | -0.0487 | 0.0198 | 1.39E-02 | ++ | 1.06E-02 |
|     | rs8026404  | -0.0443 | 0.0235 | 6.46E-02 | ----- | 3.45E-02 | 10355 | 0.0339  | 0.0301 | 6.45E-01 | ++ | 7.92E-01 | 29008 | -0.0216 | 0.0185 | 2.43E-01 | ++ | 1.34E-01 |
| 256 | rs2241492  | -0.1074 | 0.026  | 3.53E-05 | ----- | 4.47E-01 | 10270 | -0.0445 | 0.032  | 1.65E-01 | ?? | 8.25E-01 | 28848 | -0.0824 | 0.0202 | 4.45E-05 | ?? | 1.27E-01 |
|     | rs8037603  | -0.0913 | 0.0254 | 3.34E-04 | ----- | 4.44E-01 | 10173 | -0.0321 | 0.0286 | 2.62E-01 | ?? | 1.81E-01 | 24892 | -0.0652 | 0.019  | 5.97E-04 | ?? | 1.22E-01 |
|     | rs17364010 | -0.0971 | 0.0253 | 1.24E-04 | ----- | 3.52E-01 | 10292 | -0.0343 | 0.0284 | 2.28E-01 | ?? | 1.23E-01 | 25080 | -0.0693 | 0.0189 | 2.43E-04 | ?? | 1.87E-01 |
|     | rs17618164 | -0.0937 | 0.0253 | 2.07E-04 | ----- | 4.61E-01 | 10281 | -0.0353 | 0.0284 | 2.42E-01 | ?? | 1.43E-01 | 25111 | -0.0617 | 0.0189 | 3.92E-04 | ?? | 1.76E-01 |
|     | rs17163757 | -0.1024 | 0.0231 | 1.43E-03 | ----- | 2.47E-01 | 10267 | -0.0721 | 0.0294 | 1.43E-02 | ?? | 1.17E-01 | 20869 | -0.0859 | 0.0217 | 7.40E-05 | ?? | 4.86E-01 |
|     | rs6494307  | 0.0804  | 0.024  | 7.92E-04 | +++++ | 3.65E-01 | 10343 | 0.0931  | 0.0294 | 1.56E-03 | ?? | 3.05E-01 | 28885 | 0.0585  | 0.0186 | 2.72E-06 | ?? | 7.38E-01 |
|     | rs17167878 | -0.0485 | 0.0436 | 2.66E-01 | ????? | 2.75E-01 | 9769  | -0.1023 | 0.0305 | 8.04E-04 | ?? | 3.09E-02 | 16283 | -0.0846 | 0.025  | 7.09E-04 | ?? | 3.12E-01 |
|     | rs17172432 | 0.0895  | 0.0236 | 1.45E-04 | +++++ | 5.31E-01 | 10299 | 0.1189  | 0.0288 | 3.62E-05 | ?? | 7.62E-02 | 28949 | 0.1013  | 0.0183 | 2.86E-04 | ?? | 4.30E-01 |
|     | rs17173964 | -0.079  | 0.0256 | 2.00E-03 | ----- | 5.24E-01 | 10256 | -0.121  | 0.0298 | 4.99E-05 | ?? | 5.31E-02 | 26532 | -0.0668 | 0.0194 | 6.14E-07 | ?? | 2.85E-01 |
|     | rs920178   | -0.0677 | 0.0269 | 1.17E-02 | ----- | 3.44E-01 | 10361 | -0.1151 | 0.0333 | 5.53E-04 | ?? | 1.71E-01 | 25168 | -0.0864 | 0.0209 | 3.63E-05 | ?? | 2.68E-01 |
|     | rs1436953  | -0.0683 | 0.0268 | 1.09E-02 | ----- | 3.42E-01 | 10355 | -0.1261 | 0.029  | 1.37E-05 | ?? | 9.06E-02 | 25186 | -0.0949 | 0.0197 | 1.42E-06 | ?? | 1.43E-01 |
|     | rs4774658  | 0.0364  | 0.0269 | 1.77E-01 | +++++ | 9.45E-02 | 10349 | 0.1133  | 0.0334 | 7.00E-04 | ?? | 1.47E-01 | 25114 | 0.0667  | 0.0201 | 1.46E-03 | ?? | 7.30E-02 |
|     | rs6494309  | -0.0564 | 0.03   | 6.00E-02 | ----- | 4.27E-01 | 10314 | -0.1142 | 0.035  | 6.48E-04 | ?? | 1.56E-01 | 22744 | -0.0821 | 0.0223 | 2.38E-04 | ?? | 1.79E-01 |
|     | rs6494310  | -0.0533 | 0.0301 | 1.68E-02 | ----- | 4.13E-01 | 10314 | -0.1142 | 0.035  | 6.48E-04 | ?? | 1.56E-01 | 22744 | -0.0821 | 0.0224 | 2.38E-04 | ?? | 1.79E-01 |
|     | rs17205526 | -0.0789 | 0.0235 | 1.55E-02 | ----- | 3.98E-01 | 10210 | -0.1097 | 0.0337 | 1.15E-03 | ?? | 9.67E-02 | 20861 | -0.0938 | 0.0234 | 6.28E-05 | ?? | 5.11E-01 |
| 257 | rs17166293 | -0.1127 | 0.0314 | 3.34E-04 | ----- | 5.05E-01 | 10357 | -0.0297 | 0.0383 | 4.39E-01 | ++ | 5.62E-01 | 29106 | -0.0793 | 0.0243 | 1.09E-03 | ++ | 9.38E-02 |
|     | rs11637488 | -0.1131 | 0.0314 | 1.16E-04 | ----- | 5.06E-01 | 10357 | -0.0297 | 0.0383 | 4.39E-01 | ++ | 5.62E-01 | 29106 | -0.0793 | 0.0243 | 1.05E-03 | ++ | 9.22E-02 |
|     | rs12913233 | 0.0842  | 0.0234 | 3.25E-04 | +++++ | 5.90E-01 | 10359 | 0.0657  | 0.0289 | 2.30E-02 | ++ | 7.87E-01 | 29156 | 0.0769  | 0.0182 | 2.37E-05 | ++ | 6.19E-01 |
|     | rs17388406 | -0.103  | 0.0351 | 3.36E-03 | ----- | 7.69E-01 | 10363 | -0.0277 | 0.0417 | 5.06E-01 | ++ | 5.85E-01 | 29175 | -0.0718 | 0.0269 | 7.52E-03 | ++ | 1.67E-01 |
|     | rs11638043 | -0.1047 | 0.0351 | 2.88E-03 | ----- | 7.51E-01 | 10362 | -0.027  | 0.0417 | 5.17E-01 | ++ | 5.91E-01 | 29174 | -0.0725 | 0.0269 | 6.95E-03 | ++ | 1.54E-01 |
|     | rs11633318 | -0.1218 | 0.0312 | 9.50E-05 | ----- | 5.14E-01 | 10361 | -0.027  | 0.0383 | 4.81E-01 | ++ | 5.42E-01 | 29167 | -0.0824 | 0.0242 | 5.17E-03 | ++ | 5.05E-02 |
|     | rs11636554 | 0.087   | 0.0234 | 2.00E-04 | +++++ | 6.04E-01 | 10339 | 0.0614  | 0.0289 | 3.36E-02 | ++ | 7.31E-01 | 29142 | 0.0769  | 0.0182 | 2.37E-05 | ++ | 4.91E-01 |
|     | rs10519164 | -0.1002 | 0.0352 | 4.42E-03 | ----- | 3.89E-01 | 10362 | -0.0279 | 0.0417 | 5.02E-01 | ++ | 5.91E-01 | 29168 | -0.0701 | 0.0269 | 9.14E-03 | ++ | 1.85E-01 |
|     | rs1544737  | 0.0822  | 0.0234 | 2.10E-04 | +++++ | 5.36E-01 | 10363 | 0.0657  | 0.0289 | 2.31E-02 | ++ | 7.73E-01 | 29179 | 0.0757  | 0.0182 | 3.13E-05 | ++ | 6.57E-01 |
|     | rs17162362 | 0.119   | 0.0313 | 1.45E-04 | +++++ | 5.74E-01 | 10357 | 0.0295  | 0.0383 | 4.41E-01 | ++ | 5.35E-01 | 29106 | 0.0832  | 0.0242 | 6.01E-04 |    |          |

|            |            |          |          |       |       |         |        |          |          |          |          |          |         |           |          |          |          |          |         |          |          |          |          |          |
|------------|------------|----------|----------|-------|-------|---------|--------|----------|----------|----------|----------|----------|---------|-----------|----------|----------|----------|----------|---------|----------|----------|----------|----------|----------|
| rs10514454 | 16         | 77966519 | a        | g     | 18735 | 0.1039  | 0.0293 | 4.00E-04 | +++++    | 5.67E-01 | 9922     | 0.0199   | 0.0355  | 4.30E-02  | 7++      | 4.03E-01 | 28657    | 0.0909   | 0.0226  | 5.72E-05 | ++       | 4.87E-01 |          |          |
| rs16950314 | 16         | 77966683 | t        | c     | 14717 | 0.1192  | 0.0326 | 2.57E-04 | +++++    | 5.62E-01 | 10274    | 0.0711   | 0.0341  | 3.74E-02  | +++      | 5.88E-01 | 24991    | 0.0967   | 0.0236  | 4.43E-05 | ++       | 3.08E-01 |          |          |
| rs17724843 | 16         | 77968611 | c        | g     | 18643 | 0.1133  | 0.0303 | 1.84E-04 | +++++    | 5.84E-01 | 9974     | 0.0568   | 0.0358  | 1.13E-01  | 7++      | 4.06E-01 | 28617    | 0.0892   | 0.0231  | 1.05E-04 | ++       | 2.28E-01 |          |          |
| rs13353724 | 16         | 77940412 | c        | g     | 14751 | 0.1143  | 0.0327 | 4.73E-04 | +++++    | 6.23E-01 | 10280    | 0.0734   | 0.0342  | 3.20E-02  | +++      | 5.99E-01 | 25031    | 0.0948   | 0.0236  | 6.08E-05 | ++       | 3.87E-01 |          |          |
| rs13346466 | 16         | 77966519 | a        | t     | 12452 | 0.1239  | 0.0366 | 7.03E-04 | +++++    | 5.84E-01 | 10276    | 0.0878   | 0.0346  | 1.12E-02  | +++      | 5.82E-01 | 27268    | 0.1048   | 0.0251  | 3.05E-05 | ++       | 4.74E-01 |          |          |
| rs4889555  | 16         | 77955373 | c        | t     | 14755 | 0.057   | 0.0326 | 8.01E-02 | -7-+-    | 5.06E-02 | 10227    | 0.0647   | 0.034   | 5.66E-02  | +++      | 6.96E-01 | 25052    | 0.0607   | 0.0235  | 9.91E-03 | ++       | 8.70E-01 |          |          |
| rs17724884 | 16         | 77946971 | t        | c     | 18536 | 0.116   | 0.03   | 1.09E-04 | +++++    | 6.89E-01 | 10274    | 0.0802   | 0.0349  | 2.16E-02  | +++      | 7.37E-01 | 28810    | 0.1008   | 0.0228  | 9.41E-06 | ++       | 4.37E-01 |          |          |
| rs4606729  | 16         | 77959067 | c        | g     | 12668 | 0.1239  | 0.0346 | 3.41E-04 | +++++    | 5.91E-01 | 10236    | 0.0107   | 0.0303  | 7.25E-01  | +++      | 9.14E-01 | 22904    | 0.0988   | 0.0228  | 8.67E-03 | ++       | 1.38E-02 |          |          |
| rs4128452  | 16         | 77959638 | t        | c     | 12638 | 0.1268  | 0.0351 | 2.98E-04 | +++++    | 6.71E-01 | 10159    | -0.0175  | 0.0301  | 5.61E-01  | ---      | 7.69E-01 | 22797    | 0.0436   | 0.0228  | 5.61E-02 | ++       | 1.80E-03 |          |          |
| rs17797882 | 16         | 77964419 | t        | c     | 18771 | -0.1113 | 0.0297 | 1.76E-04 | +++++    | 3.72E-01 | 10355    | -0.0818  | 0.0326  | 1.21E-02  | ---      | 6.09E-01 | 29126    | -0.0979  | 0.022   | 8.19E-06 | ++       | 5.04E-01 |          |          |
| rs3812994  | 16         | 77966170 | a        | t     | 18611 | -0.101  | 0.0297 | 6.86E-04 | +++++    | 4.80E-01 | 10243    | -0.0912  | 0.034   | 7.42E-03  | ---      | 4.91E-01 | 28854    | -0.0968  | 0.0224  | 1.52E-05 | ++       | 8.28E-01 |          |          |
| rs3812993  | 16         | 77966327 | c        | g     | 16550 | -0.104  | 0.0301 | 5.58E-04 | +++++    | -7-+-    | 2.42E-01 | 10259    | -0.0827 | 0.0343    | 1.58E-02 | ---      | 5.51E-01 | 26809    | -0.0947 | 0.0226   | 2.82E-05 | ++       | 6.41E-01 |          |
| rs4390610  | 16         | 77971170 | t        | c     | 18728 | -0.0732 | 0.0298 | 1.40E-02 | +++++    | 1.17E-01 | 10318    | -0.0745  | 0.0347  | 3.17E-02  | ---      | 4.53E-01 | 29046    | -0.0738  | 0.0226  | 1.11E-02 | ++       | 9.77E-01 |          |          |
| rs1059548  | 16         | 77978861 | a        | g     | 8945  | -0.1298 | 0.0429 | 2.50E-03 | ????     | 3.49E-01 | 9921     | -0.0236  | 0.037   | 5.23E-01  | ?        | 8.08E-01 | 18764    | -0.0689  | 0.0228  | 1.39E-03 | ++       | 6.09E-02 |          |          |
| rs8044853  | 16         | 80051360 | t        | c     | 18651 | 0.0803  | 0.0227 | 4.10E-04 | +++++    | 5.77E-01 | 7875     | 0.0306   | 0.0331  | 3.55E-01  | ++       | 6.39E-01 | 28256    | 0.0644   | 0.0187  | 5.82E-04 | ++       | 2.16E-01 |          |          |
| rs8051009  | 16         | 80016916 | t        | g     | 16427 | -0.0884 | 0.0244 | 2.86E-04 | -3-+-    | 4.65E-01 | 7863     | -0.0278  | 0.0331  | 4.01E-01  | ?        | 5.22E-01 | 24290    | -0.0671  | 0.0196  | 6.69E-04 | ++       | 1.41E-01 |          |          |
| 267        | rs13333580 | 16       | 80045873 | CMP1  | a     | t       | 14755  | 0.0564   | 0.0298   | 8.95E-02 | +++++    | 2.15E-01 | 0334    | 0.322E-02 | +++      | 4.22E-01 | 25069    | 0.0635   | 0.0224  | 4.62E-03 | ++       | 7.18E-01 |          |          |
| rs16955379 | 16         | 80046874 | CMP1     | c     | 14786 | 0.1263  | 0.0298 | 2.20E-05 | +++++    | 7.96E-01 | 10280    | 0.0908   | 0.0334  | 6.59E-03  | +++      | 4.74E-01 | 25066    | 0.1106   | 0.0222  | 6.61E-07 | ++       | 4.28E-01 |          |          |
| rs9930117  | 16         | 80047458 | CMP1     | a     | 12452 | -0.1159 | 0.0327 | 4.02E-04 | -7-+-    | 7.62E-01 | 10255    | -0.0916  | 0.0334  | 6.14E-03  | ---      | 4.43E-01 | 22707    | -0.104   | 0.0224  | 8.54E-06 | ++       | 6.03E-01 |          |          |
| rs12596103 | 16         | 80048054 | CMP1     | c     | 12654 | 0.1449  | 0.0318 | 5.25E-06 | +++++    | 8.37E-01 | 9798     | 0.0836   | 0.0342  | 1.46E-02  | 7++      | 3.58E-01 | 22452    | 0.1165   | 0.0233  | 5.69E-07 | ++       | 1.89E-01 |          |          |
| rs12596138 | 16         | 80048250 | CMP1     | c     | 14826 | 0.1244  | 0.0298 | 2.97E-05 | +++++    | 8.39E-01 | 10259    | 0.0809   | 0.0339  | 1.70E-02  | +++      | 2.73E-01 | 22585    | 0.1054   | 0.0224  | 2.74E-07 | ++       | 3.35E-01 |          |          |
| rs12599890 | 16         | 80054403 | CMP1     | g     | 12738 | 0.137   | 0.0309 | 9.43E-06 | +++++    | 9.06E-01 | 10349    | 0.0725   | 0.0321  | 2.40E-02  | +++      | 1.29E-01 | 23807    | 0.106    | 0.0223  | 1.93E-06 | ++       | 1.48E-01 |          |          |
| rs12596548 | 16         | 80061378 | CMP1     | c     | 14787 | -0.0941 | 0.0266 | 3.99E-04 | -7-+-    | 5.30E-01 | 10318    | -0.0649  | 0.0296  | 2.85E-02  | ---      | 5.30E-01 | 25105    | -0.0811  | 0.0198  | 4.19E-05 | ++       | 4.63E-01 |          |          |
| rs2961221  | 16         | 80061378 | CMP1     | a     | 14829 | 0.0897  | 0.0252 | 3.73E-04 | +++++    | 8.50E-01 | 9920     | 0.0107   | 0.0291  | 7.13E-01  | ??       | 9.19E-01 | 24749    | 0.0588   | 0.019   | 3.27E-03 | ++       | 4.02E-02 |          |          |
| rs1210275  | 16         | 80064455 | ATP2C2   | g     | 14829 | 0.1216  | 0.0329 | 2.39E-04 | +++++    | 3.82E-01 | 7486     | 0.014    | 0.0404  | 7.29E-01  | ??       | 1.00E-01 | 22865    | 0.0387   | 0.0255  | 4.99E-03 | ++       | 8.89E-02 |          |          |
| rs17814267 | 16         | 83004576 | ATP2C2   | a     | 14830 | 0.1491  | 0.0374 | 6.74E-05 | +++++    | 3.21E-01 | 7486     | -0.011   | 0.0434  | 8.00E-01  | ??       | 1.00E-01 | 22316    | 0.0809   | 0.0283  | 4.31E-03 | ++       | 5.20E-03 |          |          |
| rs17741450 | 16         | 83006024 | ATP2C2   | c     | 14731 | -0.1197 | 0.033  | 2.87E-04 | -7-+-    | 1.32E-01 | 7487     | -0.019   | 0.0404  | 6.38E-01  | ??       | 1.00E-01 | 22318    | -0.0794  | 0.0256  | 1.89E-03 | ++       | 5.36E-02 |          |          |
| 269        | rs8082455  | 17       | 14240061 | DCC   | a     | g       | 18797  | 0.1039   | 0.0244   | 2.04E-05 | +++++    | 6.09E-01 | 7875    | 0.0406    | 0.037    | 2.73E-01 | ++       | 9.63E-01 | 26672   | 0.084    | 0.0204   | 3.20E-05 | ++       | 1.53E-01 |
| 270        | rs9910148  | 17       | 16109734 | PGL1  | a     | g       | 8843   | -0.1591  | 0.0584   | 6.48E-03 | ????     | 4.22E-01 | 10210   | -0.0615   | 0.0498   | 2.16E-01 | ---      | 9.28E-01 | 19553   | -0.1026  | 0.0379   | 6.78E-03 | ++       | 2.04E-01 |
| rs2170990  | 17         | 16111489 | PGL1     | c     | 14812 | -0.1314 | 0.0415 | 1.26E-03 | -7-+-    | 7.00E-01 | 10352    | -0.0938  | 0.048   | 5.08E-02  | ---      | 7.24E-01 | 25164    | -0.1168  | 0.0314  | 1.99E-04 | ++       | 5.26E-01 |          |          |
| rs2014604  | 17         | 16117608 | PGL1     | c     | 18787 | 0.1049  | 0.0311 | 7.46E-04 | +++++    | 7.36E-01 | 10334    | 0.0985   | 0.0426  | 2.08E-02  | +++      | 9.78E-01 | 29121    | 0.1027   | 0.0251  | 4.36E-05 | ++       | 9.03E-01 |          |          |
| rs2192687  | 17         | 16118112 | PGL1     | c     | 18812 | 0.1082  | 0.031  | 4.82E-04 | +++++    | 7.20E-01 | 10336    | 0.0977   | 0.0426  | 2.18E-02  | +++      | 9.77E-01 | 29148    | 0.1046   | 0.0251  | 3.02E-05 | ++       | 8.42E-01 |          |          |
| rs12948244 | 17         | 16118825 | PGL1     | c     | 12602 | 0.1026  | 0.0371 | 5.72E-03 | +7+7+    | 5.11E-01 | 10275    | 0.0829   | 0.0427  | 5.21E-02  | +++      | 8.82E-01 | 22877    | 0.0941   | 0.028   | 7.77E-04 | ++       | 7.28E-01 |          |          |
| rs2192622  | 17         | 16123534 | PGL1     | t     | 14831 | 0.1365  | 0.0415 | 9.90E-04 | +++++    | 5.94E-01 | 10361    | 0.0885   | 0.0479  | 6.48E-02  | +++      | 8.19E-01 | 25192    | 0.1159   | 0.0314  | 2.19E-04 | ++       | 4.49E-01 |          |          |
| rs13785626 | 17         | 16129373 | PGL1     | g     | 14832 | 0.136   | 0.0415 | 1.03E-02 | +++++    | 5.96E-01 | 10348    | 0.0856   | 0.0479  | 5.95E-02  | +++      | 7.89E-01 | 25194    | 0.1164   | 0.0314  | 2.05E-04 | ++       | 6.88E-02 |          |          |
| rs11651578 | 17         | 16128317 | PGL1     | a     | 14830 | -0.1338 | 0.0415 | 1.26E-03 | -7-+-    | 5.65E-01 | 10363    | -0.0885  | 0.0479  | 6.48E-02  | ---      | 8.19E-01 | 25193    | -0.1144  | 0.0314  | 2.66E-04 | ++       | 4.75E-01 |          |          |
| rs13785255 | 17         | 16131143 | PGL1     | c     | 14830 | -0.1326 | 0.0414 | 1.38E-03 | -7-+-    | 5.93E-01 | 10363    | -0.0885  | 0.0479  | 6.48E-02  | ---      | 8.19E-01 | 25193    | -0.1137  | 0.0312  | 2.82E-04 | ++       | 4.86E-01 |          |          |
| rs4791665  | 17         | 16136781 | PGL1     | a     | g     | 18784   | 0.1017 | 0.0311   | 1.07E-03 | +++++    | 7.71E-01 | 10328    | 0.0985  | 0.0422    | 1.97E-02 | +++      | 9.76E-01 | 29112    | 0.1006  | 0.025    | 5.89E-05 | ++       | 9.51E-01 |          |
| rs11868284 | 17         | 16137000 | PGL1     | c     | 12494 | 0.1324  | 0.0448 | 3.12E-03 | +++++    | 4.64E-01 | 10361    | 0.0905   | 0.0479  | 5.92E-02  | +++      | 7.86E-01 | 22855    | 0.1128   | 0.0237  | 5.63E-04 | ++       | 5.23E-01 |          |          |
| rs4792731  | 17         | 16142666 | PGL1     | c     | 14831 | 0.136   | 0.0415 | 1.04E-03 | +++++    | 5.96E-01 | 10360    | 0.0907   | 0.0479  | 5.86E-02  | +++      | 7.82E-01 | 25191    | 0.1166   | 0.0314  | 2.02E-04 | ++       | 4.75E-01 |          |          |
| rs6502499  | 17         | 16156930 | PGL1     | a     | 18693 | 0.1004  | 0.0313 | 1.32E-03 | +++++    | 8.87E-01 | 10329    | 0.1014   | 0.0434  | 1.94E-02  | +++      | 9.74E-01 | 29022    | 0.1007   | 0.0254  | 7.24E-05 | ++       | 9.85E-01 |          |          |
| rs3785621  | 17         | 16159571 | PGL1     | c     | 16893 | 0.095   | 0.0319 | 2.88E-03 | +++++    | 8.02E-01 | 10329    | 0.0994   | 0.0435  | 2.21E-02  | +++      | 9.75E-01 | 27222    | 0.0968   | 0.0257  | 1.75E-04 | ++       | 9.35E-01 |          |          |
| 271        | rs13744797 | 17       | 74311430 | USP36 | a     | c       | 14738  | 0.1040   | 0.0391   | 3.32E-04 | +++++    | 9.25E-01 | 10279   | 0.0017    | 0.0444   | 9.69E-01 | +++      | 3.35E-01 | 25017   | 0.0965   | 0.0293   | 6.53E-03 | ++       | 1.91E-02 |
| rs2171960  | 17         | 74313000 | USP36    | c     | 18727 | 0.0961  | 0.0303 | 1.50E-03 | +++++    | 7.54E-01 | 10301    | -0.017   | 0.0442  | 7.01E-01  | ---      | 1.95E-01 | 29028    | 0.0599   | 0.025   | 1.65E-02 | ++       | 3.46E-02 |          |          |
| rs2172231  | 17         | 74317794 | USP36    | a     | g     | 18637   | 0.1071 | 0.0322   | 8.69E-04 | +++++    | 5.06E-01 | 10348    | 0.0056  | 0.0458    | 9.93E-01 | ---      | 1.91E-01 | 29056    | 0.0735  | 0.0263   | 5.29E-03 | ++       | 6.88E-02 |          |
| rs374792   | 17         | 74334822 | USP36    | g     | 16707 | -0.1468 | 0.0384 | 1.34E-04 | -7-+-    | 8.19E-01 | 2835     | 0.0807   | 0.0808  | 9.14E-01  | ++       | 1.48E-01 | 19542    | -0.1181  | 0.0347  | 6.58E-04 | ++       | 8.22E-02 |          |          |
| rs3744791  | 17</       |          |          |       |       |         |        |          |          |          |          |          |         |           |          |          |          |          |         |          |          |          |          |          |

|            |            |          |          |        |       |         |         |          |          |          |          |         |        |          |          |          |          |         |         |          |          |          |          |
|------------|------------|----------|----------|--------|-------|---------|---------|----------|----------|----------|----------|---------|--------|----------|----------|----------|----------|---------|---------|----------|----------|----------|----------|
| rs2051312  | 18         | 55987695 | t        | c      | 16778 | -0.1    | 0.0281  | 3.74E-04 | ---+---  | 1.24E-01 | 10356    | -0.0448 | 0.0324 | 1.66E-01 | --       | 3.30E-01 | 27134    | -0.0763 | 0.0212  | 3.25E-04 | --       | 1.98E-01 |          |
| rs474112   | 18         | 55987812 | t        | c      | 16778 | -0.1    | 0.0281  | 3.72E-04 | ---+---  | 1.24E-01 | 10356    | -0.0448 | 0.0324 | 1.67E-01 | --       | 3.30E-01 | 27134    | -0.0763 | 0.0212  | 3.25E-04 | --       | 1.98E-01 |          |
| rs2051311  | 18         | 55987860 | t        | c      | 18808 | -0.0987 | 0.0275  | 3.27E-04 | ---+---  | 1.41E-01 | 10349    | -0.0411 | 0.0324 | 2.05E-01 | ---      | 4.01E-01 | 19157    | -0.0746 | 0.021   | 3.75E-04 | --       | 1.75E-01 |          |
| rs1619975  | 18         | 55988204 | t        | c      | 18816 | -0.0989 | 0.0275  | 3.18E-04 | ---+---  | 1.47E-01 | 10349    | -0.0483 | 0.0327 | 1.99E-01 | ---      | 4.00E-01 | 19165    | -0.0779 | 0.021   | 2.13E-04 | --       | 2.36E-01 |          |
| rs1673539  | 18         | 55988205 | a        | t      | 16389 | -0.1257 | 0.0269  | 2.60E-05 | ---+---  | 9.62E-01 | 10349    | -0.049  | 0.0327 | 1.34E-01 | ---      | 4.00E-01 | 19168    | -0.0908 | 0.0221  | 3.89E-05 | --       | 8.35E-02 |          |
| rs666181   | 18         | 55988728 | a        | t      | 18801 | -0.0968 | 0.0267  | 2.92E-04 | +++++    | 1.66E-01 | 10362    | -0.0487 | 0.0324 | 1.33E-01 | ---      | 2.92E-01 | 19169    | -0.0773 | 0.0206  | 1.74E-04 | --       | 2.52E-01 |          |
| rs663129   | 18         | 55988881 | a        | c      | 18803 | 0.1124  | 0.0286  | 8.76E-05 | +++++    | 1.01E-01 | 10349    | 0.0551  | 0.0329 | 9.41E-02 | ---      | 3.07E-01 | 19152    | -0.0877 | 0.0216  | 4.81E-05 | --       | 1.89E-01 |          |
| rs571312   | 18         | 55990749 | a        | c      | 18800 | 0.1126  | 0.0287  | 8.70E-05 | +++++    | 9.09E-02 | 10263    | 0.0313  | 0.034  | 3.58E-01 | ---      | 2.30E-01 | 19063    | 0.0788  | 0.0219  | 3.28E-04 | --       | 6.77E-02 |          |
| rs545708   | 18         | 55991199 | t        | c      | 18800 | 0.0998  | 0.0276  | 2.95E-04 | +++++    | 3.78E-01 | 10352    | 0.0402  | 0.0326 | 2.17E-01 | ---      | 4.47E-01 | 19152    | -0.0749 | 0.0211  | 3.76E-04 | --       | 1.63E-01 |          |
| rs591166   | 18         | 55992569 | a        | t      | 16766 | 0.1037  | 0.0291  | 3.64E-04 | +++++    | 2.92E-01 | 10351    | 0.0399  | 0.0324 | 2.19E-01 | ---      | 4.45E-01 | 19177    | -0.0752 | 0.0216  | 5.33E-04 | --       | 1.43E-01 |          |
| rs589580   | 18         | 55992871 | a        | c      | 18799 | 0.097   | 0.0268  | 2.94E-04 | +++++    | 1.48E-01 | 10361    | 0.0436  | 0.0318 | 1.70E-01 | ---      | 2.93E-01 | 19160    | -0.0748 | 0.0205  | 2.61E-04 | --       | 1.99E-01 |          |
| rs975918   | 18         | 55993388 | t        | c      | 18750 | 0.1009  | 0.0276  | 2.55E-04 | +++++    | 3.87E-01 | 10350    | 0.0498  | 0.032  | 1.20E-01 | ---      | 4.55E-01 | 19100    | -0.0791 | 0.0209  | 1.54E-04 | --       | 2.27E-01 |          |
| rs1350341  | 18         | 55993531 | a        | c      | 18796 | 0.0971  | 0.0268  | 2.90E-04 | +++++    | 1.56E-01 | 10351    | 0.0444  | 0.0318 | 1.62E-01 | ---      | 4.29E-01 | 19147    | -0.0752 | 0.0205  | 2.42E-04 | --       | 2.05E-01 |          |
| rs611428   | 18         | 55993865 | a        | c      | 16764 | 0.1035  | 0.0269  | 3.56E-04 | +++++    | 3.55E-01 | 10347    | 0.0435  | 0.0319 | 1.73E-01 | ---      | 3.96E-01 | 19171    | -0.0764 | 0.0215  | 3.74E-04 | --       | 1.64E-01 |          |
| rs553622   | 18         | 55994476 | a        | t      | 18796 | -0.0966 | 0.0266  | 2.87E-04 | ---+---  | 1.79E-01 | 10342    | -0.0535 | 0.0319 | 8.76E-02 | ---      | 2.79E-01 | 19148    | -0.0785 | 0.0203  | 1.07E-04 | --       | 4.57E-01 |          |
| rs559623   | 18         | 55994855 | a        | c      | 16641 | -0.1256 | 0.0289  | 1.39E-05 | ---+---  | 7.49E-01 | 10349    | -0.025  | 0.0293 | 3.92E-01 | ---      | 3.20E-01 | 16810    | -0.076  | 0.0206  | 2.21E-04 | --       | 1.45E-02 |          |
| rs6567161  | 18         | 55995915 | a        | c      | 18746 | 0.1008  | 0.0276  | 2.68E-04 | +++++    | 5.31E-01 | 10343    | 0.0198  | 0.0299 | 5.07E-01 | ---      | 3.89E-01 | 19089    | -0.0303 | 0.0203  | 1.73E-03 | --       | 4.65E-02 |          |
| rs523288   | 18         | 55999349 | a        | t      | 18788 | -0.1083 | 0.0286  | 1.52E-04 | ---+---  | 1.28E-01 | 10346    | -0.0174 | 0.0315 | 5.81E-01 | ---      | 2.07E-01 | 19134    | -0.0677 | 0.0212  | 1.50E-03 | --       | 3.26E-02 |          |
| rs2168711  | 18         | 55999511 | t        | c      | 18791 | -0.1088 | 0.0286  | 1.42E-04 | ---+---  | 1.29E-01 | 10346    | -0.0278 | 0.0327 | 3.96E-01 | ---      | 2.29E-01 | 19137    | -0.0732 | 0.0215  | 6.19E-04 | --       | 6.23E-02 |          |
| rs12967135 | 18         | 56000003 | a        | c      | 16457 | 0.1378  | 0.031   | 8.73E-06 | +++++    | 5.01E-01 | 10345    | 0.0438  | 0.0345 | 2.04E-01 | ---      | 2.70E-01 | 16802    | -0.0958 | 0.0231  | 3.25E-05 | --       | 4.17E-02 |          |
| rs538656   | 18         | 56001402 | t        | c      | 18800 | 0.1081  | 0.0286  | 1.57E-04 | +++++    | 1.02E-01 | 10344    | 0.0376  | 0.0309 | 2.67E-01 | ---      | 3.08E-01 | 19144    | -0.0788 | 0.0219  | 3.13E-04 | --       | 1.22E-01 |          |
| rs1782313  | 18         | 56002077 | t        | c      | 18808 | -0.1064 | 0.0286  | 1.95E-04 | ---+---  | 1.43E-01 | 10335    | -0.0333 | 0.0337 | 3.22E-01 | ---      | 2.66E-01 | 19143    | -0.0758 | 0.0218  | 5.09E-04 | --       | 9.82E-02 |          |
| rs1087177  | 18         | 56002743 | a        | c      | 18810 | -0.1088 | 0.0286  | 1.40E-04 | ---+---  | 1.26E-01 | 10340    | -0.0393 | 0.0334 | 2.39E-01 | ---      | 2.48E-01 | 19150    | -0.0794 | 0.0217  | 2.57E-04 | --       | 1.14E-01 |          |
| rs475134   | 18         | 56003734 | t        | c      | 18752 | 0.0944  | 0.0267  | 4.03E-04 | +++++    | 1.68E-01 | 10338    | 0.0366  | 0.0323 | 2.58E-01 | ---      | 2.18E-01 | 19070    | -0.0709 | 0.0206  | 5.67E-04 | --       | 1.68E-01 |          |
| rs1152213  | 18         | 56003928 | a        | c      | 18807 | -0.1082 | 0.0286  | 1.54E-04 | ---+---  | 1.20E-01 | 10340    | -0.036  | 0.0335 | 2.82E-01 | ---      | 2.32E-01 | 19147    | -0.0748 | 0.0218  | 3.50E-04 | --       | 1.93E-01 |          |
| rs1808964  | 18         | 56009809 | t        | c      | 14731 | -0.0782 | 0.0334  | 1.92E-02 | ---+---  | 6.31E-02 | 10337    | -0.0359 | 0.0347 | 3.02E-01 | ---      | 1.71E-01 | 15068    | -0.0579 | 0.0241  | 1.62E-02 | --       | 3.80E-01 |          |
| rs21969709 | 18         | 56010543 | a        | c      | 14790 | 0.0773  | 0.0333  | 2.03E-02 | ---+---  | 6.46E-02 | 10337    | 0.0359  | 0.0347 | 3.02E-01 | ---      | 1.71E-01 | 15127    | -0.0575 | 0.024   | 1.68E-02 | --       | 3.89E-01 |          |
| rs921971   | 18         | 56012643 | t        | c      | 14830 | -0.0757 | 0.0332  | 2.27E-02 | ---+---  | 6.91E-02 | 10337    | -0.0366 | 0.0348 | 2.92E-01 | ---      | 1.72E-01 | 15167    | -0.0571 | 0.024   | 1.75E-02 | --       | 4.16E-01 |          |
| rs12955983 | 18         | 56023969 | a        | c      | 16348 | -0.1171 | 0.0319  | 2.40E-04 | ---+---  | 3.46E-01 | 10339    | -0.0609 | 0.0358 | 8.48E-01 | ---      | 1.03E-01 | 16687    | -0.0683 | 0.0238  | 4.12E-03 | --       | 2.16E-02 |          |
| rs12970134 | 18         | 56035730 | a        | c      | 18803 | 0.1078  | 0.0297  | 8.05E-04 | +++++    | 1.16E-01 | 10327    | 0.0089  | 0.0374 | 8.13E-01 | ---      | 9.90E-02 | 19130    | -0.0696 | 0.0233  | 2.79E-03 | --       | 3.84E-02 |          |
| 277        | rs5954832  | 18       | 65474134 | DK6    | a     | 16655   | 0.1438  | 0.0366   | 8.70E-05 | +++++    | 9.02E-01 | 7860    | 0.0275 | 0.0512   | 5.91E-01 | -?       | 8.27E-01 | 22515   | -0.1045 | 0.0298   | 4.50E-04 | --       | 6.46E-02 |
| rs11660034 | 18         | 65475733 | DK6      | a      | 14633 | -0.1498 | 0.0368  | 4.71E-05 | ---+---  | 8.90E-01 | 7863     | -0.0251 | 0.0512 | 6.23E-01 | -?       | 7.88E-01 | 22496    | -0.1073 | 0.0299  | 3.29E-04 | --       | 4.80E-02 |          |
| rs4495886  | 18         | 65477133 | DK6      | t      | 14831 | 0.1549  | 0.0383  | 5.19E-05 | +++++    | 9.13E-01 | 7872     | 0.0233  | 0.0521 | 6.55E-01 | -?       | 8.82E-01 | 22703    | -0.1087 | 0.0309  | 4.26E-04 | --       | 4.18E-02 |          |
| 278        | rs2628125  | 18       | 70722593 | ZNF407 | a     | 16738   | -0.0496 | 0.0243   | 4.16E-02 | ---+---  | 1.13E-01 | 10330   | 0.0247 | 0.0285   | 3.95E-01 | ---      | 8.20E-01 | 27068   | -0.0185 | 0.0185   | 3.16E-01 | --       | 4.88E-02 |
| rs2554162  | 18         | 70722734 | ZNF407   | a      | 16999 | 0.0821  | 0.0223  | 4.44E-04 | +++++    | 9.90E-01 | 10331    | 0.0223  | 0.0285 | 4.33E-01 | ---      | 8.42E-01 | 27139    | -0.0403 | 0.018   | 2.56E-02 | --       | 4.57E-01 |          |
| rs8098151  | 18         | 70727962 | ZNF407   | t      | 14699 | -0.0811 | 0.0226  | 1.53E-03 | ---+---  | 9.67E-01 | 10345    | 0.0251  | 0.0284 | 3.78E-01 | ---      | 6.99E-01 | 25044    | -0.0385 | 0.019   | 7.82E-02 | --       | 5.48E-03 |          |
| rs2628123  | 18         | 70728913 | ZNF407   | a      | 18692 | -0.0809 | 0.0228  | 3.91E-04 | ---+---  | 9.88E-01 | 10323    | -0.0287 | 0.0285 | 3.14E-01 | ---      | 6.64E-01 | 29015    | -0.0381 | 0.0178  | 3.72E-02 | --       | 2.67E-03 |          |
| rs2554130  | 18         | 70744915 | ZNF407   | a      | 18646 | 0.0803  | 0.023   | 4.71E-04 | +++++    | 8.67E-01 | 10321    | 0.0242  | 0.0338 | 4.74E-01 | ---      | 1.28E-01 | 28967    | -0.0625 | 0.019   | 1.01E-03 | --       | 1.70E-01 |          |
| rs2628117  | 18         | 70746183 | ZNF407   | a      | 8843  | 0.088   | 0.0342  | 1.01E-02 | +++++    | 6.94E-01 | 10192    | 0.0288  | 0.0341 | 3.99E-01 | ---      | 1.68E-01 | 19035    | -0.0583 | 0.0241  | 1.57E-02 | --       | 2.20E-01 |          |
| 279        | rs12966258 | 18       | 74899539 |        | a     | 12704   | 0.096   | 0.0316   | 2.41E-03 | +++++    | 9.58E-01 | 10253   | -0.005 | 0.0313   | 8.73E-01 | ---      | 8.69E-02 | 22957   | -0.0545 | 0.0222   | 4.29E-02 | --       | 2.32E-02 |
| rs4247367  | 18         | 74903836 |          | a      | 12703 | 0.0968  | 0.0316  | 2.22E-03 | +++++    | 9.58E-01 | 10255    | -0.0052 | 0.0313 | 8.67E-01 | ---      | 8.70E-02 | 22958    | -0.0543 | 0.0222  | 4.16E-02 | --       | 2.28E-02 |          |
| rs1893571  | 18         | 74906352 |          | t      | 14740 | -0.0942 | 0.0288  | 1.08E-03 | ---+---  | 9.46E-01 | 10317    | -0.0327 | 0.0313 | 9.18E-01 | ---      | 7.12E-02 | 25057    | -0.0495 | 0.0228  | 1.94E-02 | --       | 2.20E-02 |          |
| rs12966045 | 18         | 74907827 |          | a      | 8638  | 0.1184  | 0.0368  | 1.29E-03 | +++++    | 9.13E-01 | 10317    | -0.0032 | 0.0313 | 9.18E-01 | ---      | 7.12E-02 | 25057    | -0.0495 | 0.0228  | 1.94E-02 | --       | 2.20E-02 |          |
| rs506774   | 18         | 74908769 |          | a      | 16689 | 0.0922  | 0.0256  | 3.10E-04 | +++++    | 9.80E-01 | 10315    | -0.0028 | 0.0311 | 9.29E-01 | ---      | 1.19E-01 | 27204    | -0.0538 | 0.0198  | 6.46E-03 | --       | 1.34E-02 |          |
| rs19790001 | 18         | 74913438 |          | t      | 14830 | -0.0831 | 0.0271  | 2.75E-03 | ---+---  | 9.70E-01 | 10309    | 0.007   | 0.0309 | 8.28E-01 | ---      | 1.09E-01 | 25189    | -0.0458 | 0.0206  | 5.67E-02 | --       | 4.35E-02 |          |
| rs12957405 | 18         | 74915134 |          | c      | 16338 | 0.094   | 0.028   | 7.74E-04 | +++++    | 9.78E-01 | 10347    | 0.0023  | 0.0313 | 9.41E-01 | ---      | 3.28E-02 | 26685    | -0.0532 | 0.0209  | 1.07E-02 | --       | 2.90E-02 |          |
| rs4567807  | 18         | 74919034 | ATP9B    | c      | 18677 | 0.0913  | 0.0258  | 3.94E-04 | +++++    | 9.87E-01 | 10343    | 0.0006  | 0.0313 | 9.85E-01 | ---      | 3.22E-02 | 29020    | -0.0546 |         |          |          |          |          |

|     |            |          |   |   |       |         |        |          |        |          |       |         |        |          |     |          |       |         |        |          |    |          |
|-----|------------|----------|---|---|-------|---------|--------|----------|--------|----------|-------|---------|--------|----------|-----|----------|-------|---------|--------|----------|----|----------|
|     | rs6036127  | 22393714 | t | c | 18766 | -0.0839 | 0.0236 | 3.84e-04 | ++++   | 1.56e-01 | 9938  | -0.0351 | 0.0294 | 2.32e-01 | ?   | 5.50e-01 | 28704 | -0.0648 | 0.0184 | 4.32e-04 | -- | 1.96e-01 |
|     | rs3952534  | 22395954 | c | g | 16709 | -0.0206 | 0.0252 | 4.15e-01 | +?+?   | 5.33e-02 | 9974  | -0.0444 | 0.0292 | 8.79e-01 | ?   | 8.83e-01 | 26683 | -0.0137 | 0.0191 | 4.73e-01 | -- | 6.75e-01 |
| 288 | rs6073383  | 42302978 | a | t | 12577 | -0.0934 | 0.0292 | 1.39e-03 | -?+?   | 4.11e-02 | 10291 | -0.0481 | 0.0288 | 9.44e-02 | ?   | 4.94e-01 | 22688 | -0.0704 | 0.0205 | 5.92e-04 | -- | 2.69e-01 |
|     | rs2867800  | 42307923 | a | c | 14532 | 0.0832  | 0.0267 | 1.86e-03 | +?+?+  | 3.98e-02 | 10327 | 0.0462  | 0.0287 | 1.08e-01 | +++ | 5.92e-01 | 24859 | 0.0666  | 0.0195 | 7.30e-04 | ++ | 3.45e-01 |
|     | rs4810415  | 42307923 | a | c | 18759 | -0.085  | 0.0229 | 2.04e-04 | +?+?+  | 1.17e-02 | 10356 | -0.0483 | 0.0289 | 9.50e-02 | --- | 7.09e-01 | 29115 | -0.0708 | 0.0179 | 7.91e-05 | -- | 3.20e-01 |
|     | rs7273969  | 42328183 | a | c | 18720 | 0.0856  | 0.0229 | 1.86e-04 | +?+?+  | 1.26e-02 | 10356 | 0.0483  | 0.0289 | 9.50e-02 | +++ | 7.09e-01 | 29076 | 0.0712  | 0.0179 | 7.26e-05 | ++ | 3.12e-01 |
|     | rs12481690 | 42329874 | a | g | 18759 | -0.086  | 0.0229 | 1.72e-04 | -----  | 1.37e-02 | 10356 | -0.0483 | 0.0289 | 9.50e-02 | --- | 7.09e-01 | 29115 | -0.0715 | 0.0179 | 6.85e-05 | -- | 3.07e-01 |
|     | rs4812810  | 42329946 | a | g | 16426 | -0.1083 | 0.0246 | 1.05e-05 | -----? | 1.73e-02 | 10356 | -0.049  | 0.0289 | 9.02e-02 | --- | 7.18e-01 | 26782 | -0.0834 | 0.0187 | 8.53e-06 | -- | 1.18e-01 |
|     | rs6017310  | 42329852 | a | g | 18747 | -0.085  | 0.0229 | 2.06e-04 | -----  | 1.05e-02 | 10362 | -0.0498 | 0.0289 | 8.50e-02 | --- | 7.02e-01 | 29109 | -0.0714 | 0.0179 | 6.91e-05 | -- | 3.40e-01 |
|     | rs1884607  | 42340956 | a | g | 18788 | -0.0831 | 0.0229 | 2.82e-04 | -----  | 9.28e-03 | 10361 | -0.0512 | 0.0289 | 7.64e-02 | --- | 7.20e-01 | 29149 | -0.0708 | 0.0179 | 8.00e-05 | -- | 3.87e-01 |
|     | rs2208064  | 42344736 | a | g | 18790 | -0.0832 | 0.0229 | 2.78e-04 | -----  | 9.37e-03 | 10362 | -0.0512 | 0.0289 | 7.64e-02 | --- | 7.20e-01 | 29152 | -0.0709 | 0.0179 | 7.89e-05 | -- | 3.86e-01 |
|     | rs2268090  | 42351181 | a | t | 18754 | -0.0835 | 0.0229 | 2.67e-04 | -----  | 8.76e-03 | 10349 | -0.0552 | 0.0289 | 5.67e-02 | --- | 5.90e-01 | 29103 | -0.0729 | 0.0179 | 5.25e-05 | -- | 4.43e-01 |
|     | rs7265147  | 42352171 | a | g | 18684 | 0.093   | 0.0231 | 5.53e-05 | +++++  | 7.62e-02 | 10347 | 0.043   | 0.0286 | 1.33e-01 | +++ | 5.98e-01 | 29031 | 0.0723  | 0.018  | 4.57e-05 | ++ | 1.74e-01 |
|     | rs6031503  | 42358335 | a | g | 18706 | -0.0924 | 0.0231 | 5.98e-05 | +++++  | 6.56e-02 | 10347 | -0.0407 | 0.0286 | 1.53e-01 | +++ | 5.62e-01 | 29053 | -0.0731 | 0.0179 | 5.76e-05 | ++ | 1.59e-01 |
|     | rs4812816  | 42362866 | a | c | 18697 | 0.0933  | 0.023  | 5.22e-05 | +++++  | 7.13e-02 | 10354 | 0.0437  | 0.0286 | 1.27e-01 | +++ | 6.13e-01 | 29051 | 0.0738  | 0.0179 | 3.81e-05 | ++ | 1.77e-01 |
|     | rs13045189 | 42367314 | a | g | 18726 | -0.0839 | 0.0229 | 2.55e-04 | -----  | 1.13e-02 | 10349 | -0.0496 | 0.0289 | 8.68e-02 | --- | 7.59e-01 | 29075 | -0.0707 | 0.0179 | 8.24e-05 | -- | 3.52e-01 |
|     | rs4812817  | 42367435 | a | g | 18680 | -0.093  | 0.0231 | 5.49e-05 | +++++  | 8.02e-02 | 10360 | -0.0395 | 0.0286 | 1.68e-01 | --- | 6.59e-01 | 29040 | -0.0719 | 0.018  | 6.34e-05 | -- | 1.46e-01 |
|     | rs13037113 | 42370171 | a | c | 18555 | -0.0949 | 0.0231 | 4.04e-05 | -----  | 8.91e-02 | 10361 | -0.0405 | 0.0289 | 1.61e-01 | --- | 6.67e-01 | 28916 | -0.0737 | 0.018  | 4.43e-05 | -- | 1.42e-01 |
|     | rs6031507  | 42375042 | a | c | 18688 | -0.0952 | 0.0231 | 3.64e-05 | -----  | 1.10e-01 | 10372 | -0.0193 | 0.0302 | 5.23e-01 | --- | 2.26e-01 | 28960 | -0.0672 | 0.0183 | 2.51e-02 | ++ | 4.59e-02 |
|     | rs6017317  | 42380380 | a | g | 18595 | -0.0981 | 0.0232 | 2.43e-05 | -----  | 1.17e-01 | 10237 | -0.0637 | 0.0369 | 8.42e-02 | --- | 5.09e-01 | 28832 | -0.0884 | 0.0196 | 6.84e-06 | -- | 4.30e-01 |
|     | rs11907772 | 42401240 | a | g | 12699 | 0.0921  | 0.0279 | 9.60e-04 | +?+?+  | 2.39e-01 | 7858  | 0.0186  | 0.0368 | 6.14e-01 | +?  | 2.46e-01 | 20557 | 0.0653  | 0.0222 | 3.33e-03 | ++ | 1.12e-01 |
|     | rs4812822  | 42404268 | a | c | 8843  | 0.0864  | 0.0346 | 1.26e-02 | ????+  | 1.56e-01 | 7487  | -0.012  | 0.0346 | 7.29e-01 | ??  | 1.00e+00 | 16330 | -0.0372 | 0.0245 | 1.28e-01 | ++ | 4.43e-02 |
|     | rs4812823  | 42404514 | a | g | 14823 | -0.0738 | 0.0256 | 3.90e-03 | -?+?+  | 6.02e-01 | 7481  | -0.03   | 0.0339 | 3.76e-01 | ??  | 1.00e+00 | 22304 | -0.0579 | 0.0204 | 6.06e-03 | ++ | 3.03e-01 |
|     | rs4812826  | 42405689 | a | g | 8843  | 0.074   | 0.0344 | 1.17e-02 | ????+  | 1.53e-01 | 9965  | 0.0439  | 0.0297 | 1.40e-01 | ??  | 8.11e-04 | 18808 | 0.0568  | 0.0225 | 1.16e-02 | ++ | 5.08e-01 |
| 289 | rs1126631  | 50688817 | a | c | 18693 | 0.0943  | 0.0265 | 3.65e-04 | +++++  | 8.99e-01 | 10305 | -0.021  | 0.0388 | 4.95e-01 | +++ | 7.04e-02 | 28998 | 0.0453  | 0.0201 | 2.43e-02 | ++ | 4.54e-03 |
|     | rs1916648  | 50691425 | a | c | 18671 | 0.0911  | 0.0265 | 5.78e-04 | +++++  | 9.84e-01 | 10305 | -0.0148 | 0.0307 | 6.30e-01 | +++ | 5.71e-02 | 28976 | 0.0509  | 0.0201 | 2.22e-02 | ++ | 9.02e-03 |
|     | rs1916647  | 50691463 | t | c | 18671 | -0.0911 | 0.0265 | 5.78e-04 | -----  | 9.84e-01 | 10306 | 0.0149  | 0.0307 | 6.26e-01 | --- | 6.23e-02 | 28977 | -0.0458 | 0.0201 | 2.23e-02 | ++ | 8.96e-03 |
|     | rs8124744  | 50695302 | a | g | 18511 | 0.086   | 0.0261 | 9.82e-04 | +++++  | 8.32e-01 | 10343 | -0.0144 | 0.0304 | 6.37e-01 | +++ | 4.29e-02 | 28854 | -0.0434 | 0.0198 | 2.84e-02 | ++ | 1.22e-02 |
|     | rs8126232  | 50695583 | a | g | 18586 | -0.0863 | 0.0261 | 9.25e-04 | -----  | 9.30e-01 | 10349 | 0.0107  | 0.0304 | 7.25e-01 | --- | 6.16e-02 | 28935 | -0.0451 | 0.0198 | 2.26e-02 | ++ | 1.55e-02 |
|     | rs6126634  | 50696649 | a | c | 18694 | -0.0842 | 0.0259 | 1.15e-03 | -----  | 8.59e-01 | 10354 | -0.0114 | 0.0304 | 7.09e-01 | --- | 7.48e-02 | 29048 | -0.0401 | 0.0197 | 2.57e-02 | ++ | 1.67e-02 |
|     | rs13041661 | 50697111 | a | g | 18695 | 0.0805  | 0.0258 | 1.81e-03 | +++++  | 8.55e-01 | 10354 | -0.0104 | 0.0303 | 7.30e-01 | +++ | 1.00e-01 | 29049 | 0.0423  | 0.0196 | 3.13e-02 | ++ | 2.24e-02 |
|     | rs6202217  | 50698164 | t | c | 18650 | 0.0818  | 0.0257 | 1.46e-03 | +++++  | 8.41e-01 | 10325 | -0.0122 | 0.0303 | 6.89e-01 | +++ | 1.08e-01 | 28975 | 0.0426  | 0.0196 | 2.99e-02 | ++ | 1.82e-02 |
|     | rs6062829  | 50700220 | a | g | 18636 | 0.0812  | 0.0257 | 1.55e-03 | +++++  | 8.00e-01 | 10308 | -0.0118 | 0.0302 | 6.97e-01 | +++ | 9.35e-02 | 28944 | 0.0421  | 0.0196 | 3.13e-02 | ++ | 1.90e-02 |
|     | rs6062920  | 50701972 | a | g | 18657 | 0.0827  | 0.0257 | 1.30e-03 | +++++  | 7.84e-01 | 10297 | -0.0109 | 0.0307 | 7.22e-01 | +++ | 7.37e-02 | 28954 | 0.0401  | 0.0197 | 2.51e-02 | ++ | 1.94e-02 |
| 290 | rs1276430  | 50930012 | a | g | 14831 | -0.1746 | 0.0464 | 1.85e-04 | -?+?+  | 2.72e-01 | 10324 | -0.0121 | 0.0509 | 8.12e-01 | --- | 9.98e-01 | 23155 | -0.1003 | 0.0343 | 3.44e-03 | ++ | 1.90e-02 |
|     | rs11699823 | 50938819 | a | g | 16679 | -0.1529 | 0.0476 | 1.31e-03 | -?+?+  | 6.45e-01 | 10333 | 0.0051  | 0.0515 | 9.22e-01 | --- | 7.16e-01 | 27012 | -0.0801 | 0.035  | 2.19e-02 | ++ | 2.43e-02 |
|     | rs13039710 | 50944179 | a | c | 16706 | 0.1528  | 0.0474 | 1.27e-03 | +?+?+  | 6.83e-01 | 10343 | -0.0013 | 0.0516 | 9.79e-01 | +++ | 6.16e-01 | 27049 | 0.0823  | 0.0349 | 1.84e-02 | ++ | 2.79e-02 |
| 291 | rs6069971  | 55073362 | c | g | 14821 | -0.0663 | 0.0636 | 2.97e-01 | -?+?+  | 1.55e-03 | 10346 | 0.0354  | 0.0666 | 5.95e-01 | --- | 3.91e-01 | 25167 | -0.0178 | 0.046  | 6.99e-01 | ++ | 2.69e-01 |
|     | rs6069972  | 55073413 | c | g | 14822 | -0.0663 | 0.0636 | 2.97e-01 | -?+?+  | 1.55e-03 | 10346 | 0.001   | 0.098  | 9.92e-01 | --- | 3.60e-01 | 25168 | -0.0464 | 0.0533 | 3.85e-01 | ++ | 5.65e-01 |
|     | rs6069973  | 55073780 | c | g | 14823 | 0.2355  | 0.0636 | 2.11e-04 | +?+?+  | 1.70e-01 | 10337 | -0.0528 | 0.0669 | 4.30e-01 | --- | 3.08e-01 | 25160 | 0.0986  | 0.0461 | 3.24e-02 | ++ | 1.79e-03 |
|     | rs6069974  | 55074698 | t | c | 14829 | 0.0659  | 0.0634 | 2.99e-01 | +?+?+  | 1.24e-01 | 10342 | -0.0252 | 0.0663 | 7.04e-01 | --- | 3.90e-01 | 25171 | 0.0224  | 0.0458 | 6.25e-01 | ++ | 3.21e-01 |
|     | rs6069975  | 55074752 | a | g | 12795 | -0.0928 | 0.0672 | 1.68e-01 | -?+?+  | 1.17e-01 | 10346 | 0.0125  | 0.0978 | 8.98e-01 | --- | 3.78e-01 | 23141 | -0.059  | 0.0554 | 2.87e-01 | ++ | 3.75e-01 |
|     | rs6025344  | 55075405 | a | g | 14822 | -0.0661 | 0.0636 | 2.98e-01 | -?+?+  | 1.42e-03 | 10345 | 0.0086  | 0.0979 | 9.30e-01 | --- | 3.87e-01 | 25167 | -0.0439 | 0.0533 | 4.10e-01 | ++ | 5.22e-01 |
|     | rs6025345  | 55075676 | a | g | 14819 | -0.0659 | 0.0636 | 3.00e-01 | -?+?+  | 1.40e-03 | 10345 | 0.0336  | 0.0666 | 6.14e-01 | +++ | 3.96e-01 | 25164 | -0.0184 | 0.046  | 6.99e-01 | ++ | 2.80e-01 |
|     | rs5099432  | 55093252 | a | t | 14779 | -0.0801 | 0.0582 | 8.90e-01 | -?+?+  | 3.56e-03 | 10302 | 0.022   | 0.0623 | 7.25e-01 | --- | 5.87e-01 | 25081 | 0.0505  | 0.0425 | 8.89e-01 | ++ | 7.24e-01 |
|     | rs259984   | 57200438 | a | g | 16632 | 0.0924  | 0.0263 | 4.52e-04 | +?+?+  | 3.69e-01 | 10328 | 0.0097  | 0.032  | 7.63e-01 | --- | 9.88e-01 | 26960 | 0.0591  | 0.0203 | 3.65e-03 | ++ | 4.59e-02 |
|     | rs260008   | 57204799 | a | c | 16678 | 0.0927  | 0.0264 | 4.48e-04 | +?+?+  | 3.93e-01 | 10350 | 0.0123  | 0.0362 | 7.35e-01 | --- | 1.00e+00 | 27028 | 0.0648  | 0.0213 | 2.39e-03 | ++ | 7.27e-02 |
|     | rs4603838  |          |   |   |       |         |        |          |        |          |       |         |        |          |     |          |       |         |        |          |    |          |

Supplementary Table 5. Nineteen SNPs taken forward to stage 3 for *de novo* replication and their DIAGRAM+ lookup results

| SNP                              | Chr | Nearby gene               | Risk allele | Other allele | RAF (HapMap JPT/CHB) | Stage 1 (discovery)                   | Stage 2 (in silico replication)      | Stage 3 (de novo replication)          | Combined (stage 1+2+3)                 | DIAGRAM+                              |                  |          |                    |
|----------------------------------|-----|---------------------------|-------------|--------------|----------------------|---------------------------------------|--------------------------------------|----------------------------------------|----------------------------------------|---------------------------------------|------------------|----------|--------------------|
|                                  |     |                           |             |              |                      | P-value                               | P-value                              | P-value                                | P-value                                | RAF (HapMap CEU)                      | OR (CI)          | P-value  | power <sup>§</sup> |
|                                  |     |                           |             |              |                      | up to 6,952 cases and 11,865 controls | up to 5,843 cases and 4,574 controls | up to 12,284 cases and 13,172 controls | up to 25,079 cases and 29,611 controls | up to 8,130 cases and 38,987 controls |                  |          |                    |
| <b>Replicated in Stage 3</b>     |     |                           |             |              |                      |                                       |                                      |                                        |                                        |                                       |                  |          |                    |
| rs831571                         | 3   | <i>PSMD6</i>              | c           | t            | 0.61                 | 4.85E-06                              | 4.46E-02                             | 1.41E-05                               | 8.41E-11                               | 0.76                                  | 1.02 (0.97-1.07) | 4.45E-01 | 0.16               |
| rs6815464 <sup>†</sup>           | 4   | <i>MAEA</i>               | c           | g            | 0.58                 | 8.21E-04                              | 3.67E-05                             | 4.15E-15                               | 1.57E-20                               | 0.97                                  | 1.19 (1.05-1.36) | 6.56E-03 | 0.91               |
| rs9470794                        | 6   | <i>ZFAND3</i>             | c           | t            | 0.27                 | 1.45E-04                              | 1.48E-02                             | 3.20E-06                               | 2.06E-10                               | 0.14                                  | 0.97 (0.90-1.04) | 4.00E-01 | 0.23               |
| rs1535500 <sup>‡</sup>           | 6   | <i>KCNK16</i>             | t           | g            | 0.42                 | 5.34E-06                              | 3.33E-02                             | 3.50E-03                               | 2.30E-08                               | 0.48                                  | 1.00 (0.96-1.04) | 9.21E-01 | 0.05               |
| rs6467136                        | 7   | <i>GCC1-PAX4</i>          | g           | a            | 0.79                 | 6.47E-05                              | 2.09E-03                             | 2.31E-05                               | 4.96E-11                               | 0.56                                  | 0.99 (0.95-1.03) | 4.89E-01 | 0.09               |
| rs7041847                        | 9   | <i>GLIS3</i>              | a           | g            | 0.41                 | 1.29E-04                              | 2.20E-03                             | 2.89E-09                               | 1.99E-14                               | 0.54                                  | 1.04 (1.00-1.08) | 6.43E-02 | 0.62               |
| rs17797882                       | 16  | <i>WWOX</i>               | t           | c            | 0.32                 | 1.76E-04                              | 1.21E-02                             | 1.61E-02                               | 9.49E-07                               | 0.02                                  | 1.20 (0.95-1.52) | 1.22E-01 | 0.87               |
| rs16955379*                      | 16  | <i>CMIP</i>               | c           | t            | 0.8                  | 2.20E-05                              | 6.59E-03                             | 2.19E-02                               | 2.84E-07                               | 0.99                                  | 1.20 (1.01-1.42) | 3.33E-02 | 0.52               |
| rs3786897                        | 19  | <i>PEPD</i>               | a           | g            | 0.56                 | 3.74E-06                              | 1.28E-01                             | 5.46E-04                               | 1.30E-08                               | 0.6                                   | 1.02 (0.98-1.06) | 3.61E-01 | 0.2                |
| rs6017317                        | 20  | <i>FITM2-R3HDML-HNF4A</i> | g           | t            | 0.48                 | 2.43E-05                              | 8.42E-02                             | 3.96E-07                               | 1.12E-11                               | 0.18                                  | 1.07 (1.01-1.13) | 1.47E-02 | 0.86               |
| <b>Not replicated in Stage 3</b> |     |                           |             |              |                      |                                       |                                      |                                        |                                        |                                       |                  |          |                    |
| rs1027700                        | 1   | <i>ATF6</i>               | a           | t            | 0.32                 | 3.47E-05                              | 8.97E-04                             | 7.01E-01                               | 6.16E-04                               | 0.25                                  | 1.01 (0.97-1.05) | 6.36E-01 | 0.08               |
| rs6441806                        | 3   | <i>ABHD5</i>              | t           | c            | 0.64                 | 1.22E-06                              | 7.26E-02                             | 9.16E-01                               | 3.57E-04                               | 0.05                                  | 0.99 (0.95-1.04) | 7.74E-01 | 0.06               |
| rs6807248                        | 3   | <i>TIPARP</i>             | c           | t            | 0.17                 | 7.56E-06                              | 6.61E-02                             | 6.81E-01                               | 1.55E-04                               | 0.23                                  | 1.02 (0.97-1.06) | 4.95E-01 | 0.16               |
| rs4927868                        | 3   | <i>TFRC</i>               | t           | c            | 0.38                 | 2.67E-04                              | 1.13E-02                             | 5.80E-01                               | 6.44E-05                               | 0.6                                   | 0.95 (0.84-1.08) | 4.40E-01 | 0.83               |
| rs1265099                        | 6   | <i>PSORS1C1</i>           | g           | a            | 0.49                 | 2.82E-04                              | 1.15E-02                             | 3.09E-01                               | 9.71E-04                               | 0.61                                  | 1.03 (0.99-1.08) | 1.19E-01 | 0.39               |
| rs2191651                        | 6   | <i>PRIM2</i>              | g           | a            | 0.52                 | 3.65E-05                              | 5.23E-03                             | 6.87E-01                               | 1.52E-04                               | 0.33                                  | 1.01 (0.96-1.06) | 7.66E-01 | 0.08               |
| rs17715285                       | 7   | <i>GCC1</i>               | t           | c            | 0.79                 | 2.14E-04                              | 8.38E-03                             | 2.88E-01                               | 5.93E-06                               | 0.47                                  | 0.98 (0.94-1.02) | 3.95E-01 | 0.22               |
| rs10282790                       | 8   | <i>CNBD1</i>              | g           | t            | 0.19                 | 1.36E-04                              | 1.55E-02                             | 5.43E-02                               | 4.25E-03                               | 0.17                                  | 1.01 (0.97-1.06) | 5.64E-01 | 0.07               |
| rs4993062                        | 16  | <i>ARHGAP17-LCMT1</i>     | a           | g            | 0.13                 | 3.32E-05                              | 1.31E-02                             | 5.44E-01                               | 2.93E-04                               | 0.23                                  | 0.99 (0.95-1.04) | 7.14E-01 | 0.08               |

\*Proxy SNP, rs9930117 ( $r^2=1$ ), was genotyped in the stage3 CAGE study. Proxy SNPs used for DIAGRAM+ lookup are <sup>†</sup>rs11247991 ( $r^2=0.96$ ) and <sup>‡</sup>rs3734618 BBJ ( $r^2=1$ ). <sup>§</sup>The power was estimated given the 8,130 cases/38,987 controls, DIAGRAM+ ORs, T2D prevalency of 10% and RAF in HapMap (CEU) for  $\alpha=0.05$ . RAF, risk allele frequency. NA, not available.

**Supplementary Table 6. Results of association analyses for T2D with and without the adjustment for BMI.** The primary association of each T2D locus detected in this study was adjusted with BMI.

| SNP       | Chr | Position (bp) | Nearby gene               | Risk allele | Other allele | Combined (stage 1+2+3) before BMI adjustment |          | Combined (stage 1+2+3) after BMI adjustment |          |
|-----------|-----|---------------|---------------------------|-------------|--------------|----------------------------------------------|----------|---------------------------------------------|----------|
|           |     |               |                           |             |              | OR (CI)                                      | P-value  | OR (CI)                                     | P-value  |
| rs6815464 | 4   | 1,299,901     | <i>MAEA</i>               | c           | g            | 1.13 (1.10-1.16)                             | 1.57E-20 | 1.14 (1.11-1.18)                            | 8.70E-22 |
| rs7041847 | 9   | 4,277,466     | <i>GLIS3</i>              | a           | g            | 1.10 (1.07-1.13)                             | 1.99E-14 | 1.11 (1.08-1.14)                            | 6.27E-14 |
| rs6017317 | 20  | 42,380,380    | <i>FITM2-R3HDML-HNF4A</i> | g           | t            | 1.09 (1.07-1.12)                             | 1.12E-11 | 1.09 (1.06-1.12)                            | 2.27E-10 |
| rs6467136 | 7   | 126,952,194   | <i>GCC1-PAX4</i>          | g           | a            | 1.11 (1.07-1.14)                             | 4.96E-11 | 1.11 (1.07-1.14)                            | 3.00E-10 |
| rs831571  | 3   | 64,023,337    | <i>PSMD6</i>              | c           | t            | 1.09 (1.06-1.12)                             | 8.41E-11 | 1.08 (1.06-1.11)                            | 4.15E-09 |
| rs9470794 | 6   | 38,087,158    | <i>ZFAND3</i>             | c           | t            | 1.12 (1.08-1.16)                             | 2.06E-10 | 1.12 (1.08-1.16)                            | 2.22E-09 |
| rs3786897 | 19  | 38,584,848    | <i>PEPD</i>               | a           | g            | 1.10 (1.07-1.14)                             | 1.30E-08 | 1.12 (1.08-1.16)                            | 1.28E-09 |
| rs1535500 | 6   | 39,392,028    | <i>KCNK16</i>             | t           | g            | 1.08 (1.05-1.11)                             | 2.30E-08 | 1.09 (1.06-1.12)                            | 3.17E-09 |

\*Proxy SNP, rs9930117 ( $r^2=1$ ), was genotyped in the stage3 CAGE study. Sample size is up to 25,079 cases and 29,611 controls.

**Supplementary Table 7. List of regions contained in the 38 loci identified by genome-wide association meta-analysis (using published PubMed abstracts prior to December, 2006) with the gene identified by GRAIL analysis.** GRAIL  $P_{\text{Region}}$ -value column presents the best significant  $P_{\text{Gene}}$ -value adjusted for the multiple comparisons within a locus with at least one gene. The right panel presents the keywords over-described in PubMed abstracts featuring the most connected genes functionally.

| REGION    | GRAIL $P_{\text{Region}}$ -value | CANDIDATE GENE  | Keywords Describing Functional Connections |
|-----------|----------------------------------|-----------------|--------------------------------------------|
| region_18 | 1.52E-06                         | <i>HNF1B</i>    | 'insulin'                                  |
| region_7  | 8.54E-06                         | <i>CDKN2A</i>   | 'diabetes'                                 |
| region_20 | 2.05E-05                         | <i>IDE</i>      | 'pancreatic'                               |
| region_15 | 2.07E-05                         | <i>GCKR</i>     | 'nuclear'                                  |
| region_19 | 2.17E-05                         | <i>HNF4A</i>    | 'glucose'                                  |
| region_8  | 2.96E-05                         | <i>CDKN2B</i>   | 'beta'                                     |
| region_22 | 0.001055                         | <i>IRS1</i>     | 'pancreas'                                 |
| region_24 | 0.001124                         | <i>KCNJ11</i>   | 'hepatocyte'                               |
| region_2  | 0.003171                         | <i>FAM148A</i>  | 'ppargamma'                                |
| region_16 | 0.003893                         | <i>GLIS3</i>    | 'channel'                                  |
| region_36 | 0.005116                         | <i>TCF7L2</i>   | 'talk'                                     |
| region_29 | 0.006847                         | <i>PPARG</i>    | 'kappab'                                   |
| region_39 | 0.009422                         | <i>WWOX</i>     | 'catenin'                                  |
| region_37 | 0.021412                         | <i>TP53INP1</i> | 'endothelial'                              |
| region_17 | 0.031825                         | <i>HHEX</i>     | 'acute'                                    |
| region_25 | 0.03307                          | <i>KCNK16</i>   | 'factor'                                   |
| region_26 | 0.033255                         | <i>KCNQ1</i>    | 'promoter'                                 |
| region_3  | 0.059807                         | <i>FAM148B</i>  | 'zinc'                                     |
| region_35 | 0.076044                         | <i>SLC30A8</i>  | 'tumor'                                    |
| region_33 | 0.111309                         | <i>PTPRD</i>    | 'mutations'                                |
| region_1  | 0.209535                         | <i>BCL11A</i>   |                                            |
| region_11 | 0.33995                          | <i>DGKB</i>     |                                            |
| region_31 | 0.399287                         | <i>PROX1</i>    |                                            |
| region_21 | 0.410371                         | <i>IGF2BP2</i>  |                                            |
| region_30 | 0.419303                         | <i>PRC1</i>     |                                            |
| region_38 | 0.573858                         | <i>UBE2E2</i>   |                                            |
| region_23 | 0.630808                         | <i>JAZF1</i>    |                                            |
| region_14 | 0.694944                         | <i>GCC1</i>     |                                            |
| region_5  | 0.734563                         | <i>CDC123</i>   |                                            |
| region_4  | 0.744804                         | <i>CAMK1D</i>   |                                            |
| region_27 | 0.74898                          | <i>MAEA</i>     |                                            |
| region_32 | 0.823088                         | <i>PSMD6</i>    |                                            |
| region_28 | 0.84532                          | <i>PEPD</i>     |                                            |
| region_40 | 0.936323                         | <i>ZFAND3</i>   |                                            |
| region_10 | 0.958475                         | <i>CMIP</i>     |                                            |
| region_6  | 1                                | <i>CDKAL1</i>   |                                            |
| region_9  | 1                                | <i>CENTD2</i>   |                                            |
| region_13 | 1                                | <i>FTO</i>      |                                            |
| region_12 | N/A                              |                 |                                            |
| region_34 | N/A                              |                 |                                            |

**Supplementary Table 8. List of connection results from the GRAIL analysis for selected genes ( $P_{\text{Gene}} < 0.05$ ) in Supplementary Table 7. GRAIL  $P_{\text{Gene}}$ -values are the results for the test of the gene itself, and thus are not adjusted for the number of genes tested within a locus. Analysis results present connections between previously known diabetes associated genes based on their prior literature.**

| GENE            | GRAIL $P_{\text{Gene}}$ value | SELECTED SIMILAR GENES (Rank in parantheses)                                                                                                                                                        |
|-----------------|-------------------------------|-----------------------------------------------------------------------------------------------------------------------------------------------------------------------------------------------------|
| <i>HNF1B</i>    | 1.52E-06                      | HNF4A(3), GCKR(98), TCF7L2(111), GLIS3(224), PPARG(340), PROX1(355), PEPD(389), FAM148B(412), WWOX(433), HHEX(474), CDKN2A(608), FAM148A(652), IRS1(1463), KCNJ11(1465), CDKN2B(1732), CAMK1D(1993) |
| <i>CDKN2A</i>   | 8.54E-06                      | CDKN2B(1), WWOX(18), TP53INP1(64), CENTD2(320), PEPD(349), HNF1B(460), TCF7L2(606), PPARG(1059), PSMD6(1245), PTPRD(1299), BCL11A(1414), PROX1(1479), CAMK1D(1482), HNF4A(1663)                     |
| <i>IDE</i>      | 2.05E-05                      | IRS1(5), PEPD(50), PPARG(160), SLC30A8(278), KCNJ11(367), HNF4A(378), HNF1B(407), CAMK1D(670), GCKR(681), TCF7L2(702), WWOX(1202), PSMD6(1437)                                                      |
| <i>GCKR</i>     | 2.07E-05                      | HNF4A(18), HNF1B(24), PEPD(138), IRS1(147), KCNJ11(177), PPARG(196), IDE(581), WWOX(834), TCF7L2(896), CAMK1D(1021), GLIS3(1512), PROX1(1733)                                                       |
| <i>HNF4A</i>    | 2.17E-05                      | HNF1B(3), GCKR(85), TCF7L2(121), PPARG(127), PROX1(348), HHEX(394), PEPD(575), WWOX(822), IRS1(833), CAMK1D(1138), GLIS3(1161), BCL11A(1497), KCNJ11(1717)                                          |
| <i>CDKN2B</i>   | 2.96E-05                      | CDKN2A(1), WWOX(29), TP53INP1(273), BCL11A(401), PEPD(407), JAZF1(462), CAMK1D(652), TCF7L2(751), HNF1B(863), PROX1(1039), HNF4A(1521), PTPRD(1623), PSMD6(1807), PPARG(1984)                       |
| <i>IRS1</i>     | 0.001055                      | IDE(90), PPARG(102), KCNJ11(354), HNF4A(472), SLC30A8(609), TCF7L2(623), HNF1B(748), CAMK1D(807), WWOX(830), PEPD(888), IGF2BP2(902), GCKR(922)                                                     |
| <i>KCNJ11</i>   | 0.0011244                     | KCNQ1(103), IRS1(229), KCNK16(267), PPARG(365), HNF1B(376), HNF4A(395), GCKR(491), IDE(655), PEPD(782), TCF7L2(828), SLC30A8(1790), WWOX(1994)                                                      |
| <i>FAM148A</i>  | 0.0031708                     | FAM148B(1), HNF1B(64), HNF4A(492), CAMK1D(747), TP53INP1(1040), PPARG(1327)                                                                                                                         |
| <i>GLIS3</i>    | 0.003893                      | HNF1B(174), ZFAND3(196), JAZF1(383), SLC30A8(403), HNF4A(500), BCL11A(611), PROX1(694), CAMK1D(802), HHEX(952), WWOX(1174), PEPD(1286), TCF7L2(1646)                                                |
| <i>TCF7L2</i>   | 0.0051165                     | HNF4A(185), HNF1B(192), WWOX(344), PPARG(505), HHEX(524), PROX1(634), CAMK1D(756), CDKN2A(810), PEPD(1009), IRS1(1058), CDKN2B(1378), IGF2BP2(1877), BCL11A(1921)                                   |
| <i>PPARG</i>    | 0.0068465                     | IRS1(71), HNF4A(142), HNF1B(371), TCF7L2(451), WWOX(531), PEPD(683), KCNJ11(1125), CDKN2A(1187), CAMK1D(1326), IDE(1536), GCKR(1878)                                                                |
| <i>WWOX</i>     | 0.0094217                     | CDKN2A(50), TP53INP1(112), CDKN2B(167), PTPRD(514), PEPD(650), PROX1(1311), CAMK1D(1440), TCF7L2(1454), BCL11A(1847)                                                                                |
| <i>TP53INP1</i> | 0.0214116                     | WWOX(39), CDKN2A(82), CDKN2B(425), CAMK1D(662), PEPD(1009), PROX1(1243), CDC123(1946)                                                                                                               |
| <i>HHEX</i>     | 0.0318255                     | PROX1(97), HNF4A(420), HNF1B(492), TCF7L2(496), BCL11A(614), CAMK1D(1140), WWOX(1253), PEPD(1295), GLIS3(1474)                                                                                      |
| <i>KCNK16</i>   | 0.0330698                     | KCNJ11(74), KCNQ1(130), CENTD2(514), GLIS3(686), CAMK1D(889), PEPD(1010), SLC30A8(1657)                                                                                                             |
| <i>KCNQ1</i>    | 0.0332554                     | KCNJ11(78), PEPD(350), KCNK16(496), HNF1B(597), CAMK1D(757), CDKN2A(1101), WWOX(1109), GLIS3(1652), PROX1(1662), HNF4A(1673)                                                                        |



**Supplementary Table 9. eQTL analysis results showing the suggestive evidence of cis-association ( $P = 5 \times 10^{-2}$ ) between each lead SNP and genes within 1Mb of the lead SNP.** The A1 allele listed in the table is the reference/effect allele. eQTL data in 776 adipose tissues, 667 skin tissues and 778 LCLs were available from the MuTHER consortium. The cis-association was examined by the linear regression analysis for the additive effect of SNP. All data were analyzed in genABEL and probABEL. Genome-wide FDR of 1% for a multiple-testing correction corresponds to a P-value threshold of  $5.06 \times 10^{-5}$  in adipose,  $3.81 \times 10^{-5}$  in skin and  $7.80 \times 10^{-5}$  in LCL.

| Locus         | Lead SNP   | Chr | PROBE_Illumina_V3 | Gene            | TSS       | TSE       | INFO | SNP_Coor  | A1 | Freq1 | Adipose |        |            | Skin    |        |            | LCL     |        |            |
|---------------|------------|-----|-------------------|-----------------|-----------|-----------|------|-----------|----|-------|---------|--------|------------|---------|--------|------------|---------|--------|------------|
|               |            |     |                   |                 |           |           |      |           |    |       | beta    | se     | $P_{eQTL}$ | beta    | se     | $P_{eQTL}$ | beta    | se     | $P_{eQTL}$ |
| <i>PSMD6</i>  | rs831571   | 3   | ILMN_1674559      | <i>FLJ44379</i> | 63624416  | 63624465  | 1    | 64023337  | T  | 0.197 | 0.0079  | 0.0068 | 2.46E-01   | 0.0027  | 0.0084 | 7.49E-01   | -0.0132 | 0.0062 | 3.40E-02   |
| <i>ZFAND3</i> | rs9470794  | 6   | ILMN_1763775      | <i>DNAH8</i>    | 38798529  | 39106545  | 0.97 | 38214822  | T  | 0.906 | -0.0030 | 0.0084 | 7.21E-01   | -0.0250 | 0.0097 | 1.00E-02   | 0.0053  | 0.0097 | 5.85E-01   |
|               |            | 6   | ILMN_1651535      | <i>TMEM217</i>  | 37287932  | 37333391  | 0.97 | 38214822  | T  | 0.906 | 0.0169  | 0.0079 | 3.35E-02   | 0.0031  | 0.0089 | 7.28E-01   | 0.0181  | 0.0135 | 1.80E-01   |
| <i>KCNK16</i> | rs1535500  | 6   | ILMN_1732271      | <i>BTBD9</i>    | 38244204  | 38715902  | 0.97 | 38214822  | T  | 0.906 | -0.0252 | 0.0097 | 9.15E-03   | -0.0026 | 0.0112 | 8.13E-01   | 0.0044  | 0.0099 | 6.59E-01   |
|               |            | 6   | ILMN_1766918      | <i>KCNK5</i>    | 39264724  | 39305229  | 0.99 | 39392028  | T  | 0.486 | 0.0051  | 0.0060 | 3.96E-01   | 0.0628  | 0.0256 | 1.42E-02   | -0.0091 | 0.0102 | 3.70E-01   |
|               |            | 6   | ILMN_1717702      | <i>KCNK17</i>   | 39374754  | 39390214  | 0.99 | 39392028  | T  | 0.486 | -0.0028 | 0.0059 | 6.33E-01   | -0.0137 | 0.0060 | 2.28E-02   | -0.0060 | 0.0058 | 3.03E-01   |
|               |            | 6   | ILMN_1702177      | <i>GLO1</i>     | 38751679  | 38778930  | 0.99 | 39392028  | T  | 0.486 | -0.0043 | 0.0166 | 7.97E-01   | -0.0546 | 0.0249 | 2.83E-02   | 0.0159  | 0.0115 | 1.65E-01   |
|               |            | 6   | ILMN_1716728      | <i>C6orf64</i>  | 39179817  | 39190843  | 0.99 | 39392028  | T  | 0.486 | -0.0125 | 0.0162 | 4.39E-01   | 0.0334  | 0.0164 | 4.15E-02   | 0.0176  | 0.0108 | 1.01E-01   |
| <i>GCC1</i>   | rs6467136  | 6   | ILMN_1763775      | <i>DNAH8</i>    | 38798529  | 39106545  | 0.99 | 39392028  | T  | 0.486 | 0.0109  | 0.0051 | 3.18E-02   | -0.0025 | 0.0058 | 6.66E-01   | 0.0024  | 0.0059 | 6.85E-01   |
|               |            | 7   | ILMN_1689635      | <i>FSCN3</i>    | 127020924 | 127029079 | 0.98 | 126952194 | G  | 0.525 | 0.0056  | 0.0046 | 2.23E-01   | 0.0126  | 0.0048 | 8.64E-03   | 0.0072  | 0.0046 | 1.17E-01   |
|               |            | 7   | ILMN_1794846      | <i>LRRC4</i>    | 127454359 | 127458238 | 0.98 | 126952194 | G  | 0.525 | -0.0068 | 0.0057 | 2.30E-01   | -0.0116 | 0.0056 | 3.74E-02   | -0.0021 | 0.0064 | 7.44E-01   |
|               |            | 7   | ILMN_1729212      | <i>GRM8</i>     | 125865887 | 126670805 | 0.98 | 126952194 | G  | 0.525 | -0.0019 | 0.0043 | 6.65E-01   | 0.0086  | 0.0049 | 7.88E-02   | 0.0102  | 0.0177 | 5.64E-01   |
|               |            | 7   | ILMN_1690343      | <i>IMPDH1</i>   | 127819566 | 127837272 | 0.98 | 126952194 | G  | 0.525 | -0.0136 | 0.0056 | 1.58E-02   | -0.0057 | 0.0060 | 3.44E-01   | -0.0020 | 0.0082 | 8.09E-01   |
| <i>GLIS3</i>  | rs7041847  | 7   | ILMN_1659990      | <i>C7orf68</i>  | 127883119 | 127885708 | 0.98 | 126952194 | G  | 0.525 | 0.0509  | 0.0187 | 6.51E-03   | -0.0083 | 0.0158 | 6.00E-01   | -0.0013 | 0.0270 | 9.61E-01   |
|               |            | 9   | ILMN_1693427      | <i>GLIS3</i>    | 3814127   | 4290035   | 1    | 4277466   | G  | 0.502 | -0.0001 | 0.0059 | 9.83E-01   | -0.0042 | 0.0062 | 4.99E-01   | -0.0145 | 0.0058 | 1.18E-02   |
|               |            | 9   | ILMN_2238640      | <i>RFX3</i>     | 3214646   | 3515983   | 1    | 4277466   | G  | 0.502 | 0.0108  | 0.0047 | 2.29E-02   | -0.0020 | 0.0048 | 6.83E-01   | 0.0072  | 0.0049 | 1.46E-01   |
| <i>CMIP</i>   | rs16955379 | 9   | ILMN_2402600      | <i>GLIS3</i>    | 3814127   | 4142183   | 1    | 4277466   | G  | 0.502 | 0.0083  | 0.0078 | 2.88E-01   | 0.0002  | 0.0067 | 9.81E-01   | -0.0304 | 0.0098 | 1.87E-03   |
|               |            | 16  | ILMN_1708103      | <i>GAN</i>      | 79906071  | 79971302  | 0.8  | 80046874  | T  | 0.015 | -0.0235 | 0.0227 | 3.02E-01   | -0.0084 | 0.0258 | 7.45E-01   | -0.0769 | 0.0270 | 4.35E-03   |
|               |            | 16  | ILMN_1772540      | <i>ATMIN</i>    | 79626958  | 79638452  | 0.8  | 80046874  | T  | 0.015 | 0.1322  | 0.0471 | 5.02E-03   | -0.0174 | 0.0656 | 7.91E-01   | -0.0925 | 0.0568 | 1.04E-01   |
| <i>PEPD</i>   | rs3786897  | 16  | ILMN_1697317      | <i>DYNLRB2</i>  | 79132354  | 79142042  | 0.8  | 80046874  | T  | 0.015 | -0.0911 | 0.0404 | 2.43E-02   | -0.0084 | 0.0581 | 8.85E-01   | 0.0137  | 0.0356 | 7.01E-01   |
|               |            | 19  | ILMN_1675172      | <i>RGS9BP</i>   | 37858152  | 37861046  | 0.94 | 38584848  | G  | 0.438 | -0.0064 | 0.0045 | 1.55E-01   | -0.0134 | 0.0073 | 6.75E-02   | -0.0140 | 0.0046 | 2.37E-03   |
|               |            | 19  | ILMN_1794063      | <i>ANKRD27</i>  | 37779746  | 37857942  | 0.94 | 38584848  | G  | 0.438 | 0.0143  | 0.0060 | 1.71E-02   | 0.0073  | 0.0064 | 2.53E-01   | 0.0067  | 0.0144 | 6.41E-01   |
| <i>HNF4A</i>  | rs6017317  | 19  | ILMN_1717674      | <i>PEPD</i>     | 38569694  | 38704639  | 0.94 | 38584848  | G  | 0.438 | -0.1168 | 0.0209 | 2.14E-08   | -0.0182 | 0.0204 | 3.74E-01   | 0.0194  | 0.0169 | 2.51E-01   |
|               |            | 20  | ILMN_1713752      | <i>SERINC3</i>  | 42561314  | 42584140  | 0.99 | 42380380  | T  | 0.843 | 0.0053  | 0.0074 | 4.76E-01   | 0.0187  | 0.0076 | 1.41E-02   | 0.0028  | 0.0086 | 7.43E-01   |
|               |            | 20  | ILMN_1779974      | <i>C20orf62</i> | 42514038  | 42527398  | 0.99 | 42380380  | T  | 0.843 | 0.0027  | 0.0075 | 7.22E-01   | -0.0109 | 0.0073 | 1.33E-01   | -0.0189 | 0.0083 | 2.27E-02   |
|               |            | 20  | ILMN_2277099      | <i>YWHAB</i>    | 42947757  | 42970575  | 0.99 | 42380380  | T  | 0.843 | -0.0159 | 0.0151 | 2.94E-01   | 0.0212  | 0.0157 | 1.76E-01   | 0.0633  | 0.0301 | 3.52E-02   |
|               |            | 20  | ILMN_1788421      | <i>KCNK15</i>   | 42807901  | 42813082  | 0.99 | 42380380  | T  | 0.843 | -0.0197 | 0.0090 | 2.92E-02   | 0.0126  | 0.0100 | 2.08E-01   | 0.0068  | 0.0131 | 6.03E-01   |
|               |            | 20  | ILMN_1803686      | <i>ADA</i>      | 42681576  | 42713790  | 0.99 | 42380380  | T  | 0.843 | -0.0190 | 0.0174 | 2.75E-01   | -0.0121 | 0.0208 | 5.60E-01   | -0.0714 | 0.0255 | 5.05E-03   |
|               |            | 20  | ILMN_1744442      | <i>TTPAL</i>    | 42537960  | 42556658  | 0.99 | 42380380  | T  | 0.843 | -0.0146 | 0.0153 | 3.38E-01   | 0.0082  | 0.0255 | 7.49E-01   | 0.0510  | 0.0191 | 7.69E-03   |
|               |            | 20  | ILMN_1812548      | <i>GTSF1L</i>   | 41788214  | 41789056  | 0.99 | 42380380  | T  | 0.843 | 0.0128  | 0.0060 | 3.30E-02   | -0.0020 | 0.0070 | 7.70E-01   | 0.0022  | 0.0069 | 7.48E-01   |
|               |            | 20  | ILMN_2079042      | <i>WFDC5</i>    | 43171506  | 43177217  | 0.99 | 42380380  | T  | 0.843 | 0.0158  | 0.0071 | 2.59E-02   | -0.0068 | 0.0352 | 8.47E-01   | -0.0163 | 0.0110 | 1.41E-01   |
|               |            | 20  | ILMN_1760208      | <i>GDAP1L1</i>  | 42309321  | 42342427  | 0.99 | 42380380  | T  | 0.843 | -0.0004 | 0.0067 | 9.48E-01   | -0.0001 | 0.0077 | 9.88E-01   | -0.0210 | 0.0078 | 7.48E-03   |

**Supplementary Table 10. Association results of known T1D loci for T2D.**

| Locus                       | SNP        | Risk allele | N     | OR (CI)          | P-value | Reference |
|-----------------------------|------------|-------------|-------|------------------|---------|-----------|
| <i>HLA</i>                  | rs9267992  | na          | na    | na               | na      | 33        |
| <i>HLA</i>                  | rs660895   | A           | 14832 | 1.02 (0.97-1.08) | 0.411   | 29-32     |
| <i>HLA</i>                  | rs3129941  | A           | 18812 | 1.05 (0.97-1.13) | 0.211   | 34        |
| <i>HLA</i>                  | rs926070   | G           | 18649 | 1.00 (0.95-1.06) | 0.957   | 33        |
| <i>HLA</i>                  | rs2187668  | T           | 14829 | 1.02 (0.92-1.13) | 0.718   | 29-32     |
| <i>HLA</i>                  | rs1048709  | G           | 10725 | 1.04 (0.97-1.11) | 0.226   | 29-32     |
| <i>HLA</i>                  | rs630379   | C           | 13034 | 1.06 (1.00-1.13) | 0.045   | 29-32     |
| <i>INS</i>                  | rs3842748  | G           | 10891 | 1.02 (0.85-1.22) | 0.845   | 29-32     |
| <i>PTPN22</i>               | rs2476601  | na          | na    | na               | na      | 35        |
| <i>CD25</i>                 | rs2104286  | C           | 18807 | 1.05 (0.98-1.12) | 0.141   | 21        |
| <i>CTLA4</i>                | rs1427676  | T           | 18796 | 1.03 (0.98-1.08) | 0.220   | 35        |
| Intergenic region           | rs2165738  | C           | 10832 | 1.07 (1.00-1.14) | 0.035   | 36        |
| Gene desert                 | rs6887079  | C           | 12699 | 1.01 (0.95-1.07) | 0.747   | 36        |
| <i>BACH2</i>                | rs11755527 | C           | 16758 | 1.03 (0.98-1.08) | 0.221   | 36        |
| <i>PRKCQ</i>                | rs947474   | G           | 18733 | 1.03 (0.96-1.10) | 0.436   | 36        |
| <i>CTSH</i>                 | rs3825932  | T           | 12486 | 1.10 (1.01-1.19) | 0.023   | 36        |
| <i>C16orf75, PRM3, TNP2</i> | rs416603   | T           | 18744 | 1.06 (1.00-1.13) | 0.051   | 36        |
| <i>C1QTNF6</i>              | rs229541   | G           | 18731 | 1.02 (0.97-1.07) | 0.369   | 36        |
| <i>RGS1</i>                 | rs2816316  | C           | 18795 | 1.05 (1.00-1.11) | 0.072   | 33        |
| <i>IL18RAP</i>              | rs917997   | C           | 18802 | 1.04 (0.99-1.08) | 0.118   | 33        |
| <i>IFIH1</i>                | rs1990760  | C           | 18761 | 1.08 (1.02-1.15) | 0.007   | 33        |
| <i>CTLA4</i>                | rs3087243  | G           | 18696 | 1.03 (0.97-1.08) | 0.312   | 33        |
| <i>CCR5</i>                 | rs11711054 | G           | 18802 | 1.02 (0.97-1.07) | 0.526   | 33        |
| <i>IL2</i>                  | rs4505848  | G           | 14831 | 1.02 (0.96-1.07) | 0.560   | 33        |
| <i>IL7R</i>                 | rs6897932  | C           | 18816 | 1.03 (0.97-1.09) | 0.315   | 33        |
| <i>MHC</i>                  | rs9268645  | G           | 16665 | 1.00 (0.95-1.05) | 0.977   | 33        |
| <i>BACH2</i>                | rs11755527 | G           | 16758 | 1.03 (0.98-1.08) | 0.221   | 33        |
| <i>TNFAIP3</i>              | rs2327832  | G           | 5983  | 1.42 (0.84-2.38) | 0.191   | 33        |
| <i>TAGAP</i>                | rs1738074  | C           | 14831 | 1.02 (0.97-1.07) | 0.509   | 33        |
| <i>IL2RA</i>                | rs12251307 | C           | 18815 | 1.08 (1.02-1.14) | 0.005   | 33        |
| <i>PRKCQ</i>                | rs11258747 | G           | 18815 | 1.03 (0.91-1.16) | 0.666   | 33        |
| <i>INS</i>                  | rs7111341  | C           | 13049 | 1.03 (0.94-1.13) | 0.501   | 33        |
| <i>ERBB3</i>                | rs2292239  | G           | 12690 | 1.01 (0.94-1.08) | 0.809   | 33        |
| Intergenic region           | rs1678536  | G           | 4512  | 1.05 (0.92-1.20) | 0.431   | 33        |
| <i>SH2B3</i>                | rs3184504  | C           | 5986  | 1.15 (0.48-2.76) | 0.750   | 33        |
| <i>CLEC16A</i>              | rs12708716 | G           | 16562 | 1.02 (0.96-1.08) | 0.624   | 33        |
| <i>PTPN2</i>                | rs1893217  | G           | 18805 | 1.01 (0.96-1.08) | 0.620   | 33        |
| <i>CD226</i>                | rs763361   | C           | 13047 | 1.02 (0.97-1.07) | 0.499   | 33        |
| <i>UBASH3A</i>              | rs11203203 | G           | 18815 | 1.01 (0.90-1.13) | 0.892   | 55        |
| <i>IL10</i>                 | rs3024505  | G           | 18806 | 1.02 (0.89-1.17) | 0.735   | 33        |
| Gene desert                 | rs10517086 | G           | 5987  | 1.18 (0.71-1.96) | 0.534   | 33        |

|                   |            |    |       |                  |        |    |
|-------------------|------------|----|-------|------------------|--------|----|
| <i>C6orf173</i>   | rs9388489  | G  | 16481 | 1.02 (0.90-1.16) | 0.718  | 33 |
| Intergenic region | rs7804356  | C  | 18812 | 1.03 (0.96-1.11) | 0.431  | 33 |
| <i>COBL</i>       | rs4948088  | na | na    | na               | na     | 33 |
| <i>GLIS3</i>      | rs7020673  | G  | 18631 | 1.08 (1.03-1.13) | 0.0008 | 33 |
| <i>C10orf59</i>   | rs10509540 | C  | 14718 | 1.01 (0.95-1.08) | 0.676  | 33 |
| <i>CD69</i>       | rs4763879  | G  | 16459 | 1.03 (0.98-1.08) | 0.193  | 33 |
| Intergenic region | rs1465788  | C  | 18816 | 1.02 (0.97-1.07) | 0.494  | 33 |
| Gene desert       | rs4900384  | G  | 18695 | 1.02 (0.98-1.07) | 0.317  | 33 |
| <i>IL27</i>       | rs4788084  | C  | 18810 | 1.04 (0.99-1.09) | 0.138  | 33 |
| Intergenic region | rs7202877  | G  | 14823 | 1.01 (0.95-1.08) | 0.732  | 33 |
| <i>ORMDL3</i>     | rs2290400  | C  | 14832 | 1.01 (0.96-1.07) | 0.662  | 33 |
| Intergenic region | rs7221109  | C  | 18798 | 1.01 (0.96-1.06) | 0.746  | 33 |
| Intergenic region | rs425105   | C  | 14829 | 1.01 (0.95-1.07) | 0.794  | 33 |
| Intergenic region | rs2281808  | C  | 14673 | 1.01 (0.94-1.08) | 0.761  | 33 |
| Intergenic region | rs5753037  | C  | 18751 | 1.01 (0.97-1.06) | 0.624  | 33 |
| Intergenic region | rs2664170  | na | na    | na               | na     | 33 |
| <i>PGM1</i>       | rs2269241  | C  | 18792 | 1.05 (0.99-1.11) | 0.086  | 33 |
| Gene desert       | rs1534422  | G  | 14831 | 1.02 (0.96-1.08) | 0.588  | 33 |
| Intergenic region | rs12444268 | T  | 5677  | 1.37 (0.83-2.29) | 0.220  | 33 |
| Intergenic region | rs16956936 | na | na    | na               | na     | 33 |

na, not available

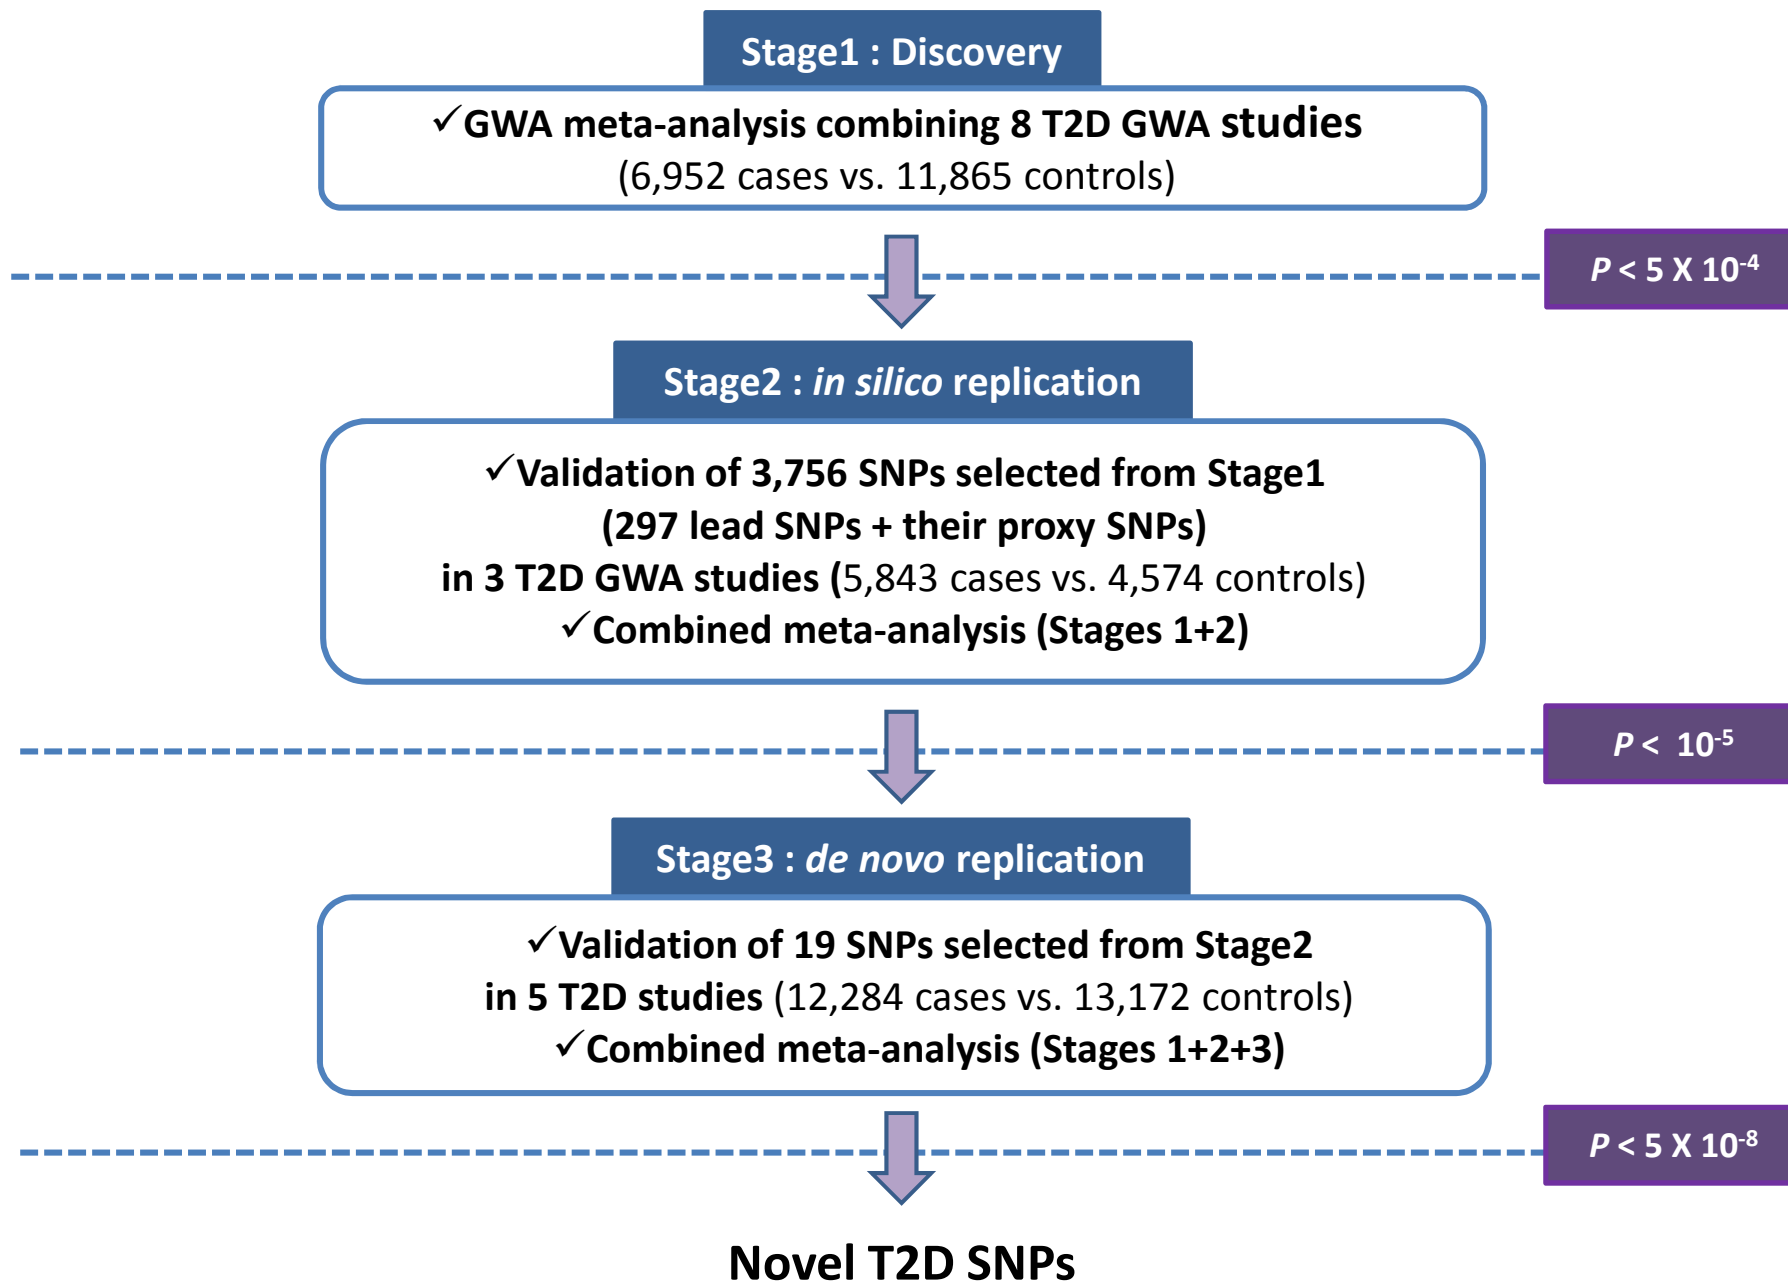

**Supplementary Fig. 1. Overall study scheme of East Asian T2D GWA meta-analysis.**

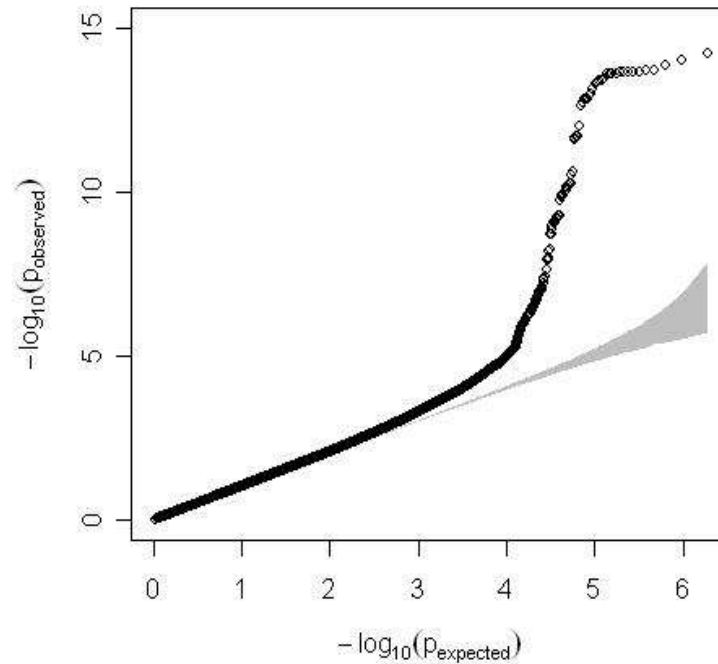

**Supplementary Figure 2. Quantile-quantile plot for the EA T2D stage 1 meta-analysis.**

Observed  $P$ -values of given SNPs against the theoretical distribution of expected  $P$ -values were plotted from the stage 1 meta-analysis for T2D. The shaded region in the QQ plot represents the 95% pointwise confidence interval. A total of 1,934,619 SNPs that were present in  $\geq 5$  stage 1 studies were used to generate a plot.

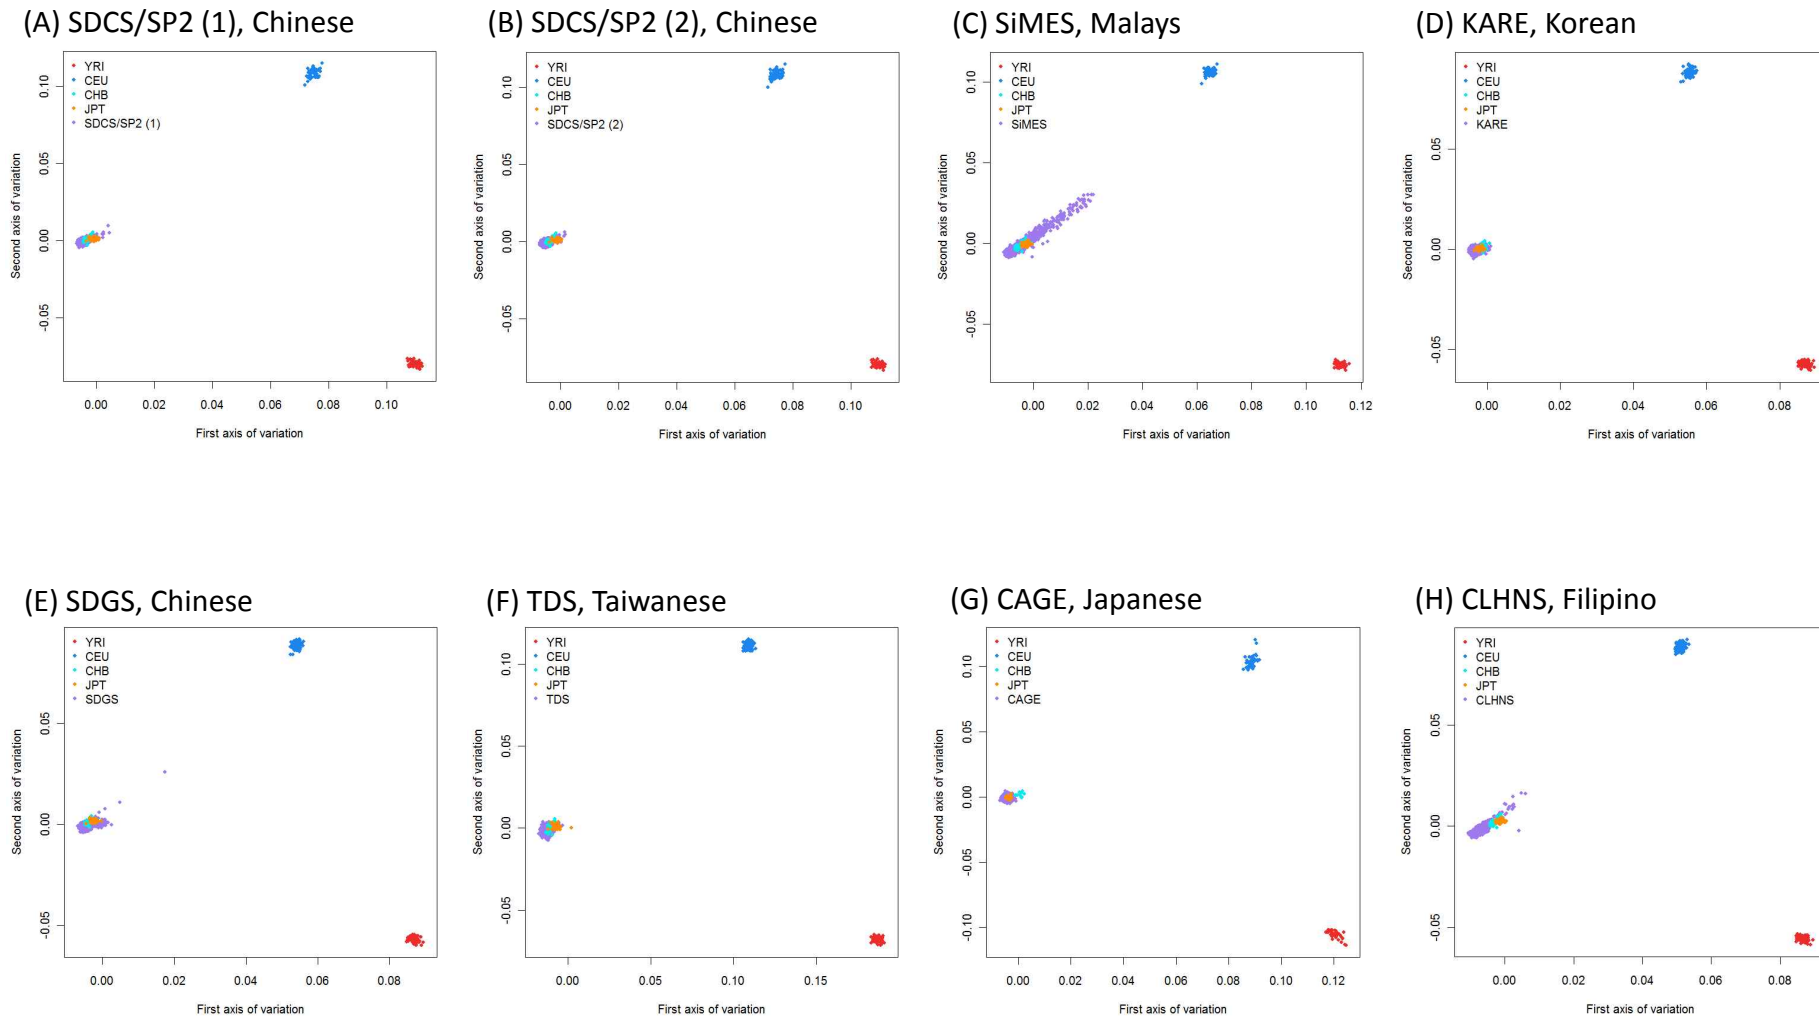

**Supplementary Figure 3. Principal Component Analysis (PCA) in individuals from each component study and HapMap data.** Individuals from 8 each component study - (A) SDCS/SP2 (1) (Chinese), (B) SDCS/SP2 (2) (Chinese), (C) SiMES (Malays), (D) KARE (Korean), (E) SDGS (Chinese), (F) TDS (Taiwanese), (G) CAGE (Japanese), and (H) CLHNS (Filipino) - and 270 HapMap individuals were plotted based on the first two eigenvectors obtained by PCA. Individuals in each component study, HapMap-JPT, HapMap-CHB, HapMap-CEU and HapMap-YRI are represented by violet, orange, cyan, blue and red colored-dots, respectively.
